# Supplementary material for: Functional relevance of seasonal variations in the gut microbiota of the Critically Endangered Hangul (Cervus hanglu hanglu)
Source: Research Square preprint supplement (doi:10.21203/rs.3.rs-6628029/v1), 2025-05-16
Supplement: Supplementary file 1 [file 24f367bc87333986f9d3994e.xlsx]

## Sheet: Differential functional pathway
Table S4 Differential functional pathways amongst all seasonal pairs.
Summer-Spring										Autumn-Spring										Winter-Spring										Autumn-Summer										Winter-Summer
PathwayID	Description	baseMean	log2FoldChange	lfcSE	stat	pvalue	padj			PathwayID	Description	baseMean	log2FoldChange	lfcSE	stat	pvalue	padj			PathwayID	Description	baseMean	log2FoldChange	lfcSE	stat	pvalue	padj			PathwayID	Description	baseMean	log2FoldChange	lfcSE	stat	pvalue	padj			PathwayID	Description	baseMean	log2FoldChange	lfcSE	stat	pvalue	padj
PWY-1361	benzoyl-CoA degradation I (aerobic)	174.181	7.64021	1.07752	7.09056	1.33574e-12	2.84513e-10			PWY-6148	tetrahydromethanopterin biosynthesis	31302.2	-3.81702	0.517802	-7.37157	1.68628e-13	3.74626e-11			PWY-5180	toluene degradation I (aerobic) (via o-cresol)	24543.3	-2.03819	0.379251	-5.37426	7.68961e-08	3.63975e-06			PWY-6654	phosphopantothenate biosynthesis III	31075	-3.05315	0.47928	-6.37029	1.88676e-10	2.6792e-08			PWY-5180	toluene degradation I (aerobic) (via o-cresol)	24543.3	-3.51166	0.329504	-10.6574	1.61018e-26	3.42969e-24
PWY-5655	L-tryptophan degradation IX	745.188	5.04315	0.736772	6.84493	7.65133e-12	8.14867e-10			PWY-6654	phosphopantothenate biosynthesis III	31075	-3.87816	0.526498	-7.36596	1.75881e-13	3.74626e-11			PWY-5182	toluene degradation II (aerobic) (via 4-methylcatechol)	24543.3	-2.03819	0.379251	-5.37426	7.68961e-08	3.63975e-06			METHANOGENESIS-PWY	methanogenesis from H2 and CO2	28917.7	-3.13262	0.502731	-6.23121	4.62839e-10	3.87428e-08			PWY-5182	toluene degradation II (aerobic) (via 4-methylcatechol)	24543.3	-3.51166	0.329504	-10.6574	1.61018e-26	3.42969e-24
NADSYN-PWY	NAD biosynthesis II (from tryptophan)	6098.11	3.65887	0.572373	6.39245	1.63249e-10	9.93487e-09			METHANOGENESIS-PWY	methanogenesis from H2 and CO2	28917.7	-3.93705	0.552256	-7.12902	1.01083e-12	8.61227e-11			PWY0-321	phenylacetate degradation I (aerobic)	4077.82	-2.91151	0.534985	-5.44223	5.26176e-08	3.63975e-06			P241-PWY	coenzyme B biosynthesis	26144.2	-3.03282	0.494121	-6.13782	8.36637e-10	3.87428e-08			P125-PWY	superpathway of (R,R)-butanediol biosynthesis	6819.43	-3.90443	0.408572	-9.55628	1.22062e-21	1.73329e-19
PWY-5651	L-tryptophan degradation to 2-amino-3-carboxymuconate semialdehyde	3885.67	3.68628	0.575654	6.40364	1.51719e-10	9.93487e-09			PWY-7286	7-(3-amino-3-carboxypropyl)-wyosine biosynthesis	23320.2	-3.96253	0.555806	-7.12934	1.00854e-12	8.61227e-11			PWY-4361	S-methyl-5-thio-&alpha;-D-ribose 1-phosphate degradation	7828.51	-3.70526	0.717749	-5.16233	2.43893e-07	9.44532e-06			PWY-6148	tetrahydromethanopterin biosynthesis	31302.2	-2.8948	0.471364	-6.14132	8.1839e-10	3.87428e-08			NADSYN-PWY	NAD biosynthesis II (from tryptophan)	6098.11	-4.60351	0.502306	-9.16475	4.96618e-20	4.23119e-18
PWY-5647	2-nitrobenzoate degradation I	2489.18	3.74353	0.616353	6.07367	1.25017e-09	6.65713e-08			PWY-6349	CDP-archaeol biosynthesis	19388	-3.82314	0.540789	-7.06957	1.5542e-12	9.45841e-11			PWY-6713	L-rhamnose degradation II	143.726	2.93926	0.572368	5.13526	2.81756e-07	1.00023e-05			PWY-6174	mevalonate pathway II (archaea)	22875.6	-2.93099	0.476514	-6.15091	7.70387e-10	3.87428e-08			PWY-5651	L-tryptophan degradation to 2-amino-3-carboxymuconate semialdehyde	3885.67	-4.63241	0.505264	-9.1683	4.80548e-20	4.23119e-18
PWY-6505	L-tryptophan degradation XII (Geobacillus)	3676.08	3.59791	0.618404	5.81805	5.95387e-09	2.81816e-07			PWY-6350	archaetidylinositol biosynthesis	19066.5	-3.85781	0.545311	-7.07451	1.49973e-12	9.45841e-11			PWY-5181	toluene degradation III (aerobic) (via p-cresol)	4065.07	-2.94863	0.582999	-5.0577	4.24341e-07	1.36849e-05			PWY-6349	CDP-archaeol biosynthesis	19388	-3.01515	0.492306	-6.12454	9.09456e-10	3.87428e-08			TCA-GLYOX-BYPASS	superpathway of glyoxylate bypass and TCA	36310.4	-3.47339	0.390313	-8.89898	5.63614e-19	4.00166e-17
PWY-6906	chitin derivatives degradation	1116.91	2.6625	0.468255	5.686	1.3005e-08	5.54015e-07			P261-PWY	coenzyme M biosynthesis I	24125.1	-3.56371	0.507197	-7.02628	2.12105e-12	9.63212e-11			PWY-6071	superpathway of phenylethylamine degradation	3027.62	-2.69306	0.543518	-4.95486	7.23809e-07	1.92714e-05			PWY-6350	archaetidylinositol biosynthesis	19066.5	-3.05597	0.496424	-6.15596	7.46225e-10	3.87428e-08			PWY-5415	catechol degradation I (meta-cleavage pathway)	12602.4	-3.81421	0.434828	-8.77178	1.75871e-18	1.0703e-16
PWY-5654	2-amino-3-carboxymuconate semialdehyde degradation to 2-oxopentenoate	2720.57	3.36083	0.612012	5.49144	3.9867e-08	1.54394e-06			PWY-6141	archaetidylserine and archaetidylethanolamine biosynthesis	19207.5	-3.88431	0.552579	-7.02942	2.07398e-12	9.63212e-11			PWY-7527	L-methionine salvage cycle III	9900.61	-3.25058	0.683259	-4.75746	1.96041e-06	4.63964e-05			PWY-7286	7-(3-amino-3-carboxypropyl)-wyosine biosynthesis	23320.2	-3.15916	0.50597	-6.24376	4.27176e-10	3.87428e-08			PWY-6505	L-tryptophan degradation XII (Geobacillus)	3676.08	-4.73557	0.542819	-8.72404	2.68457e-18	1.42953e-16
P125-PWY	superpathway of (R,R)-butanediol biosynthesis	6819.43	2.53392	0.465573	5.44259	5.25112e-08	1.86415e-06			PWY-6174	mevalonate pathway II (archaea)	22875.6	-3.67324	0.523451	-7.01736	2.26106e-12	9.63212e-11			PWY-1361	benzoyl-CoA degradation I (aerobic)	174.181	5.09622	1.08819	4.68319	2.82442e-06	5.99885e-05			PWY-6141	archaetidylserine and archaetidylethanolamine biosynthesis	19207.5	-3.0717	0.50304	-6.10627	1.01988e-09	3.9497e-08			GLYCOLYSIS-TCA-GLYOX-BYPASS	superpathway of glycolysis, pyruvate dehydrogenase, TCA, and glyoxylate bypass	55604.1	-3.1009	0.356827	-8.6902	3.61817e-18	1.68766e-16
ENTBACSYN-PWY	enterobactin biosynthesis	7676.7	2.71748	0.51836	5.24245	1.58462e-07	4.82178e-06			P241-PWY	coenzyme B biosynthesis	26144.2	-3.78976	0.542797	-6.98191	2.91202e-12	1.12775e-10			TCA-GLYOX-BYPASS	superpathway of glyoxylate bypass and TCA	36310.4	-2.09966	0.449244	-4.67377	2.95718e-06	5.99885e-05			P261-PWY	coenzyme M biosynthesis I	24125.1	-2.78071	0.461715	-6.02257	1.71671e-09	6.0943e-08			PWY-5647	2-nitrobenzoate degradation I	2489.18	-4.69669	0.5411	-8.67989	3.96164e-18	1.68766e-16
PWY-5419	catechol degradation to 2-oxopent-4-enoate II	6402.51	3.09498	0.607585	5.09391	3.50755e-07	9.96143e-06			PWY-5198	factor 420 biosynthesis	19712	-3.79013	0.547116	-6.92748	4.28405e-12	1.52084e-10			PWY-6906	chitin derivatives degradation	1116.91	2.15632	0.472888	4.5599	5.11779e-06	9.47904e-05			PWY-5198	factor 420 biosynthesis	19712	-2.99296	0.498063	-6.00919	1.8645e-09	6.10983e-08			P105-PWY	TCA cycle IV (2-oxoglutarate decarboxylase)	81221.7	-2.80398	0.323948	-8.65565	4.90116e-18	1.89809e-16
PWY-5420	catechol degradation II (meta-cleavage pathway)	7931.24	2.85367	0.585923	4.87038	1.11383e-06	2.79113e-05			PWY-6167	flavin biosynthesis II (archaea)	50449.9	-3.79181	0.596964	-6.35182	2.12785e-10	6.97281e-09			PWY-5183	superpathway of aerobic toluene degradation	2760.09	-2.61103	0.597617	-4.36907	1.24778e-05	0.000204444			PWY-6167	flavin biosynthesis II (archaea)	50449.9	-2.9067	0.543408	-5.34903	8.8429e-08	1.88354e-06			PWY-5419	catechol degradation to 2-oxopent-4-enoate II	6402.51	-4.41768	0.533197	-8.28527	1.17842e-16	3.58575e-15
LPSSYN-PWY	superpathway of lipopolysaccharide biosynthesis	320.642	4.99963	1.03968	4.8088	1.5184e-06	3.59355e-05			RUMP-PWY	formaldehyde oxidation I	58324.4	-2.00606	0.324873	-6.17489	6.62086e-10	2.01463e-08			PWY-5178	toluene degradation IV (aerobic) (via catechol)	3473.61	-2.24451	0.525156	-4.274	1.91999e-05	0.00028204			PWY-1861	formaldehyde assimilation II (RuMP Cycle)	132140	-2.01284	0.391645	-5.13944	2.75562e-07	4.22175e-06			PWY-5430	meta cleavage pathway of aromatic compounds	3399.4	-3.98939	0.484876	-8.22765	1.90919e-16	5.15327e-15
KDO-NAGLIPASYN-PWY	superpathway of (Kdo)2-lipid A biosynthesis	6275.9	2.4832	0.539926	4.59914	4.2423e-06	8.60581e-05			PWY-1861	formaldehyde assimilation II (RuMP Cycle)	132140	-2.44316	0.430254	-5.67842	1.35947e-08	3.61958e-07			PWY-7431	aromatic biogenic amine degradation (bacteria)	7548.94	-2.40495	0.584157	-4.11696	3.83896e-05	0.000527547			PWY-5531	chlorophyllide a biosynthesis II (anaerobic)	740.404	2.11894	0.513839	4.12373	3.7278e-05	0.000145692			PWY-5654	2-amino-3-carboxymuconate semialdehyde degradation to 2-oxopentenoate	2720.57	-4.41933	0.537238	-8.22601	1.9355e-16	5.15327e-15
PWY-6713	L-rhamnose degradation II	143.726	2.5268	0.56695	4.45683	8.31815e-06	0.000154067			NAD-BIOSYNTHESIS-II	NAD salvage pathway II	36038.9	-2.33478	0.42476	-5.49672	3.86931e-08	9.69604e-07			PROTOCATECHUATE-ORTHO-CLEAVAGE-PWY	protocatechuate degradation II (ortho-cleavage pathway)	7482.34	-2.02968	0.5059	-4.01201	6.02038e-05	0.000754319			PWY-7159	chlorophyllide a biosynthesis III (aerobic, light independent)	740.404	2.11894	0.513839	4.12373	3.7278e-05	0.000145692			PWY-5178	toluene degradation IV (aerobic) (via catechol)	3473.61	-3.69687	0.456302	-8.10182	5.41423e-16	1.35674e-14
THREOCAT-PWY	superpathway of L-threonine metabolism	969.664	3.15643	0.742821	4.24924	2.14496e-05	0.000338427			CODH-PWY	reductive acetyl coenzyme A pathway	4326.88	-2.72462	0.518125	-5.25862	1.45139e-07	3.25418e-06			PWY-6185	4-methylcatechol degradation (ortho cleavage)	2512.51	-2.09212	0.539693	-3.87649	0.000105972	0.00113442			PWY-7431	aromatic biogenic amine degradation (bacteria)	7548.94	2.34137	0.635849	3.68227	0.000231171	0.000820656			PWY-5420	catechol degradation II (meta-cleavage pathway)	7931.24	-4.14864	0.514154	-8.06887	7.09543e-16	1.67925e-14
LACTOSECAT-PWY	lactose and galactose degradation I	3743.53	-2.70299	0.648995	-4.16489	3.11503e-05	0.000457587			PWY-5910	superpathway of geranylgeranyldiphosphate biosynthesis I (via mevalonate)	9409.24	-2.45184	0.470396	-5.21228	1.8653e-07	3.97308e-06			PWY-5088	L-glutamate degradation VIII (to propanoate)	385.972	2.43109	0.659717	3.68506	0.000228649	0.00183782			PWY-1361	benzoyl-CoA degradation I (aerobic)	174.181	-3.38507	1.15487	-2.93114	0.00337719	0.00895477			PWY-7254	TCA cycle VII (acetate-producers)	43223.7	-3.01631	0.385397	-7.82652	5.01564e-15	1.12456e-13
PWY-5430	meta cleavage pathway of aromatic compounds	3399.4	2.2528	0.552387	4.0783	4.53669e-05	0.000644211			PWY-922	mevalonate pathway I	6650.68	-2.46374	0.476294	-5.17273	2.30699e-07	4.67989e-06			GALLATE-DEGRADATION-I-PWY	gallate degradation II	310.094	-2.92956	0.906941	-3.23015	0.00123723	0.00878436			THREOCAT-PWY	superpathway of L-threonine metabolism	969.664	-2.244	0.816563	-2.7481	0.00599413	0.0151994			GLYOXYLATE-BYPASS	glyoxylate cycle	29637.7	-2.75525	0.358002	-7.6962	1.40171e-14	2.84347e-13
METHGLYUT-PWY	superpathway of methylglyoxal degradation	859.149	2.35524	0.633817	3.71596	0.000202435	0.00179661			KDO-NAGLIPASYN-PWY	superpathway of (Kdo)2-lipid A biosynthesis	6275.9	3.27847	0.65199	5.0284	4.94591e-07	9.57707e-06			METHYLGALLATE-DEGRADATION-PWY	methylgallate degradation	387.457	-2.92781	0.907915	-3.22476	0.00126079	0.00880486			PWY-4361	S-methyl-5-thio-&alpha;-D-ribose 1-phosphate degradation	7828.51	-2.06485	0.78121	-2.64314	0.00821414	0.0195456			PWY-6396	superpathway of 2,3-butanediol biosynthesis	4093.48	-2.82857	0.377576	-7.49139	6.81479e-14	1.31959e-12
ECASYN-PWY	enterobacterial common antigen biosynthesis	1025.12	2.7057	0.747853	3.61795	0.000296945	0.00252997			LACTOSECAT-PWY	lactose and galactose degradation I	3743.53	-3.90476	0.784104	-4.97991	6.36154e-07	1.12917e-05			LPSSYN-PWY	superpathway of lipopolysaccharide biosynthesis	320.642	3.01182	1.05011	2.8681	0.0041294	0.0225529													PWY-7094	fatty acid salvage	41419.4	-2.43913	0.328191	-7.43205	1.0693e-13	1.98053e-12
ARGDEG-PWY	superpathway of L-arginine, putrescine, and 4-aminobutanoate degradation	662.937	2.05221	0.69956	2.93357	0.00335087	0.0110657			PWY-5647	2-nitrobenzoate degradation I	2489.18	3.65928	0.744226	4.91689	8.79287e-07	1.49831e-05			ECASYN-PWY	enterobacterial common antigen biosynthesis	1025.12	2.05591	0.755227	2.72224	0.00648419	0.0317924													3-HYDROXYPHENYLACETATE-DEGRADATION-PWY	4-hydroxyphenylacetate degradation	4236.99	-3.30766	0.448331	-7.37773	1.61011e-13	2.75736e-12
ORNARGDEG-PWY	superpathway of L-arginine and L-ornithine degradation	662.937	2.05221	0.69956	2.93357	0.00335087	0.0110657			NADSYN-PWY	NAD biosynthesis II (from tryptophan)	6098.11	3.31455	0.691175	4.79552	1.62251e-06	2.38342e-05																							PWY-4361	S-methyl-5-thio-&alpha;-D-ribose 1-phosphate degradation	7828.51	-4.60052	0.623624	-7.37707	1.61817e-13	2.75736e-12
PWY-6944	androstenedione degradation	124.947	2.79058	0.95045	2.93606	0.00332408	0.0110657			PWY-5651	L-tryptophan degradation to 2-amino-3-carboxymuconate semialdehyde	3885.67	3.34291	0.695118	4.80913	1.51586e-06	2.38342e-05																							PWY-5183	superpathway of aerobic toluene degradation	2760.09	-3.72076	0.519277	-7.16527	7.7634e-13	1.14042e-11
PWY-6562	norspermidine biosynthesis	721.095	2.04601	0.698436	2.92942	0.00339599	0.0111284			PWY-6505	L-tryptophan degradation XII (Geobacillus)	3676.08	3.5299	0.74674	4.72708	2.27774e-06	3.13005e-05																							PWY-7527	L-methionine salvage cycle III	9900.61	-4.21506	0.593646	-7.10029	1.24495e-12	1.76783e-11
										PWY-5654	2-amino-3-carboxymuconate semialdehyde degradation to 2-oxopentenoate	2720.57	3.43434	0.73901	4.64723	3.36429e-06	4.47871e-05																							PWY-6185	4-methylcatechol degradation (ortho cleavage)	2512.51	-3.32699	0.468933	-7.09481	1.29527e-12	1.77995e-11
										PWY-5005	biotin biosynthesis II	23272.4	-2.10693	0.490523	-4.29527	1.74483e-05	0.000195605																							PWY-5005	biotin biosynthesis II	23272.4	2.43307	0.356349	6.82777	8.62467e-12	1.11337e-10
										PWY-5419	catechol degradation to 2-oxopent-4-enoate II	6402.51	2.98292	0.733709	4.06554	4.79221e-05	0.000497922																							PWY-6182	superpathway of salicylate degradation	3006.19	-2.90479	0.436883	-6.6489	2.95291e-11	3.59411e-10
										ENTBACSYN-PWY	enterobactin biosynthesis	7676.7	2.54126	0.625969	4.05972	4.9132e-05	0.000498339																							PWY0-321	phenylacetate degradation I (aerobic)	4077.82	-3.07389	0.464847	-6.61269	3.77402e-11	4.34522e-10
										PWY-5420	catechol degradation II (meta-cleavage pathway)	7931.24	2.85949	0.707555	4.04136	5.31417e-05	0.000520022																							PWY-5417	catechol degradation III (ortho-cleavage pathway)	3029.86	-2.90858	0.443322	-6.56087	5.34931e-11	5.69702e-10
										PWY-5655	L-tryptophan degradation IX	745.188	3.58714	0.889296	4.03369	5.49071e-05	0.000520022																							PWY-5431	aromatic compounds degradation via &beta;-ketoadipate	3029.86	-2.90858	0.443322	-6.56087	5.34931e-11	5.69702e-10
										PWY-5415	catechol degradation I (meta-cleavage pathway)	12602.4	2.06957	0.598408	3.45847	0.000543262	0.0046286																							P461-PWY	hexitol fermentation to lactate, formate, ethanol and acetate	13054.2	-2.40661	0.374358	-6.42864	1.28754e-10	1.30593e-09
										PWY-1361	benzoyl-CoA degradation I (aerobic)	174.181	4.25513	1.29297	3.29098	0.00099838	0.00773291																							PWY-6071	superpathway of phenylethylamine degradation	3027.62	-3.00082	0.472266	-6.35409	2.09668e-10	1.98485e-09
										PWY-5430	meta cleavage pathway of aromatic compounds	3399.4	2.01089	0.667064	3.01454	0.00257372	0.0174032																							ENTBACSYN-PWY	enterobactin biosynthesis	7676.7	-2.86647	0.454799	-6.30271	2.92492e-10	2.65109e-09
										LPSSYN-PWY	superpathway of lipopolysaccharide biosynthesis	320.642	3.57041	1.25475	2.84551	0.00443406	0.0266044																							PWY-4984	urea cycle	41335.1	-2.25139	0.358733	-6.27595	3.47507e-10	3.08412e-09
																																								CATECHOL-ORTHO-CLEAVAGE-PWY	catechol degradation to &beta;-ketoadipate	2704.75	-2.58654	0.432598	-5.9791	2.2438e-09	1.77011e-08
																																								P281-PWY	3-phenylpropanoate degradation	2487.35	-2.44575	0.410559	-5.95713	2.56704e-09	1.98829e-08
																																								PWY-7295	L-arabinose degradation IV	1332.26	-2.96962	0.517358	-5.73997	9.46959e-09	6.40324e-08
																																								PWY-5181	toluene degradation III (aerobic) (via p-cresol)	4065.07	-2.73736	0.506563	-5.40378	6.52509e-08	3.91505e-07
																																								PWY-5655	L-tryptophan degradation IX	745.188	-3.30992	0.645366	-5.12875	2.91672e-07	1.55315e-06
																																								P221-PWY	octane oxidation	1412.34	-2.96556	0.589129	-5.03379	4.80864e-07	2.49815e-06
																																								PWY-6562	norspermidine biosynthesis	721.095	-2.94272	0.613066	-4.80001	1.58659e-06	7.76883e-06
																																								PROTOCATECHUATE-ORTHO-CLEAVAGE-PWY	protocatechuate degradation II (ortho-cleavage pathway)	7482.34	-2.02325	0.43955	-4.60301	4.16421e-06	1.9932e-05
																																								LACTOSECAT-PWY	lactose and galactose degradation I	3743.53	2.4485	0.569419	4.3	1.70801e-05	6.92965e-05
																																								PWY0-1277	3-phenylpropanoate and 3-(3-hydroxyphenyl)propanoate degradation	1754.51	-2.1802	0.532701	-4.09272	4.26347e-05	0.000163625
																																								PWY-7391	isoprene biosynthesis II (engineered)	2628.61	2.00563	0.508225	3.94635	7.93528e-05	0.000291416
																																								DHGLUCONATE-PYR-CAT-PWY	glucose degradation (oxidative)	895.375	-2.26333	0.583788	-3.87697	0.000105766	0.000378624
																																								HCAMHPDEG-PWY	3-phenylpropanoate and 3-(3-hydroxyphenyl)propanoate degradation to 2-oxopent-4-enoate	604.856	-2.14311	0.568907	-3.76708	0.000165171	0.000549709
																																								PWY-6690	cinnamate and 3-hydroxycinnamate degradation to 2-oxopent-4-enoate	604.856	-2.14311	0.568907	-3.76708	0.000165171	0.000549709
																																								PWY-6470	peptidoglycan biosynthesis V (&beta;-lactam resistance)	35100.4	-2.00279	0.55199	-3.6283	0.000285291	0.00090697
																																								PWY-5529	superpathway of bacteriochlorophyll a biosynthesis	404.907	2.91063	0.86728	3.35604	0.000790663	0.00221594
																																								PWY-6944	androstenedione degradation	124.947	-2.7408	0.834115	-3.28588	0.00101663	0.00264076
																																								CRNFORCAT-PWY	creatinine degradation I	447.292	-2.44215	0.773124	-3.1588	0.00158418	0.00379136
																																								PWY-1361	benzoyl-CoA degradation I (aerobic)	174.181	-2.54399	0.919845	-2.76567	0.00568066	0.011469
																																								GALLATE-DEGRADATION-I-PWY	gallate degradation II	310.094	-2.08695	0.788466	-2.64685	0.00812454	0.0155903
																																								METHYLGALLATE-DEGRADATION-PWY	methylgallate degradation	387.457	-2.08419	0.789212	-2.64085	0.00826974	0.0157978
																																								P184-PWY	protocatechuate degradation I (meta-cleavage pathway)	221.097	-2.6606	1.14811	-2.31736	0.0204839	0.03591
















[truncated: 8 more columns]
