# Supplementary material for: Functional relevance of seasonal variations in the gut microbiota of the Critically Endangered Hangul (Cervus hanglu hanglu)
Source: Research Square preprint supplement (doi:10.21203/rs.3.rs-6628029/v1), 2025-05-16
Supplement: Supplementary file 2 [file 2ff680c84ba877b2f9a66d1c.xlsx]

## Sheet: Node properties
Table S5 Node Properties
Spring																				Summer																				Autumn
AverageShortestPathLength	BetweennessCentrality	ClosenessCentrality	ClusteringCoefficient	Degree	Eccentricity	IsSingleNode	Name	NeighborhoodConnectivity	NumberOfDirectedEdges	NumberOfUndirectedEdges	PartnerOfMultiEdgedNodePairs	Radiality	selected	SelfLoops	shared name	Stress	TopologicalCoefficient			AverageShortestPathLength	BetweennessCentrality	ClosenessCentrality	ClusteringCoefficient	Degree	Eccentricity	IsSingleNode	name	NeighborhoodConnectivity	NumberOfDirectedEdges	NumberOfUndirectedEdges	PartnerOfMultiEdgedNodePairs	Radiality	selected	SelfLoops	shared name	Stress	TopologicalCoefficient			AverageShortestPathLength	BetweennessCentrality	ClosenessCentrality	ClusteringCoefficient	Degree	Eccentricity	IsSingleNode	Name	NeighborhoodConnectivity	NumberOfDirectedEdges
3.1453	0.00919436	0.317935	0.774983	54	11	FALSE	Arthrobacter_B	45.6481	0	54	0	0.960995	FALSE	0	Arthrobacter_B	29986	0.608642			1	0	1	1	2	1	FALSE	Azorhizobium	2	0	2	0	1	FALSE	0	Azorhizobium	0	1			2.02941	0.0114693	0.492754	0.871345	19	6	FALSE	Novosphingobium_485350	18.9474	0
3.1453	0.00919436	0.317935	0.774983	54	11	FALSE	Peribacillus_301373	45.6481	0	54	0	0.960995	FALSE	0	Peribacillus_301373	29986	0.608642			1	0	1	1	2	1	FALSE	Caulobacter_487784	2	0	2	0	1	FALSE	0	Caulobacter_487784	0	1			1.91176	0.0212133	0.523077	0.852632	20	6	FALSE	Brachybacterium	18.8	0
2.94118	0.137255	0.34	0.8	5	5	FALSE	Bradyrhizobium	4.6	0	5	0	0.611765	FALSE	0	Bradyrhizobium	140	0.657143			1.45714	0.00557798	0.686275	0.92029	24	4	FALSE	RUG13615	23.3333	0	24	0	0.983673	FALSE	0	RUG13615	204	0.752688			2.02941	0.0114693	0.492754	0.871345	19	6	FALSE	FD2005	18.9474	0
2.94118	0.137255	0.34	0.8	5	5	FALSE	Ralstonia	4.6	0	5	0	0.611765	FALSE	0	Ralstonia	140	0.657143			1.45714	0.00557798	0.686275	0.92029	24	4	FALSE	QAMH01	23.3333	0	24	0	0.983673	FALSE	0	QAMH01	204	0.752688			2.45652	0.10413	0.40708	0.695238	15	8	FALSE	Treponema_D	13	0
3.41176	0	0.293103	1	4	6	FALSE	Azorhizobium	5	0	4	0	0.517647	FALSE	0	Azorhizobium	0	0.833333			1.45714	0.00557798	0.686275	0.92029	24	4	FALSE	Methanobrevibacter_D_1148	23.3333	0	24	0	0.983673	FALSE	0	Methanobrevibacter_D_1148	204	0.752688			2.45652	0.10413	0.40708	0.695238	15	8	FALSE	WQSK01	13	0
3.11765	0.441176	0.320755	0.6	5	6	FALSE	Caulobacter_487784	4.4	0	5	0	0.576471	FALSE	0	Caulobacter_487784	340	0.6			1.45714	0.00557798	0.686275	0.92029	24	4	FALSE	Eubacterium_T	23.3333	0	24	0	0.983673	FALSE	0	Eubacterium_T	204	0.752688			1.76471	0.0122234	0.566667	0.888889	19	5	FALSE	Reyranella	19.3684	0
3.1453	0.00919436	0.317935	0.774983	54	11	FALSE	Marvinbryantia	45.6481	0	54	0	0.960995	FALSE	0	Marvinbryantia	29986	0.608642			1.45714	0.00557798	0.686275	0.92029	24	4	FALSE	UBA4285	23.3333	0	24	0	0.983673	FALSE	0	UBA4285	204	0.752688			1.73529	0.0152933	0.576271	0.873684	20	5	FALSE	Azorhizobium	19.2	0
3.17094	0.00631348	0.315364	0.793179	53	11	FALSE	UMGS1994	46.1321	0	53	0	0.960528	FALSE	0	UMGS1994	19250	0.623406			1.45714	0.00448513	0.686275	0.916667	24	4	FALSE	UBA9715	23.2917	0	24	0	0.983673	FALSE	0	UBA9715	52	0.751344			1.94118	0.0034416	0.515152	0.923977	19	6	FALSE	Aquabacterium_B_592457	19.5789	0
3.15385	0.00883637	0.317073	0.762963	55	11	FALSE	Eubacterium_R	45.4182	0	55	0	0.960839	FALSE	0	Eubacterium_R	26184	0.613759			1.48571	0.000626	0.673077	0.972332	23	4	FALSE	Copromorpha	24	0	23	0	0.982653	FALSE	0	Copromorpha	14	0.774194			1.91176	0.0102895	0.523077	0.852632	20	6	FALSE	Williamsia_A	18.85	0
3.17949	0.00838162	0.314516	0.789593	52	11	FALSE	Adlercreutzia_404218	46.1346	0	52	0	0.960373	FALSE	0	Adlercreutzia_404218	29008	0.631981			1.45714	0.00557798	0.686275	0.92029	24	4	FALSE	RUG472	23.3333	0	24	0	0.983673	FALSE	0	RUG472	204	0.752688			1.4	0.0611111	0.714286	0.761905	7	3	FALSE	CAG-1252	5.85714	0
3.21368	0.0204408	0.31117	0.757092	48	11	FALSE	UBA2730	44.8958	0	48	0	0.959751	FALSE	0	UBA2730	14952	0.615011			1	0	1	1	3	1	FALSE	UBA1711	3	0	3	0	1	FALSE	0	UBA1711	0	1			1.4	0.0611111	0.714286	0.761905	7	3	FALSE	CAG-964	5.85714	0
2.93162	0.0536465	0.341108	0.763922	51	10	FALSE	CAG-273	45.451	0	51	0	0.96488	FALSE	0	CAG-273	110232	0.598039			1	0	1	1	3	1	FALSE	CAG-475	3	0	3	0	1	FALSE	0	CAG-475	0	1			1.94118	0.0034416	0.515152	0.923977	19	6	FALSE	Aquabacterium_A	19.5789	0
2.93162	0.0542389	0.341108	0.743529	51	10	FALSE	CAG-710	44.9216	0	51	0	0.96488	FALSE	0	CAG-710	110972	0.591073			1.45714	0.00448513	0.686275	0.916667	24	4	FALSE	UBA1367	23.2917	0	24	0	0.983673	FALSE	0	UBA1367	52	0.751344			1.76471	0.0314208	0.566667	0.785714	21	5	FALSE	VBCK01	18.2857	0
3.19658	0.00652967	0.312834	0.837585	49	11	FALSE	Suipraeoptans	47.3878	0	49	0	0.960062	FALSE	0	Suipraeoptans	3404	0.623523			1	0	1	1	2	1	FALSE	Ralstonia	2	0	2	0	1	FALSE	0	Ralstonia	0	1			1.64706	0.0367538	0.607143	0.774892	22	5	FALSE	Taonella	18.1818	0
3.1453	0.00917908	0.317935	0.826122	50	11	FALSE	RUG521	47	0	50	0	0.960995	FALSE	0	RUG521	10578	0.602564			1.48571	0.00459417	0.673077	0.936759	23	4	FALSE	Clostridium_T	23.4348	0	23	0	0.982653	FALSE	0	Clostridium_T	170	0.755961			1.64706	0.0367538	0.607143	0.774892	22	5	FALSE	UBA1930	18.1818	0
2.94118	0.137255	0.34	0.8	5	5	FALSE	UBA1930	4.6	0	5	0	0.611765	FALSE	0	UBA1930	140	0.657143			1	0	1	1	3	1	FALSE	Coprenecus	3	0	3	0	1	FALSE	0	Coprenecus	0	1			1.76471	0.0122234	0.566667	0.888889	19	5	FALSE	Bradyrhizobium	19.3684	0
3.15385	0.0191216	0.317073	0.742837	54	11	FALSE	Aureimonas_A_501548	44.7593	0	54	0	0.960839	FALSE	0	Aureimonas_A_501548	32704	0.604855			1.48571	0.000626	0.673077	0.972332	23	4	FALSE	Turicibacter	24	0	23	0	0.982653	FALSE	0	Turicibacter	14	0.774194			1.67647	0.0266791	0.596491	0.819048	21	5	FALSE	Ralstonia	18.7143	0
3.20513	0.00441267	0.312	0.823673	50	11	FALSE	BX12	47.14	0	50	0	0.959907	FALSE	0	BX12	13694	0.645753			1.51429	0.000168	0.660377	0.991342	22	4	FALSE	Clostridioides_A	24.1364	0	22	0	0.981633	FALSE	0	Clostridioides_A	4	0.778592			1.64706	0.0377011	0.607143	0.766234	22	5	FALSE	Brevundimonas	18.0909	0
3.12821	0.0148002	0.319672	0.740067	55	11	FALSE	Pradoshia	44.8364	0	55	0	0.961305	FALSE	0	Pradoshia	28962	0.597818			1.28571	0.0343234	0.777778	0.803077	26	3	FALSE	Anaerofilum_73741	22.0769	0	26	0	0.989796	FALSE	0	Anaerofilum_73741	432	0.649321			1.70588	0.0216518	0.586207	0.842857	21	5	FALSE	Haliangium_463188	18.8571	0
3.18803	0.00756738	0.313673	0.799216	51	11	FALSE	Actinomyces	46.3725	0	51	0	0.960218	FALSE	0	Actinomyces	28036	0.63524			1.22857	0.087018	0.813953	0.71164	28	3	FALSE	RUG13038	21.1071	0	28	0	0.991837	FALSE	0	RUG13038	1070	0.620798			1.67647	0.0266791	0.596491	0.819048	21	5	FALSE	Caulobacter_487784	18.7143	0
3.17949	0.0102869	0.314516	0.781297	52	11	FALSE	DSXL01	45.9038	0	52	0	0.960373	FALSE	0	DSXL01	29408	0.62882			1.11111	0.106481	0.9	0.75	8	2	FALSE	Emergencia	6.375	0	8	0	0.986111	FALSE	0	Emergencia	18	0.708333			2	0.0130332	0.5	0.768421	20	6	FALSE	Traorella	17	0
3.17949	0.00587647	0.314516	0.803922	52	11	FALSE	Akkermansia	46.4808	0	52	0	0.960373	FALSE	0	Akkermansia	18748	0.628119			1.22222	0.00925926	0.818182	0.952381	7	2	FALSE	BX12	7.14286	0	7	0	0.972222	FALSE	0	BX12	4	0.793651			2.02381	0.00993001	0.494118	0.807018	19	6	FALSE	Eisenbergiella	17.4737	0
3.19658	0.00650378	0.312834	0.817959	50	11	FALSE	Duncaniella	47	0	50	0	0.960062	FALSE	0	Duncaniella	19980	0.643836			1.42857	0.0147819	0.7	0.853333	25	4	FALSE	Peribacillus_301373	22.52	0	25	0	0.984694	FALSE	0	Peribacillus_301373	118	0.726452			2	0	0.5	1	3	4	FALSE	Bacillus_AD	4.33333	0
3.13675	0.0103428	0.318801	0.756229	55	11	FALSE	Butyrivibrio_A_168226	45.1091	0	55	0	0.96115	FALSE	0	Butyrivibrio_A_168226	30984	0.601455			1.48571	0.000626	0.673077	0.972332	23	4	FALSE	CAG-793	24	0	23	0	0.982653	FALSE	0	CAG-793	14	0.774194			1.57143	0.047619	0.636364	0.833333	4	3	FALSE	Neobacillus	4	0
3.16239	0.0107474	0.316216	0.773585	53	11	FALSE	Christensenella	45.6226	0	53	0	0.960684	FALSE	0	Christensenella	30190	0.616522			2.48571	0.0571429	0.402299	0.714286	7	4	FALSE	Bilifractor	7.42857	0	7	0	0.946939	FALSE	0	Bilifractor	870	0.607143			1.91176	0.00823327	0.523077	0.873684	20	6	FALSE	Massilia	19.1	0
3.19658	0.00667927	0.312834	0.829932	49	11	FALSE	Olsenella_H_405128	47.0204	0	49	0	0.960062	FALSE	0	Olsenella_H_405128	3092	0.61869			1.8	0.0362411	0.555556	0.722222	9	3	FALSE	Raoultibacter	14.3333	0	9	0	0.971429	FALSE	0	Raoultibacter	710	0.434343			1.33333	0	0.75	1	2	2	FALSE	SIO2C1	2.5	0
3.18803	0.00518247	0.313673	0.814118	51	11	FALSE	Berryella	46.7255	0	51	0	0.960218	FALSE	0	Berryella	13640	0.631426			1.25714	0.0878661	0.795455	0.749288	27	3	FALSE	Eubacterium_I	21.7407	0	27	0	0.990816	FALSE	0	Eubacterium_I	1176	0.639434			1	0.666667	1	0.333333	3	1	FALSE	Pelagibacter_A_533952	1.66667	0
3.11111	0.0165024	0.321429	0.777778	54	11	FALSE	Bulleidia	46.037	0	54	0	0.961616	FALSE	0	Bulleidia	38394	0.597884			1.4	0.0441092	0.714286	0.731602	22	3	FALSE	Methanobrevibacter_A	21.5	0	22	0	0.985714	FALSE	0	Methanobrevibacter_A	568	0.632353			2.52174	0.056513	0.396552	0.871795	13	8	FALSE	Eubacterium_Q	14.3846	0
3.1453	0.0108426	0.317935	0.77638	54	11	FALSE	RUG721	45.9259	0	54	0	0.960995	FALSE	0	RUG721	32906	0.612346			1.88571	0.0214154	0.530303	0.785714	8	3	FALSE	Coprococcus_A_187866	12.75	0	8	0	0.968367	FALSE	0	Coprococcus_A_187866	448	0.41129			2	0.142371	0.5	0.764706	18	6	FALSE	Scatoplasma	17.2778	0
4.05882	0.216912	0.246377	0.3	5	9	FALSE	Ruminococcus_F	2.4	0	5	0	0.388235	FALSE	0	Ruminococcus_F	170	0.44			1.45714	0.0487048	0.686275	0.891304	24	4	FALSE	Mogibacterium	23.0417	0	24	0	0.983673	FALSE	0	Mogibacterium	244	0.766667			2.30952	0.0685202	0.43299	0.571429	8	6	FALSE	CAG-873	9.875	0
4.11765	0.0992647	0.242857	0.5	4	9	FALSE	Ruminococcus_C_59129	3	0	4	0	0.376471	FALSE	0	Ruminococcus_C_59129	110	0.5			1.11111	0.106481	0.9	0.75	8	2	FALSE	FD2005	6.375	0	8	0	0.986111	FALSE	0	FD2005	18	0.708333			2.21429	0.0356548	0.451613	0.694444	9	6	FALSE	Phocaeicola_A_858004	13	0
3.20513	0.00340658	0.312	0.859694	49	11	FALSE	FD2005	48.0204	0	49	0	0.959907	FALSE	0	FD2005	13386	0.648924			1.31429	0.0782127	0.76087	0.75	25	3	FALSE	Romboutsia_B	21.8	0	25	0	0.988776	FALSE	0	Romboutsia_B	1072	0.641176			1.80952	0.0866318	0.552632	0.695238	21	5	FALSE	Emergencia	16.5714	0
2.92308	0.0373293	0.342105	0.725689	53	10	FALSE	Clostridium_N_143832	44.3962	0	53	0	0.965035	FALSE	0	Clostridium_N_143832	62786	0.584161			1	0	1	1	3	1	FALSE	UBA1427	3	0	3	0	1	FALSE	0	UBA1427	0	1			2.11905	0.00287922	0.47191	0.9	16	6	FALSE	Bariatricus	18.0625	0
3.17949	0.00545905	0.314516	0.802353	51	11	FALSE	CAG-1427	46.5294	0	51	0	0.960373	FALSE	0	CAG-1427	6136	0.620392			1.37143	0.014335	0.729167	0.916996	23	3	FALSE	CAG-1024	23.5652	0	23	0	0.986735	FALSE	0	CAG-1024	268	0.693095			2.04762	0.00851504	0.488372	0.830065	18	6	FALSE	Ventrisoma	17.7778	0
3.1453	0.00679357	0.317935	0.798643	52	11	FALSE	Copromorpha	46.4423	0	52	0	0.960995	FALSE	0	Copromorpha	13866	0.611083			1.51429	0.00838621	0.660377	0.883117	22	4	FALSE	Stenotrophomonas_A_615274	22.7273	0	22	0	0.981633	FALSE	0	Stenotrophomonas_A_615274	146	0.733138			1.4	0.0611111	0.714286	0.761905	7	3	FALSE	WG-1	5.85714	0
2.90598	0.0434979	0.344118	0.711785	55	10	FALSE	RUG705	43.8727	0	55	0	0.965346	FALSE	0	RUG705	63368	0.577273			1.45714	0.00448513	0.686275	0.916667	24	4	FALSE	JC017	23.2917	0	24	0	0.983673	FALSE	0	JC017	52	0.751344			1.90476	0.0377485	0.525	0.680952	21	6	FALSE	Harryflintia	16.5238	0
2.94017	0.052263	0.340116	0.72898	50	10	FALSE	Scybalousia	44.4	0	50	0	0.964724	FALSE	0	Scybalousia	104114	0.584211			1.77143	0.0503611	0.564516	0.644444	10	3	FALSE	Adlercreutzia_404199	15	0	10	0	0.972449	FALSE	0	Adlercreutzia_404199	920	0.454545			1.69048	0.311499	0.591549	0.505929	23	5	FALSE	UBA7173	14.5652	0
3.42735	0.0170746	0.291771	0.691176	17	10	FALSE	BICA1-8	34.5882	0	17	0	0.955866	FALSE	0	BICA1-8	27226	0.557875			1	0	1	1	2	1	FALSE	UBA1067	2	0	2	0	1	FALSE	0	UBA1067	0	1			2.07143	0.00527661	0.482759	0.849673	18	6	FALSE	CAG-177	17.6667	0
3.16239	0.211769	0.316216	0.639706	17	9	FALSE	Eubacterium_T	29	0	17	0	0.960684	FALSE	0	Eubacterium_T	345968	0.453125			1	0	1	1	2	1	FALSE	Christensenella	2	0	2	0	1	FALSE	0	Christensenella	0	1			2	0.0130332	0.5	0.768421	20	6	FALSE	Intestinimonas	17	0
3.35897	0.00273273	0.29771	0.927454	38	11	FALSE	Acinetobacter	49.6579	0	38	0	0.95711	FALSE	0	Acinetobacter	728	0.689693			1.44444	0	0.692308	1	6	3	FALSE	UMGS1994	7.33333	0	6	0	0.944444	FALSE	0	UMGS1994	0	0.916667			2.71739	0.0174335	0.368	0.769231	13	8	FALSE	CAG-307	13.3846	0
3.17094	0.00610981	0.315364	0.780543	52	11	FALSE	Nanosyncoccus	45.8654	0	52	0	0.960528	FALSE	0	Nanosyncoccus	6294	0.611538			1.48571	0.00459417	0.673077	0.936759	23	4	FALSE	Psychrobacillus	23.4348	0	23	0	0.982653	FALSE	0	Psychrobacillus	170	0.755961			2.67391	0.0201507	0.373984	0.769231	14	8	FALSE	UBA1402	13.3571	0
3.82906	0.0065213	0.261161	0.842857	21	12	FALSE	Turicibacter	41.4762	0	21	0	0.948563	FALSE	0	Turicibacter	42154	0.668971			2.17143	0	0.460526	1	9	5	FALSE	Flavobacterium	23.5556	0	9	0	0.958163	FALSE	0	Flavobacterium	0	0.942222			1.90476	0.0340895	0.525	0.704762	21	6	FALSE	Anaerotignum_189125	16.5714	0
3.64103	0.0145229	0.274648	0.810753	31	12	FALSE	Romboutsia_B	43.7419	0	31	0	0.951981	FALSE	0	Romboutsia_B	84396	0.624885			1.22222	0.00925926	0.818182	0.952381	7	2	FALSE	Choladousia	7.14286	0	7	0	0.972222	FALSE	0	Choladousia	4	0.793651			2.21429	0.00374537	0.451613	0.852941	17	6	FALSE	Lawsonibacter	17.3529	0
3.18803	0.00936894	0.313673	0.800784	51	11	FALSE	Saccharofermentans	46.4118	0	51	0	0.960218	FALSE	0	Saccharofermentans	28224	0.635778			2.51429	0	0.397727	1	6	4	FALSE	Bulleidia	8.66667	0	6	0	0.945918	FALSE	0	Bulleidia	0	0.666667			2.11905	0.00287922	0.47191	0.9	16	6	FALSE	Blautia_A_141781	18.0625	0
3.15385	0.0148253	0.317073	0.799216	51	11	FALSE	QAMH01	46.2941	0	51	0	0.960839	FALSE	0	QAMH01	23274	0.601222			2.05714	0.00738295	0.486111	0.6	5	4	FALSE	UBA3789	20.6	0	5	0	0.962245	FALSE	0	UBA3789	76	0.728571			1.76471	0.112908	0.566667	0.808824	17	5	FALSE	Paracoccus	18.4706	0
3.15385	0.00794394	0.317073	0.819608	51	11	FALSE	Eubacterium_I	47.0784	0	51	0	0.960839	FALSE	0	Eubacterium_I	18796	0.619453			1.22222	0.222222	0.818182	0.714286	7	2	FALSE	CAG-1427	6.42857	0	7	0	0.972222	FALSE	0	CAG-1427	28	0.785714			1.97059	0.0552805	0.507463	0.818182	11	5	FALSE	Rothia	18	0
3.16239	0.00869678	0.316216	0.779035	52	11	FALSE	Slackia_A	45.8846	0	52	0	0.960684	FALSE	0	Slackia_A	9958	0.603745			1.5	0.2	0.666667	0.666667	3	2	FALSE	Marvinbryantia	3.33333	0	3	0	0.875	FALSE	0	Marvinbryantia	12	0.555556			1	0.583333	1	0.333333	4	1	FALSE	Fusobacterium_A	2	0
8.73504	9.82e-05	0.114481	0.833333	4	14	FALSE	Mailhella	4	0	4	0	0.859363	FALSE	0	Mailhella	4	0.666667			1.5	0.2	0.666667	0.666667	3	2	FALSE	Streptococcus	3.33333	0	3	0	0.875	FALSE	0	Streptococcus	12	0.555556			1.25	0.0833333	0.8	0.666667	3	2	FALSE	Fusobacterium_B	2.66667	0
7.77778	0.0826211	0.128571	0.5	5	13	FALSE	Phascolarctobacterium_A	3.6	0	5	0	0.876768	FALSE	0	Phascolarctobacterium_A	80604	0.485714			1.97143	9.34e-05	0.507246	0.964286	8	4	FALSE	Escherichia_710834	24.375	0	8	0	0.965306	FALSE	0	Escherichia_710834	2	0.840517			2.43478	0.17099	0.410714	0.685714	15	8	FALSE	1XD42-69	12.9333	0
3.13675	0.0153829	0.318801	0.756322	30	10	FALSE	Bariatricus	41.3667	0	30	0	0.96115	FALSE	0	Bariatricus	23668	0.566667			1.33333	0.666667	0.75	0	2	2	FALSE	Anaeroplasma	1.5	0	2	0	0.833333	FALSE	0	Anaeroplasma	4	0.5			2.47826	0.142264	0.403509	0.625	16	7	FALSE	Prevotella	12.125	0
3.68376	0.0427277	0.271462	0.740741	27	12	FALSE	CAG-793	40.5556	0	27	0	0.951204	FALSE	0	CAG-793	93260	0.587762			1.33333	0.666667	0.75	0	2	2	FALSE	CAG-307	1.5	0	2	0	0.833333	FALSE	0	CAG-307	4	0.5			2.47826	0.118002	0.403509	0.641667	16	7	FALSE	F0058	12.25	0
2.92308	0.0589798	0.342105	0.774118	51	10	FALSE	Mogibacterium	45.9216	0	51	0	0.965035	FALSE	0	Mogibacterium	115392	0.596384			2.51429	0	0.397727	1	6	4	FALSE	UBA636	8.66667	0	6	0	0.945918	FALSE	0	UBA636	0	0.666667			1.42857	0.333333	0.7	0.5	5	3	FALSE	Solibacillus	3.2	0
4.1453	0	0.241237	1	5	12	FALSE	UBA636	26	0	5	0	0.942813	FALSE	0	UBA636	0	0.52			1.83333	0.333333	0.545455	0.333333	3	3	FALSE	Ruminococcus_C_58660	2.33333	0	3	0	0.791667	FALSE	0	Ruminococcus_C_58660	16	0.666667			2.63043	0.0781662	0.380165	0.616667	16	8	FALSE	CAG-196	12	0
3.82051	0.00158207	0.261745	0.757353	17	12	FALSE	Methanobrevibacter_A	40.7059	0	17	0	0.948718	FALSE	0	Methanobrevibacter_A	382	0.60755			1.22222	0.00925926	0.818182	0.952381	7	2	FALSE	Eubacterium_R	7.14286	0	7	0	0.972222	FALSE	0	Eubacterium_R	4	0.793651			2.67391	0.0262384	0.373984	0.769231	14	8	FALSE	Enterousia	13.2857	0
3.21368	0.00242113	0.31117	0.84949	49	11	FALSE	Hornefia	47.7755	0	49	0	0.959751	FALSE	0	Hornefia	1414	0.645615			1.22222	0.00925926	0.818182	0.952381	7	2	FALSE	CAG-269	7.14286	0	7	0	0.972222	FALSE	0	CAG-269	4	0.793651			2.08824	0.00906276	0.478873	0.882353	17	6	FALSE	Adlercreutzia_404257	19.0588	0
2.5	0	0.4	0	1	4	FALSE	Escherichia_710834	3	0	1	0	0.5	FALSE	0	Escherichia_710834	0	0			1.71429	0.0872679	0.583333	0.575758	12	3	FALSE	Thermophilibacter	16.4167	0	12	0	0.97449	FALSE	0	Thermophilibacter	1408	0.497475			2.26667	0.247619	0.441176	0.333333	3	4	FALSE	Methanosphaera	3.66667	0
1.66667	0.6	0.6	0	3	3	FALSE	Eubacterium_Q	1.66667	0	3	0	0.777778	FALSE	0	Eubacterium_Q	18	0.333333			1	0	1	0	1	1	FALSE	UBA6984	1	0	1	0	1	FALSE	0	UBA6984	0	0			3.13333	0	0.319149	1	2	5	FALSE	Longicatena	2.5	0
3.19658	0.0112099	0.312834	0.713333	25	10	FALSE	RUG12438	37.88	0	25	0	0.960062	FALSE	0	RUG12438	10176	0.533521			1	0	1	0	1	1	FALSE	UBA2813	1	0	1	0	1	FALSE	0	UBA2813	0	0			1.95238	0.0383725	0.512195	0.660819	19	6	FALSE	CAG-1000	16.4211	0
3.21368	0.00872622	0.31117	0.805851	48	11	FALSE	UBA3789	47.0417	0	48	0	0.959751	FALSE	0	UBA3789	18800	0.644406			2	0	0.5	0	1	3	FALSE	UBA71	2	0	1	0	0.5	FALSE	0	UBA71	0	0			2	0.0822455	0.5	0.558333	16	6	FALSE	Gabonibacter	15.1875	0
5.36752	0.270921	0.186306	0.3	5	10	FALSE	Paramuribaculum	4	0	5	0	0.920591	FALSE	0	Paramuribaculum	369846	0.36			2	0	0.5	0	1	3	FALSE	RUG350	2	0	1	0	0.5	FALSE	0	RUG350	0	0			3.83333	0	0.26087	1	2	8	FALSE	UBA5905	2.5	0
4.75214	0.338933	0.210432	0.5	4	9	FALSE	UBA71	3.75	0	4	0	0.931779	FALSE	0	UBA71	514304	0.5			1	0	1	0	1	1	FALSE	Cellulosilyticum	1	0	1	0	1	FALSE	0	Cellulosilyticum	0	0			2.88095	0.0929152	0.347107	0.333333	3	7	FALSE	UBA3207	7.33333	0
3.18803	0.0073984	0.313673	0.811429	50	11	FALSE	RUG13615	46.68	0	50	0	0.960218	FALSE	0	RUG13615	3618	0.614211			1	0	1	0	1	1	FALSE	UBA2212	1	0	1	0	1	FALSE	0	UBA2212	0	0			1.6	0.607937	0.625	0.238095	7	3	FALSE	Muricomes_149725	3.71429	0
3.52991	0.0224961	0.283293	0.6	6	9	FALSE	JC017	14.5	0	6	0	0.954002	FALSE	0	JC017	8896	0.381579			1	0	1	1	2	1	FALSE	Terrisporobacter	2	0	2	0	1	FALSE	0	Terrisporobacter	0	1			2	0.103175	0.5	0.4	5	3	FALSE	Bilifractor	4	0
3.64103	0.358713	0.274648	0.4	5	8	FALSE	Anaerofustis	8.4	0	5	0	0.951981	FALSE	0	Anaerofustis	546352	0.41			1	0	1	0	1	1	FALSE	Anaerosacchariphilus	1	0	1	0	1	FALSE	0	Anaerosacchariphilus	0	0			2.2381	0.00266224	0.446809	0.883333	16	6	FALSE	Clostridium_Q_135822	17.6875	0
3.19658	0.00492416	0.312834	0.867633	46	11	FALSE	Thermophilibacter	48.2174	0	46	0	0.960062	FALSE	0	Thermophilibacter	13014	0.634439			1	0	1	0	1	1	FALSE	Solibacillus	1	0	1	0	1	FALSE	0	Solibacillus	0	0			1.33333	0	0.75	1	2	2	FALSE	Alteromonas_F	2.5	0
3.19658	0.155985	0.312834	0.637363	14	9	FALSE	UBA4285	27	0	14	0	0.960062	FALSE	0	UBA4285	240552	0.428571			1	0	1	0	1	1	FALSE	Dysosmobacter	1	0	1	0	1	FALSE	0	Dysosmobacter	0	0			1.9	0.00555556	0.526316	0.9	5	4	FALSE	UBA1427	6.2	0
3.17094	0.00931979	0.315364	0.815686	51	11	FALSE	Frigoribacterium	46.8431	0	51	0	0.960528	FALSE	0	Frigoribacterium	27806	0.624575			1	0	1	0	1	1	FALSE	Lawsonibacter	1	0	1	0	1	FALSE	0	Lawsonibacter	0	0			2.20588	0.00482644	0.453333	0.897436	13	6	FALSE	Collinsella	18.7692	0
3.64957	0.0144565	0.274005	0.857471	30	12	FALSE	Methylobacterium	45.8	0	30	0	0.951826	FALSE	0	Methylobacterium	87638	0.654286			1.5	0.6	0.666667	0.166667	4	3	FALSE	BICA1-8	2	0	4	0	0.875	FALSE	0	BICA1-8	26	0.5			3.41304	0.00172686	0.292994	0.8	5	9	FALSE	UBA1067	12.8	0
3.59829	0.0212548	0.27791	0.818487	35	12	FALSE	Choladousia	45.2857	0	35	0	0.952758	FALSE	0	Choladousia	107538	0.637827			2.33333	0	0.428571	0	1	4	FALSE	Limiplasma	4	0	1	0	0.666667	FALSE	0	Limiplasma	0	0			3.56522	0	0.280488	1	3	9	FALSE	Butyribacter	11.6667	0
4.60684	0	0.217069	1	2	12	FALSE	Adlercreutzia_404199	6	0	2	0	0.934421	FALSE	0	Adlercreutzia_404199	0	0.6			1	0	1	0	1	1	FALSE	CAG-196	1	0	1	0	1	FALSE	0	CAG-196	0	0			2.09524	0.0887017	0.477273	0.538462	13	6	FALSE	Paludicola	13.7692	0
4.60684	0	0.217069	1	2	12	FALSE	UBA9715	6	0	2	0	0.934421	FALSE	0	UBA9715	0	0.6			1	0	1	0	1	1	FALSE	UBA1436	1	0	1	0	1	FALSE	0	UBA1436	0	0			1	0	1	0	1	1	FALSE	Butyricicoccus_A_77030	1	0
3.82906	0.000943	0.261161	0.931579	20	12	FALSE	UBA1066	48.95	0	20	0	0.948563	FALSE	0	UBA1066	234	0.753077			3.45714	0	0.289256	0	1	5	FALSE	DSXL01	7	0	1	0	0.912245	FALSE	0	DSXL01	0	0			1	0	1	0	1	1	FALSE	Roseburia	1	0
6.94017	0.00877296	0.144089	0.5	4	12	FALSE	43-108	5	0	4	0	0.891997	FALSE	0	43-108	16142	0.454545			1.88889	0	0.529412	1	2	3	FALSE	Neobittarella	8	0	2	0	0.888889	FALSE	0	Neobittarella	0	1			2.35714	0.000612	0.424242	0.933333	6	6	FALSE	CAG-605	15	0
6.01709	0.265267	0.166193	0.142857	7	11	FALSE	UBA1436	4	0	7	0	0.90878	FALSE	0	UBA1436	338126	0.238095			1	0	1	0	1	1	FALSE	UBA3830	1	0	1	0	1	FALSE	0	UBA3830	0	0			2.11765	0.0626222	0.472222	0.6	10	5	FALSE	Rubellimicrobium	15.6	0
3.28205	0.00111681	0.304688	0.924506	42	11	FALSE	Coprococcus_A_187866	49.7381	0	42	0	0.958508	FALSE	0	Coprococcus_A_187866	818	0.681344			1	0	1	0	1	1	FALSE	Zag111	1	0	1	0	1	FALSE	0	Zag111	0	0			2.47059	0.0181394	0.404762	0.5	4	5	FALSE	QKMZ01	7.75	0
4.94118	0	0.202381	1	2	10	FALSE	COE1	4.5	0	2	0	0.211765	FALSE	0	COE1	0	0.9			2.37143	0.000336	0.421687	0	2	5	FALSE	Coprosoma	14.5	0	2	0	0.95102	FALSE	0	Coprosoma	2	0.586957			2.52174	0.108049	0.396552	0.692308	14	7	FALSE	Caproicibacterium	12.7857	0
1.33333	0.666667	0.75	0	2	2	FALSE	QAMM01	1.5	0	2	0	0.833333	FALSE	0	QAMM01	4	0.5			2.11111	0	0.473684	0	1	3	FALSE	Suipraeoptans	7	0	1	0	0.861111	FALSE	0	Suipraeoptans	0	0			2.4	0	0.416667	1	2	4	FALSE	Treponema_F	6	0
2	0	0.5	0	1	3	FALSE	UBA1248	2	0	1	0	0.5	FALSE	0	UBA1248	0	0			1	0	1	0	1	1	FALSE	UBA1254	1	0	1	0	1	FALSE	0	UBA1254	0	0			2.42857	0.00290109	0.411765	0.878788	12	6	FALSE	Choladousia	17.75	0
3.81197	0.00218145	0.262332	0.793478	24	12	FALSE	RUG13038	42.9167	0	24	0	0.948873	FALSE	0	RUG13038	508	0.660256			1	0	1	0	1	1	FALSE	Spyradosoma	1	0	1	0	1	FALSE	0	Spyradosoma	0	0			1.97619	0.0204673	0.506024	0.766082	19	6	FALSE	Anaerobutyricum	17.1579	0
8.73504	9.82e-05	0.114481	0.833333	4	14	FALSE	Phocaeicola_A_858004	4	0	4	0	0.859363	FALSE	0	Phocaeicola_A_858004	4	0.666667			1	0	1	0	1	1	FALSE	RUG705	1	0	1	0	1	FALSE	0	RUG705	0	0			3.29412	0.114082	0.303571	0	2	6	FALSE	WRAI01	3	0
3.62393	0.034193	0.275943	0.577778	10	11	FALSE	Parafannyhessea	34.1	0	10	0	0.952292	FALSE	0	Parafannyhessea	4200	0.524615			1	0	1	0	1	1	FALSE	RUG12438	1	0	1	0	1	FALSE	0	RUG12438	0	0			4.20588	0.0588235	0.237762	0	2	7	FALSE	UBA2253	1.5	0
1	0	1	0	1	1	FALSE	Frisingicoccus	1	0	1	0	1	FALSE	0	Frisingicoccus	0	0			2.33333	0	0.428571	0	1	4	FALSE	SFMI01	4	0	1	0	0.666667	FALSE	0	SFMI01	0	0			2.38095	0	0.42	1	9	6	FALSE	CAG-194	18.6667	0
1	0	1	0	1	1	FALSE	Onthenecus	1	0	1	0	1	FALSE	0	Onthenecus	0	0			1	0	1	0	1	1	FALSE	Eubacterium_S	1	0	1	0	1	FALSE	0	Eubacterium_S	0	0			2.2619	0.00099	0.442105	0.935897	13	6	FALSE	UMGS1071	18.4615	0
3.53846	0.00108368	0.282609	0.861111	9	10	FALSE	Faecisoma	33.6667	0	9	0	0.953846	FALSE	0	Faecisoma	92	0.570621			1	0	1	0	1	1	FALSE	Breznakia	1	0	1	0	1	FALSE	0	Breznakia	0	0			2.09091	0	0.478261	1	2	3	FALSE	Terrisporobacter	5	0
3.70085	0.0174246	0.270208	0.84	25	12	FALSE	Shuttleworthia	46.72	0	25	0	0.950894	FALSE	0	Shuttleworthia	20980	0.676522			2.66667	0	0.375	0	1	4	FALSE	Mobilisporobacter	3	0	1	0	0.583333	FALSE	0	Mobilisporobacter	0	0			1.81818	0.472727	0.55	0.166667	4	3	FALSE	UBA1413	2.75	0
1	0	1	1	2	1	FALSE	Marseille-P2935	2	0	2	0	1	FALSE	0	Marseille-P2935	0	1																							1.57143	0.047619	0.636364	0.833333	4	3	FALSE	Clostridium_T	4	0
1	0	1	1	2	1	FALSE	Faecousia	2	0	2	0	1	FALSE	0	Faecousia	0	1																							1	0	1	0	1	1	FALSE	Turicibacter	1	0
3.4359	0.0078416	0.291045	0.897436	27	11	FALSE	Anaerobutyricum	47.1481	0	27	0	0.955711	FALSE	0	Anaerobutyricum	2422	0.673545																							1	0	1	0	1	1	FALSE	Clostridioides_A	1	0
4.07692	0.017094	0.245283	0.5	4	10	FALSE	Emergencia	10.25	0	4	0	0.944056	FALSE	0	Emergencia	21394	0.5																							2.58696	0.127383	0.386555	0.558824	17	8	FALSE	Scatocola	11.4706	0
6.36752	0	0.157047	1	2	15	FALSE	Massilioclostridium	2.5	0	2	0	0.902409	FALSE	0	Massilioclostridium	0	0.833333																							1.42857	0.47619	0.7	0.5	4	2	FALSE	Eubacterium_R	3.75	0
5.38462	0.0338933	0.185714	0.333333	3	14	FALSE	Clostridioides_A	3.66667	0	3	0	0.92028	FALSE	0	Clostridioides_A	190508	0.416667																							2.76471	0	0.361702	1	5	7	FALSE	JC017	17.6	0
4.35294	0	0.22973	1	2	8	FALSE	Onthomonas	3	0	2	0	0.329412	FALSE	0	Onthomonas	0	0.75																							2.13333	0.149206	0.46875	0.333333	4	4	FALSE	Thermophilibacter	4	0
4.23529	0.220588	0.236111	0.333333	3	8	FALSE	Solibacillus	2.33333	0	3	0	0.352941	FALSE	0	Solibacillus	148	0.5																							2.67391	0.0140653	0.373984	0.791209	14	8	FALSE	Mobilitalea	13.5714	0
6.36752	0	0.157047	1	2	15	FALSE	Terrisporobacter	2.5	0	2	0	0.902409	FALSE	0	Terrisporobacter	0	0.833333																							3.28261	0.000644	0.304636	0.8	5	8	FALSE	CAG-267	12.6	0
3.36752	0.0101161	0.296954	0.879365	36	11	FALSE	CACXMZ01	48.0278	0	36	0	0.956954	FALSE	0	CACXMZ01	4422	0.676448																							5.83333	0	0.171429	0	1	8	FALSE	Slackia_A	2	0
3.64957	0.00461525	0.274005	0.782531	34	12	FALSE	Devosia_A_502124	43.0882	0	34	0	0.951826	FALSE	0	Devosia_A_502124	1044	0.633651																							4.85714	0.047619	0.205882	0	2	7	FALSE	Breznakia	1.5	0
4.03419	0.000173	0.247881	0.904762	7	12	FALSE	Coprosoma	29.8571	0	7	0	0.944833	FALSE	0	Coprosoma	26	0.52381																							1.9	0.00555556	0.526316	0.9	5	4	FALSE	UBA1436	6.2	0
7.88034	0.017094	0.126898	0.333333	3	13	FALSE	CAG-1000	3.66667	0	3	0	0.874903	FALSE	0	CAG-1000	16136	0.555556																							1.3	0.472222	0.769231	0.47619	7	2	FALSE	Coprosoma	5.28571	0
7.86325	0.000516	0.127174	0.5	4	13	FALSE	Soleaferrea	3.75	0	4	0	0.875214	FALSE	0	Soleaferrea	16	0.46875																							1.6	0.0222222	0.625	0.9	5	3	FALSE	Ruminococcus_E	6.6	0
3.18803	0.0115776	0.313673	0.803333	25	10	FALSE	CAG-269	43.64	0	25	0	0.960218	FALSE	0	CAG-269	21530	0.606111																							1	0	1	0	1	1	FALSE	Limenecus	1	0
1	0	1	1	2	1	FALSE	Limenecus	2	0	2	0	1	FALSE	0	Limenecus	0	1																							1	0	1	0	1	1	FALSE	UBA6984	1	0
1	0	1	1	2	1	FALSE	Zag111	2	0	2	0	1	FALSE	0	Zag111	0	1																							1.76471	0.275926	0.566667	0.666667	15	4	FALSE	Corynebacterium	16.9333	0
2	0	0.5	0	1	3	FALSE	Kineothrix	2	0	1	0	0.5	FALSE	0	Kineothrix	0	0																							3.04348	0.0164274	0.328571	0.666667	7	7	FALSE	43-108	11.8571	0
1.33333	0.666667	0.75	0	2	2	FALSE	Streptococcus	1.5	0	2	0	0.833333	FALSE	0	Streptococcus	4	0.5																							2.30952	0.111896	0.43299	0.5	4	4	FALSE	Cryptobacteroides	13.25	0
3.37607	0.002726	0.296203	0.889706	17	10	FALSE	RUG410	41.2353	0	17	0	0.956799	FALSE	0	RUG410	4562	0.644301																							2.35714	0.141913	0.424242	0.3	5	4	FALSE	Faecalibacterium	6.8	0
7.90598	0	0.126486	0	1	13	FALSE	CAG-964	6	0	1	0	0.874437	FALSE	0	CAG-964	0	0																							2.18182	0.181818	0.458333	0.333333	3	4	FALSE	QALR01	3.66667	0
6.91453	0.074413	0.144623	0.266667	6	12	FALSE	CAG-914	3.5	0	6	0	0.892463	FALSE	0	CAG-914	80616	0.30303																							2	0.0545455	0.5	0.666667	4	4	FALSE	RUG13077	4	0
3.11966	0.0936599	0.320548	0.664368	30	10	FALSE	Paraeggerthella	39.4333	0	30	0	0.961461	FALSE	0	Paraeggerthella	39594	0.532432																							3.32609	0	0.300654	1	3	8	FALSE	Zag111	12.6667	0
4.01709	0	0.248936	1	8	12	FALSE	Methanobrevibacter_D_1148	43.5	0	8	0	0.945144	FALSE	0	Methanobrevibacter_D_1148	0	0.75																							1.9	0.0888889	0.526316	0.666667	3	3	FALSE	G11	4	0
8.75214	0	0.114258	1	3	14	FALSE	Gallalistipes	4.33333	0	3	0	0.859052	FALSE	0	Gallalistipes	0	0.866667																							2.91304	0.268406	0.343284	0.392857	8	9	FALSE	UBA1394	9.25	0
3.88889	0.000201	0.257143	0.900585	19	12	FALSE	Nitrosocosmicus	45.5789	0	19	0	0.947475	FALSE	0	Nitrosocosmicus	78	0.735144																							3.78261	0.0439614	0.264368	0.333333	4	10	FALSE	C-53	4.25	0
3.57265	0.000113	0.279904	0.935897	13	11	FALSE	CAG-302	47.6923	0	13	0	0.953225	FALSE	0	CAG-302	54	0.701357																							1.54545	0.6	0.647059	0.333333	6	3	FALSE	PeH17	3.33333	0
2.94118	0.514706	0.34	0.5	4	6	FALSE	Reyranella	4.25	0	4	0	0.611765	FALSE	0	Reyranella	432	0.666667																							2.09091	0.181818	0.478261	0.5	4	4	FALSE	Stercorousia	3.5	0
1	0	1	0	1	1	FALSE	Eubacterium_N	1	0	1	0	1	FALSE	0	Eubacterium_N	0	0																							2.18182	0	0.458333	1	3	4	FALSE	CAG-314	4.66667	0
1	0	1	0	1	1	FALSE	Evtepia	1	0	1	0	1	FALSE	0	Evtepia	0	0																							3.02174	0.0142029	0.330935	0.7	5	8	FALSE	Bacteroides_H	13	0
3.52941	0.441176	0.283333	0.333333	3	8	FALSE	CAG-353	3.66667	0	3	0	0.494118	FALSE	0	CAG-353	364	0.555556																							1.9	0.0888889	0.526316	0.666667	3	3	FALSE	RUG762	4	0
4.42735	0.0514874	0.225869	0.52381	7	13	FALSE	Neorhizobium	21.4286	0	7	0	0.937685	FALSE	0	Neorhizobium	285928	0.483766																							2.33333	0.000713	0.428571	0.933333	6	6	FALSE	Limiplasma	14.6667	0
4.62393	0.017094	0.216266	0.333333	3	13	FALSE	Flexilinea	11.6667	0	3	0	0.93411	FALSE	0	Flexilinea	16298	0.404762																							3.02174	0.263768	0.330935	0.6	5	7	FALSE	RF16	11	0
1.5	0	0.666667	0	1	2	FALSE	Gabonibacter	2	0	1	0	0.75	FALSE	0	Gabonibacter	0	0																							3.83333	0	0.26087	1	2	8	FALSE	Adlercreutzia_404199	2.5	0
1	1	1	0	2	1	FALSE	Acutalibacter	1	0	2	0	1	FALSE	0	Acutalibacter	2	0																							1.5	0	0.666667	1	2	2	FALSE	Peptostreptococcus	3.5	0
9.7265	0	0.102812	0	1	15	FALSE	CAG-873	4	0	1	0	0.841336	FALSE	0	CAG-873	0	0																							4.28261	0	0.233503	0	1	10	FALSE	CAG-273	4	0
8.73504	0.017094	0.114481	0.5	4	14	FALSE	Alistipes_A_871400	3.5	0	4	0	0.859363	FALSE	0	Alistipes_A_871400	16132	0.65																							3.30435	0.0859903	0.302632	0.166667	4	9	FALSE	Ruthenibacterium	5.5	0
1.5	0	0.666667	0	1	2	FALSE	2024-02-14	2	0	1	0	0.75	FALSE	0	2024-02-14	0	0																							2.44118	0.219251	0.409639	0.166667	4	5	FALSE	Acinetobacter	5.5	0
1	0	1	1	2	1	FALSE	UBA6984	2	0	2	0	1	FALSE	0	UBA6984	0	1																							2.6	0.133333	0.384615	0.333333	3	4	FALSE	Bulleidia	3.33333	0
4.29915	0	0.232604	1	2	12	FALSE	Limivicinus	31.5	0	2	0	0.940016	FALSE	0	Limivicinus	0	0.828947																							2	0.209524	0.5	0.333333	4	3	FALSE	CAG-95	4	0
5.06838	0	0.197302	0	1	12	FALSE	PeH17	3	0	1	0	0.92603	FALSE	0	PeH17	0	0																							3.06667	0	0.326087	0	1	5	FALSE	Mediterraneibacter_A_155507	4	0
4.07692	0.0340407	0.245283	0	3	11	FALSE	RUG13077	10.6667	0	3	0	0.944056	FALSE	0	RUG13077	7414	0.333333																							2.97619	0	0.336	0	1	7	FALSE	Fimenecus	16	0
3.93162	0.017094	0.254348	0.333333	3	9	FALSE	Schaedlerella	6.66667	0	3	0	0.946698	FALSE	0	Schaedlerella	7026	0.422222																							3.13333	0	0.319149	1	2	5	FALSE	Clostridium_P	2.5	0
1.5	0	0.666667	0	1	2	FALSE	Bacillus_AD	2	0	1	0	0.75	FALSE	0	Bacillus_AD	0	0																							2	0.285714	0.5	0	2	3	FALSE	Oscillibacter	2.5	0
1	1	1	0	2	1	FALSE	RUG12783	1	0	2	0	1	FALSE	0	RUG12783	2	0																							2.61905	0	0.381818	1	8	7	FALSE	Faecalimonas	18.625	0
1	1	1	0	2	1	FALSE	Treponema_D	1	0	2	0	1	FALSE	0	Treponema_D	2	0																							3.47826	0.00193237	0.2875	0.666667	4	9	FALSE	Alistipes_A_871400	11.75	0
1.5	0	0.666667	0	1	2	FALSE	UBA3402	2	0	1	0	0.75	FALSE	0	UBA3402	0	0																							2.38235	0.000608	0.419753	0.933333	6	6	FALSE	Sphingomonas_L_486704	19.5	0
6.35897	0	0.157258	0	1	11	FALSE	Ventrisoma	5	0	1	0	0.902564	FALSE	0	Ventrisoma	0	0																							1.5	0	0.666667	1	2	2	FALSE	Peptacetobacter	3.5	0
5.51282	0.0184694	0.181395	0.666667	4	10	FALSE	UBA1732	4.5	0	4	0	0.917949	FALSE	0	UBA1732	48230	0.5																							3.92857	0.0929152	0.254545	0	2	6	FALSE	UBA3789	3	0
5.05882	0.117647	0.197674	0	2	9	FALSE	C-53	2	0	2	0	0.188235	FALSE	0	C-53	76	0.5																							3.04762	0.137112	0.328125	0.333333	4	5	FALSE	CAG-269	3.25	0
6.95726	0.000403	0.143735	0.666667	3	12	FALSE	Victivallis	5.33333	0	3	0	0.891686	FALSE	0	Victivallis	16	0.484848																							2.91176	0	0.343434	1	2	6	FALSE	Methylobacterium	7	0
5.51282	0.0184694	0.181395	0.666667	4	10	FALSE	Longicatena	4.5	0	4	0	0.917949	FALSE	0	Longicatena	48230	0.5																							1.93333	0.187302	0.517241	0.4	5	3	FALSE	RUG131	4.2	0
6.97436	0.0159151	0.143382	0	2	12	FALSE	Mobilisporobacter	5	0	2	0	0.891375	FALSE	0	Mobilisporobacter	32220	0.571429																							3.88095	0	0.257669	0	1	8	FALSE	Dysosmobacter	5	0
3.48718	0.000619	0.286765	0.902174	24	11	FALSE	UMGS1449	49.5833	0	24	0	0.954779	FALSE	0	UMGS1449	834	0.718599																							2.90476	0.0940767	0.344262	0.3	5	7	FALSE	Scatomonas	6.4	0
1	1	1	0	2	1	FALSE	Harryflintia	1	0	2	0	1	FALSE	0	Harryflintia	2	0																							3.2381	0	0.308824	1	2	5	FALSE	Caproiciproducens	4.5	0
1.5	0	0.666667	0	1	2	FALSE	Oscillibacter	2	0	1	0	0.75	FALSE	0	Oscillibacter	0	0																							1.6	0.0222222	0.625	0.9	5	3	FALSE	UBA737	6.6	0
3.58824	0.382353	0.278689	0.333333	3	7	FALSE	ZJ304	3.33333	0	3	0	0.482353	FALSE	0	ZJ304	280	0.428571																							3.47826	0	0.2875	1	2	8	FALSE	Victivallis	10.5	0
1.5	0	0.666667	0	1	2	FALSE	F0058	2	0	1	0	0.75	FALSE	0	F0058	0	0																							2.58824	0.114082	0.386364	0.333333	3	6	FALSE	BICA1-8	10	0
6.15385	0.0292563	0.1625	0.2	5	11	FALSE	CAG-267	3.8	0	5	0	0.906294	FALSE	0	CAG-267	64456	0.36																							1.33333	0	0.75	1	2	2	FALSE	Roseomonas_A_507160	2.5	0
1	0	1	0	1	1	FALSE	Monoglobus	1	0	1	0	1	FALSE	0	Monoglobus	0	0																							1	0.666667	1	0.333333	3	1	FALSE	UMGS2069	1.66667	0
1	0	1	0	1	1	FALSE	Parabacteroides_B_862066	1	0	1	0	1	FALSE	0	Parabacteroides_B_862066	0	0																							1.5	0	0.666667	0	1	2	FALSE	Eubacterium_S	2	0
1	0	1	0	1	1	FALSE	GWE2-31-10	1	0	1	0	1	FALSE	0	GWE2-31-10	0	0																							1	1	1	0	2	1	FALSE	QAKW01	1	0
1	0	1	0	1	1	FALSE	Pygmaiobacter	1	0	1	0	1	FALSE	0	Pygmaiobacter	0	0																							3.73913	0.231884	0.267442	0	2	8	FALSE	Anaerosacchariphilus	4	0
1.83333	0.333333	0.545455	0.333333	3	3	FALSE	Mobilitalea	2	0	3	0	0.722222	FALSE	0	Mobilitalea	10	0.555556																							2.59524	0.000949	0.385321	0.9	5	7	FALSE	Faecimonas	16.8	0
2	0	0.5	1	2	3	FALSE	CAG-475	3	0	2	0	0.666667	FALSE	0	CAG-475	0	0.75																							3.5	0.0588235	0.285714	0	2	7	FALSE	Pradoshia	2	0
1.5	0	0.666667	0	1	2	FALSE	RUG350	2	0	1	0	0.75	FALSE	0	RUG350	0	0																							3.33333	0	0.3	0	1	5	FALSE	Pelethenecus	5	0
1	0	1	0	1	1	FALSE	Ruminococcus_D	1	0	1	0	1	FALSE	0	Ruminococcus_D	0	0																							1.66667	0	0.6	0	1	2	FALSE	RUG13038	3	0
1	0	1	0	1	1	FALSE	WRAY01	1	0	1	0	1	FALSE	0	WRAY01	0	0																							3.13043	0.0569726	0.319444	0.4	5	9	FALSE	UBA71	8.8	0
3.17647	0.485294	0.314815	0	2	7	FALSE	Corynebacterium	3.5	0	2	0	0.564706	FALSE	0	Corynebacterium	400	0.5																							1	0	1	0	1	1	FALSE	UBA3830	1	0
6.87179	0.114058	0.145522	0	3	12	FALSE	Anaerotignum_189125	5	0	3	0	0.89324	FALSE	0	Anaerotignum_189125	128928	0.363636																							1	0	1	0	1	1	FALSE	Akkermansia	1	0
6	0	0.166667	0	1	10	FALSE	UMGS1071	2	0	1	0	0	FALSE	0	UMGS1071	0	0																							4.76087	0	0.210046	0	1	11	FALSE	CAG-353	4	0
7.82906	0.0176098	0.127729	0	3	13	FALSE	Anaerosacchariphilus	2	0	3	0	0.875835	FALSE	0	Anaerosacchariphilus	32250	0.5																							3.45652	0	0.289308	0	1	8	FALSE	Velocimicrobium	16	0
4.18803	0.348659	0.238776	0	2	8	FALSE	CAG-605	4.5	0	2	0	0.942036	FALSE	0	CAG-605	530310	0.5																							1	1	1	0	2	1	FALSE	2024-02-14	1	0
4.94118	0	0.202381	1	2	10	FALSE	Paludicola	4.5	0	2	0	0.211765	FALSE	0	Paludicola	0	0.9																							1.5	0	0.666667	0	1	2	FALSE	CAG-41	2	0
5.06838	0	0.197302	0	1	12	FALSE	QALR01	3	0	1	0	0.92603	FALSE	0	QALR01	0	0																							5.17647	0	0.193182	0	1	8	FALSE	CAG-603	2	0
4.69231	0	0.213115	0	1	13	FALSE	Anaerofilum_73741	25	0	1	0	0.932867	FALSE	0	Anaerofilum_73741	0	0																							1.66667	0	0.6	0	1	2	FALSE	Copromorpha	3	0
7.1453	0	0.139952	0	1	12	FALSE	UMGS2069	5	0	1	0	0.888267	FALSE	0	UMGS2069	0	0																							1	0	1	0	1	1	FALSE	Holdemania	1	0
5.61538	0	0.178082	0	1	14	FALSE	RUG472	3	0	1	0	0.916084	FALSE	0	RUG472	0	0																							1	0	1	0	1	1	FALSE	RUG705	1	0
1	0	1	0	1	1	FALSE	Clostridium_T	1	0	1	0	1	FALSE	0	Clostridium_T	0	0																							5.34783	0.124638	0.186992	0	2	10	FALSE	UBA6448	2.5	0
1	0	1	0	1	1	FALSE	Sporofaciens	1	0	1	0	1	FALSE	0	Sporofaciens	0	0																							6.23913	0.0850242	0.160279	0	2	11	FALSE	Aphodomorpha	2	0
2.66667	0	0.375	0	1	4	FALSE	CAG-1252	3	0	1	0	0.444444	FALSE	0	CAG-1252	0	0																							1.5	0	0.666667	0	1	2	FALSE	Methanobrevibacter_A	2	0
2.5	0	0.4	0	1	4	FALSE	Methanobrevibacter_B	3	0	1	0	0.5	FALSE	0	Methanobrevibacter_B	0	0																							4.5	0.201932	0.222222	0	3	9	FALSE	UBA7862	1.66667	0
1	0	1	0	1	1	FALSE	Ructibacterium	1	0	1	0	1	FALSE	0	Ructibacterium	0	0																							2.54545	0.181818	0.392857	0	2	4	FALSE	UBA1259	2.5	0
1	0	1	0	1	1	FALSE	Ruminococcus_C_58660	1	0	1	0	1	FALSE	0	Ruminococcus_C_58660	0	0																							4.5	0.12657	0.222222	0	3	11	FALSE	SFMI01	2.33333	0
1	0	1	1	2	1	FALSE	UBA2658	2	0	2	0	1	FALSE	0	UBA2658	0	1																							3.65217	0.164734	0.27381	0.166667	4	10	FALSE	Fimiplasma	4	0
3.77778	2.97e-05	0.264706	0.9	5	11	FALSE	Adlercreutzia_404257	39.4	0	5	0	0.949495	FALSE	0	Adlercreutzia_404257	32	0.667797																							2.7	0	0.37037	1	2	4	FALSE	Gallalistipes	3	0
5	0	0.2	0	1	10	FALSE	Eubacterium_G	5	0	1	0	0.2	FALSE	0	Eubacterium_G	0	0																							3.5	0.0434783	0.285714	0.333333	3	9	FALSE	Paramuribaculum	7.33333	0
8.87179	0	0.112717	0	1	14	FALSE	ER4	3	0	1	0	0.856876	FALSE	0	ER4	0	0																							3.71739	0.00483092	0.269006	0.666667	3	10	FALSE	Ruminiclostridium_E	5.33333	0
4.92308	0	0.203125	0	1	10	FALSE	Bilifractor	3	0	1	0	0.928671	FALSE	0	Bilifractor	0	0																							4.28261	0	0.233503	0	1	10	FALSE	UBA2658	4	0
1.5	0.6	0.666667	0.333333	3	2	FALSE	UBA2813	2.66667	0	3	0	0.833333	FALSE	0	UBA2813	18	0.466667																							8.15217	0	0.122667	0	1	13	FALSE	QAMM01	2	0
8.82051	0	0.113372	0	1	14	FALSE	Enterenecus	3	0	1	0	0.857809	FALSE	0	Enterenecus	0	0																							7.17391	0.0434783	0.139394	0	2	12	FALSE	UBA1361	1.5	0
1	0	1	0	1	1	FALSE	UBA1427	1	0	1	0	1	FALSE	0	UBA1427	0	0																							5.47826	0	0.18254	0	1	12	FALSE	RUG12438	3	0
1	0	1	0	1	1	FALSE	CAG-313	1	0	1	0	1	FALSE	0	CAG-313	0	0																							1.5	0	0.666667	0	1	2	FALSE	Eubacterium_G	2	0
1	1	1	0	2	1	FALSE	Bacteroides_H	1	0	2	0	1	FALSE	0	Bacteroides_H	2	0																							1	1	1	0	2	1	FALSE	UBA1709	1	0
1.5	0	0.666667	0	1	2	FALSE	UBA1711	2	0	1	0	0.75	FALSE	0	UBA1711	0	0																							3.45455	0	0.289474	0	1	5	FALSE	CAG-510	2	0
7.89744	0	0.126623	1	2	13	FALSE	Agathobacter_164117	5	0	2	0	0.874592	FALSE	0	Agathobacter_164117	0	0.833333																							2.26667	0.133333	0.441176	0.333333	3	4	FALSE	Mogibacterium	4	0
1.5	0	0.666667	0	1	2	FALSE	Enterousia	2	0	1	0	0.75	FALSE	0	Enterousia	0	0																							3.2	0	0.3125	0	1	5	FALSE	Methanobrevibacter_D_1148	3	0
1	0	1	0	1	1	FALSE	Fimiplasma	1	0	1	0	1	FALSE	0	Fimiplasma	0	0																							3.88095	0	0.257669	0	1	8	FALSE	UMGS1994	5	0
1	0	1	0	1	1	FALSE	Acetanaerobacterium	1	0	1	0	1	FALSE	0	Acetanaerobacterium	0	0																							3.86957	0.00241546	0.258427	0	2	10	FALSE	Ructibacterium	4.5	0
5.06838	0	0.197302	0	1	11	FALSE	UBA6985	4	0	1	0	0.92603	FALSE	0	UBA6985	0	0																							1	0	1	0	1	1	FALSE	Aminipila	1	0
1.5	0	0.666667	0	1	2	FALSE	Ruminiclostridium_E	2	0	1	0	0.75	FALSE	0	Ruminiclostridium_E	0	0																							1	0	1	0	1	1	FALSE	Ruminococcus_C_58660	1	0
1	1	1	0	2	1	FALSE	Fimenecus	1	0	2	0	1	FALSE	0	Fimenecus	2	0																							1	0	1	0	1	1	FALSE	DSXL01	1	0
1.5	0	0.666667	0	1	2	FALSE	Butyricicoccus_A_77030	2	0	1	0	0.75	FALSE	0	Butyricicoccus_A_77030	0	0																							1	0	1	0	1	1	FALSE	Neobittarella	1	0
1	0	1	0	1	1	FALSE	VUNI01	1	0	1	0	1	FALSE	0	VUNI01	0	0																							3.41176	0	0.293103	0	1	6	FALSE	Staphylococcus	4	0
1	0	1	0	1	1	FALSE	UBA1413	1	0	1	0	1	FALSE	0	UBA1413	0	0																							3.6087	0	0.277108	0	1	9	FALSE	UBA644	16	0
1.5	0	0.666667	0	1	2	FALSE	CAG-417	2	0	1	0	0.75	FALSE	0	CAG-417	0	0																							1.5	0	0.666667	0	1	2	FALSE	Onthenecus	2	0
																																								5.47826	0	0.18254	0	1	10	FALSE	Angelakisella	3	0
																																								2.6	0	0.384615	1	2	4	FALSE	Hungatella_A_128155	5	0
																																								2.72727	0	0.366667	0	1	4	FALSE	UBA3402	4	0
																																								1.5	0	0.666667	0	1	2	FALSE	Anaerofilum_73741	2	0
																																								2.28571	0	0.4375	0	1	4	FALSE	Massilioclostridium	5	0
																																								1.75	0	0.571429	0	1	2	FALSE	Escherichia_710834	4	0
																																								4.47826	0	0.223301	0	1	10	FALSE	Phascolarctobacterium_A	3	0
																																								2.93333	0	0.340909	0	1	4	FALSE	CAG-1024	4	0
																																								3.28571	0	0.304348	0	1	7	FALSE	CAG-632	8	0
																																								3.53333	0	0.283019	0	1	5	FALSE	WRAY01	3	0
																																								1.33333	0	0.75	1	2	2	FALSE	Aphodousia	2.5	0
																																								6.41304	0	0.155932	0	1	13	FALSE	Eubacterium_N	2	0
																																								5.43478	0.0434783	0.184	0	2	12	FALSE	Pygmaiobacter	2	0
																																								2.85714	0	0.35	0	1	4	FALSE	UBA11490	2	0
																																								3	0	0.333333	0	1	5	FALSE	Eubacterium_I	4	0
																																								4.47059	0	0.223684	0	1	8	FALSE	UBA2813	2	0
																																								1	0	1	0	1	1	FALSE	Mobilisporobacter	1	0
																																								1	0	1	0	1	1	FALSE	Paralachnospira	1	0
																																								3.09091	0	0.323529	0	1	5	FALSE	Clostridium_N_143832	3	0
																																								1	0	1	0	1	1	FALSE	WRAP01	1	0
																																								1	0	1	0	1	1	FALSE	Marseille-P2935	1	0
[truncated: 26 more columns]
