# Supplementary material for: Functional relevance of seasonal variations in the gut microbiota of the Critically Endangered Hangul (Cervus hanglu hanglu)
Source: Research Square preprint supplement (doi:10.21203/rs.3.rs-6628029/v1), 2025-05-16
Supplement: Supplementary file 3 [file 39627daeab8863f8555799b4.xlsx]

## Sheet: Edge List
Table S6 Edge List
Spring							Summer							Autumn							Winter
Org1	Org2	asso	diss	adja			Org1	Org2	asso	diss	adja			Org1	Org2	asso	diss	adja			Org1	Org2	asso	diss	adja
Arthrobacter_B	Peribacillus_301373	1	0.00283111	0.997169			Azorhizobium	Caulobacter_487784	1	0.01	0.99			Novosphingobium_485350	Brachybacterium	1	0.0242891	0.975711			Streptococcus	UBA1367	1	0.0387662	0.961234
Bradyrhizobium	Ralstonia	1	0.0141103	0.98589			RUG13615	QAMH01	1	0.01	0.99			Novosphingobium_485350	FD2005	1	0.027288	0.972712			Choladousia	Raoultibacter	0.99	0.0744412	0.925559
Azorhizobium	Caulobacter_487784	1	0.0165037	0.983496			Methanobrevibacter_D_1148	Eubacterium_T	1	0.02	0.98			Treponema_D	WQSK01	1	0.0288106	0.971189			Denitrobacterium	Thermophilibacter	0.99	0.0859471	0.914053
Bradyrhizobium	Azorhizobium	1	0.0176778	0.982322			UBA4285	QAMH01	1	0.02	0.98			Reyranella	Azorhizobium	1	0.0291346	0.970865			Choladousia	Streptococcus	0.98	0.0940731	0.905927
Azorhizobium	Ralstonia	1	0.0179745	0.982025			UBA4285	Eubacterium_T	1	0.02	0.98			Aquabacterium_B_592457	Williamsia_A	1	0.0294323	0.970568			Thermophilibacter	UBA1367	0.98	0.0941826	0.905817
Marvinbryantia	UMGS1994	1	0.0194488	0.980551			RUG13615	UBA4285	1	0.03	0.97			CAG-1252	CAG-964	1	0.0308218	0.969178			Denitrobacterium	Streptococcus	0.98	0.0972906	0.902709
Marvinbryantia	Eubacterium_R	1	0.0251751	0.974825			UBA9715	Copromorpha	1	0.03	0.97			Aquabacterium_A	Aquabacterium_B_592457	1	0.0330939	0.966906			Denitrobacterium	UBA1367	0.98	0.0995339	0.900466
UMGS1994	Eubacterium_R	1	0.0310333	0.968967			RUG13615	Methanobrevibacter_D_1148	1	0.03	0.97			VBCK01	Taonella	1	0.0337836	0.966216			Choladousia	UBA1367	0.98	0.0997993	0.900201
Bradyrhizobium	Caulobacter_487784	1	0.0318827	0.968117			Eubacterium_T	QAMH01	1	0.03	0.97			Aquabacterium_B_592457	UBA1930	1	0.0338176	0.966182			Oribacterium	UBA1367	0.98	0.106409	0.893591
Ralstonia	Caulobacter_487784	1	0.033811	0.966189			RUG472	Methanobrevibacter_D_1148	1	0.03	0.97			Aquabacterium_A	Brachybacterium	1	0.0343451	0.965655			Thermophilibacter	Streptococcus	0.98	0.110581	0.889419
UMGS1994	Peribacillus_301373	1	0.036091	0.963909			RUG13615	Eubacterium_T	1	0.03	0.97			UBA1930	Williamsia_A	1	0.0343743	0.965626			Choladousia	Oribacterium	0.98	0.111759	0.888241
UMGS1994	Arthrobacter_B	1	0.0373878	0.962612			UBA4285	Methanobrevibacter_D_1148	1	0.03	0.97			Bradyrhizobium	Azorhizobium	1	0.035554	0.964446			Coprococcus_A_187866	Shuttleworthia	0.97	0.113757	0.886243
Marvinbryantia	Peribacillus_301373	1	0.0394893	0.960511			RUG472	UBA4285	1	0.03	0.97			Ralstonia	Brevundimonas	1	0.0366878	0.963312			Raoultibacter	Denitrobacterium	0.97	0.115276	0.884724
Marvinbryantia	Arthrobacter_B	1	0.0403157	0.959684			Methanobrevibacter_D_1148	QAMH01	1	0.03	0.97			Haliangium_463188	Williamsia_A	1	0.0388145	0.961186			Shuttleworthia	Blautia_A_141781	0.97	0.115739	0.884261
Adlercreutzia_404218	UBA2730	1	0.043229	0.956771			RUG472	RUG13615	1	0.03	0.97			Ralstonia	Caulobacter_487784	1	0.0435662	0.956434			Choladousia	Denitrobacterium	0.97	0.116253	0.883747
CAG-273	CAG-710	1	0.0444185	0.955581			RUG472	QAMH01	1	0.04	0.96			Azorhizobium	Caulobacter_487784	1	0.0436032	0.956397			Oribacterium	Streptococcus	0.97	0.116426	0.883574
Suipraeoptans	RUG521	1	0.0450209	0.954979			RUG472	Eubacterium_T	1	0.04	0.96			Reyranella	Bradyrhizobium	1	0.044127	0.955873			UBA1367	Blautia_A_141781	0.97	0.121115	0.878885
UMGS1994	RUG521	1	0.0465676	0.953432			UBA1711	CAG-475	1	0.04	0.96			Haliangium_463188	Aquabacterium_B_592457	1	0.044232	0.955768			Coprococcus_A_187866	Blautia_A_141781	0.97	0.121232	0.878768
UBA1930	Ralstonia	1	0.0496817	0.950318			UBA9715	UBA1367	1	0.04	0.96			UBA1930	Taonella	1	0.0448476	0.955152			Oribacterium	Denitrobacterium	0.97	0.12286	0.87714
Aureimonas_A_501548	Adlercreutzia_404218	0.99	0.0503803	0.94962			UBA9715	QAMH01	1	0.04	0.96			Brachybacterium	FD2005	1	0.0456283	0.954372			Streptococcus	Blautia_A_141781	0.97	0.124649	0.875351
BX12	Pradoshia	0.99	0.0508158	0.949184			UBA1367	Copromorpha	1	0.05	0.95			UBA1930	Brevundimonas	1	0.0460312	0.953969			Raoultibacter	Streptococcus	0.97	0.127052	0.872948
Peribacillus_301373	Eubacterium_R	0.99	0.0529956	0.947004			QAMH01	Copromorpha	1	0.05	0.95			Bradyrhizobium	Caulobacter_487784	1	0.0470444	0.952956			Oribacterium	Thermophilibacter	0.97	0.127202	0.872798
Arthrobacter_B	Eubacterium_R	0.99	0.053312	0.946688			RUG13615	UBA9715	1	0.05	0.95			Aquabacterium_A	Williamsia_A	1	0.0476518	0.952348			Ruminococcus_E	Blautia_A_141781	0.97	0.12845	0.87155
Adlercreutzia_404218	Actinomyces	0.99	0.0536068	0.946393			RUG13615	UBA1367	0.99	0.05	0.95			Haliangium_463188	UBA1930	1	0.0479025	0.952098			Raoultibacter	UBA1367	0.96	0.132299	0.867701
Arthrobacter_B	Actinomyces	0.99	0.0536694	0.946331			UBA1367	QAMH01	0.99	0.05	0.95			Reyranella	Caulobacter_487784	1	0.0497447	0.950255			Choladousia	Thermophilibacter	0.96	0.134556	0.865444
Peribacillus_301373	Actinomyces	0.99	0.0538807	0.946119			RUG13615	Copromorpha	0.99	0.05	0.95			Brachybacterium	Williamsia_A	0.99	0.0508932	0.949107			Oribacterium	Raoultibacter	0.96	0.136179	0.863821
Bradyrhizobium	UBA1930	0.99	0.0544706	0.945529			UBA4285	UBA9715	0.99	0.06	0.94			Aquabacterium_B_592457	Brachybacterium	0.99	0.0512027	0.948797			Mobilitalea	CAG-353	0.96	0.136437	0.863563
DSXL01	Aureimonas_A_501548	0.99	0.0558834	0.944117			UBA4285	Copromorpha	0.99	0.06	0.94			Traorella	Eisenbergiella	0.99	0.0554537	0.944546			Shuttleworthia	Streptococcus	0.96	0.136703	0.863297
Marvinbryantia	Akkermansia	0.99	0.0566444	0.943356			Azorhizobium	Ralstonia	0.99	0.06	0.94			Bacillus_AD	Neobacillus	0.99	0.055834	0.944166			Shuttleworthia	UBA1367	0.96	0.137326	0.862674
Duncaniella	UBA2730	0.99	0.0570151	0.942985			UBA4285	UBA1367	0.99	0.06	0.94			Aquabacterium_A	Novosphingobium_485350	0.99	0.0562385	0.943761			Methanosphaera	Methanobrevibacter_A	0.96	0.138169	0.861831
Marvinbryantia	BX12	0.99	0.0581558	0.941844			Ralstonia	Caulobacter_487784	0.99	0.06	0.94			Aquabacterium_A	Massilia	0.99	0.0564159	0.943584			Raoultibacter	Thermophilibacter	0.96	0.144225	0.855775
Butyrivibrio_A_168226	Arthrobacter_B	0.99	0.0585673	0.941433			Clostridium_T	Methanobrevibacter_D_1148	0.99	0.07	0.93			Brachybacterium	Massilia	0.99	0.0587565	0.941243			Ruminococcus_E	UBA1367	0.96	0.144834	0.855166
UMGS1994	Akkermansia	0.99	0.05867	0.94133			RUG472	Clostridium_T	0.99	0.07	0.93			Haliangium_463188	Massilia	0.99	0.0595782	0.940422			SFEB01	Thermophilibacter	0.96	0.144926	0.855074
Christensenella	Actinomyces	0.99	0.0589889	0.941011			RUG472	UBA1367	0.99	0.07	0.93			Aquabacterium_A	UBA1930	0.99	0.0600024	0.939998			Oribacterium	Blautia_A_141781	0.96	0.145866	0.854134
Akkermansia	Peribacillus_301373	0.99	0.0595489	0.940451			RUG472	UBA9715	0.99	0.07	0.93			UBA1930	Ralstonia	0.99	0.0603985	0.939601			WQSK01	WQUU01	0.96	0.146218	0.853782
Butyrivibrio_A_168226	Peribacillus_301373	0.99	0.0597853	0.940215			UBA9715	Eubacterium_T	0.99	0.07	0.93			SIO2C1	Pelagibacter_A_533952	0.99	0.0612702	0.93873			Ruminococcus_E	Streptococcus	0.96	0.149094	0.850906
UMGS1994	BX12	0.99	0.0601959	0.939804			Coprenecus	CAG-475	0.99	0.07	0.93			Haliangium_463188	Azorhizobium	0.99	0.0612889	0.938711			Choladousia	Blautia_A_141781	0.95	0.151598	0.848402
Marvinbryantia	RUG521	0.99	0.0606101	0.93939			Eubacterium_T	Copromorpha	0.99	0.07	0.93			WQSK01	Eubacterium_Q	0.99	0.0617179	0.938282			Eubacterium_R	NK4A144	0.95	0.159295	0.840705
Arthrobacter_B	Akkermansia	0.99	0.0607665	0.939233			RUG472	Copromorpha	0.99	0.07	0.93			UBA1930	VBCK01	0.99	0.0624223	0.937578			Denitrobacterium	SFEB01	0.95	0.161064	0.838936
Arthrobacter_B	Christensenella	0.99	0.0609716	0.939028			Methanobrevibacter_D_1148	UBA9715	0.99	0.07	0.93			Novosphingobium_485350	Williamsia_A	0.99	0.062616	0.937384			Fimimorpha	Paraeggerthella	0.95	0.161103	0.838897
Adlercreutzia_404218	Duncaniella	0.99	0.0614984	0.938502			UBA4285	Clostridium_T	0.99	0.07	0.93			Aquabacterium_B_592457	Taonella	0.99	0.0628052	0.937195			UBA11490	RUG13077	0.95	0.161441	0.838559
Eubacterium_R	RUG521	0.99	0.0615785	0.938421			UBA1367	Eubacterium_T	0.99	0.07	0.93			Traorella	Scatoplasma	0.99	0.0632103	0.93679			Borkfalkia	RUG13077	0.94	0.166051	0.833949
Marvinbryantia	Actinomyces	0.99	0.0621548	0.937845			Clostridium_T	Eubacterium_T	0.99	0.07	0.93			Haliangium_463188	Aquabacterium_A	0.99	0.0642975	0.935702			Bilifractor	Thermophilibacter	0.94	0.168315	0.831685
Butyrivibrio_A_168226	Akkermansia	0.99	0.0622282	0.937772			Methanobrevibacter_D_1148	UBA1367	0.99	0.08	0.92			Aquabacterium_B_592457	Massilia	0.99	0.0648333	0.935167			Oribacterium	Ruminococcus_E	0.94	0.168889	0.831111
Peribacillus_301373	Christensenella	0.99	0.0624851	0.937515			Turicibacter	Clostridioides_A	0.99	0.08	0.92			Haliangium_463188	Brevundimonas	0.99	0.0654555	0.934544			Choladousia	Ruminococcus_E	0.94	0.169302	0.830698
Olsenella_H_405128	Suipraeoptans	0.99	0.0628291	0.937171			Anaerofilum_73741	RUG13038	0.99	0.08	0.92			CAG-873	Phocaeicola_A_858004	0.99	0.0655189	0.934481			Pradoshia	CAG-914	0.94	0.169874	0.830126
Marvinbryantia	Butyrivibrio_A_168226	0.99	0.06289	0.93711			RUG13615	Clostridium_T	0.99	0.08	0.92			Emergencia	Bariatricus	0.99	0.0660951	0.933905			Thermophilibacter	Shuttleworthia	0.94	0.170346	0.829654
Berryella	Akkermansia	0.99	0.0635569	0.936443			Clostridioides_A	Eubacterium_T	0.99	0.08	0.92			Taonella	Brevundimonas	0.99	0.066215	0.933785			Eubacterium_R	CAG-269	0.94	0.170971	0.829029
Adlercreutzia_404218	Arthrobacter_B	0.99	0.0636729	0.936327			Methanobrevibacter_D_1148	Copromorpha	0.99	0.08	0.92			VBCK01	Brevundimonas	0.99	0.0662328	0.933767			Thermophilibacter	Blautia_A_141781	0.94	0.173581	0.826419
Bulleidia	RUG721	0.99	0.0638406	0.936159			Coprenecus	UBA1711	0.99	0.08	0.92			Ventrisoma	Traorella	0.99	0.0681325	0.931868			UBA6448	FD2005	0.94	0.174568	0.825432
Adlercreutzia_404218	Peribacillus_301373	0.99	0.0638793	0.936121			Methanobrevibacter_D_1148	Clostridioides_A	0.99	0.08	0.92			CAG-964	WG-1	0.99	0.0684071	0.931593			Borkfalkia	PeH17	0.94	0.176282	0.823718
Adlercreutzia_404218	Christensenella	0.99	0.0646415	0.935359			Clostridium_T	QAMH01	0.99	0.08	0.92			Massilia	Williamsia_A	0.99	0.0687498	0.93125			NK4A144	CAG-269	0.94	0.176283	0.823717
Butyrivibrio_A_168226	UMGS1994	0.99	0.065181	0.934819			Emergencia	BX12	0.99	0.08	0.92			Caulobacter_487784	Brevundimonas	0.99	0.0695544	0.930446			Raoultibacter	Ruminococcus_E	0.94	0.176872	0.823128
BX12	Eubacterium_R	0.99	0.0655122	0.934488			UBA4285	Clostridioides_A	0.99	0.08	0.92			Harryflintia	UBA7173	0.99	0.0696386	0.930361			Borkfalkia	UBA2253	0.94	0.176891	0.823109
Ruminococcus_F	Ruminococcus_C_59129	0.99	0.0655231	0.934477			Anaerofilum_73741	Peribacillus_301373	0.99	0.08	0.92			Emergencia	Harryflintia	0.99	0.0699988	0.930001			UBA11490	Borkfalkia	0.94	0.177016	0.822984
Azorhizobium	UBA1930	0.99	0.0663806	0.933619			UBA4285	Turicibacter	0.99	0.08	0.92			CAG-177	Intestinimonas	0.99	0.07	0.93			Parafannyhessea	Bulleidia	0.93	0.180636	0.819364
Butyrivibrio_A_168226	Christensenella	0.99	0.0665379	0.933462			RUG472	Clostridioides_A	0.99	0.08	0.92			Aquabacterium_B_592457	Novosphingobium_485350	0.99	0.0712062	0.928794			Coprosoma	Paraeggerthella	0.93	0.180941	0.819059
Olsenella_H_405128	RUG521	0.99	0.0668234	0.933177			Anaerofilum_73741	UBA9715	0.99	0.08	0.92			Haliangium_463188	Ralstonia	0.99	0.0718323	0.928168			UMGS1994	Eubacterium_R	0.93	0.183609	0.816391
UMGS1994	Actinomyces	0.99	0.0674844	0.932516			Turicibacter	QAMH01	0.99	0.08	0.92			CAG-307	UBA1402	0.99	0.0719578	0.928042			UMGS1994	CAG-269	0.93	0.183976	0.816024
Peribacillus_301373	RUG521	0.99	0.0680221	0.931978			Clostridioides_A	QAMH01	0.99	0.08	0.92			Taonella	Williamsia_A	0.99	0.0719775	0.928023			Raoultibacter	Blautia_A_141781	0.93	0.184386	0.815614
Arthrobacter_B	RUG521	0.99	0.0685677	0.931432			CAG-793	Eubacterium_T	0.99	0.08	0.92			Anaerotignum_189125	Traorella	0.99	0.0725506	0.927449			Treponema_D	Eubacterium_Q	0.93	0.184766	0.815234
Marvinbryantia	Adlercreutzia_404218	0.99	0.0696838	0.930316			RUG13615	Turicibacter	0.99	0.08	0.92			Lawsonibacter	Intestinimonas	0.99	0.0725567	0.927443			UBA11490	PeH17	0.93	0.184806	0.815194
Aureimonas_A_501548	UBA2730	0.99	0.0697718	0.930228			RUG13615	Clostridioides_A	0.99	0.08	0.92			Eisenbergiella	Scatoplasma	0.99	0.0726779	0.927322			Raoultibacter	Sporofaciens	0.93	0.184988	0.815012
Marvinbryantia	Christensenella	0.99	0.0699632	0.930037			RUG13615	CAG-793	0.99	0.09	0.91			Aquabacterium_B_592457	Brevundimonas	0.99	0.0733472	0.926653			Ruminococcus_E	Shuttleworthia	0.93	0.185464	0.814536
Akkermansia	FD2005	0.99	0.0704376	0.929562			Bilifractor	Raoultibacter	0.99	0.09	0.91			Treponema_D	Eubacterium_Q	0.99	0.0736611	0.926339			Neobittarella	FD2005	0.93	0.185836	0.814164
Clostridium_N_143832	CAG-1427	0.99	0.070672	0.929328			RUG13038	Copromorpha	0.98	0.09	0.91			Williamsia_A	Brevundimonas	0.99	0.0736956	0.926304			SFEB01	UBA1367	0.93	0.18607	0.81393
Pradoshia	Copromorpha	0.99	0.0713341	0.928666			RUG13038	Eubacterium_I	0.98	0.09	0.91			Ventrisoma	Scatoplasma	0.99	0.074818	0.925182			PeH17	RUG13077	0.93	0.187403	0.812597
Akkermansia	Eubacterium_R	0.99	0.0716848	0.928315			Methanobrevibacter_D_1148	CAG-793	0.98	0.09	0.91			Ralstonia	Taonella	0.99	0.0749564	0.925044			Coprococcus_A_187866	Streptococcus	0.93	0.187737	0.812263
RUG705	Scybalousia	0.99	0.0717052	0.928295			RUG472	Turicibacter	0.98	0.09	0.91			Novosphingobium_485350	Massilia	0.99	0.0751783	0.924822			Denitrobacterium	Ruminococcus_E	0.93	0.188249	0.811751
BICA1-8	Eubacterium_T	0.99	0.0721343	0.927866			RUG472	CAG-793	0.98	0.09	0.91			Haliangium_463188	Caulobacter_487784	0.99	0.0755197	0.92448			Parafannyhessea	Anaerofilum_73741	0.93	0.188386	0.811614
DSXL01	Christensenella	0.99	0.0730975	0.926903			Turicibacter	UBA9715	0.98	0.09	0.91			Azorhizobium	Ralstonia	0.99	0.0756855	0.924315			Coprococcus_A_187866	UBA1367	0.93	0.189136	0.810864
UMGS1994	Suipraeoptans	0.99	0.0731804	0.92682			CAG-793	QAMH01	0.98	0.09	0.91			Haliangium_463188	Brachybacterium	0.99	0.0763102	0.92369			WQUU01	Lachnospira	0.93	0.189406	0.810594
Olsenella_H_405128	Acinetobacter	0.99	0.0733486	0.926651			Anaerofilum_73741	Copromorpha	0.98	0.09	0.91			UBA1930	Brachybacterium	0.99	0.0767019	0.923298			Parafannyhessea	Oribacterium	0.93	0.19048	0.80952
Butyrivibrio_A_168226	Actinomyces	0.99	0.0734621	0.926538			Turicibacter	UBA1367	0.98	0.09	0.91			Aquabacterium_B_592457	Ralstonia	0.99	0.0769234	0.923077			SFEB01	Streptococcus	0.93	0.191042	0.808958
Aureimonas_A_501548	Christensenella	0.99	0.0740446	0.925955			UBA4285	CAG-793	0.98	0.09	0.91			Bariatricus	Blautia_A_141781	0.99	0.0782191	0.921781			Denitrobacterium	Blautia_A_141781	0.93	0.191253	0.808747
Nanosyncoccus	Scybalousia	0.99	0.0741053	0.925895			RUG13038	UBA9715	0.98	0.09	0.91			Aquabacterium_A	FD2005	0.99	0.0783436	0.921656			Limiplasma	Eubacterium_Q	0.93	0.19273	0.80727
UMGS1994	Berryella	0.99	0.0741777	0.925822			Turicibacter	Copromorpha	0.98	0.09	0.91			Aquabacterium_A	Taonella	0.99	0.0796206	0.920379			RUG721	Shuttleworthia	0.93	0.192981	0.807019
DSXL01	Adlercreutzia_404218	0.99	0.074468	0.925532			Turicibacter	Eubacterium_T	0.98	0.09	0.91			Paracoccus	Rothia	0.99	0.0797541	0.920246			UBA2253	PeH17	0.92	0.193663	0.806337
Duncaniella	Actinomyces	0.99	0.0744714	0.925529			Eubacterium_I	Copromorpha	0.98	0.1	0.9			Reyranella	Paracoccus	0.99	0.0800172	0.919983			RUG721	Coprococcus_A_187866	0.92	0.193747	0.806253
Turicibacter	Romboutsia_B	0.99	0.0748925	0.925108			Turicibacter	Methanobrevibacter_D_1148	0.98	0.1	0.9			Fusobacterium_A	Fusobacterium_B	0.99	0.0805532	0.919447			Bilifractor	Mogibacterium	0.92	0.194291	0.805709
Clostridium_N_143832	Scybalousia	0.99	0.0749601	0.92504			Anaerofilum_73741	UBA1367	0.98	0.1	0.9			VBCK01	Ralstonia	0.99	0.0812415	0.918758			Oribacterium	Shuttleworthia	0.92	0.196268	0.803732
UMGS1994	Adlercreutzia_404218	0.99	0.0754568	0.924543			CAG-793	Copromorpha	0.98	0.1	0.9			Traorella	Intestinimonas	0.99	0.081823	0.918177			Nitrosocosmicus	Actinomycetospora	0.92	0.196637	0.803363
Eubacterium_R	Copromorpha	0.99	0.0755296	0.92447			UBA9715	Eubacterium_I	0.98	0.1	0.9			WQSK01	1XD42-69	0.99	0.0818353	0.918165			Parafannyhessea	UBA1367	0.92	0.198261	0.801739
Berryella	FD2005	0.99	0.0759038	0.924096			UBA9715	Clostridioides_A	0.98	0.11	0.89			Prevotella	F0058	0.99	0.082425	0.917575			Coprococcus_A_187866	Ruminococcus_E	0.92	0.198477	0.801523
UMGS1994	Christensenella	0.99	0.0760117	0.923988			RUG13038	UBA1367	0.98	0.11	0.89			Neobacillus	Solibacillus	0.99	0.0830727	0.916927			Parafannyhessea	Bilifractor	0.92	0.198557	0.801443
Butyrivibrio_A_168226	Eubacterium_R	0.99	0.0761437	0.923856			Anaerofilum_73741	Eubacterium_I	0.98	0.11	0.89			Bradyrhizobium	Ralstonia	0.99	0.0831794	0.916821			Parafannyhessea	Blautia_A_141781	0.92	0.198666	0.801334
Eubacterium_R	Actinomyces	0.99	0.0762045	0.923795			CAG-793	UBA1367	0.98	0.11	0.89			CAG-196	Enterousia	0.99	0.0833201	0.91668			Denitrobacterium	Shuttleworthia	0.92	0.199211	0.800789
Nanosyncoccus	RUG705	0.99	0.0776098	0.92239			UBA9715	Peribacillus_301373	0.98	0.11	0.89			Reyranella	Haliangium_463188	0.99	0.0836656	0.916334			Parafannyhessea	Thermophilibacter	0.92	0.199652	0.800348
Butyrivibrio_A_168226	Adlercreutzia_404218	0.99	0.0777904	0.92221			Anaerofilum_73741	Methanobrevibacter_A	0.98	0.11	0.89			Bradyrhizobium	Paracoccus	0.99	0.084241	0.915759			Ruminococcus_E	Thermophilibacter	0.92	0.199978	0.800022
Acinetobacter	RUG521	0.99	0.0783398	0.92166			Clostridium_T	UBA1367	0.98	0.11	0.89			Azorhizobium	Brevundimonas	0.98	0.0869601	0.91304			Choladousia	Parafannyhessea	0.92	0.200599	0.799401
BX12	Copromorpha	0.99	0.0788058	0.921194			Clostridium_T	UBA9715	0.98	0.11	0.89			FD2005	Williamsia_A	0.98	0.0871291	0.912871			UMGS1994	NK4A144	0.92	0.20449	0.79551
Nanosyncoccus	Clostridium_N_143832	0.99	0.079262	0.920738			UBA9715	CAG-793	0.98	0.11	0.89			Treponema_D	1XD42-69	0.98	0.0875389	0.912461			Neobittarella	UBA6448	0.92	0.20475	0.79525
Arthrobacter_B	Duncaniella	0.99	0.079363	0.920637			Raoultibacter	Coprococcus_A_187866	0.98	0.11	0.89			CAG-177	Eisenbergiella	0.98	0.0875651	0.912435			Mobilitalea	Paludicola	0.91	0.206242	0.793758
Berryella	RUG521	0.99	0.0794033	0.920597			UBA1367	Eubacterium_I	0.98	0.11	0.89			Adlercreutzia_404257	FD2005	0.98	0.0880635	0.911936			Oribacterium	Bilifractor	0.91	0.206396	0.793604
Marvinbryantia	Copromorpha	0.99	0.0797198	0.92028			Clostridioides_A	UBA1367	0.98	0.11	0.89			Ralstonia	Williamsia_A	0.98	0.0880723	0.911928			SFEB01	Shuttleworthia	0.91	0.207434	0.792566
Butyrivibrio_A_168226	RUG521	0.99	0.0798251	0.920175			Mogibacterium	Copromorpha	0.98	0.11	0.89			Reyranella	Ralstonia	0.98	0.0895899	0.91041			Parafannyhessea	Streptococcus	0.91	0.208049	0.791951
Peribacillus_301373	Duncaniella	0.99	0.0798735	0.920126			Emergencia	FD2005	0.98	0.11	0.89			UBA1930	Caulobacter_487784	0.98	0.0896059	0.910394			UBA1711	CAG-632	0.91	0.208738	0.791262
Eubacterium_R	Christensenella	0.99	0.0800288	0.919971			Turicibacter	Romboutsia_B	0.97	0.11	0.89			Azorhizobium	Massilia	0.98	0.0896148	0.910385			Turicibacter	Clostridioides_A	0.91	0.210068	0.789932
Actinomyces	UBA2730	0.99	0.0806672	0.919333			Clostridium_T	Copromorpha	0.97	0.11	0.89			Methanosphaera	Longicatena	0.98	0.0897469	0.910253			Choladousia	Shuttleworthia	0.91	0.210414	0.789586
Christensenella	Saccharofermentans	0.99	0.0815056	0.918494			UBA1427	CAG-475	0.97	0.11	0.89			Aquabacterium_B_592457	VBCK01	0.98	0.0898914	0.910109			Bilifractor	Denitrobacterium	0.91	0.210494	0.789506
Nanosyncoccus	CAG-1427	0.99	0.0818211	0.918179			Clostridioides_A	Copromorpha	0.97	0.12	0.88			Haliangium_463188	Bradyrhizobium	0.98	0.0902755	0.909724			Coprosoma	Anaerofustis	0.91	0.211283	0.788717
BX12	Akkermansia	0.99	0.0821836	0.917816			Clostridium_T	Clostridioides_A	0.97	0.12	0.88			Intestinimonas	Eisenbergiella	0.98	0.0905044	0.909496			Romboutsia_B	Copromorpha	0.91	0.213345	0.786655
Marvinbryantia	Berryella	0.99	0.0821842	0.917816			Peribacillus_301373	Methanobrevibacter_A	0.97	0.12	0.88			UBA1930	Novosphingobium_485350	0.98	0.0909818	0.909018			Bilifractor	UBA1367	0.91	0.213711	0.786289
Aureimonas_A_501548	Actinomyces	0.99	0.0826545	0.917346			CAG-1024	UBA1367	0.97	0.12	0.88			CAG-1252	WG-1	0.98	0.0911206	0.908879			CAG-269	Butyricimonas	0.91	0.213962	0.786038
UBA1930	Caulobacter_487784	0.99	0.0827756	0.917224			Mogibacterium	RUG13038	0.97	0.12	0.88			UBA1930	Massilia	0.98	0.0914461	0.908554			Parafannyhessea	Coprococcus_A_187866	0.9	0.218434	0.781566
UMGS1994	Copromorpha	0.99	0.0828082	0.917192			Stenotrophomonas_A_615274	Clostridium_T	0.97	0.12	0.88			VBCK01	Williamsia_A	0.98	0.0915598	0.90844			Bilifractor	Streptococcus	0.9	0.219429	0.780571
Butyrivibrio_A_168226	QAMH01	0.99	0.0834312	0.916569			Mogibacterium	Eubacterium_T	0.97	0.12	0.88			Haliangium_463188	Taonella	0.98	0.0915712	0.908429			JC017	Romboutsia_B	0.9	0.219538	0.780462
RUG721	Eubacterium_I	0.99	0.0837181	0.916282			Anaerofilum_73741	QAMH01	0.97	0.12	0.88			Haliangium_463188	Novosphingobium_485350	0.98	0.0917718	0.908228			Oribacterium	SFEB01	0.9	0.219698	0.780302
RUG721	Copromorpha	0.99	0.0839234	0.916077			Clostridium_T	CAG-793	0.97	0.12	0.88			Massilia	FD2005	0.98	0.0930453	0.906955			Nanosyncoccus	Spyradosoma	0.9	0.220061	0.779939
BX12	Peribacillus_301373	0.99	0.0839434	0.916057			UBA4285	Mogibacterium	0.97	0.12	0.88			Aquabacterium_B_592457	FD2005	0.98	0.0938182	0.906182			Choladousia	SFEB01	0.9	0.220097	0.779903
Akkermansia	Actinomyces	0.99	0.0843146	0.915685			Peribacillus_301373	Copromorpha	0.97	0.12	0.88			Aquabacterium_B_592457	Azorhizobium	0.98	0.0946373	0.905363			Oribacterium	Coprococcus_A_187866	0.9	0.220922	0.779078
Butyrivibrio_A_168226	Duncaniella	0.99	0.0843969	0.915603			Mogibacterium	UBA9715	0.97	0.12	0.88			CAG-1000	Anaerotignum_189125	0.98	0.0947676	0.905232			Bilifractor	Blautia_A_141781	0.9	0.221655	0.778345
Suipraeoptans	QAMH01	0.99	0.0844718	0.915528			RUG13615	Anaerofilum_73741	0.97	0.12	0.88			Ventrisoma	Intestinimonas	0.98	0.0947808	0.905219			Coprosoma	Clostridioides_A	0.9	0.222563	0.777437
Adlercreutzia_404218	Akkermansia	0.99	0.0845728	0.915427			JC017	UBA1367	0.97	0.12	0.88			Aquabacterium_B_592457	Caulobacter_487784	0.98	0.0948188	0.905181			Choladousia	Bilifractor	0.9	0.223555	0.776445
CAG-1427	Copromorpha	0.99	0.0848891	0.915111			RUG13038	Methanobrevibacter_A	0.97	0.12	0.88			Bradyrhizobium	Brevundimonas	0.98	0.0948725	0.905127			Bulleidia	Mogibacterium	0.9	0.223622	0.776378
Suipraeoptans	Eubacterium_R	0.99	0.0850378	0.914962			JC017	UBA9715	0.97	0.12	0.88			Adlercreutzia_404257	Novosphingobium_485350	0.98	0.0953842	0.904616			Bilifractor	Shuttleworthia	0.9	0.223892	0.776108
Marvinbryantia	Duncaniella	0.99	0.0851109	0.914889			RUG472	JC017	0.97	0.12	0.88			Gabonibacter	CAG-1000	0.98	0.0958591	0.904141			WQSK01	Lachnospira	0.9	0.224409	0.775591
Slackia_A	RUG705	0.99	0.0855611	0.914439			Mogibacterium	QAMH01	0.97	0.12	0.88			UBA5905	UBA3207	0.98	0.095886	0.904114			Bilifractor	Raoultibacter	0.9	0.224726	0.775274
Clostridium_N_143832	Pradoshia	0.99	0.0855842	0.914416			Clostridioides_A	CAG-793	0.97	0.12	0.88			Azorhizobium	Paracoccus	0.98	0.0963154	0.903685			Succinivibrio	NK4A144	0.9	0.225313	0.774687
RUG521	QAMH01	0.99	0.0856167	0.914383			RUG13615	JC017	0.97	0.12	0.88			Azorhizobium	UBA1930	0.98	0.0968848	0.903115			PeH17	CAG-475	0.9	0.22652	0.77348
UMGS1994	Duncaniella	0.99	0.0856756	0.914324			Turicibacter	CAG-793	0.97	0.12	0.88			Reyranella	Massilia	0.98	0.0976301	0.90237			Spyradosoma	Solibacillus	0.9	0.226731	0.773269
Butyrivibrio_A_168226	Berryella	0.99	0.0859438	0.914056			Mogibacterium	CAG-793	0.97	0.12	0.88			Brachybacterium	Taonella	0.98	0.0980507	0.901949			Coprococcus_A_187866	Thermophilibacter	0.9	0.227595	0.772405
Marvinbryantia	Suipraeoptans	0.99	0.0860225	0.913977			UBA9715	CAG-1024	0.97	0.12	0.88			CAG-177	Traorella	0.98	0.0986607	0.901339			Raoultibacter	SFEB01	0.9	0.228091	0.771909
BX12	Arthrobacter_B	0.99	0.0860375	0.913963			RUG13038	QAMH01	0.97	0.12	0.88			Azorhizobium	Williamsia_A	0.98	0.0993165	0.900683			Parafannyhessea	Denitrobacterium	0.9	0.228671	0.771329
Aureimonas_A_501548	Butyrivibrio_A_168226	0.99	0.0860924	0.913908			Peribacillus_301373	UBA1367	0.97	0.12	0.88			Muricomes_149725	Bilifractor	0.98	0.0993789	0.900621
Adlercreutzia_404218	Eubacterium_R	0.99	0.0865142	0.913486			RUG13038	Peribacillus_301373	0.97	0.13	0.87			Anaerotignum_189125	Eisenbergiella	0.98	0.0994938	0.900506
BX12	Berryella	0.99	0.0865242	0.913476			Adlercreutzia_404199	Raoultibacter	0.97	0.13	0.87			Anaerotignum_189125	Scatoplasma	0.98	0.0996784	0.900322
Suipraeoptans	Berryella	0.98	0.0870407	0.912959			UBA1067	Christensenella	0.97	0.13	0.87			Aquabacterium_A	Ralstonia	0.98	0.100086	0.899914
DSXL01	Actinomyces	0.98	0.0880031	0.911997			Peribacillus_301373	QAMH01	0.97	0.13	0.87			Ventrisoma	Eisenbergiella	0.98	0.101553	0.898447
Clostridium_N_143832	CAG-710	0.98	0.0881628	0.911837			RUG13615	Mogibacterium	0.97	0.13	0.87			Aquabacterium_A	Brevundimonas	0.98	0.101804	0.898196
Suipraeoptans	Copromorpha	0.98	0.0883179	0.911682			RUG13615	RUG13038	0.97	0.13	0.87			Clostridium_Q_135822	Anaerotignum_189125	0.98	0.102532	0.897468
CAG-273	CAG-1427	0.98	0.0888837	0.911116			JC017	QAMH01	0.97	0.13	0.87			Adlercreutzia_404257	Brachybacterium	0.98	0.102744	0.897256
Duncaniella	RUG521	0.98	0.0890061	0.910994			UBA4285	Anaerofilum_73741	0.97	0.13	0.87			SIO2C1	Alteromonas_F	0.98	0.103604	0.896396
CAG-1427	CAG-710	0.98	0.0891062	0.910894			Clostridium_T	Turicibacter	0.97	0.13	0.87			UBA1427	WG-1	0.98	0.104009	0.895991
Marvinbryantia	DSXL01	0.98	0.089452	0.910548			JC017	Methanobrevibacter_D_1148	0.97	0.13	0.87			Ventrisoma	Anaerotignum_189125	0.98	0.104908	0.895092
Bulleidia	Eubacterium_I	0.98	0.0895811	0.910419			CAG-1024	Copromorpha	0.97	0.13	0.87			Paracoccus	Caulobacter_487784	0.98	0.104908	0.895092
Akkermansia	RUG521	0.98	0.0899533	0.910047			BX12	FD2005	0.97	0.13	0.87			CAG-307	WQSK01	0.98	0.105922	0.894078
Berryella	Peribacillus_301373	0.98	0.0902686	0.909731			RUG13615	Peribacillus_301373	0.97	0.13	0.87			Caulobacter_487784	Williamsia_A	0.98	0.10615	0.89385
BX12	RUG521	0.98	0.0904794	0.909521			Bilifractor	Coprococcus_A_187866	0.97	0.13	0.87			Intestinimonas	Blautia_A_141781	0.98	0.106871	0.893129
Marvinbryantia	Pradoshia	0.98	0.0905328	0.909467			Anaerofilum_73741	CAG-1024	0.97	0.13	0.87			Lawsonibacter	Eisenbergiella	0.98	0.107257	0.892743
Nanosyncoccus	Pradoshia	0.98	0.0907343	0.909266			UBA4285	RUG13038	0.97	0.13	0.87			Alteromonas_F	Pelagibacter_A_533952	0.98	0.107454	0.892546
RUG521	Copromorpha	0.98	0.0910302	0.90897			Mogibacterium	UBA1367	0.97	0.13	0.87			Aquabacterium_A	VBCK01	0.98	0.107556	0.892444
Scybalousia	CAG-1427	0.98	0.0913273	0.908673			JC017	Eubacterium_T	0.97	0.13	0.87			FD2005	Collinsella	0.98	0.107887	0.892113
Marvinbryantia	Aureimonas_A_501548	0.98	0.0913676	0.908632			RUG472	Anaerofilum_73741	0.97	0.13	0.87			Haliangium_463188	VBCK01	0.98	0.108168	0.891832
Mailhella	Phascolarctobacterium_A	0.98	0.0916078	0.908392			UMGS1994	BX12	0.97	0.13	0.87			Emergencia	Ventrisoma	0.98	0.10854	0.89146
Pradoshia	CAG-1427	0.98	0.091664	0.908336			Psychrobacillus	Clostridium_T	0.96	0.13	0.87			UBA1067	Butyribacter	0.98	0.108914	0.891086
RUG705	Pradoshia	0.98	0.0916939	0.908306			RUG472	Peribacillus_301373	0.96	0.13	0.87			Reyranella	Brevundimonas	0.98	0.109125	0.890875
Arthrobacter_B	Berryella	0.98	0.0920056	0.907994			Psychrobacillus	Stenotrophomonas_A_615274	0.96	0.13	0.87			Anaerotignum_189125	Intestinimonas	0.98	0.11002	0.88998
DSXL01	Butyrivibrio_A_168226	0.98	0.0921117	0.907888			Stenotrophomonas_A_615274	Flavobacterium	0.96	0.13	0.87			Phocaeicola_A_858004	Paludicola	0.98	0.110181	0.889819
Pradoshia	Eubacterium_R	0.98	0.0921604	0.90784			Anaerofilum_73741	Eubacterium_T	0.96	0.13	0.87			Bradyrhizobium	Rothia	0.98	0.110416	0.889584
Butyrivibrio_A_168226	FD2005	0.98	0.092177	0.907823			UBA1427	UBA1711	0.96	0.13	0.87			UBA1402	F0058	0.98	0.110479	0.889521
Scybalousia	Bariatricus	0.98	0.0927523	0.907248			Turicibacter	RUG13038	0.96	0.13	0.87			Butyricicoccus_A_77030	Roseburia	0.98	0.110656	0.889344
Peribacillus_301373	Saccharofermentans	0.98	0.0928739	0.907126			UBA4285	JC017	0.96	0.13	0.87			WQSK01	UBA1402	0.98	0.110745	0.889255
Actinomyces	RUG521	0.98	0.0928977	0.907102			Eubacterium_I	QAMH01	0.96	0.14	0.86			Novosphingobium_485350	Taonella	0.98	0.110799	0.889201
UMGS1994	Saccharofermentans	0.98	0.0932001	0.9068			JC017	CAG-793	0.96	0.14	0.86			Reyranella	Aquabacterium_B_592457	0.98	0.11105	0.88895
Aureimonas_A_501548	Arthrobacter_B	0.98	0.0934274	0.906573			Methanobrevibacter_D_1148	Peribacillus_301373	0.96	0.14	0.86			Massilia	Caulobacter_487784	0.97	0.111864	0.888136
Arthrobacter_B	Saccharofermentans	0.98	0.0934277	0.906572			Choladousia	UMGS1994	0.96	0.14	0.86			Aquabacterium_A	Azorhizobium	0.97	0.112101	0.887899
Aureimonas_A_501548	Peribacillus_301373	0.98	0.0938754	0.906125			Mogibacterium	Turicibacter	0.96	0.14	0.86			UBA1402	Eubacterium_Q	0.97	0.112466	0.887534
UMGS1994	Pradoshia	0.98	0.0940726	0.905927			Peribacillus_301373	Eubacterium_T	0.96	0.14	0.86			CAG-873	CAG-605	0.97	0.112882	0.887118
Akkermansia	Christensenella	0.98	0.0942242	0.905776			Mogibacterium	Methanobrevibacter_D_1148	0.96	0.14	0.86			CAG-177	Lawsonibacter	0.97	0.113014	0.886986
Slackia_A	Scybalousia	0.98	0.0942726	0.905727			Choladousia	BX12	0.96	0.14	0.86			CAG-307	Eubacterium_Q	0.97	0.11308	0.88692
Arthrobacter_B	UBA2730	0.98	0.0947775	0.905222			JC017	Copromorpha	0.96	0.14	0.86			Lawsonibacter	Traorella	0.97	0.113621	0.886379
DSXL01	UBA2730	0.98	0.0948246	0.905175			UBA4285	Peribacillus_301373	0.96	0.14	0.86			Caulobacter_487784	Taonella	0.97	0.114171	0.885829
Peribacillus_301373	UBA2730	0.98	0.0951382	0.904862			Anaerofilum_73741	Methanobrevibacter_D_1148	0.96	0.14	0.86			Aquabacterium_A	Caulobacter_487784	0.97	0.114237	0.885763
Marvinbryantia	Saccharofermentans	0.98	0.0951521	0.904848			Anaerofilum_73741	JC017	0.96	0.14	0.86			Rubellimicrobium	QKMZ01	0.97	0.114491	0.885509
UMGS1994	FD2005	0.98	0.0952865	0.904713			RUG472	Mogibacterium	0.96	0.14	0.86			UBA1930	FD2005	0.97	0.11482	0.88518
Acinetobacter	Suipraeoptans	0.98	0.0953245	0.904675			RUG13038	CAG-1024	0.96	0.14	0.86			Emergencia	UBA7173	0.97	0.114931	0.885069
Romboutsia_B	CAG-793	0.98	0.0954725	0.904528			RUG13615	CAG-1024	0.96	0.14	0.86			Prevotella	Caproicibacterium	0.97	0.115353	0.884647
Slackia_A	Pradoshia	0.98	0.095648	0.904352			UBA1427	Coprenecus	0.96	0.14	0.86			Muricomes_149725	Treponema_F	0.97	0.115485	0.884515
Butyrivibrio_A_168226	RUG721	0.98	0.0958064	0.904194			Turicibacter	CAG-1024	0.96	0.14	0.86			Haliangium_463188	FD2005	0.97	0.116005	0.883995
Marvinbryantia	FD2005	0.98	0.0963384	0.903662			RUG13038	Eubacterium_T	0.96	0.14	0.86			Novosphingobium_485350	Collinsella	0.97	0.117058	0.882942
RUG705	Clostridium_N_143832	0.98	0.0968198	0.90318			RUG13615	Eubacterium_I	0.96	0.14	0.86			Clostridium_Q_135822	Traorella	0.97	0.1173	0.8827
Duncaniella	Eubacterium_R	0.98	0.0969207	0.903079			CAG-1024	Eubacterium_I	0.96	0.14	0.86			Reyranella	Rothia	0.97	0.117315	0.882685
RUG721	FD2005	0.98	0.0969817	0.903018			JC017	CAG-1024	0.96	0.14	0.86			Choladousia	Anaerobutyricum	0.97	0.117347	0.882653
FD2005	Copromorpha	0.98	0.0970274	0.902973			RUG472	RUG13038	0.96	0.14	0.86			Reyranella	UBA1930	0.97	0.117417	0.882583
Olsenella_H_405128	Berryella	0.98	0.0972968	0.902703			RUG13038	CAG-793	0.96	0.14	0.86			WRAI01	UBA2253	0.97	0.11762	0.88238
Bulleidia	Mogibacterium	0.98	0.0974884	0.902512			UBA4285	Eubacterium_I	0.96	0.14	0.86			Gabonibacter	Paludicola	0.97	0.117737	0.882263
BX12	Saccharofermentans	0.98	0.0975086	0.902491			Romboutsia_B	Eubacterium_I	0.96	0.14	0.86			Clostridium_Q_135822	Eisenbergiella	0.97	0.117763	0.882237
Acinetobacter	QAMH01	0.98	0.0975593	0.902441			Romboutsia_B	Copromorpha	0.96	0.14	0.86			Ralstonia	Massilia	0.97	0.118021	0.881979
BX12	Actinomyces	0.98	0.097703	0.902297			Anaerofilum_73741	Mogibacterium	0.96	0.14	0.86			CAG-194	UMGS1071	0.97	0.118292	0.881708
Berryella	Eubacterium_R	0.98	0.0977189	0.902281			Choladousia	FD2005	0.96	0.14	0.86			Harryflintia	Bariatricus	0.97	0.118318	0.881682
Duncaniella	Christensenella	0.98	0.0978062	0.902194			JC017	Clostridioides_A	0.96	0.14	0.86			Bradyrhizobium	UBA1930	0.97	0.118652	0.881348
Slackia_A	Nanosyncoccus	0.98	0.0980944	0.901906			CAG-1024	QAMH01	0.96	0.14	0.86			Emergencia	Blautia_A_141781	0.97	0.118823	0.881177
UBA636	Methanobrevibacter_A	0.98	0.098384	0.901616			Bulleidia	Bilifractor	0.96	0.14	0.86			Terrisporobacter	UBA1413	0.97	0.119568	0.880432
RUG705	CAG-1427	0.98	0.0985099	0.90149			JC017	Peribacillus_301373	0.96	0.14	0.86			Clostridium_T	Solibacillus	0.97	0.119841	0.880159
Aureimonas_A_501548	Akkermansia	0.98	0.0987286	0.901271			Mogibacterium	Clostridioides_A	0.96	0.14	0.86			Reyranella	Williamsia_A	0.97	0.120348	0.879652
Slackia_A	RUG721	0.98	0.0987832	0.901217			UBA3789	Methanobrevibacter_A	0.96	0.15	0.85			Brachybacterium	Brevundimonas	0.97	0.120502	0.879498
Olsenella_H_405128	UMGS1994	0.98	0.0987983	0.901202			UBA9715	Romboutsia_B	0.96	0.15	0.85			Massilia	Brevundimonas	0.97	0.121333	0.878667
Marvinbryantia	RUG721	0.98	0.0988323	0.901168			Turicibacter	Eubacterium_I	0.96	0.15	0.85			CAG-964	UBA1427	0.97	0.12143	0.87857
Hornefia	Eubacterium_R	0.98	0.0991699	0.90083			RUG13038	Methanobrevibacter_D_1148	0.96	0.15	0.85			CAG-1000	Paludicola	0.97	0.121904	0.878096
Aureimonas_A_501548	Duncaniella	0.98	0.0991944	0.900806			Mogibacterium	Eubacterium_I	0.96	0.15	0.85			Aquabacterium_A	Adlercreutzia_404257	0.97	0.122001	0.877999
Slackia_A	Copromorpha	0.98	0.0992727	0.900727			Romboutsia_B	UBA1367	0.95	0.15	0.85			CAG-177	UMGS1071	0.97	0.122209	0.877791
Suipraeoptans	Peribacillus_301373	0.98	0.0993319	0.900668			Adlercreutzia_404199	Coprococcus_A_187866	0.95	0.15	0.85			Treponema_D	Prevotella	0.97	0.122379	0.877621
Escherichia_710834	Eubacterium_Q	0.98	0.0997674	0.900233			CAG-1427	FD2005	0.95	0.15	0.85			Emergencia	Intestinimonas	0.97	0.122718	0.877282
DSXL01	Eubacterium_R	0.98	0.0998337	0.900166			JC017	Turicibacter	0.95	0.15	0.85			Harryflintia	Anaerotignum_189125	0.97	0.122778	0.877222
Arthrobacter_B	Suipraeoptans	0.98	0.0999741	0.900026			Anaerofilum_73741	Turicibacter	0.95	0.15	0.85			Reyranella	Aquabacterium_A	0.97	0.123262	0.876738
DSXL01	UMGS1994	0.98	0.100106	0.899894			RUG13615	Psychrobacillus	0.95	0.15	0.85			Bradyrhizobium	Aquabacterium_B_592457	0.97	0.123317	0.876683
Berryella	QAMH01	0.98	0.100268	0.899732			Psychrobacillus	QAMH01	0.95	0.15	0.85			Lawsonibacter	Anaerotignum_189125	0.97	0.123356	0.876644
Bariatricus	RUG12438	0.98	0.100335	0.899665			UBA4285	CAG-1024	0.95	0.15	0.85			Enterousia	UBA1067	0.97	0.123434	0.876566
RUG721	Akkermansia	0.98	0.100446	0.899554			Psychrobacillus	Methanobrevibacter_D_1148	0.95	0.15	0.85			Eubacterium_Q	1XD42-69	0.97	0.123455	0.876545
UBA3789	Nanosyncoccus	0.98	0.100616	0.899384			Marvinbryantia	Streptococcus	0.95	0.15	0.85			Adlercreutzia_404257	Williamsia_A	0.97	0.123766	0.876234
Marvinbryantia	UBA2730	0.98	0.100647	0.899353			Romboutsia_B	CAG-1024	0.95	0.15	0.85			VBCK01	Caulobacter_487784	0.97	0.123871	0.876129
Eubacterium_R	FD2005	0.98	0.100754	0.899246			RUG472	CAG-1024	0.95	0.15	0.85			Clostridium_Q_135822	Scatoplasma	0.97	0.123976	0.876024
Actinomyces	Saccharofermentans	0.98	0.100771	0.899229			Anaerofilum_73741	CAG-793	0.95	0.15	0.85			Bariatricus	Intestinimonas	0.97	0.124403	0.875597
Aureimonas_A_501548	UMGS1994	0.98	0.10097	0.89903			Stenotrophomonas_A_615274	Methanobrevibacter_D_1148	0.95	0.15	0.85			VBCK01	Brachybacterium	0.97	0.124633	0.875367
Christensenella	UBA2730	0.98	0.101055	0.898945			Bulleidia	Raoultibacter	0.95	0.15	0.85			Turicibacter	Clostridioides_A	0.97	0.12468	0.87532
Acinetobacter	Peribacillus_301373	0.98	0.101115	0.898885			Peribacillus_301373	Escherichia_710834	0.95	0.15	0.85			Clostridium_Q_135822	Ventrisoma	0.97	0.124766	0.875234
Adlercreutzia_404218	BX12	0.98	0.101547	0.898453			RUG472	Eubacterium_I	0.95	0.15	0.85			Bradyrhizobium	Massilia	0.97	0.124898	0.875102
Arthrobacter_B	Acinetobacter	0.98	0.101577	0.898423			Anaeroplasma	CAG-307	0.95	0.15	0.85			Ventrisoma	Lawsonibacter	0.97	0.124997	0.875003
Butyrivibrio_A_168226	UBA2730	0.98	0.10162	0.89838			Adlercreutzia_404199	Bilifractor	0.95	0.15	0.85			Adlercreutzia_404257	Aquabacterium_B_592457	0.97	0.125337	0.874663
UMGS1994	Acinetobacter	0.98	0.101862	0.898138			UBA4285	Psychrobacillus	0.95	0.16	0.84			Scatocola	UBA1402	0.97	0.125441	0.874559
Slackia_A	Clostridium_N_143832	0.98	0.102019	0.897981			JC017	RUG13038	0.95	0.16	0.84			Prevotella	1XD42-69	0.97	0.125684	0.874316
DSXL01	Duncaniella	0.98	0.102182	0.897818			Psychrobacillus	Eubacterium_T	0.95	0.16	0.84			Choladousia	Lawsonibacter	0.97	0.125692	0.874308
Christensenella	RUG521	0.98	0.102335	0.897665			Eubacterium_I	Eubacterium_T	0.95	0.16	0.84			Massilia	Taonella	0.97	0.126118	0.873882
BX12	Suipraeoptans	0.98	0.103103	0.896897			Romboutsia_B	Clostridioides_A	0.95	0.16	0.84			Treponema_D	UBA1402	0.97	0.126356	0.873644
RUG721	Eubacterium_R	0.98	0.103124	0.896876			RUG472	Psychrobacillus	0.95	0.16	0.84			Scatocola	F0058	0.97	0.12639	0.87361
Mogibacterium	CAG-273	0.98	0.103137	0.896863			RUG472	Stenotrophomonas_A_615274	0.95	0.16	0.84			Brachybacterium	Ralstonia	0.97	0.126502	0.873498
Aureimonas_A_501548	Saccharofermentans	0.98	0.103584	0.896416			Stenotrophomonas_A_615274	Eubacterium_T	0.95	0.16	0.84			Bradyrhizobium	Williamsia_A	0.97	0.126986	0.873014
Bulleidia	Copromorpha	0.98	0.103591	0.896409			UBA4285	Stenotrophomonas_A_615274	0.95	0.16	0.84			Emergencia	Anaerotignum_189125	0.97	0.127563	0.872437
Mogibacterium	Eubacterium_I	0.98	0.103749	0.896251			Romboutsia_B	QAMH01	0.95	0.16	0.84			Ventrisoma	Bariatricus	0.97	0.12768	0.87232
DSXL01	Arthrobacter_B	0.98	0.103765	0.896235			CAG-1024	Eubacterium_T	0.95	0.16	0.84			Gabonibacter	UBA7173	0.97	0.128218	0.871782
Mogibacterium	Copromorpha	0.98	0.103769	0.896231			Raoultibacter	UBA636	0.95	0.16	0.84			Intestinimonas	Scatoplasma	0.97	0.128279	0.871721
RUG705	Copromorpha	0.98	0.103797	0.896203			Methanobrevibacter_D_1148	CAG-1024	0.95	0.16	0.84			CAG-196	1XD42-69	0.97	0.129268	0.870732
Slackia_A	CAG-1427	0.98	0.103891	0.896109			Stenotrophomonas_A_615274	QAMH01	0.95	0.16	0.84			Treponema_D	CAG-307	0.97	0.129658	0.870342
Butyrivibrio_A_168226	Suipraeoptans	0.98	0.103948	0.896052			CAG-1024	CAG-793	0.95	0.16	0.84			Azorhizobium	Brachybacterium	0.97	0.129759	0.870241
Paramuribaculum	UBA71	0.98	0.103989	0.896011			Emergencia	UMGS1994	0.95	0.16	0.84			CAG-177	Anaerotignum_189125	0.97	0.12994	0.87006
RUG13615	Suipraeoptans	0.98	0.104183	0.895817			RUG13615	Stenotrophomonas_A_615274	0.95	0.16	0.84			Bacillus_AD	Solibacillus	0.97	0.130154	0.869846
DSXL01	Saccharofermentans	0.98	0.104356	0.895644			RUG13038	Romboutsia_B	0.95	0.16	0.84			CAG-177	Blautia_A_141781	0.97	0.1303	0.8697
Akkermansia	Duncaniella	0.98	0.104409	0.895591			Psychrobacillus	UBA9715	0.95	0.16	0.84			Eubacterium_R	Solibacillus	0.97	0.130387	0.869613
RUG521	FD2005	0.98	0.104478	0.895522			Clostridium_T	Peribacillus_301373	0.95	0.16	0.84			Taonella	FD2005	0.97	0.130463	0.869537
DSXL01	Peribacillus_301373	0.98	0.104592	0.895408			Psychrobacillus	UBA1367	0.95	0.16	0.84			Emergencia	Traorella	0.97	0.13055	0.86945
Adlercreutzia_404218	RUG521	0.98	0.105109	0.894891			Clostridium_T	JC017	0.95	0.16	0.84			CAG-1000	Traorella	0.97	0.131107	0.868893
Slackia_A	Mogibacterium	0.98	0.105309	0.894691			Bilifractor	UBA636	0.95	0.16	0.84			JC017	Collinsella	0.97	0.131197	0.868803
Olsenella_H_405128	QAMH01	0.98	0.105336	0.894664			RUG13615	Romboutsia_B	0.95	0.16	0.84			WQSK01	Prevotella	0.97	0.131753	0.868247
Acinetobacter	Berryella	0.98	0.105569	0.894431			CAG-1024	Clostridioides_A	0.95	0.16	0.84			Adlercreutzia_404257	Taonella	0.97	0.132286	0.867714
Nanosyncoccus	BX12	0.98	0.105647	0.894353			UBA4285	Romboutsia_B	0.95	0.16	0.84			Harryflintia	Traorella	0.96	0.132881	0.867119
Pradoshia	Saccharofermentans	0.98	0.105767	0.894233			Choladousia	Emergencia	0.95	0.16	0.84			Azorhizobium	Taonella	0.96	0.133292	0.866708
Clostridium_N_143832	CAG-273	0.98	0.105973	0.894027			Methanobrevibacter_D_1148	Eubacterium_I	0.95	0.16	0.84			Novosphingobium_485350	VBCK01	0.96	0.134165	0.865835
UBA3789	BX12	0.98	0.10615	0.89385			Methanobrevibacter_A	Eubacterium_I	0.95	0.16	0.84			Harryflintia	CAG-194	0.96	0.134379	0.865621
Bulleidia	CAG-1427	0.98	0.106453	0.893547			Psychrobacillus	Turicibacter	0.95	0.16	0.84			Bilifractor	Thermophilibacter	0.96	0.134454	0.865546
Adlercreutzia_404218	Saccharofermentans	0.98	0.106553	0.893447			Marvinbryantia	Ruminococcus_C_58660	0.95	0.17	0.83			Novosphingobium_485350	Brevundimonas	0.96	0.134865	0.865135
Olsenella_H_405128	RUG13615	0.98	0.106899	0.893101			CAG-793	Eubacterium_I	0.95	0.17	0.83			Azorhizobium	Rothia	0.96	0.134932	0.865068
BX12	RUG705	0.98	0.106958	0.893042			UBA9715	Methanobrevibacter_A	0.95	0.17	0.83			CAG-605	Phocaeicola_A_858004	0.96	0.135062	0.864938
UMGS1994	UBA2730	0.98	0.106998	0.893002			Psychrobacillus	Copromorpha	0.94	0.17	0.83			Mobilitalea	Enterousia	0.96	0.135091	0.864909
RUG721	Mogibacterium	0.98	0.107229	0.892771			Peribacillus_301373	Clostridioides_A	0.94	0.17	0.83			CAG-194	UBA7173	0.96	0.135101	0.864899
UMGS1994	QAMH01	0.98	0.107454	0.892546			Peribacillus_301373	Eubacterium_I	0.94	0.17	0.83			CAG-267	Scatocola	0.96	0.135308	0.864692
DSXL01	Bulleidia	0.98	0.107673	0.892327			Methanobrevibacter_A	Copromorpha	0.94	0.17	0.83			Prevotella	UBA1402	0.96	0.135437	0.864563
Butyrivibrio_A_168226	Saccharofermentans	0.98	0.107678	0.892322			Anaerofilum_73741	Clostridium_T	0.94	0.17	0.83			CAG-1252	UBA1427	0.96	0.135444	0.864556
UMGS1994	RUG721	0.98	0.107775	0.892225			Peribacillus_301373	CAG-793	0.94	0.17	0.83			Harryflintia	Intestinimonas	0.96	0.13606	0.86394
Scybalousia	RUG12438	0.98	0.108162	0.891838			Anaerofilum_73741	Clostridioides_A	0.94	0.17	0.83			Emergencia	Anaerobutyricum	0.96	0.136084	0.863916
Clostridium_N_143832	Bariatricus	0.98	0.108346	0.891654			Bulleidia	Adlercreutzia_404199	0.94	0.17	0.83			Brachybacterium	Collinsella	0.96	0.136256	0.863744
JC017	Anaerofustis	0.98	0.108356	0.891644			UMGS1994	FD2005	0.94	0.17	0.83			CAG-307	1XD42-69	0.96	0.136804	0.863196
Thermophilibacter	Eubacterium_I	0.98	0.108369	0.891631			Stenotrophomonas_A_615274	UBA1367	0.94	0.17	0.83			Adlercreutzia_404257	UBA1930	0.96	0.136977	0.863023
UBA3789	CAG-1427	0.98	0.108555	0.891445			Clostridium_T	Flavobacterium	0.94	0.17	0.83			Rothia	Caulobacter_487784	0.96	0.137015	0.862985
BX12	Christensenella	0.98	0.108645	0.891355			Psychrobacillus	Clostridioides_A	0.94	0.17	0.83			Anaerobutyricum	Anaerotignum_189125	0.96	0.137556	0.862444
Nanosyncoccus	Copromorpha	0.98	0.108688	0.891312			Eubacterium_R	FD2005	0.94	0.17	0.83			UMGS1071	Blautia_A_141781	0.96	0.13847	0.86153
BX12	FD2005	0.98	0.108753	0.891247			Clostridium_T	Mogibacterium	0.94	0.17	0.83			Slackia_A	Breznakia	0.96	0.139007	0.860993
Aureimonas_A_501548	Eubacterium_R	0.98	0.1089	0.8911			RUG13038	Clostridioides_A	0.94	0.17	0.83			Clostridium_Q_135822	Intestinimonas	0.96	0.13974	0.86026
Berryella	Actinomyces	0.98	0.108953	0.891047			CAG-269	FD2005	0.94	0.17	0.83			Brachybacterium	Caulobacter_487784	0.96	0.139765	0.860235
CAG-273	Copromorpha	0.98	0.109184	0.890816			Turicibacter	Peribacillus_301373	0.94	0.17	0.83			CAG-964	UBA1436	0.96	0.139887	0.860113
Berryella	Copromorpha	0.98	0.109227	0.890773			Stenotrophomonas_A_615274	UBA9715	0.94	0.17	0.83			Clostridium_Q_135822	Lawsonibacter	0.96	0.140311	0.859689
Akkermansia	UBA2730	0.98	0.109232	0.890768			Coprococcus_A_187866	Romboutsia_B	0.94	0.17	0.83			Harryflintia	Blautia_A_141781	0.96	0.14034	0.85966
Eubacterium_R	Saccharofermentans	0.98	0.109272	0.890728			Mogibacterium	JC017	0.94	0.17	0.83			Caproicibacterium	F0058	0.96	0.140784	0.859216
Mogibacterium	CAG-1427	0.98	0.109287	0.890713			Mogibacterium	Peribacillus_301373	0.94	0.17	0.83			Ventrisoma	Harryflintia	0.96	0.141341	0.858659
Akkermansia	Copromorpha	0.98	0.109514	0.890486			Coprococcus_A_187866	Eubacterium_I	0.94	0.17	0.83			CAG-1000	Scatoplasma	0.96	0.141437	0.858563
UBA4285	JC017	0.98	0.109614	0.890386			Adlercreutzia_404199	Eubacterium_I	0.94	0.17	0.83			WG-1	UBA1436	0.96	0.14161	0.85839
BX12	CAG-1427	0.98	0.109674	0.890326			UMGS1994	Eubacterium_R	0.94	0.17	0.83			CAG-307	Scatocola	0.96	0.141823	0.858177
Clostridium_N_143832	Copromorpha	0.98	0.109839	0.890161			Streptococcus	Ruminococcus_C_58660	0.94	0.17	0.83			Coprosoma	Ruminococcus_E	0.96	0.141925	0.858075
Peribacillus_301373	FD2005	0.98	0.10995	0.89005			Bulleidia	UBA636	0.94	0.18	0.82			Harryflintia	UMGS1071	0.96	0.142633	0.857367
DSXL01	RUG721	0.98	0.110644	0.889356			Raoultibacter	Thermophilibacter	0.94	0.18	0.82			Ruminococcus_E	WG-1	0.96	0.142681	0.857319
Arthrobacter_B	FD2005	0.98	0.110723	0.889277			UBA6984	UBA2813	0.94	0.18	0.82			Limenecus	UBA6984	0.96	0.142888	0.857112
Peribacillus_301373	Copromorpha	0.98	0.11156	0.88844			RUG472	Romboutsia_B	0.94	0.18	0.82			CAG-177	Ventrisoma	0.96	0.14311	0.85689
Suipraeoptans	Akkermansia	0.98	0.111712	0.888288			Clostridium_T	Eubacterium_I	0.94	0.18	0.82			Caulobacter_487784	Corynebacterium	0.96	0.143347	0.856653
Butyrivibrio_A_168226	Copromorpha	0.98	0.111756	0.888244			CAG-307	UBA71	0.94	0.18	0.82			Reyranella	Brachybacterium	0.96	0.143631	0.856369
Arthrobacter_B	Copromorpha	0.97	0.112105	0.887895			Romboutsia_B	Eubacterium_T	0.94	0.18	0.82			Bradyrhizobium	Aquabacterium_A	0.96	0.143755	0.856245
CAG-1427	Eubacterium_R	0.97	0.112192	0.887808			Peribacillus_301373	CAG-1024	0.94	0.18	0.82			VBCK01	Rubellimicrobium	0.96	0.143809	0.856191
Butyrivibrio_A_168226	BX12	0.97	0.112437	0.887563			Stenotrophomonas_A_615274	Copromorpha	0.94	0.18	0.82			Mobilitalea	Caproicibacterium	0.96	0.144045	0.855955
UBA3789	Pradoshia	0.97	0.112474	0.887526			UBA636	Coprococcus_A_187866	0.93	0.18	0.82			43-108	Caproicibacterium	0.96	0.144084	0.855916
Adlercreutzia_404218	Berryella	0.97	0.112565	0.887435			Anaerofilum_73741	Escherichia_710834	0.93	0.18	0.82			Paracoccus	Ralstonia	0.96	0.144237	0.855763
Berryella	Saccharofermentans	0.97	0.112689	0.887311			JC017	Eubacterium_I	0.93	0.18	0.82			Novosphingobium_485350	Ralstonia	0.96	0.145117	0.854883
Frigoribacterium	RUG721	0.97	0.112714	0.887286			Methanobrevibacter_A	UBA1367	0.93	0.18	0.82			CAG-1252	UBA1436	0.96	0.145145	0.854855
Methylobacterium	Turicibacter	0.97	0.112781	0.887219			Emergencia	CAG-1427	0.93	0.18	0.82			CAG-177	Scatoplasma	0.96	0.145334	0.854666
Slackia_A	BX12	0.97	0.113068	0.886932			Clostridium_T	RUG13038	0.93	0.18	0.82			Azorhizobium	VBCK01	0.96	0.14622	0.85378
Marvinbryantia	Olsenella_H_405128	0.97	0.113214	0.886786			Mogibacterium	Romboutsia_B	0.93	0.18	0.82			UBA1402	1XD42-69	0.96	0.146815	0.853185
Berryella	Pradoshia	0.97	0.113322	0.886678			Mogibacterium	CAG-1024	0.93	0.18	0.82			Cryptobacteroides	Faecalibacterium	0.96	0.147269	0.852731
RUG721	CAG-1427	0.97	0.113462	0.886538			Methanobrevibacter_D_1148	Romboutsia_B	0.93	0.18	0.82			Azorhizobium	Novosphingobium_485350	0.96	0.147788	0.852212
Hornefia	Copromorpha	0.97	0.113624	0.886376			Anaeroplasma	RUG350	0.93	0.19	0.81			QALR01	RUG13077	0.96	0.148109	0.851891
DSXL01	Frigoribacterium	0.97	0.113936	0.886064			Raoultibacter	Eubacterium_I	0.93	0.19	0.81			Ralstonia	Corynebacterium	0.96	0.148505	0.851495
Frigoribacterium	FD2005	0.97	0.114004	0.885996			Stenotrophomonas_A_615274	Clostridioides_A	0.93	0.19	0.81			Lawsonibacter	Scatoplasma	0.96	0.148603	0.851397
Choladousia	Turicibacter	0.97	0.114401	0.885599			Stenotrophomonas_A_615274	CAG-793	0.93	0.19	0.81			CAG-267	Zag111	0.96	0.148656	0.851344
Akkermansia	Saccharofermentans	0.97	0.11441	0.88559			Clostridioides_A	Eubacterium_I	0.93	0.19	0.81			UMGS1071	Intestinimonas	0.96	0.14896	0.85104
Pradoshia	RUG521	0.97	0.114464	0.885536			Mogibacterium	Methanobrevibacter_A	0.93	0.19	0.81			CAG-177	Harryflintia	0.96	0.149101	0.850899
Suipraeoptans	FD2005	0.97	0.114623	0.885377			Cellulosilyticum	UBA2212	0.93	0.19	0.81			Coprosoma	G11	0.96	0.149213	0.850787
Arthrobacter_B	QAMH01	0.97	0.114643	0.885357			Psychrobacillus	CAG-793	0.93	0.19	0.81			Choladousia	Anaerotignum_189125	0.96	0.149244	0.850756
RUG521	Saccharofermentans	0.97	0.11467	0.88533			Christensenella	Terrisporobacter	0.93	0.19	0.81			Anaerobutyricum	Harryflintia	0.96	0.149277	0.850723
Hornefia	CAG-1427	0.97	0.114677	0.885323			BX12	CAG-1427	0.93	0.19	0.81			Gabonibacter	Harryflintia	0.96	0.149468	0.850532
Butyrivibrio_A_168226	Acinetobacter	0.97	0.114701	0.885299			Choladousia	Eubacterium_R	0.93	0.19	0.81			UBA1394	C-53	0.96	0.149954	0.850046
Olsenella_H_405128	Eubacterium_R	0.97	0.114731	0.885269			Adlercreutzia_404199	Thermophilibacter	0.93	0.19	0.81			PeH17	Stercorousia	0.95	0.150027	0.849973
Acinetobacter	Actinomyces	0.97	0.114884	0.885116			Psychrobacillus	Anaerofilum_73741	0.93	0.19	0.81			Reyranella	Taonella	0.95	0.150048	0.849952
Frigoribacterium	Saccharofermentans	0.97	0.115046	0.884954			Thermophilibacter	Eubacterium_I	0.93	0.19	0.81			Prevotella	Eubacterium_Q	0.95	0.150097	0.849903
Acinetobacter	Duncaniella	0.97	0.115097	0.884903			Anaerosacchariphilus	Solibacillus	0.93	0.19	0.81			Gabonibacter	Anaerotignum_189125	0.95	0.150458	0.849542
Peribacillus_301373	QAMH01	0.97	0.115257	0.884743			Anaerofilum_73741	Romboutsia_B	0.93	0.19	0.81			Ventrisoma	Blautia_A_141781	0.95	0.150598	0.849402
Suipraeoptans	Pradoshia	0.97	0.115395	0.884605			Clostridium_T	CAG-1024	0.92	0.19	0.81			Bradyrhizobium	Corynebacterium	0.95	0.150741	0.849259
Scybalousia	CAG-710	0.97	0.115441	0.884559			Psychrobacillus	Eubacterium_I	0.92	0.19	0.81			VBCK01	Massilia	0.95	0.150933	0.849067
Duncaniella	QAMH01	0.97	0.115465	0.884535			Romboutsia_B	CAG-793	0.92	0.19	0.81			Bradyrhizobium	Taonella	0.95	0.150973	0.849027
Eubacterium_R	UBA2730	0.97	0.115468	0.884532			Stenotrophomonas_A_615274	Turicibacter	0.92	0.19	0.81			PeH17	RUG13077	0.95	0.151555	0.848445
RUG721	Berryella	0.97	0.115565	0.884435			BX12	CAG-269	0.92	0.2	0.8			Haliangium_463188	Paracoccus	0.95	0.152299	0.847701
Butyrivibrio_A_168226	Frigoribacterium	0.97	0.115648	0.884352			Escherichia_710834	Methanobrevibacter_A	0.92	0.2	0.8			Adlercreutzia_404257	VBCK01	0.95	0.152602	0.847398
UBA3789	RUG721	0.97	0.115865	0.884135			Psychrobacillus	Flavobacterium	0.92	0.2	0.8			CAG-314	Stercorousia	0.95	0.152633	0.847367
Marvinbryantia	QAMH01	0.97	0.115981	0.884019			RUG13038	Thermophilibacter	0.92	0.2	0.8			Adlercreutzia_404257	Massilia	0.95	0.152647	0.847353
Suipraeoptans	Duncaniella	0.97	0.116088	0.883912			Methanobrevibacter_A	QAMH01	0.92	0.2	0.8			Rothia	Corynebacterium	0.95	0.152915	0.847085
DSXL01	BX12	0.97	0.116249	0.883751			Bulleidia	Thermophilibacter	0.92	0.2	0.8			Stercorousia	RUG13077	0.95	0.153391	0.846609
Slackia_A	UBA3789	0.97	0.116572	0.883428			Eubacterium_R	CAG-269	0.92	0.2	0.8			Mobilitalea	Prevotella	0.95	0.153603	0.846397
Aureimonas_A_501548	BX12	0.97	0.116732	0.883268			Bulleidia	Coprococcus_A_187866	0.92	0.2	0.8			Bacteroides_H	1XD42-69	0.95	0.153895	0.846105
Aureimonas_A_501548	RUG721	0.97	0.116822	0.883178			Stenotrophomonas_A_615274	Eubacterium_I	0.92	0.2	0.8			CAG-873	Paludicola	0.95	0.15429	0.84571
Adlercreutzia_404199	UBA9715	0.97	0.116948	0.883052			CAG-1427	CAG-269	0.92	0.2	0.8			VBCK01	FD2005	0.95	0.154521	0.845479
Frigoribacterium	Copromorpha	0.97	0.117007	0.882993			Psychrobacillus	Peribacillus_301373	0.92	0.2	0.8			G11	RUG762	0.95	0.154531	0.845469
Berryella	Duncaniella	0.97	0.117572	0.882428			Stenotrophomonas_A_615274	Escherichia_710834	0.92	0.2	0.8			Clostridium_T	Neobacillus	0.95	0.15465	0.84535
Aureimonas_A_501548	Frigoribacterium	0.97	0.117614	0.882386			RUG13615	Methanobrevibacter_A	0.92	0.2	0.8			CAG-605	UBA7173	0.95	0.15507	0.84493
Marvinbryantia	Acinetobacter	0.97	0.117843	0.882157			UMGS1994	CAG-269	0.92	0.21	0.79			Gabonibacter	Limiplasma	0.95	0.1555	0.8445
DSXL01	Copromorpha	0.97	0.117946	0.882054			UBA1067	Terrisporobacter	0.91	0.21	0.79			Limiplasma	Paludicola	0.95	0.155608	0.844392
DSXL01	Pradoshia	0.97	0.117963	0.882037			Romboutsia_B	Thermophilibacter	0.91	0.21	0.79			Prevotella	Scatocola	0.95	0.155706	0.844294
Olsenella_H_405128	BX12	0.97	0.118963	0.881037			Dysosmobacter	Lawsonibacter	0.91	0.21	0.79			RF16	Caproicibacterium	0.95	0.155889	0.844111
Marvinbryantia	Hornefia	0.97	0.11899	0.88101			UBA4285	Methanobrevibacter_A	0.91	0.21	0.79			Emergencia	Scatoplasma	0.95	0.156233	0.843767
BX12	RUG721	0.97	0.119315	0.880685			Stenotrophomonas_A_615274	Peribacillus_301373	0.91	0.21	0.79			Haliangium_463188	Adlercreutzia_404257	0.95	0.156655	0.843345
RUG13615	Berryella	0.97	0.119924	0.880076			Anaerofilum_73741	Stenotrophomonas_A_615274	0.91	0.21	0.79			Mobilitalea	F0058	0.95	0.157022	0.842978
Christensenella	Copromorpha	0.97	0.120019	0.879981			Coprococcus_A_187866	Thermophilibacter	0.91	0.21	0.79			Emergencia	Clostridium_Q_135822	0.95	0.157048	0.842952
Pradoshia	Akkermansia	0.97	0.120178	0.879822			Psychrobacillus	CAG-1024	0.91	0.21	0.79			CAG-1000	Harryflintia	0.95	0.157277	0.842723
UBA3789	Adlercreutzia_404218	0.97	0.12044	0.87956			Raoultibacter	Romboutsia_B	0.91	0.21	0.79			Traorella	Blautia_A_141781	0.95	0.15749	0.84251
Frigoribacterium	Akkermansia	0.97	0.120477	0.879523			JC017	Romboutsia_B	0.91	0.21	0.79			Bradyrhizobium	VBCK01	0.95	0.1581	0.8419
Mogibacterium	Scybalousia	0.97	0.120483	0.879517			BICA1-8	Limiplasma	0.91	0.21	0.79			UBA5905	Adlercreutzia_404199	0.95	0.158105	0.841895
DSXL01	Akkermansia	0.97	0.120508	0.879492			CAG-196	UBA1436	0.91	0.21	0.79			Peptostreptococcus	Fusobacterium_B	0.95	0.158448	0.841552
Marvinbryantia	CAG-1427	0.97	0.120731	0.879269			Psychrobacillus	Mogibacterium	0.91	0.21	0.79			FD2005	Brevundimonas	0.95	0.158514	0.841486
RUG13615	Copromorpha	0.97	0.120765	0.879235			UBA636	Thermophilibacter	0.91	0.21	0.79			Bariatricus	Traorella	0.95	0.158694	0.841306
Mogibacterium	Clostridium_N_143832	0.97	0.120906	0.879094			Stenotrophomonas_A_615274	JC017	0.91	0.21	0.79			CAG-196	WQSK01	0.95	0.158975	0.841025
UBA3789	Marvinbryantia	0.97	0.121039	0.878961			DSXL01	Bilifractor	0.91	0.21	0.79			CAG-273	Ruthenibacterium	0.95	0.159208	0.840792
Saccharofermentans	Copromorpha	0.97	0.121044	0.878956			Bilifractor	Thermophilibacter	0.91	0.21	0.79			Treponema_D	F0058	0.95	0.159694	0.840306
Olsenella_H_405128	Peribacillus_301373	0.97	0.12106	0.87894			UBA3789	RUG13038	0.91	0.21	0.79			Novosphingobium_485350	Caulobacter_487784	0.95	0.159872	0.840128
Frigoribacterium	Pradoshia	0.97	0.121303	0.878697			Thermophilibacter	Methanobrevibacter_A	0.91	0.21	0.79			UBA7173	Paludicola	0.95	0.159939	0.840061
UMGS1994	Hornefia	0.97	0.121386	0.878614			Anaerofilum_73741	Thermophilibacter	0.91	0.21	0.79			Aquabacterium_A	Collinsella	0.95	0.160247	0.839753
UBA3789	DSXL01	0.97	0.121399	0.878601			RUG472	Flavobacterium	0.91	0.21	0.79			Anaerobutyricum	Intestinimonas	0.95	0.160525	0.839475
Mogibacterium	RUG705	0.97	0.121487	0.878513			Methanobrevibacter_A	Eubacterium_T	0.91	0.21	0.79			Acinetobacter	QKMZ01	0.95	0.160735	0.839265
Butyrivibrio_A_168226	Bulleidia	0.97	0.121545	0.878455			CAG-1024	Methanobrevibacter_A	0.91	0.21	0.79			Williamsia_A	Collinsella	0.95	0.161086	0.838914
Mogibacterium	CAG-710	0.97	0.121816	0.878184			Clostridium_T	Romboutsia_B	0.91	0.21	0.79			Bulleidia	CAG-95	0.95	0.161116	0.838884
Pradoshia	Peribacillus_301373	0.97	0.121951	0.878049			Psychrobacillus	RUG13038	0.91	0.21	0.79			Enterousia	1XD42-69	0.95	0.161619	0.838381
Olsenella_H_405128	Arthrobacter_B	0.97	0.122161	0.877839			Emergencia	CAG-269	0.91	0.21	0.79			Adlercreutzia_404199	UBA3207	0.95	0.162042	0.837958
BICA1-8	RUG12438	0.97	0.122211	0.877789			CAG-1427	Eubacterium_R	0.91	0.21	0.79			Adlercreutzia_404257	Collinsella	0.95	0.162195	0.837805
DSXL01	RUG521	0.97	0.122349	0.877651			JC017	Methanobrevibacter_A	0.91	0.21	0.79			Bradyrhizobium	Brachybacterium	0.95	0.162476	0.837524
Thermophilibacter	QAMH01	0.97	0.122755	0.877245			Emergencia	Neobittarella	0.91	0.21	0.79			Choladousia	Intestinimonas	0.95	0.162482	0.837518
RUG721	RUG521	0.97	0.122771	0.877229			RUG472	Methanobrevibacter_A	0.91	0.21	0.79			WQSK01	F0058	0.95	0.162525	0.837475
Marvinbryantia	Frigoribacterium	0.97	0.122835	0.877165			UBA3789	Peribacillus_301373	0.91	0.21	0.79			Acinetobacter	Corynebacterium	0.95	0.162563	0.837437
UBA1066	Acinetobacter	0.97	0.123293	0.876707			UBA3830	Zag111	0.91	0.21	0.79			Paracoccus	Massilia	0.95	0.162609	0.837391
UBA3789	RUG705	0.97	0.123363	0.876637			Neobittarella	FD2005	0.91	0.22	0.78			Fusobacterium_A	Peptostreptococcus	0.95	0.162708	0.837292
Methylobacterium	Romboutsia_B	0.97	0.123376	0.876624			Marvinbryantia	BICA1-8	0.91	0.22	0.78			QKMZ01	Corynebacterium	0.95	0.162802	0.837198
UBA3789	Aureimonas_A_501548	0.97	0.123406	0.876594			UBA9715	Escherichia_710834	0.91	0.22	0.78			Anaerobutyricum	Bariatricus	0.95	0.163113	0.836887
Arthrobacter_B	Pradoshia	0.97	0.123425	0.876575			Adlercreutzia_404199	RUG13038	0.91	0.22	0.78			Thermophilibacter	Mediterraneibacter_A_155507	0.95	0.163153	0.836847
Slackia_A	FD2005	0.97	0.123582	0.876418			BICA1-8	Streptococcus	0.91	0.22	0.78			Reyranella	Novosphingobium_485350	0.95	0.163191	0.836809
Berryella	Christensenella	0.97	0.123626	0.876374			Coprosoma	Mogibacterium	0.91	0.22	0.78			CAG-1000	Eisenbergiella	0.95	0.163224	0.836776
BX12	Clostridium_N_143832	0.97	0.123678	0.876322			RUG13038	Escherichia_710834	0.91	0.22	0.78			CAG-196	UBA1067	0.95	0.163463	0.836537
Christensenella	QAMH01	0.97	0.123737	0.876263			Methanobrevibacter_D_1148	Methanobrevibacter_A	0.9	0.22	0.78			Bariatricus	UBA7173	0.95	0.163706	0.836294
Akkermansia	QAMH01	0.97	0.124183	0.875817			Stenotrophomonas_A_615274	Mogibacterium	0.9	0.22	0.78			Rubellimicrobium	Taonella	0.95	0.163728	0.836272
Nanosyncoccus	CAG-710	0.97	0.124314	0.875686			Choladousia	CAG-1427	0.9	0.22	0.78			Paracoccus	Brevundimonas	0.95	0.163779	0.836221
Bariatricus	CAG-710	0.97	0.124531	0.875469			Choladousia	CAG-269	0.9	0.22	0.78			CAG-196	Treponema_D	0.95	0.164003	0.835997
Nanosyncoccus	Eubacterium_R	0.97	0.124574	0.875426			Psychrobacillus	JC017	0.9	0.22	0.78			Emergencia	CAG-177	0.95	0.164007	0.835993
RUG721	Arthrobacter_B	0.97	0.124591	0.875409			UBA3789	Anaerofilum_73741	0.9	0.22	0.78			Gabonibacter	Fimenecus	0.95	0.164625	0.835375
Adlercreutzia_404218	RUG721	0.97	0.124634	0.875366			Emergencia	Eubacterium_R	0.9	0.22	0.78			Reyranella	VBCK01	0.95	0.164656	0.835344
Eubacterium_R	QAMH01	0.97	0.124706	0.875294			Adlercreutzia_404199	Romboutsia_B	0.9	0.22	0.78			Mobilitalea	Eubacterium_Q	0.95	0.164664	0.835336
RUG721	Peribacillus_301373	0.97	0.124753	0.875247			CAG-1024	Thermophilibacter	0.9	0.22	0.78			Harryflintia	Scatoplasma	0.95	0.164719	0.835281
Acinetobacter	Eubacterium_R	0.97	0.124761	0.875239			Suipraeoptans	CAG-1427	0.9	0.22	0.78			CAG-1000	Ventrisoma	0.95	0.164731	0.835269
Aureimonas_A_501548	Berryella	0.97	0.124855	0.875145			Flavobacterium	Methanobrevibacter_D_1148	0.9	0.22	0.78			Clostridium_P	Methanosphaera	0.95	0.164809	0.835191
RUG721	Pradoshia	0.97	0.125051	0.874949			UBA4285	Flavobacterium	0.9	0.22	0.78			Lawsonibacter	Blautia_A_141781	0.95	0.164825	0.835175
BICA1-8	Bariatricus	0.97	0.125074	0.874926			Psychrobacillus	Romboutsia_B	0.9	0.22	0.78			Enterousia	Butyribacter	0.95	0.165074	0.834926
RUG721	Suipraeoptans	0.97	0.125091	0.874909			Escherichia_710834	UBA1367	0.9	0.22	0.78			Eisenbergiella	Blautia_A_141781	0.95	0.165236	0.834764
BX12	Duncaniella	0.97	0.125107	0.874893			JC017	Escherichia_710834	0.9	0.22	0.78			CAG-964	Ruminococcus_E	0.95	0.165493	0.834507
FD2005	QAMH01	0.97	0.125126	0.874874			Adlercreutzia_404199	Methanobrevibacter_A	0.9	0.22	0.78			Corynebacterium	Brevundimonas	0.94	0.16639	0.83361
Pradoshia	Scybalousia	0.97	0.125208	0.874792			UBA1254	Spyradosoma	0.9	0.23	0.77			Mobilitalea	CAG-196	0.94	0.166511	0.833489
43-108	UBA1436	0.97	0.125409	0.874591			Stenotrophomonas_A_615274	RUG13038	0.9	0.23	0.77			CAG-196	Prevotella	0.94	0.16698	0.83302
RUG13615	Pradoshia	0.97	0.125473	0.874527			RUG705	RUG12438	0.9	0.23	0.77			CAG-314	PeH17	0.94	0.167212	0.832788
RUG721	Christensenella	0.97	0.125729	0.874271			SFMI01	BICA1-8	0.9	0.23	0.77			UBA1394	WQSK01	0.94	0.167422	0.832578
Bulleidia	Eubacterium_R	0.97	0.125858	0.874142			BX12	Eubacterium_R	0.9	0.23	0.77			Bilifractor	Treponema_F	0.94	0.167605	0.832395
Slackia_A	Frigoribacterium	0.97	0.126079	0.873921			Methanobrevibacter_A	CAG-793	0.9	0.23	0.77			Clostridium_Q_135822	CAG-177	0.94	0.167608	0.832392
Marvinbryantia	Bulleidia	0.97	0.126195	0.873805			Flavobacterium	Eubacterium_T	0.9	0.23	0.77			Massilia	Collinsella	0.94	0.167676	0.832324
Choladousia	Methylobacterium	0.97	0.126307	0.873693			Eubacterium_S	Breznakia	0.9	0.23	0.77			CAG-194	Blautia_A_141781	0.94	0.167951	0.832049
FD2005	Eubacterium_I	0.97	0.12635	0.87365			Peribacillus_301373	Romboutsia_B	0.9	0.23	0.77			Anaerobutyricum	Lawsonibacter	0.94	0.168056	0.831944
Frigoribacterium	Christensenella	0.97	0.126352	0.873648			Mobilisporobacter	Ruminococcus_C_58660	0.9	0.23	0.77			Eubacterium_R	Oscillibacter	0.94	0.168161	0.831839
Hornefia	CAG-273	0.97	0.126623	0.873377			Adlercreutzia_404199	UBA636	0.9	0.23	0.77			Emergencia	Eisenbergiella	0.94	0.168214	0.831786
Hornefia	Suipraeoptans	0.97	0.127008	0.872992			Coprosoma	UBA3789	0.9	0.23	0.77			JC017	FD2005	0.94	0.168327	0.831673
Marvinbryantia	Nanosyncoccus	0.97	0.127055	0.872945			Turicibacter	Methanobrevibacter_A	0.9	0.23	0.77			Enterousia	Scatocola	0.94	0.16834	0.83166
UMGS1994	CAG-1427	0.97	0.127287	0.872713			RUG13615	Flavobacterium	0.9	0.23	0.77			CAG-307	Prevotella	0.94	0.168524	0.831476
Suipraeoptans	Actinomyces	0.97	0.127323	0.872677			Raoultibacter	RUG13038	0.9	0.23	0.77			Harryflintia	Eisenbergiella	0.94	0.168977	0.831023
RUG705	Bariatricus	0.97	0.127367	0.872633			Flavobacterium	QAMH01	0.9	0.23	0.77			Ralstonia	FD2005	0.94	0.169156	0.830844
Olsenella_H_405128	Duncaniella	0.97	0.127662	0.872338										Eubacterium_Q	F0058	0.94	0.169252	0.830748
Eubacterium_I	Copromorpha	0.97	0.127711	0.872289										CAG-307	F0058	0.94	0.169411	0.830589
Pradoshia	Actinomyces	0.97	0.127817	0.872183										Ventrisoma	Faecalimonas	0.94	0.169558	0.830442
Frigoribacterium	Berryella	0.97	0.127822	0.872178										Scatocola	Alistipes_A_871400	0.94	0.169838	0.830162
Pradoshia	FD2005	0.97	0.127828	0.872172										Anaerotignum_189125	UBA7173	0.94	0.169875	0.830125
RUG721	QAMH01	0.97	0.127971	0.872029										CAG-1000	UBA7173	0.94	0.169923	0.830077
UBA3789	Copromorpha	0.97	0.128278	0.871722										Azorhizobium	FD2005	0.94	0.170126	0.829874
Suipraeoptans	Saccharofermentans	0.97	0.128471	0.871529										Enterousia	WQSK01	0.94	0.170173	0.829827
Acinetobacter	Akkermansia	0.97	0.128528	0.871472										Paracoccus	Corynebacterium	0.94	0.170269	0.829731
Scybalousia	CAG-273	0.97	0.128724	0.871276										VBCK01	Sphingomonas_L_486704	0.94	0.170292	0.829708
UBA3789	UBA2730	0.97	0.128744	0.871256										Treponema_D	UBA1394	0.94	0.170459	0.829541
Pradoshia	Christensenella	0.97	0.128795	0.871205										Gabonibacter	Scatoplasma	0.94	0.170737	0.829263
Bulleidia	QAMH01	0.97	0.128965	0.871035										Peptacetobacter	Fusobacterium_B	0.94	0.170769	0.829231
BX12	Frigoribacterium	0.97	0.129089	0.870911										UBA3789	CAG-269	0.94	0.171154	0.828846
BX12	Hornefia	0.97	0.129273	0.870727										CAG-177	Bariatricus	0.94	0.171179	0.828821
Bulleidia	Coprococcus_A_187866	0.97	0.129332	0.870668										CAG-1000	Limiplasma	0.94	0.17127	0.82873
Olsenella_H_405128	Copromorpha	0.97	0.129687	0.870313										UBA1427	Ruminococcus_E	0.94	0.172035	0.827965
QAMH01	Copromorpha	0.97	0.129749	0.870251										Methylobacterium	QKMZ01	0.94	0.172205	0.827795
RUG13615	QAMH01	0.97	0.129763	0.870237										Anaerotignum_189125	Bariatricus	0.94	0.172332	0.827668
CAG-710	Copromorpha	0.97	0.129781	0.870219										Clostridium_Q_135822	Anaerobutyricum	0.94	0.172786	0.827214
RUG521	UBA2730	0.97	0.129803	0.870197										CAG-95	RUG131	0.94	0.172864	0.827136
Thermophilibacter	FD2005	0.97	0.129844	0.870156										CAG-267	UBA1402	0.94	0.172952	0.827048
RUG13615	RUG521	0.97	0.129958	0.870042										Harryflintia	Paludicola	0.94	0.173476	0.826524
Olsenella_H_405128	Pradoshia	0.97	0.130065	0.869935										Adlercreutzia_404257	Brevundimonas	0.94	0.173778	0.826222
Nanosyncoccus	Hornefia	0.97	0.130188	0.869812										Gabonibacter	Traorella	0.94	0.174116	0.825884
UBA3789	UMGS1994	0.97	0.130251	0.869749										Aquabacterium_B_592457	Paracoccus	0.94	0.174357	0.825643
DSXL01	Romboutsia_B	0.97	0.130324	0.869676										CAG-177	CAG-194	0.94	0.174498	0.825502
DSXL01	QAMH01	0.97	0.13039	0.86961										Dysosmobacter	Scatomonas	0.94	0.174562	0.825438
Nanosyncoccus	CAG-273	0.97	0.130508	0.869492										Bacteroides_H	Ruthenibacterium	0.94	0.17492	0.82508
Acinetobacter	Saccharofermentans	0.97	0.130623	0.869377										Emergencia	CAG-194	0.94	0.175044	0.824956
Bulleidia	Suipraeoptans	0.97	0.130781	0.869219										Emergencia	Lawsonibacter	0.94	0.175081	0.824919
DSXL01	CAG-1427	0.97	0.130824	0.869176										Reyranella	Corynebacterium	0.94	0.175132	0.824868
Olsenella_H_405128	Butyrivibrio_A_168226	0.97	0.13083	0.86917										Choladousia	Clostridium_Q_135822	0.94	0.175227	0.824773
Actinomyces	QAMH01	0.97	0.130907	0.869093										Emergencia	UMGS1071	0.94	0.175405	0.824595
Nanosyncoccus	RUG721	0.97	0.130979	0.869021										Traorella	Faecalimonas	0.94	0.17546	0.82454
Adlercreutzia_404218	Suipraeoptans	0.97	0.131152	0.868848										Aquabacterium_B_592457	Collinsella	0.94	0.175804	0.824196
Olsenella_H_405128	Actinomyces	0.97	0.131163	0.868837										Caproiciproducens	CAG-269	0.94	0.175829	0.824171
Ruminococcus_F	COE1	0.97	0.131376	0.868624										Bariatricus	UMGS1071	0.94	0.175857	0.824143
Christensenella	FD2005	0.97	0.131398	0.868602										UBA737	CAG-964	0.94	0.175986	0.824014
Slackia_A	Bulleidia	0.97	0.131731	0.868269										Mobilitalea	Scatocola	0.94	0.17618	0.82382
Coprococcus_A_187866	CAG-273	0.97	0.131761	0.868239										Victivallis	43-108	0.94	0.17648	0.82352
Hornefia	Clostridium_N_143832	0.97	0.131812	0.868188										Clostridium_Q_135822	Bariatricus	0.94	0.176573	0.823427
UBA3789	Eubacterium_R	0.97	0.131819	0.868181										Traorella	UBA7173	0.94	0.176821	0.823179
Saccharofermentans	QAMH01	0.97	0.131871	0.868129										Clostridium_Q_135822	Blautia_A_141781	0.94	0.176878	0.823122
Hornefia	RUG521	0.97	0.132062	0.867938										Rothia	Ralstonia	0.94	0.176886	0.823114
QAMM01	UBA1248	0.97	0.13208	0.86792										Azorhizobium	Corynebacterium	0.94	0.1769	0.8231
UMGS1994	Frigoribacterium	0.97	0.132131	0.867869										CAG-314	RUG13077	0.94	0.177032	0.822968
RUG13038	UBA2730	0.97	0.132178	0.867822										Lawsonibacter	Bariatricus	0.94	0.177981	0.822019
Suipraeoptans	Christensenella	0.97	0.132223	0.867777										Anaerobutyricum	Traorella	0.94	0.178057	0.821943
Adlercreutzia_404218	QAMH01	0.97	0.132276	0.867724										F0058	1XD42-69	0.94	0.178067	0.821933
Adlercreutzia_404218	Pradoshia	0.96	0.132309	0.867691										Faecalibacterium	CAG-269	0.94	0.178118	0.821882
Phascolarctobacterium_A	Phocaeicola_A_858004	0.96	0.132311	0.867689										CAG-1252	UBA737	0.94	0.178367	0.821633
BX12	UBA2730	0.96	0.132464	0.867536										UBA7173	Phocaeicola_A_858004	0.94	0.178589	0.821411
Adlercreutzia_404218	Acinetobacter	0.96	0.132592	0.867408										Clostridium_Q_135822	Harryflintia	0.94	0.178758	0.821242
RUG721	Duncaniella	0.96	0.132751	0.867249										Mobilitalea	Treponema_D	0.94	0.178963	0.821037
Nanosyncoccus	Mogibacterium	0.96	0.132756	0.867244										Mobilitalea	WQSK01	0.94	0.17928	0.82072
RUG705	CAG-273	0.96	0.132791	0.867209										Enterousia	CAG-307	0.94	0.179313	0.820687
Hornefia	CAG-710	0.96	0.132876	0.867124										Treponema_D	Caproicibacterium	0.94	0.179541	0.820459
Hornefia	Pradoshia	0.96	0.132986	0.867014										Rubellimicrobium	Ralstonia	0.94	0.17984	0.82016
UMGS1994	Bulleidia	0.96	0.133066	0.866934										Bradyrhizobium	Novosphingobium_485350	0.94	0.179968	0.820032
RUG705	Eubacterium_R	0.96	0.133091	0.866909										Anaerobutyricum	Ventrisoma	0.94	0.180004	0.819996
Aureimonas_A_501548	RUG521	0.96	0.133348	0.866652										Ventrisoma	UBA7173	0.94	0.180135	0.819865
Butyrivibrio_A_168226	Eubacterium_I	0.96	0.133372	0.866628										Choladousia	Traorella	0.94	0.180156	0.819844
Acinetobacter	Christensenella	0.96	0.133679	0.866321										Paracoccus	BICA1-8	0.94	0.180181	0.819819
Actinomyces	Copromorpha	0.96	0.133697	0.866303										RF16	F0058	0.94	0.180193	0.819807
Frigoribacterium	Eubacterium_R	0.96	0.133882	0.866118										Emergencia	Gabonibacter	0.93	0.180551	0.819449
Coprococcus_A_187866	Eubacterium_I	0.96	0.133993	0.866007										Anaerotignum_189125	Paludicola	0.93	0.180578	0.819422
UBA3789	Bulleidia	0.96	0.134238	0.865762										Coprosoma	CAG-964	0.93	0.180918	0.819082
Aureimonas_A_501548	Bulleidia	0.96	0.134372	0.865628										Clostridium_Q_135822	CAG-1000	0.93	0.180943	0.819057
Parafannyhessea	Adlercreutzia_404199	0.96	0.134423	0.865577										UBA1930	Paracoccus	0.93	0.181139	0.818861
Adlercreutzia_404218	Copromorpha	0.96	0.134458	0.865542										Treponema_D	Enterousia	0.93	0.18142	0.81858
UBA3789	Duncaniella	0.96	0.134484	0.865516										Mobilitalea	UBA1402	0.93	0.181806	0.818194
Aureimonas_A_501548	Pradoshia	0.96	0.134508	0.865492										CAG-194	Bariatricus	0.93	0.182197	0.817803
RUG705	CAG-710	0.96	0.134986	0.865014										Anaerotignum_189125	Blautia_A_141781	0.93	0.182211	0.817789
UBA3789	Actinomyces	0.96	0.13514	0.86486										Phocaeicola_A_858004	Scatomonas	0.93	0.182564	0.817436
Bulleidia	RUG521	0.96	0.135204	0.864796										Roseomonas_A_507160	UMGS2069	0.93	0.183053	0.816947
Frisingicoccus	Onthenecus	0.96	0.135447	0.864553										CAG-196	Eubacterium_Q	0.93	0.183138	0.816862
Olsenella_H_405128	Akkermansia	0.96	0.135702	0.864298										Emergencia	CAG-1000	0.93	0.183226	0.816774
CAG-1427	RUG521	0.96	0.135723	0.864277										Anaerobutyricum	CAG-1000	0.93	0.183486	0.816514
Nanosyncoccus	UMGS1994	0.96	0.135851	0.864149										Caulobacter_487784	FD2005	0.93	0.183495	0.816505
DSXL01	Berryella	0.96	0.135964	0.864036										Rubellimicrobium	Brevundimonas	0.93	0.183709	0.816291
DSXL01	Suipraeoptans	0.96	0.13615	0.86385										Clostridium_T	Bacillus_AD	0.93	0.183791	0.816209
Suipraeoptans	CAG-1427	0.96	0.136207	0.863793										Muricomes_149725	Thermophilibacter	0.93	0.183915	0.816085
UBA3789	Akkermansia	0.96	0.13622	0.86378										UBA1394	Eubacterium_Q	0.93	0.184141	0.815859
Scybalousia	Copromorpha	0.96	0.136326	0.863674										Gabonibacter	Ventrisoma	0.93	0.184153	0.815847
Actinomyces	FD2005	0.96	0.136355	0.863645										Coprosoma	UBA737	0.93	0.18416	0.81584
Berryella	UBA2730	0.96	0.13637	0.86363										Eubacterium_S	QAKW01	0.93	0.184173	0.815827
UBA3789	Scybalousia	0.96	0.136507	0.863493										Enterousia	Prevotella	0.93	0.184317	0.815683
Aureimonas_A_501548	Romboutsia_B	0.96	0.136638	0.863362										Enterousia	Eubacterium_Q	0.93	0.184507	0.815493
RUG721	RUG705	0.96	0.136656	0.863344										Enterousia	UBA1402	0.93	0.18462	0.81538
Pradoshia	CAG-273	0.96	0.136983	0.863017										Reyranella	FD2005	0.93	0.184696	0.815304
Mogibacterium	Pradoshia	0.96	0.137141	0.862859										CAG-196	Caproicibacterium	0.93	0.185359	0.814641
Butyrivibrio_A_168226	Pradoshia	0.96	0.137227	0.862773										Haliangium_463188	Collinsella	0.93	0.185623	0.814377
Choladousia	Romboutsia_B	0.96	0.137353	0.862647										UBA1930	Collinsella	0.93	0.185741	0.814259
Faecisoma	RUG12438	0.96	0.137437	0.862563										Limiplasma	Phocaeicola_A_858004	0.93	0.185896	0.814104
Bulleidia	Duncaniella	0.96	0.1375	0.8625										Bariatricus	Eisenbergiella	0.93	0.186175	0.813825
UBA4285	Anaerofustis	0.96	0.137614	0.862386										UBA1427	UBA1436	0.93	0.186274	0.813726
Slackia_A	Marvinbryantia	0.96	0.137698	0.862302										Fusobacterium_A	Peptacetobacter	0.93	0.186379	0.813621
Suipraeoptans	RUG705	0.96	0.137709	0.862291										RF16	Anaerosacchariphilus	0.93	0.186389	0.813611
RUG721	Actinomyces	0.96	0.137796	0.862204										Gabonibacter	Phocaeicola_A_858004	0.93	0.186495	0.813505
Slackia_A	Berryella	0.96	0.137929	0.862071										UBA3789	Breznakia	0.93	0.186537	0.813463
Shuttleworthia	FD2005	0.96	0.13807	0.86193										Paracoccus	Williamsia_A	0.93	0.186565	0.813435
Bulleidia	CAG-273	0.96	0.138073	0.861927										Rubellimicrobium	Corynebacterium	0.93	0.186684	0.813316
Marvinbryantia	RUG705	0.96	0.1381	0.8619										Bariatricus	Scatoplasma	0.93	0.186778	0.813222
UBA3789	Berryella	0.96	0.138708	0.861292										UBA7173	UMGS1071	0.93	0.186868	0.813132
Mogibacterium	Coprococcus_A_187866	0.96	0.138735	0.861265										CAG-605	Paludicola	0.93	0.186872	0.813128
Aureimonas_A_501548	Copromorpha	0.96	0.138894	0.861106										Choladousia	Faecimonas	0.93	0.187103	0.812897
Saccharofermentans	FD2005	0.96	0.13894	0.86106										JC017	Novosphingobium_485350	0.93	0.187172	0.812828
Slackia_A	Akkermansia	0.96	0.138961	0.861039										CAG-1000	Intestinimonas	0.93	0.187234	0.812766
Slackia_A	Eubacterium_R	0.96	0.138962	0.861038										Paludicola	Faecimonas	0.93	0.18729	0.81271
Pradoshia	CAG-710	0.96	0.139039	0.860961										Taonella	Sphingomonas_L_486704	0.93	0.18786	0.81214
UBA3789	Clostridium_N_143832	0.96	0.139369	0.860631										Pradoshia	BICA1-8	0.93	0.187896	0.812104
Olsenella_H_405128	Saccharofermentans	0.96	0.139493	0.860507										CAG-873	UBA7173	0.93	0.187939	0.812061
Hornefia	RUG705	0.96	0.139513	0.860487										Adlercreutzia_404257	Ralstonia	0.93	0.188363	0.811637
Nanosyncoccus	Bulleidia	0.96	0.139619	0.860381										Choladousia	CAG-177	0.93	0.18845	0.81155
Marseille-P2935	Faecousia	0.96	0.139688	0.860312										Eubacterium_R	Neobacillus	0.93	0.188487	0.811513
Aureimonas_A_501548	QAMH01	0.96	0.139765	0.860235										Zag111	Scatocola	0.93	0.188651	0.811349
Ruminococcus_C_59129	COE1	0.96	0.140192	0.859808										Faecalibacterium	Pelethenecus	0.93	0.188869	0.811131
UMGS1994	RUG705	0.96	0.140195	0.859805										UBA737	UBA1436	0.93	0.189117	0.810883
Bariatricus	Eubacterium_T	0.96	0.140706	0.859294										Prevotella	43-108	0.93	0.189296	0.810704
Duncaniella	Saccharofermentans	0.96	0.14089	0.85911										CAG-1000	Faecimonas	0.93	0.189802	0.810198
RUG721	UBA2730	0.96	0.140892	0.859108										RF16	Prevotella	0.93	0.189923	0.810077
RUG705	RUG12438	0.96	0.141273	0.858727										Coprosoma	WG-1	0.93	0.190017	0.809983
Choladousia	Frigoribacterium	0.96	0.141291	0.858709										Aquabacterium_A	Paracoccus	0.93	0.190094	0.809906
Frigoribacterium	Eubacterium_I	0.96	0.141327	0.858673										PeH17	UBA1413	0.93	0.190564	0.809436
RUG13615	Thermophilibacter	0.96	0.141379	0.858621										CAG-177	CAG-1000	0.93	0.191242	0.808758
Anaerobutyricum	Hornefia	0.96	0.141419	0.858581										CAG-1252	Ruminococcus_E	0.93	0.191542	0.808458
Bulleidia	Adlercreutzia_404218	0.96	0.141756	0.858244										Scatoplasma	Faecalimonas	0.93	0.192026	0.807974
Frigoribacterium	Peribacillus_301373	0.96	0.141955	0.858045										Scatoplasma	Blautia_A_141781	0.93	0.192196	0.807804
Frigoribacterium	Arthrobacter_B	0.96	0.142055	0.857945										Traorella	UMGS1071	0.93	0.192347	0.807653
BX12	Acinetobacter	0.96	0.142123	0.857877										Cryptobacteroides	UBA7173	0.93	0.192473	0.807527
RUG13615	BX12	0.96	0.142258	0.857742										Eisenbergiella	Faecalimonas	0.93	0.192897	0.807103
Bulleidia	Frigoribacterium	0.96	0.142407	0.857593										Choladousia	Eisenbergiella	0.93	0.19293	0.80707
Hornefia	Peribacillus_301373	0.96	0.142572	0.857428										Lawsonibacter	Faecalimonas	0.93	0.193404	0.806596
Hornefia	Arthrobacter_B	0.96	0.142654	0.857346										Methylobacterium	Rubellimicrobium	0.93	0.193411	0.806589
RUG721	Thermophilibacter	0.96	0.142776	0.857224										Harryflintia	Lawsonibacter	0.93	0.193451	0.806549
Duncaniella	Copromorpha	0.96	0.142867	0.857133										RUG13038	UMGS2069	0.93	0.193493	0.806507
Bulleidia	Christensenella	0.96	0.143094	0.856906										Anaerobutyricum	Blautia_A_141781	0.92	0.193716	0.806284
RUG13615	RUG705	0.96	0.143131	0.856869										UBA1394	UBA71	0.92	0.193809	0.806191
Olsenella_H_405128	FD2005	0.96	0.143406	0.856594										UBA3830	Akkermansia	0.92	0.193842	0.806158
Adlercreutzia_404218	FD2005	0.96	0.143415	0.856585										CAG-353	C-53	0.92	0.193982	0.806018
RUG13615	FD2005	0.96	0.143629	0.856371										CAG-307	CAG-267	0.92	0.194202	0.805798
RUG721	Hornefia	0.96	0.143642	0.856358										Prevotella	Velocimicrobium	0.92	0.194322	0.805678
Emergencia	BICA1-8	0.96	0.143856	0.856144										2024-02-14	CAG-41	0.92	0.194465	0.805535
Berryella	RUG705	0.96	0.144119	0.855881										WQSK01	Scatocola	0.92	0.194739	0.805261
Bulleidia	FD2005	0.96	0.144414	0.855586										CAG-194	Intestinimonas	0.92	0.1948	0.8052
Saccharofermentans	UBA2730	0.96	0.144417	0.855583										UBA7173	Scatoplasma	0.92	0.1949	0.8051
Massilioclostridium	Clostridioides_A	0.96	0.144434	0.855566										Haliangium_463188	Rothia	0.92	0.19494	0.80506
Anaerobutyricum	Coprococcus_A_187866	0.96	0.144697	0.855303										UBA7173	Intestinimonas	0.92	0.19533	0.80467
Frigoribacterium	Actinomyces	0.96	0.145059	0.854941										UBA7173	Blautia_A_141781	0.92	0.195339	0.804661
Bulleidia	Pradoshia	0.96	0.14507	0.85493										RF16	43-108	0.92	0.195538	0.804462
Slackia_A	UMGS1994	0.96	0.14514	0.85486										CAG-603	UBA2253	0.92	0.196168	0.803832
Bulleidia	Hornefia	0.96	0.145143	0.854857										WQSK01	Caproicibacterium	0.92	0.1969	0.8031
Onthomonas	Solibacillus	0.96	0.145297	0.854703										CAG-196	UBA1402	0.92	0.197113	0.802887
Nanosyncoccus	Suipraeoptans	0.96	0.145362	0.854638										VBCK01	Corynebacterium	0.92	0.197267	0.802733
Emergencia	Eubacterium_T	0.96	0.145462	0.854538										Intestinimonas	Faecalimonas	0.92	0.197447	0.802553
Frigoribacterium	Thermophilibacter	0.96	0.145592	0.854408										Pelagibacter_A_533952	Copromorpha	0.92	0.197499	0.802501
Clostridium_N_143832	RUG12438	0.96	0.145686	0.854314										Rothia	Brevundimonas	0.92	0.197947	0.802053
Bulleidia	Akkermansia	0.96	0.145694	0.854306										Choladousia	CAG-1000	0.92	0.198	0.802
Nanosyncoccus	Bariatricus	0.96	0.145742	0.854258										Anaerobutyricum	UBA7173	0.92	0.198139	0.801861
CAG-273	Bariatricus	0.96	0.145772	0.854228										UBA1394	1XD42-69	0.92	0.198219	0.801781
DSXL01	Nanosyncoccus	0.96	0.145809	0.854191										CAG-196	F0058	0.92	0.198494	0.801506
CAG-273	Eubacterium_R	0.96	0.145842	0.854158										CAG-873	Limiplasma	0.92	0.198659	0.801341
Olsenella_H_405128	Adlercreutzia_404218	0.96	0.145859	0.854141										CAG-177	Anaerobutyricum	0.92	0.198739	0.801261
Adlercreutzia_404218	Frigoribacterium	0.96	0.145934	0.854066										UBA1930	Rubellimicrobium	0.92	0.198923	0.801077
UBA3789	Peribacillus_301373	0.96	0.146006	0.853994										Treponema_D	Bacteroides_H	0.92	0.198953	0.801047
Hornefia	Coprococcus_A_187866	0.96	0.146076	0.853924										Limiplasma	UBA7173	0.92	0.199015	0.800985
Aureimonas_A_501548	CAG-793	0.96	0.146088	0.853912										Enterousia	F0058	0.92	0.199016	0.800984
Clostridium_N_143832	Eubacterium_R	0.96	0.146143	0.853857										PeH17	Terrisporobacter	0.92	0.199115	0.800885
Massilioclostridium	Terrisporobacter	0.96	0.146168	0.853832										Anaerotignum_189125	UMGS1071	0.92	0.199129	0.800871
Slackia_A	Eubacterium_I	0.96	0.146246	0.853754										Coprosoma	CAG-1252	0.92	0.199203	0.800797
Turicibacter	CAG-793	0.96	0.146472	0.853528										Scatocola	1XD42-69	0.92	0.199407	0.800593
RUG12438	Eubacterium_T	0.96	0.14669	0.85331										CAG-1000	Lawsonibacter	0.92	0.19947	0.80053
CACXMZ01	Anaerobutyricum	0.96	0.146701	0.853299										QALR01	PeH17	0.92	0.199566	0.800434
UBA3789	Arthrobacter_B	0.96	0.147108	0.852892										Gabonibacter	CAG-605	0.92	0.199712	0.800288
Aureimonas_A_501548	Devosia_A_502124	0.96	0.147351	0.852649										Holdemania	RUG705	0.92	0.199751	0.800249
RUG13615	UMGS1994	0.96	0.147358	0.852642										Clostridium_T	Eubacterium_R	0.92	0.19997	0.80003
Eubacterium_I	QAMH01	0.96	0.147385	0.852615										Mobilitalea	43-108	0.92	0.200032	0.799968
Faecisoma	Bariatricus	0.96	0.14775	0.85225										Taonella	Collinsella	0.92	0.200265	0.799735
Mogibacterium	Thermophilibacter	0.96	0.147991	0.852009										Gabonibacter	CAG-873	0.92	0.20029	0.79971
Nanosyncoccus	RUG521	0.96	0.148399	0.851601										Lawsonibacter	UMGS1071	0.92	0.20038	0.79962
Bariatricus	CAG-1427	0.96	0.148533	0.851467										UBA6448	Aphodomorpha	0.92	0.20057	0.79943
RUG705	FD2005	0.96	0.148671	0.851329										Adlercreutzia_404257	JC017	0.92	0.200734	0.799266
RUG705	RUG521	0.96	0.148822	0.851178										Choladousia	Ventrisoma	0.92	0.200771	0.799229
Aureimonas_A_501548	FD2005	0.96	0.148914	0.851086										QAKW01	Methanobrevibacter_A	0.92	0.200854	0.799146
Hornefia	Akkermansia	0.96	0.149137	0.850863										Anaerobutyricum	UMGS1071	0.92	0.201213	0.798787
Coprococcus_A_187866	Copromorpha	0.96	0.149799	0.850201										UMGS1071	Eisenbergiella	0.92	0.201261	0.798739
Butyrivibrio_A_168226	Thermophilibacter	0.96	0.149877	0.850123										Bacteroides_H	Prevotella	0.92	0.201308	0.798692
CACXMZ01	Hornefia	0.95	0.15004	0.84996										UBA1930	Sphingomonas_L_486704	0.92	0.201395	0.798605
Eubacterium_R	Eubacterium_I	0.95	0.150084	0.849916										Mobilitalea	CAG-307	0.92	0.201563	0.798437
Bulleidia	Thermophilibacter	0.95	0.150091	0.849909										CAG-267	F0058	0.92	0.20201	0.79799
BX12	Scybalousia	0.95	0.150095	0.849905										UBA6448	UBA7862	0.92	0.202013	0.797987
Hornefia	Mogibacterium	0.95	0.150188	0.849812										CAG-196	CAG-307	0.92	0.20214	0.79786
BX12	QAMH01	0.95	0.150323	0.849677										Anaerobutyricum	Faecimonas	0.92	0.202493	0.797507
Aureimonas_A_501548	Suipraeoptans	0.95	0.15033	0.84967										Bradyrhizobium	FD2005	0.92	0.202638	0.797362
Bulleidia	BX12	0.95	0.150531	0.849469										Enterousia	Caproicibacterium	0.92	0.20276	0.79724
Bulleidia	Berryella	0.95	0.15075	0.84925										UBA1413	UBA1259	0.92	0.203015	0.796985
UBA3789	Christensenella	0.95	0.150911	0.849089										CAG-177	UBA7173	0.92	0.203099	0.796901
Coprococcus_A_187866	CAG-710	0.95	0.150942	0.849058										WQSK01	Bacteroides_H	0.92	0.203137	0.796863
UBA2730	QAMH01	0.95	0.150987	0.849013										SFMI01	Fimiplasma	0.92	0.203285	0.796715
UBA3789	RUG521	0.95	0.151004	0.848996										Caproicibacterium	1XD42-69	0.92	0.20339	0.79661
UBA3789	Butyrivibrio_A_168226	0.95	0.151011	0.848989										Mobilitalea	1XD42-69	0.92	0.203776	0.796224
Olsenella_H_405128	Christensenella	0.95	0.151076	0.848924										G11	Gallalistipes	0.92	0.203896	0.796104
Olsenella_H_405128	UBA1066	0.95	0.15123	0.84877										CAG-605	Harryflintia	0.92	0.203989	0.796011
Acinetobacter	FD2005	0.95	0.15132	0.84868										Alistipes_A_871400	Paramuribaculum	0.92	0.204693	0.795307
Bulleidia	UBA2730	0.95	0.151613	0.848387										JC017	Brachybacterium	0.92	0.204908	0.795092
Bulleidia	Arthrobacter_B	0.95	0.151628	0.848372										Alistipes_A_871400	UBA1402	0.92	0.204983	0.795017
Coprosoma	RUG13038	0.95	0.151636	0.848364										Mobilitalea	UBA1067	0.92	0.205154	0.794846
RUG13615	Saccharofermentans	0.95	0.151742	0.848258										Treponema_D	Scatocola	0.92	0.205208	0.794792
RUG13615	Mogibacterium	0.95	0.15198	0.84802										Ruminiclostridium_E	Fimiplasma	0.92	0.205398	0.794602
Hornefia	Scybalousia	0.95	0.152054	0.847946										CAG-307	Alistipes_A_871400	0.92	0.205482	0.794518
Duncaniella	FD2005	0.95	0.152078	0.847922										UBA1930	Corynebacterium	0.92	0.205804	0.794196
DSXL01	CAG-793	0.95	0.152089	0.847911										Scatocola	Paramuribaculum	0.92	0.205949	0.794051
Acinetobacter	UBA2730	0.95	0.152236	0.847764										Scatocola	Eubacterium_Q	0.91	0.206527	0.793473
Bulleidia	Peribacillus_301373	0.95	0.152315	0.847685										UBA1067	Scatocola	0.91	0.206563	0.793437
Adlercreutzia_404218	CAG-1427	0.95	0.152407	0.847593										Anaerotignum_189125	Faecimonas	0.91	0.206606	0.793394
Suipraeoptans	Thermophilibacter	0.95	0.152667	0.847333										Taonella	Corynebacterium	0.91	0.20661	0.79339
Nanosyncoccus	Berryella	0.95	0.152669	0.847331										UBA2658	Ruthenibacterium	0.91	0.206818	0.793182
Frigoribacterium	QAMH01	0.95	0.152931	0.847069										QAMM01	UBA1361	0.91	0.207089	0.792911
Bulleidia	Clostridium_N_143832	0.95	0.153028	0.846972										SFMI01	RUG12438	0.91	0.207359	0.792641
Suipraeoptans	UBA2730	0.95	0.153068	0.846932										Paracoccus	Taonella	0.91	0.207361	0.792639
Slackia_A	CAG-273	0.95	0.153115	0.846885										Anaerobutyricum	Paludicola	0.91	0.20739	0.79261
Marvinbryantia	Clostridium_N_143832	0.95	0.153349	0.846651										Eubacterium_G	UBA1709	0.91	0.207419	0.792581
Slackia_A	RUG13615	0.95	0.153412	0.846588										UBA1394	Fimiplasma	0.91	0.207525	0.792475
Frigoribacterium	Mogibacterium	0.95	0.15357	0.84643										CAG-194	Traorella	0.91	0.207625	0.792375
CAG-710	RUG12438	0.95	0.153749	0.846251										Victivallis	Caproicibacterium	0.91	0.207685	0.792315
CAG-1000	Soleaferrea	0.95	0.153895	0.846105										CAG-510	UBA1259	0.91	0.20784	0.79216
RUG721	Clostridium_N_143832	0.95	0.153928	0.846072										Paracoccus	Brachybacterium	0.91	0.207925	0.792075
Thermophilibacter	Copromorpha	0.95	0.15406	0.84594										Ruminiclostridium_E	UBA1394	0.91	0.208262	0.791738
Nanosyncoccus	Akkermansia	0.95	0.15412	0.84588										Emergencia	Cryptobacteroides	0.91	0.208603	0.791397
Marvinbryantia	Eubacterium_I	0.95	0.154194	0.845806										Mogibacterium	Methanobrevibacter_D_1148	0.91	0.208996	0.791004
Mogibacterium	Suipraeoptans	0.95	0.154283	0.845717										UMGS1994	Scatomonas	0.91	0.209106	0.790894
RUG721	Saccharofermentans	0.95	0.154577	0.845423										CAG-196	Scatocola	0.91	0.209147	0.790853
Frigoribacterium	RUG521	0.95	0.154605	0.845395										Sphingomonas_L_486704	Brevundimonas	0.91	0.209331	0.790669
RUG721	CAG-273	0.95	0.154682	0.845318										Adlercreutzia_404257	Azorhizobium	0.91	0.209354	0.790646
Olsenella_H_405128	RUG705	0.95	0.154741	0.845259										UBA737	WG-1	0.91	0.209366	0.790634
DSXL01	FD2005	0.95	0.154766	0.845234										Gabonibacter	Eisenbergiella	0.91	0.209404	0.790596
Berryella	Thermophilibacter	0.95	0.154793	0.845207										Sphingomonas_L_486704	Williamsia_A	0.91	0.209679	0.790321
Slackia_A	Bariatricus	0.95	0.154809	0.845191										Ructibacterium	UBA71	0.91	0.209993	0.790007
Thermophilibacter	Shuttleworthia	0.95	0.154874	0.845126										Aminipila	Ruminococcus_C_58660	0.91	0.21011	0.78989
CAG-1427	Christensenella	0.95	0.155019	0.844981										DSXL01	Neobittarella	0.91	0.210113	0.789887
Devosia_A_502124	Methanobrevibacter_A	0.95	0.155244	0.844756										Muricomes_149725	RUG131	0.91	0.210457	0.789543
Slackia_A	Hornefia	0.95	0.155397	0.844603										BICA1-8	Rothia	0.91	0.210496	0.789504
Akkermansia	Eubacterium_I	0.95	0.155427	0.844573										Acinetobacter	Staphylococcus	0.91	0.210511	0.789489
Choladousia	Aureimonas_A_501548	0.95	0.155602	0.844398										Anaerosacchariphilus	UBA7862	0.91	0.210536	0.789464
Peribacillus_301373	CAG-1427	0.95	0.155752	0.844248										CAG-196	Butyribacter	0.91	0.210709	0.789291
RUG13615	Acinetobacter	0.95	0.155761	0.844239										Scatomonas	Paludicola	0.91	0.210829	0.789171
RUG705	Akkermansia	0.95	0.155796	0.844204										Haliangium_463188	Corynebacterium	0.91	0.210832	0.789168
Akkermansia	CAG-1427	0.95	0.155858	0.844142										CAG-196	UBA644	0.91	0.210944	0.789056
Pradoshia	Duncaniella	0.95	0.156039	0.843961										UBA71	C-53	0.91	0.211156	0.788844
RUG721	Scybalousia	0.95	0.15623	0.84377										2024-02-14	Onthenecus	0.91	0.211222	0.788778
CAG-273	CAG-269	0.95	0.156263	0.843737										UBA7862	Angelakisella	0.91	0.211421	0.788579
Arthrobacter_B	CAG-1427	0.95	0.156278	0.843722										Clostridium_Q_135822	Faecalimonas	0.91	0.211453	0.788547
Devosia_A_502124	CAG-793	0.95	0.156384	0.843616										Bilifractor	RUG131	0.91	0.211469	0.788531
Slackia_A	CAG-710	0.95	0.156464	0.843536										Rothia	Massilia	0.91	0.21147	0.78853
Choladousia	CAG-793	0.95	0.156692	0.843308										Anaerobutyricum	Eisenbergiella	0.91	0.211831	0.788169
Marvinbryantia	RUG13615	0.95	0.156783	0.843217										Bilifractor	Hungatella_A_128155	0.91	0.211869	0.788131
Mogibacterium	Eubacterium_R	0.95	0.156849	0.843151										Choladousia	Emergencia	0.91	0.211978	0.788022
Suipraeoptans	CAG-273	0.95	0.156954	0.843046										Mogibacterium	Thermophilibacter	0.91	0.212224	0.787776
Bulleidia	CAG-710	0.95	0.157042	0.842958										Adlercreutzia_404257	Caulobacter_487784	0.91	0.212427	0.787573
DSXL01	Olsenella_H_405128	0.95	0.157062	0.842938										UBA3402	UBA1413	0.91	0.212617	0.787383
Nanosyncoccus	RUG12438	0.95	0.157174	0.842826										Scatoplasma	UBA3207	0.91	0.212658	0.787342
Slackia_A	DSXL01	0.95	0.157501	0.842499										Anaerofilum_73741	UBA1709	0.91	0.212919	0.787081
Butyrivibrio_A_168226	Hornefia	0.95	0.157835	0.842165										Massilioclostridium	Solibacillus	0.91	0.213035	0.786965
Bulleidia	RUG705	0.95	0.157873	0.842127										VBCK01	Collinsella	0.91	0.213242	0.786758
Choladousia	Christensenella	0.95	0.157972	0.842028										Fusobacterium_A	Escherichia_710834	0.91	0.213436	0.786564
Romboutsia_B	Christensenella	0.95	0.158114	0.841886										Eubacterium_Q	Caproicibacterium	0.91	0.213471	0.786529
DSXL01	Eubacterium_I	0.95	0.158158	0.841842										43-108	F0058	0.91	0.214093	0.785907
Bulleidia	Actinomyces	0.95	0.158346	0.841654										Phascolarctobacterium_A	Paramuribaculum	0.91	0.214105	0.785895
CAG-1427	FD2005	0.95	0.158438	0.841562										Faecalibacterium	UBA7173	0.91	0.214318	0.785682
Hornefia	FD2005	0.95	0.158501	0.841499										Rubellimicrobium	Caulobacter_487784	0.91	0.21441	0.78559
CAG-1427	Actinomyces	0.95	0.158574	0.841426										Ruminiclostridium_E	C-53	0.91	0.214439	0.785561
Duncaniella	CAG-1427	0.95	0.158708	0.841292										Muricomes_149725	Methanosphaera	0.91	0.214502	0.785498
Limenecus	Zag111	0.95	0.158777	0.841223										Scatocola	Caproicibacterium	0.91	0.214508	0.785492
DSXL01	Hornefia	0.95	0.158942	0.841058										Muricomes_149725	Mogibacterium	0.91	0.214571	0.785429
CAG-273	Eubacterium_I	0.95	0.158947	0.841053										Ruthenibacterium	1XD42-69	0.91	0.214574	0.785426
CAG-1427	Eubacterium_I	0.95	0.158968	0.841032										CAG-1000	Phocaeicola_A_858004	0.91	0.214714	0.785286
Mogibacterium	FD2005	0.95	0.158979	0.841021										CAG-95	CAG-1024	0.91	0.214831	0.785169
RUG13038	Duncaniella	0.95	0.159005	0.840995										Aphodomorpha	UBA1361	0.91	0.214877	0.785123
Olsenella_H_405128	CAG-1427	0.95	0.15904	0.84096										Ructibacterium	Fimiplasma	0.91	0.215049	0.784951
Slackia_A	Suipraeoptans	0.95	0.159073	0.840927										CAG-873	CAG-632	0.91	0.21524	0.78476
UBA3789	Suipraeoptans	0.95	0.159202	0.840798										Bulleidia	WRAY01	0.91	0.215355	0.784645
Frigoribacterium	Suipraeoptans	0.95	0.159451	0.840549										Faecalibacterium	Caproiciproducens	0.91	0.215838	0.784162
Adlercreutzia_404218	RUG13038	0.95	0.159533	0.840467										UBA7173	Eisenbergiella	0.91	0.215947	0.784053
Berryella	CAG-1427	0.95	0.159609	0.840391										Roseomonas_A_507160	Aphodousia	0.91	0.21599	0.78401
UMGS1994	Clostridium_N_143832	0.95	0.159818	0.840182										Anaerotignum_189125	Faecalimonas	0.91	0.216163	0.783837
RUG13615	Eubacterium_R	0.95	0.15991	0.84009										Eubacterium_N	Pygmaiobacter	0.91	0.216521	0.783479
DSXL01	Clostridium_N_143832	0.95	0.159944	0.840056										Aphodousia	UMGS2069	0.91	0.21678	0.78322
Suipraeoptans	Eubacterium_I	0.95	0.160107	0.839893										Treponema_D	UBA71	0.91	0.216942	0.783058
Butyrivibrio_A_168226	CAG-1427	0.95	0.160254	0.839746										SFMI01	Pygmaiobacter	0.91	0.217381	0.782619
UMGS1994	Eubacterium_I	0.95	0.16028	0.83972										Cryptobacteroides	CAG-269	0.91	0.217486	0.782514
Aureimonas_A_501548	CAG-1427	0.95	0.160287	0.839713										Rubellimicrobium	Sphingomonas_L_486704	0.91	0.217925	0.782075
Kineothrix	Streptococcus	0.95	0.160401	0.839599										Zag111	F0058	0.9	0.21797	0.78203
Bulleidia	Scybalousia	0.95	0.160463	0.839537										UBA1402	Caproicibacterium	0.9	0.218021	0.781979
Nanosyncoccus	Frigoribacterium	0.95	0.160736	0.839264										Harryflintia	Phocaeicola_A_858004	0.9	0.218195	0.781805
Nanosyncoccus	Actinomyces	0.95	0.16087	0.83913										RUG762	Gallalistipes	0.9	0.218205	0.781795
Mogibacterium	CAG-269	0.95	0.161222	0.838778										Hungatella_A_128155	RUG131	0.9	0.218249	0.781751
RUG410	CAG-710	0.95	0.161557	0.838443										Muricomes_149725	CAG-95	0.9	0.218661	0.781339
Olsenella_H_405128	Nanosyncoccus	0.95	0.161785	0.838215										Bulleidia	RUG131	0.9	0.218672	0.781328
Choladousia	DSXL01	0.95	0.161865	0.838135										Clostridium_P	Longicatena	0.9	0.218895	0.781105
Marvinbryantia	CAG-273	0.95	0.161936	0.838064										Coprosoma	RUG762	0.9	0.219092	0.780908
RUG410	CAG-273	0.95	0.16201	0.83799										UBA11490	Oscillibacter	0.9	0.219189	0.780811
Eubacterium_R	CAG-710	0.95	0.162089	0.837911										CAG-196	43-108	0.9	0.219191	0.780809
Pradoshia	QAMH01	0.95	0.162122	0.837878										CAG-873	Scatomonas	0.9	0.219295	0.780705
Adlercreutzia_404218	Hornefia	0.95	0.162201	0.837799										Gabonibacter	Intestinimonas	0.9	0.219354	0.780646
Acinetobacter	Copromorpha	0.95	0.162283	0.837717										Emergencia	Paludicola	0.9	0.219666	0.780334
BX12	CAG-273	0.95	0.162312	0.837688										WQSK01	UBA71	0.9	0.219734	0.780266
CAG-273	RUG521	0.95	0.162369	0.837631										Stercorousia	Eubacterium_I	0.9	0.220132	0.779868
Aureimonas_A_501548	Acinetobacter	0.95	0.162371	0.837629										Anaerobutyricum	Scatoplasma	0.9	0.220419	0.779581
RUG705	CAG-269	0.95	0.162413	0.837587										WRAI01	Acinetobacter	-0.91	0.976488	0.0235119
UBA3789	Saccharofermentans	0.95	0.162606	0.837394										Pradoshia	UBA2813	-0.91	0.976825	0.0231755
RUG13615	CAG-1427	0.95	0.16262	0.83738										Mobilisporobacter	Paralachnospira	-0.92	0.978636	0.0213639
DSXL01	Acinetobacter	0.95	0.162706	0.837294										QALR01	Clostridium_N_143832	-0.94	0.985373	0.0146269
DSXL01	Mogibacterium	0.95	0.162764	0.837236										WRAP01	Marseille-P2935	-0.95	0.986219	0.0137806
UBA3789	Frigoribacterium	0.95	0.162858	0.837142
Nanosyncoccus	Adlercreutzia_404218	0.95	0.162948	0.837052
RUG721	Coprococcus_A_187866	0.95	0.162985	0.837015
Nanosyncoccus	FD2005	0.95	0.163038	0.836962
RUG521	Eubacterium_I	0.95	0.163142	0.836858
Coprococcus_A_187866	CAG-1427	0.95	0.163193	0.836807
RUG13615	RUG721	0.95	0.163201	0.836799
Pradoshia	UBA2730	0.95	0.163327	0.836673
UBA2730	Copromorpha	0.95	0.163373	0.836627
Devosia_A_502124	UBA2730	0.95	0.163411	0.836589
Marvinbryantia	Mogibacterium	0.95	0.163467	0.836533
CAG-964	CAG-914	0.95	0.163511	0.836489
Hornefia	Christensenella	0.95	0.163688	0.836312
Nanosyncoccus	Peribacillus_301373	0.95	0.163716	0.836284
Olsenella_H_405128	Hornefia	0.95	0.163909	0.836091
Slackia_A	Butyrivibrio_A_168226	0.95	0.163978	0.836022
Choladousia	Saccharofermentans	0.95	0.16404	0.83596
Mogibacterium	Bariatricus	0.95	0.164228	0.835772
RUG13615	Paraeggerthella	0.95	0.164267	0.835733
BX12	Mogibacterium	0.95	0.16428	0.83572
Slackia_A	RUG521	0.95	0.164406	0.835594
Slackia_A	Aureimonas_A_501548	0.95	0.164459	0.835541
Choladousia	Methanobrevibacter_D_1148	0.95	0.164769	0.835231
Nanosyncoccus	Arthrobacter_B	0.95	0.164864	0.835136
Mailhella	Phocaeicola_A_858004	0.95	0.164918	0.835082
DSXL01	Turicibacter	0.95	0.165088	0.834912
Frigoribacterium	Methylobacterium	0.95	0.165265	0.834735
UBA3789	Mogibacterium	0.95	0.165268	0.834732
Suipraeoptans	Clostridium_N_143832	0.95	0.165441	0.834559
Hornefia	Duncaniella	0.95	0.165552	0.834448
Paramuribaculum	UBA1436	0.95	0.16562	0.83438
Hornefia	Actinomyces	0.95	0.165622	0.834378
Shuttleworthia	Eubacterium_I	0.95	0.165719	0.834281
UBA3789	FD2005	0.95	0.165742	0.834258
RUG13615	Frigoribacterium	0.95	0.165796	0.834204
DSXL01	Methylobacterium	0.95	0.165801	0.834199
RUG13615	Clostridium_N_143832	0.94	0.166014	0.833986
BICA1-8	Scybalousia	0.94	0.166144	0.833856
UMGS1994	CAG-273	0.94	0.166372	0.833628
Methylobacterium	Christensenella	0.94	0.166486	0.833514
Olsenella_H_405128	UBA2730	0.94	0.166541	0.833459
Olsenella_H_405128	RUG721	0.94	0.166621	0.833379
Hornefia	Eubacterium_I	0.94	0.166748	0.833252
Frigoribacterium	CAG-1427	0.94	0.166831	0.833169
Nanosyncoccus	Duncaniella	0.94	0.16697	0.83303
Mogibacterium	RUG410	0.94	0.167152	0.832848
UBA1066	RUG521	0.94	0.167226	0.832774
Aureimonas_A_501548	Nanosyncoccus	0.94	0.167267	0.832733
Thermophilibacter	RUG521	0.94	0.167608	0.832392
Christensenella	Eubacterium_I	0.94	0.167694	0.832306
Aureimonas_A_501548	RUG13038	0.94	0.167854	0.832146
Berryella	Eubacterium_I	0.94	0.167877	0.832123
Frigoribacterium	Clostridium_N_143832	0.94	0.167922	0.832078
RUG13615	Bulleidia	0.94	0.168246	0.831754
Acinetobacter	Pradoshia	0.94	0.168325	0.831675
Butyrivibrio_A_168226	RUG13615	0.94	0.168689	0.831311
CAG-1427	RUG12438	0.94	0.168754	0.831246
UMGS1994	Mogibacterium	0.94	0.168801	0.831199
CAG-914	UBA1436	0.94	0.169005	0.830995
Turicibacter	Saccharofermentans	0.94	0.169062	0.830938
RUG13615	Akkermansia	0.94	0.169325	0.830675
BX12	CAG-710	0.94	0.169403	0.830597
UBA636	Devosia_A_502124	0.94	0.169573	0.830427
Phocaeicola_A_858004	Gallalistipes	0.94	0.169575	0.830425
Adlercreutzia_404218	Romboutsia_B	0.94	0.169622	0.830378
FD2005	UBA2730	0.94	0.169678	0.830322
Olsenella_H_405128	Bulleidia	0.94	0.169725	0.830275
Slackia_A	RUG12438	0.94	0.16975	0.83025
Hornefia	Berryella	0.94	0.16975	0.83025
Paraeggerthella	CAG-710	0.94	0.169768	0.830232
Nitrosocosmicus	Actinomyces	0.94	0.169895	0.830105
UBA2730	CAG-793	0.94	0.170014	0.829986
RUG705	CAG-302	0.94	0.170021	0.829979
Coprococcus_A_187866	Thermophilibacter	0.94	0.170314	0.829686
Butyrivibrio_A_168226	Devosia_A_502124	0.94	0.170397	0.829603
Parafannyhessea	Olsenella_H_405128	0.94	0.170457	0.829543
Nanosyncoccus	Butyrivibrio_A_168226	0.94	0.170546	0.829454
Nanosyncoccus	RUG13615	0.94	0.17065	0.82935
Nitrosocosmicus	Christensenella	0.94	0.17074	0.82926
Suipraeoptans	Coprococcus_A_187866	0.94	0.170892	0.829108
Frigoribacterium	UBA2730	0.94	0.170894	0.829106
Romboutsia_B	Saccharofermentans	0.94	0.17093	0.82907
RUG705	Peribacillus_301373	0.94	0.171015	0.828985
Choladousia	Butyrivibrio_A_168226	0.94	0.171089	0.828911
Aureimonas_A_501548	Olsenella_H_405128	0.94	0.171153	0.828847
UBA1066	Suipraeoptans	0.94	0.171177	0.828823
CAG-1427	Saccharofermentans	0.94	0.171292	0.828708
Scybalousia	Eubacterium_R	0.94	0.171354	0.828646
Paraeggerthella	Mogibacterium	0.94	0.171398	0.828602
CAG-1427	UBA2730	0.94	0.171497	0.828503
Reyranella	UBA1930	0.94	0.171543	0.828457
Eubacterium_N	Evtepia	0.94	0.171559	0.828441
CAG-353	Ruminococcus_F	0.94	0.171565	0.828435
Methylobacterium	Saccharofermentans	0.94	0.171692	0.828308
Mogibacterium	RUG521	0.94	0.171752	0.828248
Slackia_A	Peribacillus_301373	0.94	0.171826	0.828174
Pradoshia	Bariatricus	0.94	0.171867	0.828133
RUG13038	Actinomyces	0.94	0.172086	0.827914
Akkermansia	Thermophilibacter	0.94	0.172284	0.827716
Neorhizobium	Flexilinea	0.94	0.172321	0.827679
Arthrobacter_B	RUG705	0.94	0.172532	0.827468
Akkermansia	Shuttleworthia	0.94	0.172644	0.827356
Clostridium_N_143832	RUG521	0.94	0.172707	0.827293
Turicibacter	Methanobrevibacter_D_1148	0.94	0.172798	0.827202
UBA3789	Olsenella_H_405128	0.94	0.172864	0.827136
Aureimonas_A_501548	Turicibacter	0.94	0.172928	0.827072
Slackia_A	Arthrobacter_B	0.94	0.172993	0.827007
CAG-914	Soleaferrea	0.94	0.17322	0.82678
UBA4285	Eubacterium_T	0.94	0.17342	0.82658
Suipraeoptans	CAG-710	0.94	0.173478	0.826522
CAG-710	CAG-269	0.94	0.173599	0.826401
Adlercreutzia_404218	Devosia_A_502124	0.94	0.173711	0.826289
Slackia_A	Adlercreutzia_404218	0.94	0.173849	0.826151
Turicibacter	Christensenella	0.94	0.17411	0.82589
Arthrobacter_B	Eubacterium_I	0.94	0.17418	0.82582
Aureimonas_A_501548	Methylobacterium	0.94	0.17437	0.82563
Paraeggerthella	CAG-273	0.94	0.174384	0.825616
Slackia_A	Saccharofermentans	0.94	0.174418	0.825582
Nanosyncoccus	UBA2730	0.94	0.174465	0.825535
DSXL01	CAG-273	0.94	0.174465	0.825535
Frigoribacterium	Duncaniella	0.94	0.174582	0.825418
Aureimonas_A_501548	Eubacterium_I	0.94	0.174707	0.825293
Faecisoma	BICA1-8	0.94	0.174863	0.825137
Paraeggerthella	RUG705	0.94	0.175048	0.824952
RUG410	Clostridium_N_143832	0.94	0.175076	0.824924
Peribacillus_301373	Eubacterium_I	0.94	0.17513	0.82487
Gabonibacter	Acutalibacter	0.94	0.175163	0.824837
Bulleidia	Saccharofermentans	0.94	0.175395	0.824605
CAG-873	Alistipes_A_871400	0.94	0.175533	0.824467
Hornefia	Bariatricus	0.94	0.175554	0.824446
2024-02-14	Acutalibacter	0.94	0.175592	0.824408
RUG13615	Peribacillus_301373	0.94	0.175632	0.824368
Scybalousia	CAG-269	0.94	0.17574	0.82426
Adlercreutzia_404218	CAG-793	0.94	0.175883	0.824117
RUG721	CAG-710	0.94	0.175913	0.824087
Aureimonas_A_501548	Hornefia	0.94	0.176056	0.823944
Butyrivibrio_A_168226	Mogibacterium	0.94	0.176128	0.823872
UMGS1994	Thermophilibacter	0.94	0.176218	0.823782
UBA1066	QAMH01	0.94	0.176367	0.823633
Paraeggerthella	CAG-269	0.94	0.176516	0.823484
RUG721	Shuttleworthia	0.94	0.176588	0.823412
Mogibacterium	QAMH01	0.94	0.176633	0.823367
RUG13615	Arthrobacter_B	0.94	0.176786	0.823214
CAG-273	RUG12438	0.94	0.17683	0.82317
Frigoribacterium	RUG705	0.94	0.176924	0.823076
Frigoribacterium	Shuttleworthia	0.94	0.176976	0.823024
UBA6984	Zag111	0.94	0.177374	0.822626
RUG410	Bariatricus	0.94	0.177424	0.822576
Hornefia	UBA2730	0.94	0.177555	0.822445
RUG13615	CAG-273	0.94	0.177613	0.822387
Marvinbryantia	CAG-710	0.94	0.177646	0.822354
Romboutsia_B	UBA2730	0.94	0.17769	0.82231
Coprococcus_A_187866	Eubacterium_R	0.94	0.177773	0.822227
Methylobacterium	CAG-793	0.94	0.177864	0.822136
Marvinbryantia	Scybalousia	0.94	0.177881	0.822119
CACXMZ01	Limivicinus	0.94	0.177885	0.822115
Nanosyncoccus	Christensenella	0.94	0.177891	0.822109
Slackia_A	Christensenella	0.94	0.177891	0.822109
Paraeggerthella	Scybalousia	0.94	0.177917	0.822083
DSXL01	RUG705	0.94	0.178412	0.821588
PeH17	RUG13077	0.94	0.178415	0.821585
Mogibacterium	Berryella	0.94	0.179084	0.820916
Pradoshia	Eubacterium_I	0.94	0.179127	0.820873
Paraeggerthella	RUG12438	0.94	0.17919	0.82081
DSXL01	Devosia_A_502124	0.94	0.179196	0.820804
Schaedlerella	Anaerofustis	0.94	0.17928	0.82072
CAG-710	RUG521	0.94	0.179302	0.820698
JC017	Eubacterium_T	0.94	0.179428	0.820572
Marvinbryantia	Thermophilibacter	0.94	0.179449	0.820551
Nitrosocosmicus	Methylobacterium	0.94	0.17954	0.82046
UBA3789	Hornefia	0.94	0.179695	0.820305
Slackia_A	Thermophilibacter	0.94	0.180049	0.819951
Slackia_A	Actinomyces	0.94	0.1801	0.8199
CACXMZ01	FD2005	0.93	0.180316	0.819684
CAG-1427	QAMH01	0.93	0.180555	0.819445
Bariatricus	Copromorpha	0.93	0.180577	0.819423
Nanosyncoccus	Saccharofermentans	0.93	0.180692	0.819308
Bacillus_AD	RUG12783	0.93	0.180701	0.819299
Eubacterium_R	Thermophilibacter	0.93	0.18079	0.81921
Butyrivibrio_A_168226	RUG705	0.93	0.180822	0.819178
RUG705	Actinomyces	0.93	0.180919	0.819081
Frigoribacterium	Romboutsia_B	0.93	0.181101	0.818899
Treponema_D	UBA3402	0.93	0.181118	0.818882
RUG705	Eubacterium_I	0.93	0.181325	0.818675
RUG13615	Scybalousia	0.93	0.181358	0.818642
Clostridium_N_143832	Saccharofermentans	0.93	0.181396	0.818604
Scybalousia	Eubacterium_T	0.93	0.181403	0.818597
Christensenella	CAG-793	0.93	0.181432	0.818568
Suipraeoptans	Scybalousia	0.93	0.181549	0.818451
UBA3789	QAMH01	0.93	0.181622	0.818378
Butyrivibrio_A_168226	Shuttleworthia	0.93	0.18173	0.81827
RUG721	Methanobrevibacter_A	0.93	0.181754	0.818246
Ventrisoma	Paramuribaculum	0.93	0.181877	0.818123
UMGS1994	CAG-710	0.93	0.182049	0.817951
Romboutsia_B	Actinomyces	0.93	0.182057	0.817943
Parafannyhessea	RUG13615	0.93	0.18219	0.81781
DSXL01	RUG13615	0.93	0.182231	0.817769
CACXMZ01	Eubacterium_I	0.93	0.182254	0.817746
Anaerobutyricum	CAG-710	0.93	0.182436	0.817564
CAG-914	43-108	0.93	0.182528	0.817472
Coprococcus_A_187866	RUG521	0.93	0.182588	0.817412
Olsenella_H_405128	Thermophilibacter	0.93	0.182853	0.817147
BX12	Eubacterium_I	0.93	0.182911	0.817089
Nanosyncoccus	Eubacterium_I	0.93	0.183013	0.816987
Clostridium_N_143832	FD2005	0.93	0.183029	0.816971
UBA3789	CAG-273	0.93	0.18332	0.81668
Olsenella_H_405128	CAG-273	0.93	0.183378	0.816622
Berryella	Clostridium_N_143832	0.93	0.183467	0.816533
Olsenella_H_405128	Clostridium_N_143832	0.93	0.183766	0.816234
Mogibacterium	Akkermansia	0.93	0.183784	0.816216
CAG-353	Ruminococcus_C_59129	0.93	0.183806	0.816194
UMGS1994	Scybalousia	0.93	0.183878	0.816122
CACXMZ01	Thermophilibacter	0.93	0.184539	0.815461
Anaerobutyricum	Mogibacterium	0.93	0.184623	0.815377
RUG410	Eubacterium_T	0.93	0.184631	0.815369
Hornefia	Saccharofermentans	0.93	0.18476	0.81524
RUG13615	CAG-710	0.93	0.185199	0.814801
Choladousia	Devosia_A_502124	0.93	0.185279	0.814721
Parafannyhessea	Paraeggerthella	0.93	0.18528	0.81472
Slackia_A	Olsenella_H_405128	0.93	0.185327	0.814673
RUG705	Saccharofermentans	0.93	0.185387	0.814613
Clostridium_N_143832	Akkermansia	0.93	0.185483	0.814517
CAG-273	FD2005	0.93	0.1856	0.8144
Coprococcus_A_187866	QAMH01	0.93	0.18571	0.81429
RUG721	Acinetobacter	0.93	0.185715	0.814285
CAG-710	Eubacterium_I	0.93	0.185777	0.814223
Terrisporobacter	Clostridioides_A	0.93	0.185843	0.814157
Berryella	Shuttleworthia	0.93	0.185936	0.814064
Adlercreutzia_404218	RUG705	0.93	0.185971	0.814029
Adlercreutzia_404218	Eubacterium_I	0.93	0.185977	0.814023
Frigoribacterium	Hornefia	0.93	0.185995	0.814005
CACXMZ01	Mogibacterium	0.93	0.186102	0.813898
DSXL01	CAG-710	0.93	0.186117	0.813883
Butyrivibrio_A_168226	Methylobacterium	0.93	0.186117	0.813883
Anaerobutyricum	CAG-273	0.93	0.186249	0.813751
Paraeggerthella	Bariatricus	0.93	0.186394	0.813606
Olsenella_H_405128	Frigoribacterium	0.93	0.186632	0.813368
Duncaniella	Eubacterium_I	0.93	0.186862	0.813138
UBA3789	RUG13615	0.93	0.186877	0.813123
Coprosoma	UBA636	0.93	0.187365	0.812635
Hornefia	QAMH01	0.93	0.187469	0.812531
Alistipes_A_871400	Phocaeicola_A_858004	0.93	0.187487	0.812513
UBA1732	UBA71	0.93	0.187532	0.812468
Clostridium_N_143832	Coprococcus_A_187866	0.93	0.187795	0.812205
DSXL01	RUG13038	0.93	0.187802	0.812198
RUG13615	Eubacterium_I	0.93	0.187931	0.812069
CACXMZ01	Suipraeoptans	0.93	0.187999	0.812001
Aureimonas_A_501548	Clostridium_N_143832	0.93	0.18833	0.81167
UBA3789	CAG-710	0.93	0.188451	0.811549
Thermophilibacter	Saccharofermentans	0.93	0.188514	0.811486
Actinomyces	Eubacterium_I	0.93	0.188548	0.811452
RUG13038	Devosia_A_502124	0.93	0.18857	0.81143
RUG721	Devosia_A_502124	0.93	0.188785	0.811215
Neorhizobium	Romboutsia_B	0.93	0.188986	0.811014
Devosia_A_502124	Akkermansia	0.93	0.188995	0.811005
CACXMZ01	RUG721	0.93	0.189058	0.810942
Scybalousia	CAG-302	0.93	0.189199	0.810801
DSXL01	Thermophilibacter	0.93	0.189234	0.810766
CAG-273	Christensenella	0.93	0.18932	0.81068
Devosia_A_502124	Duncaniella	0.93	0.189361	0.810639
RUG13615	Christensenella	0.93	0.189384	0.810616
Clostridium_N_143832	Peribacillus_301373	0.93	0.189424	0.810576
Clostridium_N_143832	Christensenella	0.93	0.189462	0.810538
DSXL01	Coprococcus_A_187866	0.93	0.18965	0.81035
Frigoribacterium	Turicibacter	0.93	0.189651	0.810349
Adlercreutzia_404218	Clostridium_N_143832	0.93	0.189734	0.810266
Slackia_A	CACXMZ01	0.93	0.189805	0.810195
C-53	Solibacillus	0.93	0.189896	0.810104
Devosia_A_502124	QAMH01	0.93	0.189945	0.810055
Arthrobacter_B	Clostridium_N_143832	0.93	0.190381	0.809619
Marvinbryantia	Coprococcus_A_187866	0.93	0.190474	0.809526
UBA3789	RUG13038	0.93	0.190496	0.809504
Victivallis	43-108	0.93	0.190516	0.809484
Thermophilibacter	Christensenella	0.93	0.190565	0.809435
Olsenella_H_405128	CAG-710	0.93	0.190656	0.809344
RUG13038	CAG-793	0.93	0.190764	0.809236
Longicatena	UBA71	0.93	0.190833	0.809167
Butyrivibrio_A_168226	Romboutsia_B	0.93	0.190953	0.809047
Mobilisporobacter	UBA1436	0.93	0.191024	0.808976
Choladousia	Adlercreutzia_404218	0.93	0.191051	0.808949
UMGS1449	Eubacterium_R	0.93	0.191128	0.808872
CACXMZ01	Copromorpha	0.93	0.191138	0.808862
Scybalousia	FD2005	0.93	0.19123	0.80877
Arthrobacter_B	Thermophilibacter	0.93	0.191292	0.808708
Butyrivibrio_A_168226	Coprococcus_A_187866	0.93	0.191348	0.808652
Slackia_A	QAMH01	0.93	0.191416	0.808584
Choladousia	Thermophilibacter	0.93	0.191436	0.808564
Peribacillus_301373	Thermophilibacter	0.93	0.191721	0.808279
UBA3789	Eubacterium_I	0.93	0.19177	0.80823
Anaerobutyricum	Suipraeoptans	0.93	0.191859	0.808141
Olsenella_H_405128	Mogibacterium	0.93	0.191896	0.808104
UBA1066	Berryella	0.93	0.19206	0.80794
Clostridium_N_143832	Actinomyces	0.93	0.192152	0.807848
Mogibacterium	Christensenella	0.93	0.19232	0.80768
UMGS1994	Coprococcus_A_187866	0.93	0.192463	0.807537
RUG13615	Actinomyces	0.93	0.192493	0.807507
Aureimonas_A_501548	Mogibacterium	0.93	0.192506	0.807494
Harryflintia	Oscillibacter	0.93	0.192531	0.807469
Devosia_A_502124	Romboutsia_B	0.93	0.192585	0.807415
Scybalousia	RUG521	0.93	0.192596	0.807404
Berryella	Scybalousia	0.93	0.192664	0.807336
RUG13615	Hornefia	0.93	0.192705	0.807295
Bariatricus	CAG-269	0.93	0.19279	0.80721
Pradoshia	Thermophilibacter	0.93	0.192861	0.807139
Aureimonas_A_501548	RUG705	0.93	0.192883	0.807117
Butyrivibrio_A_168226	CAG-273	0.93	0.192953	0.807047
Hornefia	Acinetobacter	0.93	0.19309	0.80691
RUG705	Duncaniella	0.93	0.193138	0.806862
Arthrobacter_B	CAG-273	0.93	0.19316	0.80684
RUG705	Christensenella	0.93	0.193176	0.806824
Clostridium_N_143832	Eubacterium_I	0.93	0.193284	0.806716
Peribacillus_301373	CAG-273	0.93	0.19329	0.80671
Flexilinea	CAG-793	0.93	0.193446	0.806554
Turicibacter	Neorhizobium	0.93	0.193546	0.806454
Pradoshia	RUG12438	0.93	0.193548	0.806452
RUG13038	UBA636	0.93	0.193645	0.806355
ZJ304	Solibacillus	0.92	0.193821	0.806179
Clostridium_N_143832	BICA1-8	0.92	0.194015	0.805985
Methylobacterium	Actinomyces	0.92	0.19402	0.80598
CAG-1427	CAG-269	0.92	0.194025	0.805975
Frigoribacterium	CAG-273	0.92	0.194123	0.805877
RUG12438	CAG-269	0.92	0.194241	0.805759
CACXMZ01	Eubacterium_R	0.92	0.19428	0.80572
Slackia_A	Duncaniella	0.92	0.194316	0.805684
Scybalousia	Eubacterium_I	0.92	0.194408	0.805592
Choladousia	RUG721	0.92	0.194468	0.805532
CAG-269	Eubacterium_I	0.92	0.194545	0.805455
Neorhizobium	CAG-793	0.92	0.194738	0.805262
Treponema_D	F0058	0.92	0.194843	0.805157
UBA1066	Duncaniella	0.92	0.195047	0.804953
Victivallis	CAG-267	0.92	0.195062	0.804938
Slackia_A	UBA2730	0.92	0.195104	0.804896
Mogibacterium	RUG12438	0.92	0.195109	0.804891
Monoglobus	Parabacteroides_B_862066	0.92	0.195112	0.804888
CACXMZ01	Akkermansia	0.92	0.195113	0.804887
CACXMZ01	RUG705	0.92	0.195125	0.804875
Olsenella_H_405128	Paraeggerthella	0.92	0.195163	0.804837
Duncaniella	CAG-793	0.92	0.1952	0.8048
RUG705	QAMH01	0.92	0.195267	0.804733
GWE2-31-10	Pygmaiobacter	0.92	0.195284	0.804716
DSXL01	Scybalousia	0.92	0.195444	0.804556
Acinetobacter	Thermophilibacter	0.92	0.195481	0.804519
RUG410	Scybalousia	0.92	0.195516	0.804484
Coprococcus_A_187866	FD2005	0.92	0.195617	0.804383
Bulleidia	Methanobrevibacter_A	0.92	0.19568	0.80432
RUG13615	Duncaniella	0.92	0.19597	0.80403
Nitrosocosmicus	Romboutsia_B	0.92	0.196015	0.803985
Butyrivibrio_A_168226	CAG-793	0.92	0.196199	0.803801
Mogibacterium	Arthrobacter_B	0.92	0.196222	0.803778
Mogibacterium	Peribacillus_301373	0.92	0.196243	0.803757
RUG13615	Adlercreutzia_404218	0.92	0.196338	0.803662
Bulleidia	Acinetobacter	0.92	0.196506	0.803494
Frigoribacterium	Acinetobacter	0.92	0.19657	0.80343
Nanosyncoccus	QAMH01	0.92	0.19682	0.80318
Paraeggerthella	Suipraeoptans	0.92	0.196902	0.803098
Choladousia	Eubacterium_I	0.92	0.197021	0.802979
Devosia_A_502124	Christensenella	0.92	0.197081	0.802919
Mobilitalea	CAG-475	0.92	0.197192	0.802808
Nanosyncoccus	CAG-269	0.92	0.197425	0.802575
UBA4285	RUG410	0.92	0.197544	0.802456
Harryflintia	RUG350	0.92	0.19755	0.80245
Bulleidia	CAG-793	0.92	0.197739	0.802261
Methanobrevibacter_A	CAG-793	0.92	0.197757	0.802243
Choladousia	Arthrobacter_B	0.92	0.197907	0.802093
Ruminococcus_D	WRAY01	0.92	0.197988	0.802012
Butyrivibrio_A_168226	Clostridium_N_143832	0.92	0.198076	0.801924
Choladousia	QAMH01	0.92	0.198086	0.801914
UBA1066	Peribacillus_301373	0.92	0.198194	0.801806
Anaerobutyricum	Clostridium_N_143832	0.92	0.198334	0.801666
UBA1066	UMGS1994	0.92	0.198507	0.801493
CAG-353	Corynebacterium	0.92	0.198577	0.801423
Akkermansia	Scybalousia	0.92	0.198595	0.801405
Bulleidia	Devosia_A_502124	0.92	0.198617	0.801383
UMGS1449	Actinomyces	0.92	0.198657	0.801343
Mogibacterium	Saccharofermentans	0.92	0.198764	0.801236
UBA1066	Arthrobacter_B	0.92	0.198803	0.801197
Frigoribacterium	Scybalousia	0.92	0.198839	0.801161
Phascolarctobacterium_A	Anaerotignum_189125	0.92	0.198849	0.801151
Paraeggerthella	CAG-1427	0.92	0.198955	0.801045
Olsenella_H_405128	Scybalousia	0.92	0.199149	0.800851
UMGS1071	C-53	0.92	0.199172	0.800828
Aureimonas_A_501548	RUG13615	0.92	0.199197	0.800803
Choladousia	Peribacillus_301373	0.92	0.199248	0.800752
Nitrosocosmicus	Adlercreutzia_404218	0.92	0.199286	0.800714
BX12	Thermophilibacter	0.92	0.199678	0.800322
Paraeggerthella	Anaerobutyricum	0.92	0.199957	0.800043
Aureimonas_A_501548	Thermophilibacter	0.92	0.200029	0.799971
Choladousia	Akkermansia	0.92	0.200044	0.799956
Coprosoma	CAG-793	0.92	0.200087	0.799913
CAG-273	QAMH01	0.92	0.200241	0.799759
Frigoribacterium	Devosia_A_502124	0.92	0.200308	0.799692
Limenecus	UBA6984	0.92	0.200324	0.799676
Neorhizobium	Clostridioides_A	0.92	0.200386	0.799614
RUG13038	Christensenella	0.92	0.200533	0.799467
Paraeggerthella	Clostridium_N_143832	0.92	0.200608	0.799392
CAG-273	Actinomyces	0.92	0.200756	0.799244
BX12	Bariatricus	0.92	0.200783	0.799217
Saccharofermentans	Eubacterium_I	0.92	0.20079	0.79921
Frigoribacterium	Coprococcus_A_187866	0.92	0.200824	0.799176
Nanosyncoccus	CAG-302	0.92	0.20085	0.79915
Butyrivibrio_A_168226	RUG13038	0.92	0.200887	0.799113
RUG410	BICA1-8	0.92	0.200915	0.799085
Anaerobutyricum	Copromorpha	0.92	0.20094	0.79906
UBA3789	Acinetobacter	0.92	0.200981	0.799019
DSXL01	Nitrosocosmicus	0.92	0.201086	0.798914
Devosia_A_502124	Actinomyces	0.92	0.201163	0.798837
CAG-269	Copromorpha	0.92	0.201166	0.798834
CACXMZ01	UMGS1994	0.92	0.201204	0.798796
RUG13615	CAG-302	0.92	0.201448	0.798552
Methanobrevibacter_D_1148	Romboutsia_B	0.92	0.201575	0.798425
Romboutsia_B	Duncaniella	0.92	0.201711	0.798289
Coprosoma	UBA2730	0.92	0.201723	0.798277
Slackia_A	CAG-269	0.92	0.201755	0.798245
UBA2730	Eubacterium_I	0.92	0.201762	0.798238
Marvinbryantia	UMGS1449	0.92	0.201967	0.798033
Pradoshia	Coprococcus_A_187866	0.92	0.202051	0.797949
Choladousia	Marvinbryantia	0.92	0.202052	0.797948
Olsenella_H_405128	Eubacterium_I	0.92	0.202052	0.797948
Faecisoma	Clostridium_N_143832	0.92	0.202068	0.797932
Akkermansia	CAG-273	0.92	0.202068	0.797932
Aureimonas_A_501548	Nitrosocosmicus	0.92	0.202122	0.797878
UBA4285	Paraeggerthella	0.92	0.202283	0.797717
Anaerosacchariphilus	Anaerotignum_189125	0.92	0.202309	0.797691
Anaerobutyricum	CAG-1427	0.92	0.202398	0.797602
Berryella	Devosia_A_502124	0.92	0.202583	0.797417
CAG-605	Anaerofustis	0.92	0.202622	0.797378
Faecisoma	Scybalousia	0.92	0.202687	0.797313
Adlercreutzia_404218	Methylobacterium	0.92	0.202929	0.797071
Ruminococcus_C_59129	Paludicola	0.92	0.203001	0.796999
Methylobacterium	QAMH01	0.92	0.203058	0.796942
UBA3789	CAG-302	0.92	0.203193	0.796807
CACXMZ01	Berryella	0.92	0.20328	0.79672
BICA1-8	CAG-710	0.92	0.203349	0.796651
QALR01	RUG13077	0.92	0.203413	0.796587
Coprococcus_A_187866	Christensenella	0.92	0.203431	0.796569
Choladousia	Actinomyces	0.92	0.203453	0.796547
Anaerobutyricum	Bulleidia	0.92	0.203518	0.796482
Arthrobacter_B	Devosia_A_502124	0.92	0.203519	0.796481
UBA4285	CAG-710	0.92	0.20366	0.79634
Nanosyncoccus	Paraeggerthella	0.92	0.203728	0.796272
CACXMZ01	Coprococcus_A_187866	0.92	0.203833	0.796167
Adlercreutzia_404218	Mogibacterium	0.92	0.203861	0.796139
UMGS1449	RUG521	0.92	0.203957	0.796043
Marvinbryantia	CACXMZ01	0.92	0.203961	0.796039
Choladousia	Bulleidia	0.92	0.203986	0.796014
UMGS1994	UMGS1449	0.92	0.204003	0.795997
Adlercreutzia_404218	Turicibacter	0.92	0.20402	0.79598
Slackia_A	Coprococcus_A_187866	0.92	0.20403	0.79597
Berryella	CAG-273	0.92	0.204085	0.795915
CAG-710	FD2005	0.92	0.204085	0.795915
CAG-273	Saccharofermentans	0.92	0.204114	0.795886
Devosia_A_502124	Peribacillus_301373	0.92	0.204347	0.795653
UMGS1449	FD2005	0.92	0.204359	0.795641
RUG13615	Coprococcus_A_187866	0.92	0.204371	0.795629
Victivallis	UBA1436	0.92	0.204423	0.795577
UBA4285	Schaedlerella	0.92	0.204429	0.795571
Anaerofilum_73741	Shuttleworthia	0.92	0.204608	0.795392
Frigoribacterium	CAG-793	0.92	0.204608	0.795392
Methanobrevibacter_A	Eubacterium_I	0.92	0.204651	0.795349
UBA4285	BICA1-8	0.92	0.204756	0.795244
Acinetobacter	CAG-1427	0.92	0.204812	0.795188
Parafannyhessea	Suipraeoptans	0.92	0.204855	0.795145
ZJ304	Onthomonas	0.92	0.204912	0.795088
Paraeggerthella	CAG-302	0.92	0.204937	0.795063
Anaerobutyricum	Bariatricus	0.92	0.205221	0.794779
Nanosyncoccus	Coprococcus_A_187866	0.92	0.20532	0.79468
Parafannyhessea	Acinetobacter	0.92	0.205352	0.794648
Actinomyces	CAG-793	0.92	0.205417	0.794583
RUG410	CAG-1427	0.92	0.205663	0.794337
Nitrosocosmicus	Arthrobacter_B	0.92	0.205663	0.794337
Clostridium_N_143832	Duncaniella	0.92	0.205693	0.794307
CACXMZ01	Bulleidia	0.92	0.205849	0.794151
Arthrobacter_B	Romboutsia_B	0.92	0.206013	0.793987
Parafannyhessea	UBA1066	0.92	0.206031	0.793969
Aureimonas_A_501548	Methanobrevibacter_A	0.92	0.206102	0.793898
Longicatena	Paramuribaculum	0.92	0.206132	0.793868
Faecisoma	CAG-710	0.91	0.206254	0.793746
Hornefia	CAG-269	0.91	0.206389	0.793611
Shuttleworthia	QAMH01	0.91	0.20647	0.79353
UBA1732	CAG-267	0.91	0.206472	0.793528
Frigoribacterium	CAG-710	0.91	0.206589	0.793411
Nitrosocosmicus	Peribacillus_301373	0.91	0.20672	0.79328
RUG705	UBA2730	0.91	0.206801	0.793199
Duncaniella	CAG-273	0.91	0.206864	0.793136
Acinetobacter	RUG705	0.91	0.206909	0.793091
Paraeggerthella	Copromorpha	0.91	0.207074	0.792926
CAG-267	UMGS2069	0.91	0.207116	0.792884
RUG13615	UBA1066	0.91	0.207126	0.792874
CAG-273	Thermophilibacter	0.91	0.207138	0.792862
Peribacillus_301373	Romboutsia_B	0.91	0.207204	0.792796
Mogibacterium	Actinomyces	0.91	0.207217	0.792783
RUG12438	CAG-302	0.91	0.20726	0.79274
Choladousia	FD2005	0.91	0.207282	0.792718
Christensenella	CAG-710	0.91	0.207296	0.792704
BX12	UMGS1449	0.91	0.207591	0.792409
Marvinbryantia	Romboutsia_B	0.91	0.207815	0.792185
Choladousia	UMGS1994	0.91	0.207822	0.792178
Parafannyhessea	UBA9715	0.91	0.207826	0.792174
Arthrobacter_B	RUG13038	0.91	0.208183	0.791817
Coprosoma	Methanobrevibacter_A	0.91	0.208199	0.791801
RUG13038	Peribacillus_301373	0.91	0.208507	0.791493
Hornefia	Thermophilibacter	0.91	0.208931	0.791069
RUG705	Thermophilibacter	0.91	0.208952	0.791048
Clostridium_N_143832	CAG-269	0.91	0.208978	0.791022
Adlercreutzia_404218	CAG-273	0.91	0.209017	0.790983
Nitrosocosmicus	Turicibacter	0.91	0.209043	0.790957
Turicibacter	Actinomyces	0.91	0.209062	0.790938
RUG12438	Copromorpha	0.91	0.209108	0.790892
CAG-1427	Thermophilibacter	0.91	0.209143	0.790857
Saccharofermentans	CAG-793	0.91	0.209434	0.790566
Nitrosocosmicus	Saccharofermentans	0.91	0.209435	0.790565
CACXMZ01	RUG521	0.91	0.209462	0.790538
Methanobrevibacter_A	UBA2730	0.91	0.20951	0.79049
Butyrivibrio_A_168226	Turicibacter	0.91	0.209722	0.790278
RUG472	Flexilinea	0.91	0.209733	0.790267
Mogibacterium	Duncaniella	0.91	0.209794	0.790206
Anaerofustis	Eubacterium_T	0.91	0.20982	0.79018
UBA1732	Paramuribaculum	0.91	0.209842	0.790158
Slackia_A	Shuttleworthia	0.91	0.209925	0.790075
CACXMZ01	BX12	0.91	0.209968	0.790032
Arthrobacter_B	Coprococcus_A_187866	0.91	0.210015	0.789985
RUG721	CAG-793	0.91	0.210024	0.789976
UMGS1449	CAG-269	0.91	0.21011	0.78989
Marvinbryantia	Devosia_A_502124	0.91	0.210255	0.789745
RUG13038	Akkermansia	0.91	0.210298	0.789702
Nanosyncoccus	Acinetobacter	0.91	0.210482	0.789518
Peribacillus_301373	CAG-710	0.91	0.210987	0.789013
Clostridium_N_143832	UBA2730	0.91	0.211055	0.788945
UMGS1449	CAG-273	0.91	0.211068	0.788932
RUG721	CAG-269	0.91	0.211083	0.788917
Coprococcus_A_187866	Peribacillus_301373	0.91	0.211096	0.788904
Clostridium_T	Sporofaciens	0.91	0.211141	0.788859
Choladousia	Eubacterium_R	0.91	0.211149	0.788851
Arthrobacter_B	CAG-710	0.91	0.211165	0.788835
Butyrivibrio_A_168226	Nitrosocosmicus	0.91	0.211318	0.788682
Mobilitalea	CAG-1252	0.91	0.211337	0.788663
Thermophilibacter	Actinomyces	0.91	0.211367	0.788633
Choladousia	Copromorpha	0.91	0.211483	0.788517
Bulleidia	Romboutsia_B	0.91	0.211574	0.788426
Coprosoma	Devosia_A_502124	0.91	0.211613	0.788387
DSXL01	Methanobrevibacter_D_1148	0.91	0.211634	0.788366
RUG13038	Romboutsia_B	0.91	0.211724	0.788276
Akkermansia	UMGS1449	0.91	0.211853	0.788147
Choladousia	UBA2730	0.91	0.2119	0.7881
Methanobrevibacter_B	Eubacterium_Q	0.91	0.211926	0.788074
Methylobacterium	Thermophilibacter	0.91	0.21197	0.78803
Devosia_A_502124	Eubacterium_I	0.91	0.212263	0.787737
Ructibacterium	Ruminococcus_C_58660	0.91	0.212307	0.787693
UBA2658	Faecousia	0.91	0.212333	0.787667
Adlercreutzia_404218	Thermophilibacter	0.91	0.212576	0.787424
Adlercreutzia_404257	Faecisoma	0.91	0.212588	0.787412
Anaerobutyricum	Scybalousia	0.91	0.212693	0.787307
Coprococcus_A_187866	Scybalousia	0.91	0.212695	0.787305
RUG13038	Methanobrevibacter_A	0.91	0.212844	0.787156
Methylobacterium	Neorhizobium	0.91	0.212978	0.787022
Methanobrevibacter_D_1148	Saccharofermentans	0.91	0.213016	0.786984
CACXMZ01	Pradoshia	0.91	0.213188	0.786812
Butyrivibrio_A_168226	CACXMZ01	0.91	0.213233	0.786767
UMGS1449	Peribacillus_301373	0.91	0.213241	0.786759
CACXMZ01	Shuttleworthia	0.91	0.213267	0.786733
Faecisoma	RUG705	0.91	0.213318	0.786682
Parafannyhessea	QAMH01	0.91	0.213355	0.786645
CAG-710	Eubacterium_T	0.91	0.213508	0.786492
Arthrobacter_B	UMGS1449	0.91	0.213511	0.786489
Butyrivibrio_A_168226	CAG-710	0.91	0.213623	0.786377
CAG-710	Actinomyces	0.91	0.21363	0.78637
Marvinbryantia	RUG13038	0.91	0.213657	0.786343
Olsenella_H_405128	Coprococcus_A_187866	0.91	0.213917	0.786083
UMGS1449	CAG-710	0.91	0.213922	0.786078
Eubacterium_G	Ruminococcus_F	0.91	0.213964	0.786036
Choladousia	Shuttleworthia	0.91	0.214013	0.785987
UMGS1994	Devosia_A_502124	0.91	0.21406	0.78594
Choladousia	Neorhizobium	0.91	0.214084	0.785916
Marvinbryantia	Shuttleworthia	0.91	0.214094	0.785906
Anaerobutyricum	Eubacterium_I	0.91	0.214103	0.785897
Butyrivibrio_A_168226	UBA1066	0.91	0.214111	0.785889
Pradoshia	UMGS1449	0.91	0.214242	0.785758
Shuttleworthia	Copromorpha	0.91	0.214352	0.785648
RUG13615	Anaerobutyricum	0.91	0.214367	0.785633
BX12	Coprococcus_A_187866	0.91	0.214378	0.785622
Marvinbryantia	UBA1066	0.91	0.214421	0.785579
RUG705	UMGS1449	0.91	0.214444	0.785556
Slackia_A	Paraeggerthella	0.91	0.214447	0.785553
Duncaniella	Thermophilibacter	0.91	0.21448	0.78552
Butyrivibrio_A_168226	Methanobrevibacter_A	0.91	0.21451	0.78549
UBA1066	Saccharofermentans	0.91	0.214574	0.785426
CAG-1000	ER4	0.91	0.214602	0.785398
JC017	BICA1-8	0.91	0.214624	0.785376
Clostridium_N_143832	Eubacterium_T	0.91	0.214668	0.785332
Bilifractor	Schaedlerella	0.91	0.214688	0.785312
Methylobacterium	Arthrobacter_B	0.91	0.214726	0.785274
Methanobrevibacter_D_1148	Christensenella	0.91	0.214745	0.785255
Phascolarctobacterium_A	Alistipes_A_871400	0.91	0.214767	0.785233
RUG410	RUG705	0.91	0.214777	0.785223
Shuttleworthia	Methanobrevibacter_A	0.91	0.21478	0.78522
Scybalousia	Peribacillus_301373	0.91	0.214811	0.785189
RUG13615	Bariatricus	0.91	0.214825	0.785175
Coprococcus_A_187866	Duncaniella	0.91	0.214925	0.785075
Nitrosocosmicus	UBA2730	0.91	0.215049	0.784951
Aureimonas_A_501548	CAG-273	0.91	0.215146	0.784854
Arthrobacter_B	Shuttleworthia	0.91	0.215176	0.784824
CAG-1000	CAG-914	0.91	0.21519	0.78481
UBA1732	Longicatena	0.91	0.215251	0.784749
Peribacillus_301373	Shuttleworthia	0.91	0.215263	0.784737
Adlercreutzia_404218	Scybalousia	0.91	0.215265	0.784735
UMGS1449	CAG-1427	0.91	0.215278	0.784722
Emergencia	JC017	0.91	0.215343	0.784657
Anaerobutyricum	Eubacterium_R	0.91	0.215427	0.784573
Olsenella_H_405128	UMGS1449	0.91	0.215495	0.784505
UMGS1994	Shuttleworthia	0.91	0.215602	0.784398
UBA2813	Eubacterium_Q	0.91	0.21564	0.78436
RUG705	BICA1-8	0.91	0.215649	0.784351
UBA3789	RUG12438	0.91	0.215722	0.784278
Methylobacterium	Peribacillus_301373	0.91	0.215812	0.784188
Methylobacterium	Devosia_A_502124	0.91	0.215859	0.784141
Marvinbryantia	Methylobacterium	0.91	0.215863	0.784137
Arthrobacter_B	Scybalousia	0.91	0.215974	0.784026
RUG410	CAG-269	0.91	0.216048	0.783952
CACXMZ01	Scybalousia	0.91	0.21607	0.78393
RUG13615	CACXMZ01	0.91	0.216083	0.783917
CAG-793	QAMH01	0.91	0.216103	0.783897
UMGS1994	Romboutsia_B	0.91	0.21616	0.78384
Slackia_A	CAG-302	0.91	0.216232	0.783768
Anaerobutyricum	Limivicinus	0.91	0.216305	0.783695
Bulleidia	CAG-269	0.91	0.216369	0.783631
Olsenella_H_405128	CAG-302	0.91	0.216426	0.783574
UBA4285	CAG-273	0.91	0.216568	0.783432
Berryella	CAG-710	0.91	0.216628	0.783372
Romboutsia_B	QAMH01	0.91	0.21674	0.78326
Aureimonas_A_501548	Scybalousia	0.91	0.216781	0.783219
Anaerobutyricum	Thermophilibacter	0.91	0.216861	0.783139
CAG-710	Saccharofermentans	0.91	0.216978	0.783022
Marvinbryantia	Nitrosocosmicus	0.91	0.217001	0.782999
Akkermansia	Coprococcus_A_187866	0.91	0.217145	0.782855
UMGS1449	Copromorpha	0.91	0.217192	0.782808
RUG705	Coprococcus_A_187866	0.91	0.217243	0.782757
Akkermansia	CAG-710	0.91	0.21746	0.78254
Faecisoma	Eubacterium_T	0.91	0.217517	0.782483
Mogibacterium	Eubacterium_T	0.91	0.217636	0.782364
Anaerosacchariphilus	Enterenecus	0.91	0.217764	0.782236
UBA3789	Bariatricus	0.91	0.21784	0.78216
Anaerobutyricum	RUG705	0.91	0.217845	0.782155
Clostridium_N_143832	QAMH01	0.91	0.217857	0.782143
UBA4285	Mogibacterium	0.91	0.217909	0.782091
Scybalousia	Actinomyces	0.91	0.217918	0.782082
UMGS1449	Christensenella	0.9	0.218011	0.781989
Devosia_A_502124	Shuttleworthia	0.9	0.218083	0.781917
Butyrivibrio_A_168226	Scybalousia	0.9	0.218219	0.781781
CACXMZ01	Peribacillus_301373	0.9	0.218269	0.781731
Paraeggerthella	Bulleidia	0.9	0.218463	0.781537
Butyrivibrio_A_168226	UMGS1449	0.9	0.218498	0.781502
CACXMZ01	CAG-1427	0.9	0.218498	0.781502
UBA1427	CAG-313	0.9	0.218595	0.781405
CACXMZ01	Arthrobacter_B	0.9	0.218604	0.781396
Devosia_A_502124	Thermophilibacter	0.9	0.21889	0.78111
Paraeggerthella	Thermophilibacter	0.9	0.219086	0.780914
UBA1066	Actinomyces	0.9	0.219131	0.780869
Acinetobacter	Eubacterium_I	0.9	0.219287	0.780713
Nanosyncoccus	Anaerobutyricum	0.9	0.219326	0.780674
BX12	RUG12438	0.9	0.219368	0.780632
Nanosyncoccus	UMGS1449	0.9	0.219398	0.780602
Anaerobutyricum	RUG521	0.9	0.219501	0.780499
RUG410	RUG12438	0.9	0.219568	0.780432
Pradoshia	CAG-302	0.9	0.219634	0.780366
Paraeggerthella	Pradoshia	0.9	0.219771	0.780229
Nitrosocosmicus	UMGS1449	0.9	0.219798	0.780202
Reyranella	Ralstonia	0.9	0.219851	0.780149
RUG721	Romboutsia_B	0.9	0.219926	0.780074
Choladousia	Berryella	0.9	0.220024	0.779976
Bacteroides_H	UBA1711	0.9	0.22003	0.77997
Romboutsia_B	Eubacterium_R	0.9	0.220037	0.779963
UBA1066	Eubacterium_R	0.9	0.220095	0.779905
Mobilitalea	UBA2813	0.9	0.220109	0.779891
Aureimonas_A_501548	Methanobrevibacter_D_1148	0.9	0.220137	0.779863
RUG721	Methylobacterium	0.9	0.22018	0.77982
ZJ304	Caulobacter_487784	0.9	0.220196	0.779804
Adlercreutzia_404257	Pradoshia	0.9	0.22022	0.77978
UMGS1994	RUG13038	0.9	0.220229	0.779771
CAG-267	UBA1436	0.9	0.220281	0.779719
Reyranella	Corynebacterium	0.9	0.220485	0.779515
UBA3789	Methanobrevibacter_A	0.9	0.220486	0.779514
Duncaniella	CAG-710	0.9	0.220581	0.779419
Nanosyncoccus	CACXMZ01	0.9	0.220664	0.779336
Arthrobacter_B	CAG-793	0.9	0.220664	0.779336
Eubacterium_R	Shuttleworthia	0.9	0.220748	0.779252
Nitrosocosmicus	Eubacterium_R	0.9	0.220749	0.779251
Adlercreutzia_404218	CAG-710	0.9	0.220774	0.779226
Marseille-P2935	UBA2658	0.9	0.220827	0.779173
Agathobacter_164117	CAG-914	0.9	0.22085	0.77915
UBA3789	CAG-793	0.9	0.22085	0.77915
UMGS1994	Methylobacterium	0.9	0.220918	0.779082
Eubacterium_R	CAG-269	0.9	0.22092	0.77908
Methylobacterium	Akkermansia	0.9	0.22102	0.77898
UBA4285	Bariatricus	0.9	0.221048	0.778952
Bariatricus	Eubacterium_R	0.9	0.221048	0.778952
Devosia_A_502124	Saccharofermentans	0.9	0.221151	0.778849
Paraeggerthella	Coprococcus_A_187866	0.9	0.221205	0.778795
UBA3789	Romboutsia_B	0.9	0.221323	0.778677
Enterousia	RUG12783	0.9	0.221446	0.778554
Scybalousia	Duncaniella	0.9	0.221563	0.778437
CACXMZ01	Clostridium_N_143832	0.9	0.221753	0.778247
Agathobacter_164117	Soleaferrea	0.9	0.221816	0.778184
Nitrosocosmicus	RUG13038	0.9	0.221869	0.778131
Arthrobacter_B	Turicibacter	0.9	0.221963	0.778037
Peribacillus_301373	CAG-793	0.9	0.22197	0.77803
Akkermansia	Methanobrevibacter_A	0.9	0.221979	0.778021
RUG410	Copromorpha	0.9	0.222016	0.777984
Anaerobutyricum	Pradoshia	0.9	0.222032	0.777968
Streptococcus	QAMM01	0.9	0.222059	0.777941
Turicibacter	UBA2730	0.9	0.222073	0.777927
Devosia_A_502124	FD2005	0.9	0.222077	0.777923
Olsenella_H_405128	Anaerobutyricum	0.9	0.222099	0.777901
CACXMZ01	Frigoribacterium	0.9	0.222119	0.777881
43-108	Soleaferrea	0.9	0.222126	0.777874
CAG-710	QAMH01	0.9	0.222196	0.777804
Methylobacterium	Eubacterium_I	0.9	0.222356	0.777644
UBA1066	Akkermansia	0.9	0.222404	0.777596
RUG721	Bariatricus	0.9	0.222449	0.777551
Adlercreutzia_404218	Methanobrevibacter_A	0.9	0.222805	0.777195
Anaerosacchariphilus	Mobilisporobacter	0.9	0.222912	0.777088
Aureimonas_A_501548	Coprococcus_A_187866	0.9	0.223022	0.776978
Slackia_A	RUG410	0.9	0.223036	0.776964
BICA1-8	CAG-273	0.9	0.223103	0.776897
RUG410	Pradoshia	0.9	0.223163	0.776837
Paraeggerthella	RUG521	0.9	0.223185	0.776815
Turicibacter	Peribacillus_301373	0.9	0.22324	0.77676
Bulleidia	Shuttleworthia	0.9	0.223305	0.776695
RUG13615	UBA2730	0.9	0.223537	0.776463
Mailhella	Gallalistipes	0.9	0.223654	0.776346
Marvinbryantia	CAG-793	0.9	0.223654	0.776346
Reyranella	Bradyrhizobium	0.9	0.223674	0.776326
Pradoshia	CAG-269	0.9	0.223689	0.776311
Nanosyncoccus	BICA1-8	0.9	0.22379	0.77621
Paraeggerthella	Hornefia	0.9	0.223793	0.776207
Bulleidia	Methylobacterium	0.9	0.223805	0.776195
Berryella	Coprococcus_A_187866	0.9	0.223855	0.776145
Shuttleworthia	Christensenella	0.9	0.223888	0.776112
Berryella	UMGS1449	0.9	0.223895	0.776105
Adlercreutzia_404218	Coprococcus_A_187866	0.9	0.223904	0.776096
Slackia_A	BICA1-8	0.9	0.224045	0.775955
Mogibacterium	UBA2730	0.9	0.224047	0.775953
Adlercreutzia_404257	RUG705	0.9	0.224174	0.775826
Anaerotignum_189125	UBA1436	0.9	0.224219	0.775781
UBA4285	RUG12438	0.9	0.224222	0.775778
Fimiplasma	Acetanaerobacterium	0.9	0.224257	0.775743
Nitrosocosmicus	UMGS1994	0.9	0.224287	0.775713
Paraeggerthella	JC017	0.9	0.224437	0.775563
Parafannyhessea	RUG521	0.9	0.224439	0.775561
Akkermansia	Romboutsia_B	0.9	0.224472	0.775528
UBA1066	Adlercreutzia_404218	0.9	0.224563	0.775437
Pradoshia	Romboutsia_B	0.9	0.224683	0.775317
UBA3789	Devosia_A_502124	0.9	0.224748	0.775252
Duncaniella	Methanobrevibacter_A	0.9	0.224756	0.775244
Adlercreutzia_404257	Clostridium_N_143832	0.9	0.224769	0.775231
CAG-269	Eubacterium_T	0.9	0.224785	0.775215
Aureimonas_A_501548	Shuttleworthia	0.9	0.224829	0.775171
CACXMZ01	QAMH01	0.9	0.2249	0.7751
UBA4285	CAG-269	0.9	0.224901	0.775099
Adlercreutzia_404257	RUG12438	0.9	0.224947	0.775053
UBA2813	CAG-475	0.9	0.224988	0.775012
Nanosyncoccus	RUG410	0.9	0.225025	0.774975
Hornefia	UMGS1449	0.9	0.225043	0.774957
Devosia_A_502124	Eubacterium_R	0.9	0.225109	0.774891
Paraeggerthella	Eubacterium_T	0.9	0.225139	0.774861
Nitrosocosmicus	Duncaniella	0.9	0.225146	0.774854
RUG13615	RUG12438	0.9	0.225168	0.774832
Emergencia	UBA6985	0.9	0.225192	0.774808
Nanosyncoccus	Thermophilibacter	0.9	0.225252	0.774748
Choladousia	Pradoshia	0.9	0.225352	0.774648
Bulleidia	Bariatricus	0.9	0.225447	0.774553
Methylobacterium	Eubacterium_R	0.9	0.225473	0.774527
Slackia_A	Acinetobacter	0.9	0.225708	0.774292
RUG705	Eubacterium_T	0.9	0.225714	0.774286
Ruminiclostridium_E	Bacteroides_H	0.9	0.225777	0.774223
Methylobacterium	UBA2730	0.9	0.225808	0.774192
Anaerobutyricum	RUG721	0.9	0.22583	0.77417
Scybalousia	Saccharofermentans	0.9	0.225992	0.774008
Coprosoma	Aureimonas_A_501548	0.9	0.226021	0.773979
Scybalousia	Christensenella	0.9	0.226064	0.773936
Olsenella_H_405128	CACXMZ01	0.9	0.226127	0.773873
Suipraeoptans	CAG-269	0.9	0.226226	0.773774
Berryella	CAG-302	0.9	0.226244	0.773756
Choladousia	Duncaniella	0.9	0.226418	0.773582
Choladousia	BX12	0.9	0.226531	0.773469
Methylobacterium	Berryella	0.9	0.226647	0.773353
UBA1066	BX12	0.9	0.226736	0.773264
Anaerobutyricum	UMGS1994	0.9	0.226802	0.773198
Suipraeoptans	Bariatricus	0.9	0.226807	0.773193
CACXMZ01	CAG-273	0.9	0.226894	0.773106
Turicibacter	QAMH01	0.9	0.226997	0.773003
Turicibacter	Devosia_A_502124	0.9	0.227003	0.772997
Aureimonas_A_501548	CAG-710	0.9	0.227069	0.772931
Clostridium_N_143832	Thermophilibacter	0.9	0.227144	0.772856
Fimenecus	Butyricicoccus_A_77030	0.9	0.227188	0.772812
BICA1-8	CAG-1427	0.9	0.227291	0.772709
Methylobacterium	Pradoshia	0.9	0.227334	0.772666
RUG13038	Eubacterium_R	0.9	0.227344	0.772656
Phascolarctobacterium_A	Gallalistipes	0.9	0.227361	0.772639
UBA4285	Scybalousia	0.9	0.227363	0.772637
Coprococcus_A_187866	Saccharofermentans	0.9	0.227372	0.772628
Shuttleworthia	RUG521	0.9	0.227398	0.772602
Slackia_A	Anaerobutyricum	0.9	0.227438	0.772562
Mailhella	Alistipes_A_871400	0.9	0.227534	0.772466
CAG-273	Eubacterium_T	0.9	0.227539	0.772461
RUG13038	Berryella	0.9	0.227678	0.772322
Marvinbryantia	Turicibacter	0.9	0.227746	0.772254
DSXL01	Methanobrevibacter_A	0.9	0.227787	0.772213
UBA636	UBA2730	0.9	0.227807	0.772193
CACXMZ01	Bariatricus	0.9	0.227949	0.772051
Paraeggerthella	Eubacterium_I	0.9	0.228014	0.771986
VUNI01	UBA1413	0.9	0.228106	0.771894
Longicatena	CAG-267	0.9	0.228116	0.771884
Clostridium_N_143832	CAG-302	0.9	0.228171	0.771829
CAG-269	FD2005	0.9	0.22834	0.77166
Frigoribacterium	Methanobrevibacter_D_1148	0.9	0.228356	0.771644
BX12	Romboutsia_B	0.9	0.228402	0.771598
BX12	CAG-302	0.9	0.228415	0.771585
Thermophilibacter	CAG-710	0.9	0.228464	0.771536
Mogibacterium	BICA1-8	0.9	0.228543	0.771457
Methylobacterium	FD2005	0.9	0.228581	0.771419
Choladousia	RUG521	0.9	0.228633	0.771367
Ruminococcus_F	Paludicola	0.9	0.228661	0.771339
CAG-605	UBA71	0.9	0.228796	0.771204
Coprococcus_A_187866	Bariatricus	0.9	0.228816	0.771184
RUG721	RUG13038	0.9	0.229018	0.770982
Hornefia	RUG12438	0.9	0.229029	0.770971
CAG-417	Fimenecus	0.9	0.229073	0.770927
Paraeggerthella	RUG13077	-0.9	0.973682	0.0263181
