# Supplementary material for: Functional relevance of seasonal variations in the gut microbiota of the Critically Endangered Hangul (Cervus hanglu hanglu)
Source: Research Square preprint supplement (doi:10.21203/rs.3.rs-6628029/v1), 2025-05-16
Supplement: Supplementary file 4 [file 9ce8cfdf1b5d8857eb8d5b1c.xlsx]

## Sheet: Sample details
Table S1 Details of hangul samples collected in Dachigam National park.
SampleID	Location	Elevation (m)	Season
JH01SP	N34°07’03.76” E74°56’59.48”	1851	Spring
JH02SP	N34°06’57.10” E74°57’04.38”	1871	Spring
JH03SP	N34°06’42.16” E74°58’10.45”	1919	Spring
JH04SP	N34°06’27.87” E74°58’05.83”	1961	Spring
JH08SP	N34°07’19.69” E74°56’38.08”	2121	Spring
JH09SP	N34°07’35.25” E74°57’03.32”	1949	Spring
JH10SP	N34°07’36.56” E74°57’05.08”	1962	Spring
JH11SP	N34°07’02.85” E74°57’41.70”	1958	Spring
JH12SP	N34°07’01.38” E74°57’48.83”	1999	Spring
JH13SP	N34°07’11.47” E74°59’04.91”	2014	Spring
JH14SP	N34°07’12.22” E74°59’01.12”	2040	Spring
JH15SP	N34°08’31.82” E74°56’32.01”	2202	Spring
JH01S	N34°06’50.63” E74°57’01.81”	1888	Summer
JH02S	N34°06’39.01” E74°56’54.20”	1954	Summer
JH03S	N34°06’37.44” E74°58’08.36”	1927	Summer
JH04S	N34°06’21.40” E74°57’56.93”	2006	Summer
JH05S	N34°07’35.36” E74°55’10.55”	2177	Summer
JH06S	N34°07’22.61” E74°55’08.54”	2284	Summer
JH07S	N34°06’57.59” E74°55’46.61”	2304	Summer
JH08S	N34°07’01.23” E74°55’32.48”	2536	Summer
JH09S	N34°07’26.36” E74°56’45.40”	1843	Summer
JH10S	N34°07’26.58” E74°56’49.13”	1860	Summer
JH11S	N34°07’18.06” E74°57’04.48”	1890	Summer
JH12S	N34°07’15.97” E74°57’11.04”	1900	Summer
JH13S	N34°06’59.37” E74°58’25.27”	1924	Summer
JH14S	N34°07’02.37” E74°58’32.87”	1939	Summer
JH15S	N34°09’07.78” E74°56’33.10”	2025	Summer
JH16S	N34°08’58.05” E74°56’31.20”	2175	Summer
JH17S	N34°08’26.96” E74°56’35.03”	2092	Summer
JH18S	N34°08’26.11” E74°56’34.11”	2077	Summer
JH19S	N34°06’53.19” E74°58’17.10”	1928	Summer
JH20S	N34°06’47.62.” E74°57’48.33”	1907	Summer
JH04A	N34°06’30.02” E74°58’07.14”	1952	Autumn
JH07A	N34°06’58.11” E74°55’59.05”	2124	Autumn
JH08A	N34°06’56.60” E74°55’52.07”	2233	Autumn
JH09A	N34°07’27.42” E74°56’49.13”	1876	Autumn
JH10A	N34°07’30.49” E74°56’54.09”	1905	Autumn
JH12A	N34°07’14.26” E74°57’28.64”	1969	Autumn
JH17A	N34°08’25.11” E74°56’33.51”	2059	Autumn
JH19A	N34°07’15.44” E74°56’45.50”	1843	Autumn
JH20A	N34°07’31.25” E74°56’23.46”	1832	Autumn
JH01W	N34°07’19.69” E74°56’38.08”	1819	Winter
JH02W	N34°07’13.36” E74°56’47.95”	1832	Winter
JH03W	N34°06’44.44” E74°58’06.09”	1908	Winter
JH04W	N34°06’34.58” E74°58’07.77”	1939	Winter
JH05W	N34°08’45.27” E74°55’07.86”	1761	Winter
JH06W	N34°08’26.59” E74°55’08.19”	1834	Winter
JH07W	N34°07’13.81” E74°56’18.09”	1949	Winter
JH08W	N34°06’56.92” E74°55’57.67”	2167	Winter
JH09W	N34°07’32.65” E74°56’56.83”	1919	Winter
JH11W	N34°07’09.99” E74°57’30.97”	1968	Winter
JH12W	N34°07’06.06” E74°57’37.19”	1961	Winter
JH13W	N34°07’06.74” E74°59’00.32”	1981	Winter
JH14W	N34°07’12.29” E74°59’06.46”	2001	Winter
JH15W	N34°08’47.03” E74°56’35.41”	2166	Winter
JH16W	N34°08’31.85” E74°56’31.40”	2187	Winter
JH17W	N34°08’19.83” E74°56’21.72”	1933	Winter
JH18W	N34°08’16.12” E74°56’16.14”	1884	Winter
JH19W	N34°08’00.61” E74°56’02.27”	1786	Winter
JH20W	N34°08’02.05” E74°56’02.20”	1784	Winter
