# Supplementary material for: Functional relevance of seasonal variations in the gut microbiota of the Critically Endangered Hangul (Cervus hanglu hanglu)
Source: Research Square preprint supplement (doi:10.21203/rs.3.rs-6628029/v1), 2025-05-16
Supplement: Supplementary file 5 [file e77cfe7d0a45364e0d3d76af.xlsx]

## Sheet: Differential taxa
Table S3 Differential/ discriminatory taxa (at genus level) amongst all seasonal pairs.
Summer-Spring									Autumn-Spring									Winter-Spring									Autumn-Summer									Winter-Summer									Autumn-Winter
taxaname	baseMean	log2FoldChange	lfcSE	stat	pvalue	padj			taxaname	baseMean	log2FoldChange	lfcSE	stat	pvalue	padj			taxaname	baseMean	log2FoldChange	lfcSE	stat	pvalue	padj			taxaname	baseMean	log2FoldChange	lfcSE	stat	pvalue	padj			taxaname	baseMean	log2FoldChange	lfcSE	stat	pvalue	padj			taxaname	baseMean	log2FoldChange	lfcSE	stat
Fusobacterium_A	454.699	26.1651	0.861568	30.3692	1.40335e-202	6.75011e-200			Fusobacterium_A	454.699	25.8498	0.961301	26.8904	2.84353e-159	1.33077e-156			Fusobacterium_A	454.699	26.2162	0.866059	30.2707	2.78421e-201	1.45614e-198			Mogibacterium	1153.33	-4.39903	0.583595	-7.53781	4.77917e-14	3.61624e-12			Neobacillus	183.172	-28.0419	1.48822	-18.8426	3.38184e-79	5.73785e-77			Neobacillus	183.172	27.2171	1.84509	14.7511
Fusobacterium_B	207.254	25.1325	0.843513	29.795	4.53293e-195	1.09017e-192			Fusobacterium_B	207.254	24.2829	0.938394	25.8771	1.20623e-147	2.82258e-145			Fusobacterium_B	207.254	25.0914	0.847727	29.5984	1.56634e-192	4.09598e-190			Copromorpha	443.072	-4.5276	0.694439	-6.5198	7.03998e-11	2.83156e-09			Solibacillus	1373.93	-7.41952	0.761912	-9.73803	2.07547e-22	1.50917e-20			DSXL01	1059.62	-4.54606	0.500684	-9.07971
Sutterella	122.03	24.3559	0.858052	28.3851	3.09116e-177	3.71712e-175			Sutterella	122.03	23.8557	0.957727	24.9087	5.98688e-137	7.00465e-135			Sutterella	122.03	24.4315	0.862416	28.3291	1.51538e-176	2.64182e-174			Adlercreutzia_404199	268.817	-5.23775	0.804494	-6.51062	7.48429e-11	2.83156e-09			Bacillus_AD	2780.64	-6.43898	0.689421	-9.33969	9.66179e-21	6.14732e-19			Methanobrevibacter_A	12151.2	-4.5775	0.52594	-8.70345
Collinsella	159.392	7.08809	0.803908	8.81704	1.17523e-18	2.69185e-17			Mogibacterium	1153.33	-5.72483	0.639608	-8.95054	3.53754e-19	1.18255e-17			Neobacillus	183.172	-23.6265	1.69434	-13.9444	3.4031e-44	2.22478e-42			BX12	490.035	-5.19751	0.818687	-6.3486	2.1729e-10	7.58842e-09			Phoenicibacter	171.058	6.69034	0.841702	7.94858	1.88659e-15	8.00228e-14			Solibacillus	1373.93	8.16918	0.960038	8.50922
Bacillus_AD	2780.64	4.45862	0.784937	5.68022	1.34518e-08	2.02609e-07			Bulleidia	624.529	-4.17398	0.545148	-7.6566	1.9092e-14	5.25592e-13			Collinsella	159.392	5.9679	0.811101	7.35778	1.87e-13	4.65719e-12			Methanobrevibacter_A	12151.2	-3.28117	0.521714	-6.2892	3.19098e-10	1.00079e-08			CAG-964	133.576	-9.0232	1.19047	-7.5795	3.46892e-14	1.17712e-12			Raoultibacter	170.231	-9.95372	1.18248	-8.41766
Clostridium_T	261.819	3.05563	0.564137	5.41647	6.0786e-08	8.86002e-07			Anaerofilum_73741	137.532	-4.79317	0.633894	-7.56146	3.98568e-14	9.81735e-13			Borkfalkia	12781.6	-3.00088	0.471094	-6.37002	1.89008e-10	3.80196e-09			Bulleidia	624.529	-2.74376	0.497282	-5.51751	3.43835e-08	8.67229e-07			Aphodousia	2189.27	-3.67682	0.547509	-6.71555	1.87361e-11	5.60979e-10			Methanosphaera	7793.23	-5.12695	0.620011	-8.26912
UBA1427	1462.01	-3.82886	0.724403	-5.28554	1.25336e-07	1.77314e-06			Methanobrevibacter_A	12151.2	-4.32234	0.573051	-7.54268	4.60413e-14	1.07737e-12			Agathobacter_164117	5166.81	2.37219	0.374969	6.32636	2.51015e-10	4.86225e-09			Raoultibacter	170.231	-6.32679	1.17736	-5.37373	7.71253e-08	1.75074e-06			Pelethenecus	808.995	-3.48878	0.522774	-6.67359	2.49615e-11	6.68707e-10			Copromorpha	443.072	-5.65619	0.69957	-8.08523
Turicibacter	1263.88	-4.0047	0.760804	-5.26377	1.41129e-07	1.93951e-06			Parafannyhessea	120.838	-6.62034	0.881952	-7.50646	6.07478e-14	1.35381e-12			UBA1259	3505.98	-3.0722	0.492167	-6.24219	4.31495e-10	8.05971e-09			Parafannyhessea	120.838	-4.14042	0.814346	-5.08435	3.68894e-07	7.95617e-06			Pradoshia	1879.8	-5.06448	0.782867	-6.46915	9.85571e-11	2.38884e-09			Mogibacterium	1153.33	-4.69903	0.588179	-7.98912
Thermophilibacter	283.938	-2.9838	0.579072	-5.15273	2.56719e-07	3.43005e-06			Copromorpha	443.072	-5.54451	0.758822	-7.30674	2.73711e-13	5.56942e-12			CAG-964	133.576	-7.88757	1.34972	-5.84387	5.10019e-09	8.60451e-08			Anaerofilum_73741	137.532	-2.87225	0.583074	-4.92604	8.39108e-07	1.65633e-05			Fimivivens	218.296	2.22598	0.346995	6.41503	1.40792e-10	3.11578e-09			UBA1367	471.18	-5.79377	0.780018	-7.42774
UBA1367	471.18	-3.23851	0.691039	-4.68644	2.77997e-06	3.51885e-05			Thermophilibacter	283.938	-5.15318	0.711288	-7.24485	4.32926e-13	8.44205e-12			Duodenibacillus	1408.05	-4.6696	0.825859	-5.65424	1.56539e-08	2.40793e-07			DSXL01	1059.62	-2.21836	0.49695	-4.46395	8.04632e-06	0.000140501			GWE2-31-10	227.242	-6.48902	1.08126	-6.00136	1.95675e-09	3.98394e-08			Bacillus_AD	2780.64	6.33479	0.870315	7.27873
Frisingicoccus	181.096	2.047	0.439445	4.65815	3.19067e-06	3.93516e-05			Raoultibacter	170.231	-8.74029	1.25744	-6.95087	3.63048e-12	5.85885e-11			Pelethenecus	808.995	-3.26959	0.601447	-5.43621	5.4425e-08	7.69304e-07			Slackia_A	404.912	-2.87219	0.652984	-4.39857	1.08968e-05	0.000183227			Streptococcus	224.5	2.83714	0.47746	5.94215	2.81303e-09	5.50705e-08			Eubacterium_I	526.891	-4.26195	0.58677	-7.2634
Romboutsia_B	4551.61	-2.67632	0.591429	-4.52518	6.03436e-06	7.07933e-05			Collinsella	159.392	6.32226	0.953898	6.62781	3.40697e-11	4.98269e-10			RUG13077	70969.4	-2.13532	0.395766	-5.3954	6.83716e-08	9.41009e-07			Caulobacter_487784	1113.92	3.94179	0.908622	4.33821	1.43647e-05	0.000224882			DSXL01	1059.62	2.32771	0.393328	5.91798	3.25916e-09	5.92469e-08			Anaerofilum_73741	137.532	-3.88273	0.586545	-6.61966
Solibacillus	1373.93	3.50777	0.8632	4.06368	4.8304e-05	0.000540331			UBA1367	471.18	-5.53206	0.847406	-6.52824	6.65491e-11	9.43788e-10			UBA1427	1462.01	-3.88473	0.731485	-5.31075	1.09173e-07	1.46404e-06			RUG13038	475.187	-3.04684	0.705929	-4.31608	1.58827e-05	0.000232604			RUG131	136.265	-3.50341	0.594237	-5.89565	3.7321e-09	6.55048e-08			RUG721	108.788	-7.04938	1.074	-6.56367
Eubacterium_F	148.477	2.67589	0.671385	3.98562	6.7303e-05	0.000688782			DSXL01	1059.62	-3.51449	0.544954	-6.44914	1.12485e-10	1.47204e-09			Eubacterium_J	634.342	-3.32921	0.630909	-5.27684	1.31431e-07	1.63663e-06			RUG721	108.788	-4.58056	1.06823	-4.28799	1.80296e-05	0.000248043			Romboutsia_B	4551.61	3.04288	0.518907	5.86402	4.51795e-09	7.66546e-08			UBA2730	143.596	-7.23163	1.10421	-6.54914
Blautia_A_141781	1482.88	-2.27963	0.5811	-3.92297	8.7465e-05	0.000876472			BX12	490.035	-5.42635	0.896526	-6.05264	1.42491e-09	1.75489e-08			CAG-313	3407.87	-3.11345	0.591141	-5.26685	1.38785e-07	1.68801e-06			CAG-793	125.151	-4.81441	1.16711	-4.12506	3.70633e-05	0.000467409			Eubacterium_G	461.743	3.94256	0.683034	5.77213	7.82757e-09	1.21548e-07			UBA1067	850.233	-4.32511	0.694977	-6.22338
ZJ304	438.091	-3.97266	1.02123	-3.89006	0.00010022	0.000949435			ZJ304	438.091	-7.55343	1.24991	-6.04316	1.51127e-09	1.81353e-08			Onthomonas	151.36	2.12612	0.419883	5.06361	4.11398e-07	4.78136e-06			UBA2730	143.596	-4.26035	1.09755	-3.88167	0.00010374	0.00117744			UBA1367	471.18	3.50022	0.606519	5.771	7.88031e-09	1.21548e-07			Pelethenecus	808.995	4.07877	0.659897	6.18092
Prevotella	5576.35	2.08575	0.540514	3.85882	0.000113934	0.00105389			Adlercreutzia_404199	268.817	-5.19121	0.878834	-5.90693	3.48543e-09	4.07796e-08			PeH17	59121.4	-2.50978	0.500138	-5.01817	5.21664e-07	5.8049e-06			Methanosphaera	7793.23	-2.36957	0.615053	-3.85262	0.000116859	0.001294			Methanosphaera	7793.23	2.75738	0.490391	5.62282	1.87862e-08	2.8124e-07			Adlercreutzia_404199	268.817	-4.94199	0.810609	-6.09664
Parafannyhessea	120.838	-2.47992	0.683286	-3.62941	0.000284075	0.00231593			Bilifractor	510.185	-4.08089	0.692165	-5.89584	3.72787e-09	4.25522e-08			Eubacterium_F	148.477	3.32898	0.677503	4.9136	8.94179e-07	9.16971e-06			Duodenibacillus	1408.05	-3.43248	0.89996	-3.81403	0.000136716	0.00146441			Clostridium_T	261.819	-2.74449	0.494352	-5.55169	2.82922e-08	4.1145e-07			Caulobacter_487784	1113.92	5.58156	0.916368	6.09096
WG-1	111.749	4.74281	1.32495	3.57961	0.000344102	0.00267588			RUG721	108.788	-6.76281	1.1538	-5.86135	4.5911e-09	5.1158e-08			UBA3207	599.135	-2.98447	0.610242	-4.89064	1.0051e-06	1.0109e-05			Ralstonia	113.572	4.14424	1.12649	3.6789	0.000234246	0.0023119			Borkfalkia	12781.6	-2.24512	0.40931	-5.48515	4.13128e-08	5.84117e-07			Thermophilibacter	283.938	-3.94717	0.655103	-6.02527
Eubacterium_G	461.743	-2.78554	0.778302	-3.579	0.000344915	0.00267588			Eubacterium_I	526.891	-3.60314	0.638426	-5.64379	1.66346e-08	1.76931e-07			Caulobacter_487784	1113.92	-4.04527	0.835157	-4.84373	1.27426e-06	1.25743e-05			CACXMZ01	125.043	-4.14716	1.15025	-3.60544	0.00031162	0.00294261			Eubacterium_I	526.891	2.45135	0.460205	5.32665	1.0004e-07	1.34001e-06			BX12	490.035	-4.95657	0.825096	-6.00727
Clostridioides_A	893.766	-3.12111	0.876683	-3.56014	0.000370663	0.00282998			Methanosphaera	7793.23	-3.68953	0.675542	-5.46158	4.71905e-08	4.80112e-07			QALR01	17541.5	-2.47261	0.536301	-4.61049	4.01727e-06	3.75184e-05			Choladousia	421.395	-2.31922	0.652055	-3.55678	0.000375432	0.00327415			UMGS2069	364.865	-2.55231	0.491345	-5.19452	2.05243e-07	2.67869e-06			Borkfalkia	12781.6	3.07666	0.516983	5.95117
SFEB01	829.195	-2.26492	0.661218	-3.42538	0.000613941	0.00446591			Frisingicoccus	181.096	2.86119	0.529657	5.40198	6.59111e-08	6.42633e-07			RUG131	136.265	-3.11949	0.682952	-4.56765	4.93212e-06	4.52544e-05			UBA9715	2418.53	-2.49799	0.703249	-3.55206	0.000382224	0.00327415			WQUU01	451.463	2.32183	0.456689	5.08405	3.6948e-07	4.70163e-06			CACXMZ01	125.043	-6.77875	1.15741	-5.85684
UBA1254	102.896	-2.30525	0.674455	-3.41794	0.000630974	0.00446591			RUG13038	475.187	-4.1725	0.774151	-5.38977	7.05461e-08	6.73788e-07			Azorhizobium	296.006	-4.30394	0.950001	-4.53046	5.88556e-06	5.30715e-05			Adlercreutzia_404257	314.475	-2.72174	0.768085	-3.54355	0.000394786	0.00331912			Duodenibacillus	1408.05	-3.55531	0.71766	-4.95403	7.26931e-07	9.02459e-06			Phoenicibacter	171.058	-6.17918	1.071	-5.76955
Pradoshia	1879.8	2.97088	0.891916	3.33089	0.000865674	0.00586464			CAG-793	125.151	-6.39212	1.27065	-5.0306	4.88956e-07	4.40061e-06			WRAY01	709.426	-2.82165	0.632011	-4.46457	8.02309e-06	6.99346e-05			Azorhizobium	296.006	3.65151	1.03217	3.53771	0.000403617	0.00333167			NK4A144	167.33	6.28716	1.27449	4.93306	8.09497e-07	9.81033e-06			Parafannyhessea	120.838	-4.64667	0.819473	-5.67031
CAG-307	149.974	4.98313	1.52208	3.27389	0.00106077	0.00698948			UBA9715	2418.53	-3.83872	0.772397	-4.96987	6.6997e-07	5.91497e-06			Solibacillus	1373.93	-3.91175	0.875979	-4.46557	7.98559e-06	6.99346e-05			Prevotella	5576.35	-2.02167	0.594226	-3.40219	0.00066849	0.00505824			Turicibacter	1263.88	3.26061	0.667613	4.88399	1.03962e-06	1.20265e-05			Bulleidia	624.529	-2.83726	0.501184	-5.66111
Phoenicibacter	171.058	-3.07739	0.957471	-3.21409	0.00130861	0.00817455			Blautia_A_141781	1482.88	-3.44724	0.702476	-4.90727	9.23531e-07	7.58268e-06			RUG420	388.659	2.14094	0.483631	4.4268	9.56392e-06	8.19989e-05			Bilifractor	510.185	-2.1389	0.63124	-3.38841	0.000702992	0.0052321			Eubacterium_J	634.342	-2.56069	0.548413	-4.66927	3.02271e-06	3.13991e-05			Slackia_A	404.912	-3.67829	0.658084	-5.58939
Ruminococcus_C_59129	176.291	-4.09051	1.28216	-3.19032	0.00142113	0.00865273			CACXMZ01	125.043	-5.9429	1.24995	-4.75451	1.98933e-06	1.52624e-05			GWE2-31-10	227.242	-5.35671	1.24241	-4.31157	1.62103e-05	0.000134571			Thermophilibacter	283.938	-2.16937	0.650808	-3.33336	0.00085805	0.00581425			Raoultibacter	170.231	3.62693	0.782978	4.63222	3.61759e-06	3.6827e-05			Bilifractor	510.185	-3.52476	0.636032	-5.54181
Ruminococcus_B	108.705	2.40396	0.774731	3.10296	0.00191594	0.0112386			Ruminococcus_C_59129	176.291	-7.54217	1.59508	-4.7284	2.26294e-06	1.70816e-05			UMGS2069	364.865	-2.40998	0.565252	-4.26355	2.01201e-05	0.000164419			Clostridium_T	261.819	-2.02654	0.620102	-3.26807	0.00108283	0.00712172			UBA3207	599.135	-2.43868	0.530459	-4.5973	4.28005e-06	4.19232e-05			RUG13077	70969.4	2.38178	0.434317	5.48396
Caulobacter_487784	1113.92	-2.4055	0.82665	-2.90994	0.00361496	0.019759			Eubacterium_F	148.477	3.81875	0.808444	4.72358	2.3173e-06	1.72142e-05			CAG-194	125.971	3.67955	0.876775	4.19669	2.70846e-05	0.000217927			Eubacterium_G	461.743	2.71186	0.855624	3.16945	0.00152728	0.00949845			Psychrobacillus	341.927	-7.71848	1.67897	-4.59716	4.28292e-06	4.19232e-05			NK4A144	167.33	-9.30067	1.69994	-5.47119
Neobacillus	183.172	4.4154	1.6127	2.73789	0.00618349	0.0316411			Duodenibacillus	1408.05	-4.54677	0.988399	-4.60014	4.22216e-06	2.99389e-05			Paramuribaculum	510.112	-2.48099	0.599424	-4.13897	3.48875e-05	0.000272331			ZJ304	438.091	-3.58077	1.14143	-3.1371	0.00170629	0.0102742			Acinetobacter	113.439	-3.17905	0.692201	-4.59267	4.37614e-06	4.20275e-05			Azorhizobium	296.006	5.6556	1.04206	5.42734
Shuttleworthia	404.347	-3.9835	1.45319	-2.74122	0.00612115	0.0316411			Bacillus_AD	2780.64	4.35444	0.947773	4.59439	4.34021e-06	3.03167e-05			Butyribacter	310.906	2.23309	0.543505	4.10868	3.9792e-05	0.000306047			Treponema_D	1400.35	-2.47432	0.80576	-3.07079	0.00213492	0.0121252			Flexilinea	201.487	2.93025	0.639735	4.5804	4.64082e-06	4.3744e-05			Fimivivens	218.296	-2.37764	0.441259	-5.38832
Raoultibacter	170.231	-2.41351	0.89216	-2.70524	0.00682552	0.0328308			Shuttleworthia	404.347	-7.89392	1.77073	-4.458	8.27281e-06	5.53097e-05			Acinetobacter	113.439	-3.21325	0.795483	-4.03937	5.35956e-05	0.000405229			GWE2-31-10	227.242	-4.14436	1.34971	-3.07056	0.00213659	0.0121252			Spyradosoma	204.899	-2.79035	0.617963	-4.51539	6.3199e-06	5.84878e-05			RUG13038	475.187	-3.82742	0.711437	-5.37984
									UBA2730	143.596	-5.29215	1.19173	-4.44074	8.96519e-06	5.90945e-05			RUG350	391.053	-2.15101	0.552127	-3.89586	9.78504e-05	0.000701038			UBA935	120.02	3.74089	1.24696	3.00001	0.00269967	0.014947			WRAY01	709.426	-2.39599	0.549271	-4.36213	1.28802e-05	0.000115018			UBA3207	599.135	3.57774	0.669607	5.34305
									Coprosoma	344.012	-3.5957	0.823002	-4.369	1.24817e-05	8.00196e-05			UBA2253	2926.79	-2.10624	0.54327	-3.87697	0.000105767	0.000747517			UBA1367	471.18	-2.29355	0.774871	-2.95991	0.00307726	0.0165916			UBA1067	850.233	2.35507	0.548154	4.29637	1.73619e-05	0.000152366			MARSEILLE-P3954	136.707	-2.2185	0.432045	-5.13489
									Ventrisoma	304.36	2.54634	0.609444	4.17814	2.93898e-05	0.000183392			Victivallis	608.262	-2.38789	0.620329	-3.84939	0.00011841	0.000825713			Adlercreutzia_404218	261.792	-3.7891	1.4588	-2.59741	0.00939288	0.038767			Falcatimonas	181.854	4.30392	1.04611	4.11421	3.88513e-05	0.000313894			Choladousia	421.395	-3.31666	0.657134	-5.04716
									UBA1427	1462.01	-3.62142	0.875047	-4.13854	3.49518e-05	0.00021523			WQUU01	451.463	2.02047	0.525475	3.84503	0.000120536	0.000829475												CAG-603	326.226	2.06571	0.503004	4.10675	4.01262e-05	0.000319129			CAG-793	125.151	-5.93111	1.17523	-5.04674
									Solibacillus	1373.93	4.25743	1.04225	4.08486	4.41033e-05	0.00026462			SFEB01	829.195	-2.56334	0.66771	-3.83899	0.00012354	0.000839111												Scatoplasma	250.555	-2.81031	0.698506	-4.02331	5.73856e-05	0.000449373			Ralstonia	113.572	5.69243	1.13831	5.00079
									RUG420	388.659	2.26763	0.578244	3.92158	8.79717e-05	0.000496033			Streptococcus	224.5	2.10298	0.548728	3.83246	0.000126868	0.000850669												WG-1	111.749	-4.65096	1.16112	-4.00557	6.18669e-05	0.000477125			Scatoplasma	250.555	4.34234	0.881204	4.92774
									Romboutsia_B	4551.61	-2.67498	0.714367	-3.74455	0.000180715	0.000983424			Phoenicibacter	171.058	3.61295	0.953869	3.78768	0.000152063	0.00100669												UBA7862	188.433	-2.06079	0.539086	-3.82274	0.000131977	0.000946143			PeH17	59121.4	2.68444	0.548856	4.89098
									Turicibacter	1263.88	-3.38919	0.91901	-3.68787	0.000226141	0.00120266			Butyrivibrio_A_180067	180.831	-3.1199	0.838291	-3.72173	0.00019786	0.00129351												UBA2730	143.596	2.97129	0.818311	3.631	0.000282328	0.00194196			Coprosoma	344.012	-3.68085	0.756143	-4.86793
									UBA1413	178.424	-3.95206	1.11957	-3.52999	0.00041558	0.00206906			Adlercreutzia_404257	314.475	2.54075	0.701741	3.62063	0.000293883	0.00178722												Clostridioides_A	893.766	2.73232	0.769245	3.55195	0.000382383	0.00259511			CAG-964	133.576	7.13311	1.47043	4.85103
									Paludicola	597.245	-2.34724	0.669894	-3.50389	0.000458507	0.00225875			Ralstonia	113.572	-3.73102	1.03841	-3.59302	0.000326862	0.0019426												Treponema_D	1400.35	-2.25964	0.642857	-3.51499	0.000439765	0.00290702			Streptococcus	224.5	-2.85443	0.605437	-4.71466
									CAG-194	125.971	3.58698	1.04715	3.42545	0.000613776	0.00299216			UBA1067	850.233	2.23725	0.630891	3.54618	0.000390863	0.00219808												RF16	7813.57	-2.20835	0.632292	-3.4926	0.000478334	0.0030434			Emergencia	315.522	-3.21282	0.683679	-4.69931
									Clostridioides_A	893.766	-3.33952	1.05936	-3.1524	0.00161935	0.00728706			Slackia_A	404.912	2.11319	0.595514	3.54851	0.000387424	0.00219808												RUG721	108.788	2.46882	0.772299	3.19671	0.00139005	0.00737018			Eubacterium_J	634.342	3.22767	0.692386	4.66166
									Butyribacter	310.906	2.01445	0.64996	3.09934	0.00193955	0.00842221			Scatoplasma	250.555	-2.82026	0.803405	-3.51039	0.000447458	0.00246337												Massilioclostridium	167.179	-2.60452	0.832514	-3.1285	0.00175703	0.00885476			Romboutsia_B	4551.61	-3.04154	0.655589	-4.63941
									Choladousia	421.395	-2.21739	0.715581	-3.09872	0.00194359	0.00842221			Psychrobacillus	341.927	-6.69799	1.93019	-3.47013	0.000520213	0.00283408												CAG-475	531.139	-2.10483	0.686356	-3.06667	0.00216455	0.0102968			Adlercreutzia_404257	314.475	-3.53742	0.774113	-4.56965
									UBA1254	102.896	-2.3415	0.817798	-2.86318	0.00419416	0.0169213			ZJ304	438.091	-3.3856	1.03101	-3.28375	0.00102434	0.00530426												CACXMZ01	125.043	2.63159	0.863449	3.04777	0.00230545	0.0108655			Ruminococcus_C_59129	176.291	-6.53789	1.47205	-4.44135
									Methanobrevibacter_D_1148	163.145	-3.18289	1.12162	-2.83776	0.00454313	0.0180185			CAG-475	531.139	-2.47043	0.789819	-3.12784	0.00176094	0.00877113												Ruminococcus_C_59129	176.291	3.08623	1.12543	2.74227	0.00610156	0.0260983			CAG-710	554.792	-2.22337	0.505447	-4.39882
									Lachnospira	746.796	2.01631	0.723117	2.78836	0.00529757	0.0203218			NK4A144	167.33	4.19182	1.46046	2.8702	0.00410215	0.0179228																					Anaeroplasma	1197.89	2.80494	0.639289	4.38759
									NK4A144	167.33	-5.10885	1.83733	-2.78058	0.00542612	0.0206457			UBA1413	178.424	-2.67772	0.932176	-2.87254	0.00407181	0.0179228																					Paludicola	597.245	-2.68756	0.615023	-4.36986
									UBA1067	850.233	-2.08786	0.757041	-2.75792	0.00581707	0.0218189			Shuttleworthia	404.347	-3.84454	1.46735	-2.62005	0.00879161	0.0340594																					Frisingicoccus	181.096	2.11172	0.484794	4.3559
									Zag111	228.784	-2.40054	0.945457	-2.53903	0.0111161	0.0376981			Adlercreutzia_404218	261.792	3.469	1.33557	2.5974	0.00939327	0.035859																					QALR01	17541.5	2.34758	0.588545	3.98879
																																													Acinetobacter	113.439	3.44453	0.872818	3.94645
																																													Fimenecus	2124.37	2.16268	0.551517	3.92133
																																													Aphodousia	2189.27	2.70283	0.691538	3.90844
																																													Flexilinea	201.487	-3.1474	0.811031	-3.88075
																																													CAG-313	3407.87	2.50173	0.648747	3.85625
																																													UBA9715	2418.53	-2.68928	0.708944	-3.79336
																																													UBA1259	3505.98	2.03734	0.540162	3.77172
																																													WRAY01	709.426	2.61146	0.693655	3.76478
																																													Pradoshia	1879.8	3.62018	0.988721	3.66147
																																													Blautia_A_141781	1482.88	-2.36353	0.644812	-3.66545
																																													ZJ304	438.091	-4.16784	1.15019	-3.62361
																																													UMGS2069	364.865	2.18393	0.620596	3.51909
																																													RUG131	136.265	2.59521	0.750271	3.45903
																																													Massilioclostridium	167.179	3.36606	1.05093	3.20294
																																													Turicibacter	1263.88	-2.6451	0.843483	-3.13592
																																													DTU089	1232.58	-2.37141	0.777825	-3.04877
																																													Clostridioides_A	893.766	-2.95073	0.972318	-3.03473
																																													Adlercreutzia_404218	261.792	-4.46116	1.47049	-3.03379
																																													VUNI01	283.284	3.15321	1.19266	2.64384
																																													CAG-475	531.139	2.22331	0.866875	2.56474
																																													Methanobrevibacter_D_1148	163.145	-2.62197	1.03037	-2.54467
																																													Shuttleworthia	404.347	-4.04938	1.62798	-2.48737
																																													WG-1	111.749	3.45129	1.46565	2.35479
[truncated: 2 more columns]
