# Supplementary material for: Functional relevance of seasonal variations in the gut microbiota of the Critically Endangered Hangul (Cervus hanglu hanglu)
Source: Research Square preprint supplement (doi:10.21203/rs.3.rs-6628029/v1), 2025-05-16
Supplement: Supplementary file 6 [file ed5e9812238f966d9369a2c3.xlsx]

## Sheet: Bleeded ASV Table
Table S2 The final list of 23055 Amplicon Sequence Variants (ASVs) obtained after filtering out ASVs with low abundance
ASVs	JH01S	JH01SP	JH01W	JH02S	JH02SP	JH02W	JH03S	JH03SP	JH03W	JH04A	JH04S	JH04SP	JH04W	JH05S	JH05W	JH06S	JH06W	JH07A	JH07S	JH07W	JH08A	JH08S	JH08SP	JH08W	JH09A	JH09S	JH09SP	JH09W	JH10A	JH10S	JH10SP	JH11S	JH11SP	JH11W	JH12A	JH12S	JH12SP	JH12W	JH13S	JH13SP	JH13W	JH14S	JH14SP	JH14W	JH15S	JH15SP	JH15W	JH16S	JH16W
6e3d8e93a6047763fdcea7f9a8fd8361	0	0	0	0	0	0	0	0	0	0	0	0	0	0	0	0	0	0	0	0	0	0	0	0	0	0	0	0	0	0	0	0	0	0	0	0	0	0	0	0	0	0	0	0	0	0	0	0	0
676d51fed48a0f38d92e38568187295f	0	0	0	0	0	0	0	0	0	0	0	0	0	0	0	0	0	0	0	0	0	0	0	0	0	0	0	0	0	0	0	0	0	0	0	0	0	0	0	0	0	0	0	0	0	0	0	0	0
af958b48d34ac03851bf429b499db0d0	0	0	0	0	0	0	0	0	0	0	0	0	0	0	0	0	0	16	0	0	0	0	0	0	0	0	0	0	0	0	0	0	0	0	0	0	0	0	0	0	0	0	0	0	0	0	0	0	0
a60ca61f1282cba6af1f72740ea58638	0	0	0	0	0	0	0	0	0	0	0	0	0	0	0	0	0	0	0	0	0	0	0	0	0	0	0	0	0	0	0	0	0	0	0	0	0	0	0	0	0	0	0	0	0	0	0	0	0
cea3098c19e2798c99f39ced2a71b67e	0	0	0	0	0	0	0	0	0	0	0	0	0	0	0	0	0	0	0	0	0	0	0	0	0	0	0	0	0	0	0	37	0	0	0	0	0	0	0	0	0	0	0	0	0	0	0	0	0
e912c937654a19f11823ea00deacd027	0	0	0	0	0	0	0	0	0	0	0	0	0	0	0	0	0	0	0	0	0	0	0	0	0	0	0	0	0	0	0	0	0	0	0	0	0	0	0	0	0	0	0	0	0	0	0	0	0
7f83a64af082e4fef8f36411c96198bc	0	0	0	0	0	0	0	0	0	0	0	0	0	0	0	0	0	0	0	0	0	0	0	0	0	0	0	0	0	0	0	0	16	0	0	0	0	0	0	0	0	0	0	0	0	0	0	0	0
d0aaba6a3544a89ec8aa991fb0f086b9	0	0	0	0	0	0	0	0	0	0	0	0	0	0	0	0	0	0	0	0	0	0	0	0	0	0	62	0	0	0	0	0	0	0	0	0	0	0	0	0	0	0	0	0	0	0	0	0	0
f1a93513c3ec532d87921734b2f5446f	0	0	16	0	0	0	0	0	0	0	0	0	0	0	0	0	0	0	0	0	15	0	0	0	0	0	0	0	0	10	0	0	151	0	0	0	0	0	0	0	0	0	0	0	0	0	0	0	0
e1cc521fa5c62246494e26c17ddd9448	0	0	0	0	0	0	0	0	0	0	0	0	0	0	0	0	0	0	0	0	0	0	0	0	0	0	0	30	0	0	0	0	0	0	0	0	0	0	0	0	0	0	0	0	0	0	0	0	0
f81d2cbfb0338ea51abfaf95f17e469b	0	0	0	0	0	0	0	0	0	0	0	0	0	0	0	0	0	0	0	0	0	0	0	0	0	0	0	0	0	0	0	0	0	0	0	0	0	0	19	0	0	0	0	0	0	0	0	0	0
5edf1aa496215986c62d0c687b461857	0	48	0	0	37	0	0	22	0	0	0	0	0	0	0	0	0	0	0	0	0	0	0	0	0	0	0	0	0	0	0	0	0	0	0	0	0	0	0	0	0	0	0	0	0	0	0	0	0
b37312dbc852ace5194141e5722767f4	0	0	0	0	0	0	0	0	0	0	0	0	0	0	0	0	0	0	0	0	0	0	0	0	0	0	0	0	0	0	0	0	0	0	0	0	0	0	0	0	0	0	0	0	0	0	0	0	0
8a659f909864af32375a8a277edf4d74	0	0	0	0	0	0	0	0	0	0	0	0	0	0	0	0	0	0	0	0	0	0	0	0	0	0	0	0	0	0	0	0	17	0	0	0	0	0	0	0	0	0	0	0	0	0	0	0	0
b2e2d3701ed5b7b376892874e8814a37	0	14	0	0	0	33	0	0	0	0	25	0	0	0	0	0	0	0	0	93	0	0	0	0	0	0	0	2	0	153	0	0	0	0	0	9	0	0	0	146	0	0	0	0	0	0	0	30	0
c7d6239114b285f22ece9821b64aa764	0	0	0	0	0	26	0	0	0	0	0	0	0	0	0	0	0	0	0	0	0	0	0	0	0	0	0	14	0	0	0	0	0	0	0	0	0	0	0	0	0	0	0	0	0	0	0	0	0
2e4c2ba724bf3f789907d3d7c0df1d33	0	0	0	0	0	6	0	0	0	0	0	0	0	0	0	0	0	0	0	12	0	0	0	65	0	0	0	0	0	0	0	0	0	0	0	0	0	0	0	0	0	0	0	0	0	0	0	0	0
4feb5fbfe6ddcd908e4283bbc64b0d8e	0	0	233	25	0	29	0	0	0	0	0	0	44	28	16	0	0	0	0	0	0	0	0	0	107	0	0	17	0	0	0	0	155	622	0	0	0	99	0	0	75	0	0	0	0	0	104	0	66
9c8e54b9c268ef06b169a78da4fcec08	0	0	0	0	0	0	0	0	0	0	0	0	0	0	0	0	0	0	0	0	0	0	0	0	0	0	0	0	0	0	0	0	0	0	0	0	0	0	0	0	0	0	0	0	0	0	0	0	0
6c3d807c7df02512b541481ee6ac50e4	0	0	46	0	0	0	0	0	0	0	0	0	0	0	0	0	0	0	0	0	0	0	0	0	0	0	0	0	0	0	0	0	0	0	0	0	0	0	0	0	0	0	0	0	0	0	0	0	0
24852b130b960c0498978ffcba508d19	0	0	0	0	0	0	0	0	0	0	0	0	0	0	0	0	0	0	0	0	0	0	0	0	0	0	0	0	0	0	0	0	0	0	0	0	0	0	0	0	0	0	0	0	0	0	0	35	0
505aaa68ffdf69a88d68ec1bc130c117	0	0	0	0	0	0	0	0	0	0	0	0	0	0	0	0	0	0	0	0	0	0	0	0	0	0	0	0	0	0	0	125	0	0	0	0	0	0	0	0	0	0	0	0	0	0	0	0	0
df206867041fae43913ebd53de26b059	0	0	0	0	0	0	0	0	0	0	0	0	0	0	0	0	0	0	0	0	0	0	0	0	0	0	0	0	0	0	0	0	0	0	0	0	48	0	0	5	0	0	0	0	0	0	0	0	0
d0f58970dd309877c69ce57ddf3835f4	0	0	335	23	0	127	72	80	0	57	19	0	0	0	0	10	91	2	20	0	0	32	36	0	0	0	7	0	176	0	23	0	0	38	98	56	1	132	420	0	94	0	0	96	0	108	22	0	0
be2f6f01e8a34e294a33078385d7f13e	0	0	0	0	0	0	0	0	0	0	0	0	0	0	0	0	0	0	0	0	0	0	0	0	0	0	0	0	0	0	0	0	122	0	0	0	0	0	0	0	0	0	0	0	0	0	0	0	0
5563517aff4a71bfc39b5164f8eb8c72	0	0	0	0	0	0	0	0	0	0	0	0	0	0	0	0	0	0	0	0	0	0	0	0	0	0	0	0	0	0	0	0	0	0	0	0	0	0	0	0	0	0	0	0	0	0	0	0	0
dc5d5131344e1f801b5f07307df061f2	0	82	96	0	108	105	0	536	27	0	19	0	200	0	28	7	77	0	0	233	0	0	188	267	0	0	563	693	0	0	112	0	409	417	0	0	93	20	22	49	89	0	0	524	0	131	41	0	26
4bb35d0a3a87c919e4392172e58080be	0	0	0	0	0	0	0	0	0	0	0	0	0	0	0	0	0	0	0	0	0	0	0	0	0	0	0	0	0	0	0	0	0	0	0	0	0	0	0	0	0	0	0	33	0	0	0	0	0
411dbed5095be7b2e8562dc3b0caba39	0	0	0	0	0	0	0	0	0	0	0	0	0	0	0	0	0	0	0	43	0	0	0	0	0	0	0	0	0	0	0	0	0	0	0	0	0	0	0	0	0	0	0	0	0	0	0	0	0
7e6e1127249fdfe04c8f069614162274	0	0	0	0	0	0	0	0	0	0	0	0	0	0	0	0	0	0	0	0	0	0	0	0	0	0	0	0	0	0	0	0	36	0	0	0	0	0	0	0	0	0	0	0	0	0	0	0	0
2d23474f364e0c14cc4f50254c6e9bb1	0	0	0	0	0	0	0	0	0	0	0	0	0	0	0	0	0	0	0	0	0	0	0	0	0	0	0	0	0	0	0	0	0	0	0	0	0	0	0	0	0	0	0	0	0	0	0	0	0
39e98824644f03658445fe5ede601eab	0	0	0	0	0	0	0	0	0	0	0	0	0	0	0	0	0	0	0	0	0	0	0	0	0	0	0	0	0	0	0	0	0	0	0	0	0	0	0	0	0	17	0	0	0	0	0	0	0
74ff74cc92007cd3935e13c212410085	0	0	0	0	267	0	0	0	0	0	0	0	0	0	0	0	0	0	0	0	0	0	0	0	0	0	0	0	0	0	0	0	0	0	0	0	0	0	0	0	0	0	0	0	0	0	0	0	0
1804501bd31be812eb87ed00e2430104	0	0	0	0	0	0	0	0	0	0	0	0	0	0	0	0	0	0	0	0	0	0	0	0	0	0	0	0	0	0	0	0	0	0	0	0	0	0	0	0	0	0	0	0	0	0	0	0	0
a891cd6a60c7fdb9d2bdfaf432315936	0	0	0	0	0	0	0	133	0	0	0	0	0	0	2737	0	175	0	0	0	0	0	468	0	0	0	0	0	0	0	0	0	0	1244	0	0	0	427	0	153	430	0	0	0	0	0	0	0	0
3c92405364028841a1769f39925effd5	0	0	27	0	0	0	0	0	0	0	0	194	0	0	0	0	0	0	0	0	0	0	0	0	0	0	0	0	0	0	0	0	0	142	0	0	0	0	0	0	0	0	0	0	0	0	138	0	0
4d7e246e0e571c73750e7bdbba8a9bde	8	0	0	0	0	0	0	0	0	0	0	0	0	0	16	0	0	0	0	0	0	0	0	0	6	0	0	21	0	0	0	0	67	0	0	0	47	0	0	21	0	0	0	0	0	0	0	0	0
f4fafae051293d0edcbf2196a33d32d5	0	0	393	0	0	0	0	0	0	214	0	0	0	0	0	0	0	0	61	0	133	0	0	0	0	0	349	0	356	61	292	0	0	33	303	0	0	0	115	0	0	408	0	0	322	105	0	0	0
49633c7ff5485f51d5f56cadcdacf855	0	0	34	0	0	0	0	0	0	0	0	0	0	0	0	0	0	0	0	0	0	0	0	0	0	0	0	0	0	0	0	0	0	0	0	0	0	0	0	0	0	0	0	0	0	0	0	0	0
ec8cc0e51162b815e2c5204d63a6fc52	38	16	31	17	26	25	53	0	187	0	73	0	91	20	88	14	22	0	272	34	0	13	32	54	26	0	0	289	0	129	0	41	574	0	0	64	130	187	12	117	142	28	21	96	13	5	39	8	63
e2c7cf8de91c1db7744e3aca76fedbb1	0	0	0	89	0	0	0	196	0	0	0	73	423	107	0	0	0	0	45	0	0	94	0	0	67	149	0	0	0	196	0	0	0	0	0	70	0	24	0	146	0	0	0	0	0	526	0	0	0
1330b4ddd14f1a10cdefb52cbca231c3	0	0	0	0	0	0	0	0	0	0	0	0	33	0	0	0	0	32	0	0	0	0	0	0	0	0	0	0	0	0	0	58	0	0	0	0	0	0	0	0	0	0	0	0	0	0	0	0	0
ffcd4c1d5c40466445cc6bedcc517e9a	0	0	0	0	0	0	0	0	0	0	0	0	0	0	0	0	0	0	0	0	0	0	0	0	0	0	0	0	0	0	0	0	0	0	0	0	0	0	0	0	0	0	0	0	0	66	0	0	0
bc139fc00a2b29f81f40088223587fd5	0	0	0	0	0	0	0	0	0	0	0	0	0	0	0	0	0	0	0	0	104	0	0	0	0	0	0	0	0	0	0	0	0	0	0	0	0	0	0	0	0	0	0	0	0	0	0	0	0
d8b86950a8001da2548007242f06ac73	83	56	0	0	0	131	41	93	0	0	239	0	0	0	0	0	0	118	0	0	0	0	0	0	0	0	0	0	0	0	46	125	0	116	0	0	0	0	311	0	0	1118	0	0	352	0	0	55	0
6787dc280625b8ec4c0caf0aac161733	0	0	0	0	0	0	0	0	0	0	0	0	0	0	0	0	0	0	0	0	0	0	0	0	0	0	0	0	0	12	0	0	0	0	0	0	0	0	0	0	0	0	0	0	0	0	0	0	0
7b3ce32e24c08f3a4f75ecc21929aec3	0	0	0	0	0	0	0	0	0	0	0	0	0	0	0	0	0	0	0	0	0	0	0	0	0	0	0	0	0	0	0	0	0	0	0	0	0	0	0	0	0	0	66	0	0	0	0	0	0
78f095f83b96428be1864fb89f8f1fb0	0	0	0	0	0	0	0	0	0	0	0	0	0	0	0	0	0	958	0	0	0	0	0	0	0	0	0	0	0	0	0	0	0	0	0	0	0	0	0	0	0	0	0	0	0	0	0	0	0
ba3a11171066e86d9024c087f9f59a61	0	0	0	0	0	0	0	0	0	0	0	0	0	0	0	0	0	0	0	0	0	0	0	0	0	0	0	16	0	0	0	0	0	0	0	0	0	0	0	0	0	0	0	0	0	0	0	0	0
187fd529ed702d56bd09268134b914bd	0	0	0	0	0	0	0	0	43	0	0	0	0	0	0	0	0	0	0	0	0	0	26	0	0	0	0	0	0	0	0	0	0	0	0	0	0	0	0	0	0	0	0	0	0	0	0	0	0
c9e6d50f2a5d3dad04637d16e96ec4c8	0	48	0	351	52	5	25	0	0	159	13	0	0	0	33	27	436	235	48	13	155	279	268	202	18	0	21	0	379	6	46	0	0	0	305	13	0	9	48	51	11	0	97	0	8	0	0	0	0
0c3eb4f03145e48a1fd5472ec7adb8d5	0	0	0	0	0	0	0	0	0	0	0	0	0	0	0	0	0	0	0	0	0	0	0	0	0	0	0	0	0	0	0	0	0	0	0	0	0	0	0	0	0	0	0	0	0	0	36	0	0
6be65f388f51795136fd6d7f47c4e953	0	0	0	0	0	0	0	0	0	0	0	0	0	0	0	0	0	0	0	0	0	0	0	0	0	0	0	0	0	0	0	0	0	0	19	0	0	0	0	0	0	0	0	0	0	0	0	0	0
b07af34d6f43945aeafaa6a3800aff26	53	15	0	47	18	0	0	0	12	0	13	0	24	17	12	0	0	36	19	15	0	36	0	18	44	17	0	0	174	33	0	16	0	24	26	120	105	0	0	74	0	22	0	0	0	0	0	36	0
c003a08d54a2be5d4df27e212b0c601c	0	0	0	0	0	0	0	65	0	18	0	0	110	0	0	0	55	0	39	0	0	0	178	0	0	0	0	160	0	0	0	0	0	0	29	33	0	258	0	0	278	0	0	0	0	24	0	0	33
66de8a62a7491ab14c0442d7333ca0aa	0	0	0	0	0	0	0	0	0	0	0	0	0	0	0	0	0	0	0	0	0	0	0	0	0	0	0	0	0	0	0	0	0	0	0	0	0	0	0	0	0	0	0	0	0	0	0	0	0
a01373935701587fad1d55ee3a6439b7	0	0	0	130	0	0	0	0	0	0	0	0	0	44	0	43	0	0	537	0	0	97	47	0	373	34	0	0	0	71	0	0	33	0	0	0	0	83	28	90	52	59	0	0	49	0	0	0	0
b05b1b288b129c2c673789fcf9d8118b	0	0	0	0	0	0	16	0	0	0	0	0	0	0	0	0	0	0	0	0	0	0	0	0	0	0	0	0	0	0	0	0	0	0	0	4	0	34	0	0	45	0	0	0	0	0	0	0	0
dc78266cf5834ec5899b49c60dc97563	0	0	0	0	0	0	0	0	0	0	0	0	0	0	0	0	0	0	0	0	0	0	0	0	0	0	0	0	0	0	0	0	0	0	0	0	0	0	0	0	0	0	0	0	48	0	0	0	0
61ab48cf7c7af38bba038c29de1536cb	0	0	0	0	0	0	0	0	0	0	0	0	0	0	0	0	0	0	0	0	0	0	0	0	0	0	0	0	0	0	0	0	0	0	0	0	0	0	0	0	0	0	0	0	0	0	0	0	0
69040d11a58b8edb0a6f89f77e605a07	0	0	0	0	0	0	0	0	0	0	0	0	0	0	0	0	0	0	0	0	0	0	0	0	0	0	0	0	0	0	0	0	0	0	0	0	0	0	0	0	0	0	0	0	0	0	0	0	0
42a6b61910f2825ecce85356398c3b09	0	0	28	0	0	82	0	0	0	0	0	45	0	0	38	0	23	0	0	79	0	0	0	216	0	0	0	229	0	0	0	0	0	102	0	0	0	205	0	0	367	0	0	85	0	0	55	0	0
aef1dbb465e28243fb3eb2c5df423b15	0	0	0	0	0	0	0	0	0	0	0	0	0	0	0	0	0	0	0	0	0	0	0	0	0	0	0	0	0	0	0	0	16	0	0	0	0	0	0	0	0	0	0	0	0	0	0	0	0
a2b9dc2bec4dbc7c10d25bd4c163e6f2	0	0	0	0	0	0	0	0	0	0	0	362	0	0	0	0	0	0	0	0	0	0	35	622	64	0	0	0	99	0	0	0	0	0	66	0	0	2086	0	0	2167	0	0	0	0	0	0	0	0
b22c6e3a33d85ab2010ed98f572ffa68	0	0	0	0	0	0	0	0	0	0	0	0	0	0	0	0	1365	0	0	0	0	0	0	0	0	0	0	0	0	0	0	0	0	0	0	0	0	0	0	0	0	0	0	0	0	0	0	0	0
514605ffdecae5231ede28f891058efc	0	0	0	0	0	0	0	0	0	0	0	0	0	0	0	0	0	0	0	0	0	0	0	0	0	0	0	0	0	0	0	0	0	0	0	0	0	0	0	0	0	0	43	0	0	0	0	0	0
d08218d4e6b10ac3d7338f9814e8d317	0	0	0	0	0	0	0	0	0	0	0	0	0	0	0	0	0	0	0	0	0	0	0	0	0	0	0	0	0	0	0	0	0	0	22	0	0	0	0	0	0	0	0	0	0	0	0	0	0
96be9425802658e4e6a65b9a008756ad	0	0	0	0	0	0	0	0	0	0	0	0	0	0	0	0	0	0	0	0	0	0	0	0	0	0	0	59	0	0	0	0	0	0	0	0	0	0	0	0	0	0	0	0	0	0	0	0	0
a2d0a2758e033dad59e54451303a3581	0	0	0	0	0	0	0	0	0	0	0	0	0	0	0	32	0	0	0	0	0	0	0	0	0	0	0	0	0	0	0	0	0	0	0	0	0	0	0	0	0	0	0	0	0	0	0	0	0
e264e76ed9b914a05fc650fdad9d16cc	0	0	0	0	0	0	0	0	0	0	0	0	0	0	0	0	0	0	0	22	0	0	0	0	0	0	0	0	0	0	0	0	0	0	0	0	0	0	0	0	0	0	0	0	0	0	0	0	0
a7dd944c2c18a3026060b12c8ee07c76	0	0	0	0	0	0	0	0	0	0	0	0	0	0	0	0	0	0	0	0	0	0	0	0	0	0	0	0	0	0	0	0	0	0	0	0	0	0	0	0	0	0	0	0	0	0	41	0	0
d24798fe03a51293879e98676e8075bf	0	0	0	0	0	0	0	0	0	0	0	0	0	0	0	0	0	0	0	0	0	0	0	0	0	0	0	0	0	0	0	0	0	0	0	0	0	0	0	0	0	0	50	0	0	0	0	0	0
b0f4c2ec3604c0ba739cc97f2625a99b	8	0	7	0	0	32	0	14	29	0	0	0	0	0	19	0	20	0	0	25	0	0	0	47	0	0	0	70	0	0	0	0	80	9	0	0	55	0	0	0	12	0	0	0	0	0	0	0	0
59c8ea4a39476efab94464653ed7d856	847	191	134	137	160	515	95	110	411	40	105	0	54	133	62	50	54	54	256	65	0	149	77	46	240	205	1112	0	300	0	380	448	57	167	150	89	501	433	89	178	530	421	0	243	234	0	157	0	317
cc49282b0eb5613bd37b632c8d15a390	0	199	0	0	215	0	653	0	0	0	0	0	28	0	0	0	0	33	0	0	0	0	0	0	0	0	0	0	0	0	0	0	0	0	0	74	520	10	18	67	8	0	0	0	0	0	0	0	0
ccc5648862649540abd4276f5ed607f0	0	0	53	0	0	0	0	113	0	0	0	0	0	0	0	0	0	0	0	126	0	0	0	0	0	0	0	0	0	0	0	0	0	0	0	0	0	179	0	0	112	0	0	0	0	0	0	0	0
63586055a0ce944da10c128ab013604c	0	0	0	0	0	0	113	0	0	0	0	0	0	0	0	0	0	0	0	0	94	0	73	0	0	21	0	0	0	0	0	0	0	0	0	29	0	0	0	0	0	0	32	190	0	29	34	0	0
783f0b5163535d3fd743c00656adf53d	0	0	0	0	0	0	0	0	0	0	0	0	0	0	0	0	0	0	0	0	0	0	0	96	0	0	0	0	0	0	0	0	0	0	0	0	0	0	0	0	0	0	0	0	0	0	0	0	0
20793dbd00d3fc47fdc69881086e8af6	0	6	7	0	0	36	0	2	0	0	6	0	2	0	1	0	14	0	0	26	0	0	0	16	0	0	4	3	0	3	6	0	1	11	0	0	22	0	0	16	0	0	0	2	11	0	0	0	0
5a11f2b5df2fc5b2d9b1bb43756c1b0b	0	0	0	0	0	0	0	0	0	0	0	0	0	0	0	0	0	0	0	0	0	0	0	0	0	0	0	0	0	0	0	0	0	0	0	0	0	0	0	0	0	0	281	0	0	0	0	0	0
1bcb37af3c0c6906e35b51070038f8dd	0	0	0	0	0	0	0	0	0	0	0	0	0	0	0	0	0	0	0	0	0	0	0	0	0	0	0	0	0	0	0	0	0	0	0	0	0	0	0	0	0	0	0	0	0	19	0	0	0
65a8748a03cd0ce9cce1732cef89872f	0	0	0	0	0	13	21	24	30	0	0	29	15	0	0	0	22	15	21	17	14	12	0	0	25	0	0	32	0	22	0	32	0	26	0	0	71	0	0	57	0	32	24	34	27	54	46	0	37
0f7ce66d27e5fbfa2dc4a8566ec9ce6d	0	0	0	0	0	0	0	23	0	0	0	0	0	0	0	0	0	0	0	0	0	0	0	0	0	0	0	0	0	0	0	0	0	0	0	0	0	0	0	0	0	0	0	0	0	0	0	0	0
200b8bb81ddce1d695a0f9672599793a	0	0	0	0	0	0	0	0	0	0	0	0	0	0	0	0	0	0	0	0	0	0	0	0	0	0	0	0	0	0	0	0	0	0	0	0	0	0	0	0	0	0	0	0	0	0	0	0	0
90cb3d2bc1ec457c39eefb8291437b46	0	0	0	0	0	0	0	0	0	0	0	0	0	0	0	0	0	0	0	0	0	0	0	0	0	0	0	0	0	0	0	0	0	0	0	0	0	0	0	0	0	0	0	0	0	0	0	0	0
a71e037788ed07b20739f8b82815e5de	0	0	0	0	0	0	0	0	0	0	0	0	0	0	0	0	0	0	0	0	0	0	0	0	0	0	0	0	0	0	0	0	0	0	0	0	0	0	0	0	0	0	0	0	0	0	14	0	0
70090c166d1ccc74ce658464c2b42d52	0	0	0	0	0	0	0	0	0	0	0	0	0	0	0	0	0	0	0	0	0	0	0	0	0	0	0	0	0	0	0	0	0	0	0	0	0	0	0	0	0	0	0	0	0	0	0	0	0
6ab0724b58911bb1d3bd513e4f2269f9	0	0	0	0	0	0	0	0	0	0	0	0	0	0	0	0	0	0	0	0	0	0	171	0	0	0	0	0	0	0	0	0	0	0	0	0	0	0	0	0	0	0	0	0	0	0	0	0	0
d39f6f04917d0e045f22694994dae1e0	0	0	0	245	0	0	287	0	0	195	328	0	0	0	0	68	0	0	88	0	0	147	0	0	241	0	0	0	431	0	0	108	0	0	320	55	0	0	163	475	0	27	0	0	18	0	0	82	0
993237913462586cec263f7d45487417	0	0	0	0	0	0	0	0	0	0	0	0	0	0	0	0	0	0	0	0	0	0	0	0	0	0	0	0	0	43	0	0	195	0	0	0	0	0	0	0	0	0	45	0	0	0	0	0	0
a084315924f9fe5305ad5f94e80a74c4	0	0	0	0	0	0	0	0	0	0	0	0	0	0	0	0	0	0	0	0	0	0	0	0	0	0	0	0	0	0	0	0	0	0	0	0	0	0	39	0	0	0	0	0	0	0	0	0	0
e2d1576a8ab4cd9fc1dc813c856e6414	0	0	0	0	0	0	0	0	0	0	0	0	0	0	0	0	0	0	0	0	0	0	0	0	0	0	0	0	0	0	0	0	0	0	0	0	0	0	0	0	0	0	0	0	0	17	0	0	0
91d3fd52a3879823b186974d6d155f3d	107	15444	596	1651	16943	311	660	4167	0	1503	898	630	0	1194	147	495	1134	2164	50	291	0	1006	605	1330	2330	938	4429	50	2292	1178	2624	575	77	98	2488	674	3406	1415	5208	4304	881	769	3478	174	523	2496	0	5043	126
0fef59753fad3f76ed032d72f8c5f624	0	0	0	0	0	0	0	0	0	0	0	0	0	0	0	0	0	0	0	0	0	0	0	0	0	0	0	0	0	0	0	0	0	0	0	0	39	0	0	0	0	0	0	0	0	0	0	0	0
842dae8ac8093a853416adb2514436ae	0	0	0	0	0	0	0	28	0	0	0	0	0	0	0	0	0	0	0	0	0	0	0	0	0	0	0	0	0	0	0	0	0	0	0	0	0	0	0	0	0	0	0	0	0	0	0	0	0
747f69c3ecc4cf998e683cf51a9809f5	0	0	0	0	0	0	0	0	0	0	0	0	0	0	0	0	0	0	0	0	0	0	0	0	0	0	0	0	1657	0	0	0	0	0	0	0	0	0	0	0	0	0	0	0	0	0	0	0	0
f255e53a8c12f12aa0aa4e686933dfca	0	0	0	0	0	0	0	0	0	0	0	0	0	0	0	0	0	0	0	0	0	0	0	0	0	0	0	0	0	0	0	0	0	56	0	0	0	0	0	0	0	0	0	0	0	0	0	0	0
30c958e1afe1bf3a490f9207ffad8c34	0	0	0	0	0	0	0	0	0	0	0	0	0	0	0	0	0	0	0	0	0	0	0	0	0	0	43	0	0	0	45	0	0	0	0	0	0	0	0	0	0	0	0	0	0	0	0	0	0
b2efaac6c893c88a700cf4d573077574	0	8	0	0	0	0	0	0	0	0	0	0	0	0	0	0	0	0	0	0	0	0	0	0	0	0	0	0	0	0	0	0	5	0	0	0	7	0	17	0	0	0	0	0	0	0	0	0	0
1940d0506e846edb2de97369732b5f9f	0	0	0	37	0	0	59	0	0	42	0	49	61	94	0	56	255	0	11	0	0	16	0	0	21	45	0	0	171	89	0	0	0	55	81	173	96	0	0	513	0	19	0	0	0	57	0	31	0
7d695457d3bd7aa6d22c6adfdc90d8d9	229	886	212	10	1592	18	0	440	32	0	323	0	109	11	245	19	44	27	55	22	0	0	435	14	13	0	4725	191	0	0	2445	0	2128	192	18	18	2326	170	52	615	356	0	6373	1030	0	1829	18	0	18
35c77df4a877a4c6f3df266d2563b33e	33	0	33	85	16	31	34	31	58	36	132	30	30	29	25	103	22	78	42	57	10	52	93	26	104	31	136	0	176	79	131	54	0	82	95	60	70	72	21	91	71	190	0	106	135	83	87	36	77
e469306da96267de953da3e8966cb805	0	22	0	0	0	0	0	0	0	0	0	0	0	0	0	0	0	0	0	0	0	0	0	0	0	0	0	0	0	0	0	0	0	0	0	0	0	0	0	0	0	0	0	0	0	0	0	0	0
d6545470718ece55858759d2c0ff38a5	0	0	0	0	0	0	0	0	0	0	0	0	0	0	0	0	0	0	0	0	0	0	0	0	0	0	0	0	0	0	0	0	0	0	0	0	0	0	0	0	0	0	0	0	0	0	0	0	16
45d9773fb5517ebcfa965f8cde6dfc1d	0	0	0	0	0	0	0	0	0	0	0	0	0	0	0	0	0	0	0	0	0	0	0	0	0	0	0	12	0	0	0	0	0	0	0	5	0	0	0	0	0	0	0	0	0	0	0	0	0
8e6e19df5b90b25e9766508b3ab0a14d	0	0	0	0	0	0	0	0	0	0	0	0	0	0	0	0	0	0	0	0	0	0	0	0	0	0	0	0	0	0	0	0	0	0	0	0	0	0	0	0	0	0	0	0	0	0	0	0	92
9bc9de9075a157b468234e1862f92489	0	0	18	0	0	0	0	0	0	0	0	0	0	0	0	0	0	0	0	0	0	0	0	0	0	0	0	0	0	0	0	0	0	0	0	0	0	97	0	0	89	0	0	0	0	0	0	0	0
10aff8a8f7da3c62cadf23de564fd41d	0	0	0	0	0	0	0	0	0	0	0	0	0	0	0	0	0	0	0	0	0	0	0	0	0	0	0	0	0	0	0	0	0	0	0	0	0	0	0	989	0	0	0	0	0	0	0	0	0
f70d45a7ed6ee61889662e6ba4d65a1c	297	0	0	38	0	0	0	0	0	0	11	0	0	651	0	0	0	0	31	46	0	28	0	0	0	368	0	0	0	81	0	42	0	0	0	0	72	0	0	0	0	20	0	0	54	0	0	0	0
d25c22cacab11c1f27713e1ecb3c29b3	0	0	0	0	0	0	0	0	0	0	0	0	0	0	0	0	0	0	0	0	0	0	0	0	0	0	0	0	0	0	0	0	0	0	0	0	9	0	0	0	0	0	0	0	0	0	0	0	0
dfb7615180ef8daf7d84e1791824b65c	0	0	0	0	0	0	0	0	0	0	0	0	0	0	0	0	0	0	0	0	0	0	0	0	0	0	0	0	0	0	0	0	0	0	0	0	0	0	0	0	0	0	0	0	0	0	0	0	0
40aa4f4ff2b3898ce5d119d40fa2fd48	0	0	0	0	0	0	0	0	0	0	0	0	0	0	0	0	0	0	0	0	0	0	0	0	0	0	0	0	0	0	0	0	0	0	0	0	0	0	0	0	0	0	0	0	0	0	0	0	0
7cd744e07efb61bc34b3076842e299aa	0	0	0	0	0	0	0	0	0	0	0	0	0	0	0	0	0	0	0	0	0	0	0	0	0	0	0	0	0	0	0	0	0	0	0	0	0	0	0	0	0	0	0	0	0	0	0	0	0
d252fc4512d79bf47b8109db63f586aa	0	0	67	0	0	0	0	0	0	0	0	0	0	0	0	0	0	0	0	0	0	0	13	0	0	0	34	33	0	0	33	0	0	0	0	0	0	54	0	0	69	0	0	102	0	58	0	0	0
6930375e83697695ac88e4698b71fe46	0	0	0	0	0	0	0	0	0	0	0	0	0	0	0	0	0	0	0	0	0	0	0	0	9	0	0	0	11	0	0	0	0	0	9	0	0	0	0	0	0	0	0	0	0	0	0	0	0
edc038d0952ee58db3a84c1d9f4f0a9a	0	0	0	315	0	0	22	0	0	9	0	22	17	0	0	45	0	0	0	0	0	248	0	0	83	0	0	0	0	133	0	0	34	0	24	37	59	0	0	0	0	0	0	0	0	0	0	95	0
2c3dec07c9700cb27b30f511432faedb	0	0	0	0	0	0	0	0	0	0	0	0	0	0	0	0	0	0	0	0	0	0	0	0	0	0	0	0	0	0	0	0	0	0	0	0	0	41	0	0	33	0	0	0	0	0	0	0	0
0d61632270667b984bad88f20e723d16	0	0	0	0	0	0	0	0	0	0	0	0	62	0	0	0	0	0	0	0	0	0	0	0	0	0	0	0	0	0	0	0	0	0	0	0	0	0	0	0	0	0	0	0	0	0	0	0	0
5d3bba3f9caa13da2ae3856230331ed1	0	0	0	0	0	0	0	0	0	0	0	0	0	12	0	0	0	0	0	0	0	0	0	0	0	0	0	0	0	0	0	0	0	0	0	0	0	0	0	0	0	0	0	0	0	0	0	0	0
9a6216d7eab99ba80933bccdea3096ee	0	165	27	37	277	28	0	94	8	44	56	5	0	66	0	70	0	0	49	26	0	30	0	37	30	39	77	0	79	0	112	18	0	7	77	0	239	0	34	218	0	0	0	22	0	228	0	9	0
9f5a82a78eea7842a8cfb4ac492f7fc8	0	0	0	0	0	0	0	31	0	0	0	0	0	0	0	0	0	0	0	0	0	0	0	0	0	0	0	0	0	0	0	0	0	0	0	0	0	0	0	0	0	0	0	0	0	0	0	0	0
c1a061cea7431a8da904ca11d1a0fecc	0	0	0	0	0	0	0	0	0	0	0	0	0	0	0	0	0	0	0	0	0	0	0	0	0	0	0	0	0	0	0	0	0	0	0	0	0	0	0	0	0	0	0	0	0	0	0	0	0
4d99ad032e82fcdf3ee1e26912006880	0	0	0	0	0	0	0	0	0	0	0	59	0	0	0	0	0	0	0	0	0	0	0	0	0	0	0	0	0	0	0	0	0	0	0	0	0	0	0	0	0	0	0	0	0	0	0	0	0
d80d5184b1205aef078d6fce0a08329d	5	0	0	0	0	0	0	0	0	0	11	0	0	0	0	0	0	0	0	0	0	0	0	0	0	0	0	0	0	0	0	0	0	8	0	0	0	0	0	0	0	0	0	0	0	0	0	0	0
e2b3025d139d43eeb02821edd9edb1cb	0	0	0	0	0	0	0	0	0	0	0	0	0	0	0	85	0	0	0	0	0	0	0	0	0	0	0	0	0	0	0	0	0	0	0	0	0	0	0	0	0	0	0	0	0	0	0	0	0
9b47b49630a0a9bc9dea6c04194cad42	0	0	0	0	0	0	0	0	0	0	0	0	0	0	0	0	0	0	0	0	0	0	0	0	0	0	0	0	0	0	0	0	0	0	0	0	0	0	0	0	0	0	0	26	0	0	0	0	0
eb73904009beb9f557b9a8804312fe47	0	0	0	0	0	47	28	0	0	0	20	0	0	0	0	0	18	0	0	0	0	0	0	0	0	0	0	150	0	22	0	0	29	31	0	11	0	127	0	24	89	54	0	0	51	14	0	0	0
7a8e7b838da127e5abcef6d9b671421f	0	0	0	0	0	0	0	0	0	0	0	0	0	0	0	0	0	0	0	0	0	0	0	15	0	0	0	127	13	0	0	0	0	0	2	0	0	0	0	0	0	0	0	0	0	0	0	0	0
ebe4a6f2cd824749b3b4798ec437d4e1	0	0	0	0	0	0	0	0	0	0	0	0	0	0	0	27	0	0	0	0	0	0	0	0	0	0	0	0	0	0	0	0	0	0	0	0	0	0	0	0	0	0	0	0	0	0	0	0	0
92fe4e11358cffbf1e13684e1374f472	33	4121	111	998	4817	446	1566	2979	0	1418	720	3373	126	1450	50	1097	3284	1246	187	218	30	790	1606	1910	608	1292	1170	0	2512	301	690	693	47	154	2027	328	390	52	1704	835	24	156	1464	63	81	4945	74	134	40
2ea9540f0133d644fcb7fc2b6dc128ba	0	0	0	0	0	65	0	61	0	85	0	35	0	0	0	187	0	48	65	0	0	0	0	0	66	0	0	0	165	0	0	0	0	0	228	48	0	0	84	0	0	20	0	0	13	0	0	0	0
a7af0a9bf3d9204eaa0084d6052b6d11	0	22	0	0	24	0	0	10	0	0	0	0	0	0	0	0	12	0	0	0	0	0	0	0	0	0	27	19	0	0	0	0	107	0	0	0	18	0	0	0	0	0	0	12	0	5	0	0	0
312751a606675212581b3400350a8b51	0	0	0	5	0	41	28	0	0	0	0	0	0	0	0	0	0	0	22	0	0	0	0	0	0	0	302	0	0	32	266	0	80	0	0	16	50	0	0	31	0	0	0	0	0	0	0	0	20
f39dd738af12b52f3d2a032a79f7aefb	0	0	0	0	0	0	0	0	0	0	0	0	0	0	0	0	0	0	0	0	0	0	0	0	0	0	24	0	0	0	0	0	0	0	0	0	0	0	0	0	0	0	0	0	0	0	0	0	0
e4dffe2ab978f4e2173e713738d9b717	0	19	0	0	0	0	0	0	0	0	0	0	0	0	0	0	0	0	0	0	0	0	0	0	0	0	0	0	0	0	0	0	0	0	0	0	0	0	0	0	0	0	0	0	0	0	0	0	0
5cc043f81ee6f5301b4579d18bda9082	0	0	0	0	0	0	0	0	0	0	0	0	0	0	0	0	0	0	0	0	0	0	0	0	0	0	0	0	0	0	0	0	0	0	0	0	0	0	0	0	0	0	0	0	0	0	0	0	27
69173a06e610c3a111f961244f4e4d37	0	0	0	0	0	0	0	0	0	0	0	0	0	0	0	0	0	0	0	0	0	0	0	0	0	0	0	0	0	0	0	0	0	0	0	0	0	0	0	0	0	0	0	0	0	0	0	0	0
d8c090de25ad446571d2fdb2c3a976c7	22	0	40	0	0	0	0	0	0	0	0	154	0	0	0	0	598	0	0	0	0	0	379	0	0	0	0	0	0	0	0	0	0	0	0	107	0	0	0	0	0	0	0	0	0	0	0	0	0
195fee0db0178ff189922d8f669c7ff4	0	0	0	0	0	0	0	0	0	0	0	0	0	0	0	0	257	0	0	0	0	0	0	0	0	0	0	0	0	0	0	0	0	0	0	0	0	0	0	0	0	0	0	0	0	0	0	0	0
f0d8b3f7efe29090a2983239c3ef8c42	0	0	149	80	0	0	0	0	0	41	0	0	0	0	0	0	0	0	0	0	0	108	53	0	57	0	0	0	101	0	0	0	0	0	34	0	0	61	0	0	63	0	0	0	0	414	0	0	0
a1a69c94bb3688946eeb378c6c3a7185	0	0	0	0	0	0	0	0	0	0	0	0	0	0	0	0	0	0	0	0	0	0	0	0	0	0	0	0	0	0	0	0	0	0	0	0	0	0	0	0	0	0	0	0	0	0	0	0	0
d900eb33f6b4bc449aab64df16ae18b2	21	0	12	53	0	25	0	0	10	13	16	0	34	16	12	32	58	13	0	0	33	24	0	13	0	19	0	16	0	52	0	9	0	0	0	26	0	35	15	0	12	29	0	55	11	0	0	48	13
6d1cd5ed8ccb5d70fd8020cd25e15ce0	0	0	0	0	0	0	0	0	0	0	0	0	0	0	0	0	0	0	0	0	0	0	110	0	0	0	65	14	0	0	8	0	13	0	0	0	0	0	0	0	0	0	65	0	0	0	18	0	0
2177f3ad9cce91dd5ba58271f4b595c8	0	0	0	0	0	0	0	0	0	0	0	0	0	0	0	0	0	0	0	0	0	0	0	0	0	0	0	0	0	0	0	0	0	0	0	0	0	0	0	0	0	0	0	0	0	0	0	0	0
4b4b62117f5d943ef08d51ea0fd8e1dd	0	0	0	0	0	0	0	0	0	0	0	0	0	0	0	0	0	0	0	0	0	0	0	0	0	0	0	0	0	0	0	0	0	0	0	0	0	0	0	0	0	0	0	0	0	0	0	0	0
7e4738efb0e759bdff42d8f24c6ec224	0	0	23	0	0	57	0	0	31	0	290	16	316	131	14	0	13	11	0	134	19	0	21	0	38	154	0	0	27	0	0	0	25	0	16	0	14	55	0	0	73	66	95	0	13	195	47	0	0
a64efcca6aa1760e9c9f059c46c7b771	0	0	0	0	0	0	0	0	0	0	0	0	0	0	0	0	0	0	0	0	0	0	0	0	0	0	0	0	0	0	0	0	0	0	0	0	0	0	0	0	0	0	0	0	0	0	0	0	0
bbb2d297f5965e31d367ee7d19938a5f	0	0	0	0	0	0	0	0	0	0	0	0	0	0	0	0	0	0	0	0	0	0	0	0	0	0	0	0	0	0	0	0	0	0	0	0	0	0	0	0	0	0	0	0	0	0	0	0	0
05541e541e44e5e5abd823a7d0f52427	0	0	0	0	0	0	0	0	0	195	0	0	0	0	0	0	0	0	0	0	0	0	0	0	0	0	0	0	0	0	0	0	0	0	0	0	0	0	0	0	0	0	0	0	0	0	0	0	0
6503672e01ef5027661f1107a075df40	0	0	0	0	0	0	0	423	0	0	0	0	0	0	0	0	0	0	0	0	0	0	0	0	0	0	0	0	0	0	0	0	0	0	0	0	0	0	0	0	0	0	0	0	0	0	0	0	0
d8656e47c2f617030c980eeecc8400c3	0	0	0	0	0	0	0	0	0	0	0	0	0	0	0	0	0	0	0	0	0	0	0	0	0	0	0	0	0	0	0	0	0	0	0	0	0	0	0	0	0	0	0	0	0	0	0	0	0
d769b1b0ae767be414737df190087a75	23	0	107	21	0	7	13	0	0	0	0	0	9	115	27	0	17	0	4	20	10	12	0	0	0	32	0	99	0	13	0	15	0	3	0	0	0	5	97	0	36	6	0	12	7	0	17	10	0
d5aaee15ce5b6ea9044c0d2e3deaa150	0	0	0	0	0	0	0	0	0	0	0	0	0	0	0	0	0	0	0	0	0	0	0	0	0	0	0	0	0	0	0	0	0	0	0	0	0	0	0	702	0	0	0	0	0	0	0	0	0
fe65d4dffbfe50d252f9abee3b475918	0	0	0	0	0	0	0	0	0	228	0	0	0	0	0	39	0	0	0	43	0	0	100	21	21	0	0	0	518	0	0	0	0	0	383	0	0	0	0	0	0	0	0	0	0	0	18	0	0
d9e96b80c4b12ea2889405cd4e7543a9	0	0	0	0	0	0	0	0	0	0	0	0	0	0	0	0	0	0	0	0	0	0	0	0	0	0	0	0	0	0	0	0	0	0	0	0	0	0	0	0	0	0	0	0	0	210	0	0	0
872bdb3222d2cd1d9af76ad694d3204e	0	0	0	0	0	0	0	0	0	0	0	0	0	0	0	0	0	0	0	0	0	0	0	0	0	0	0	0	82	0	0	0	0	0	0	0	0	0	0	0	0	0	0	0	0	0	0	0	0
1238543632d809929f05993f2c66fc77	0	0	0	354	0	0	0	0	0	0	0	0	0	0	0	0	0	0	0	0	0	0	0	0	0	0	0	0	0	0	0	0	0	0	0	0	0	0	0	0	0	0	0	0	0	0	0	0	0
7cd1dd1788a3b1c1bf1cb5ebdbc3fb88	0	0	0	0	0	0	0	0	0	0	0	0	0	0	0	0	0	0	0	21	0	0	0	0	42	0	0	0	0	0	0	0	0	0	0	0	0	14	0	0	0	0	0	0	0	0	0	0	0
bf498cfaeb096c98a2b15108a88c6f15	0	0	0	0	0	0	0	0	0	26	32	0	0	0	0	0	0	0	0	0	0	0	0	35	0	0	0	0	0	0	0	0	0	0	0	17	0	0	0	0	0	0	0	0	0	0	0	0	26
a85a051305528f0b8df0e58dc4cef415	0	0	0	0	0	0	0	0	0	0	0	0	0	49	0	0	0	0	0	0	0	0	0	0	0	0	0	0	0	0	0	0	0	0	0	0	0	0	0	0	0	0	0	0	0	0	0	0	0
ceabb5a2f1b68af76cd379b4ee19e623	0	0	0	0	0	0	0	0	0	0	0	0	0	0	0	0	0	0	0	0	0	0	0	0	0	0	0	0	0	0	0	0	0	0	0	0	0	0	0	0	0	0	0	0	0	0	0	0	0
da6394eaeecfb904470c76fe47ac4caf	0	0	0	0	0	0	0	0	0	0	0	0	0	0	0	0	0	0	0	0	0	0	0	0	0	0	0	0	0	0	0	0	0	0	0	0	0	0	0	0	0	0	0	0	0	0	0	0	0
c4b4986a48e0c67ca040049da7edd1da	80	0	0	1284	0	696	17	2679	0	731	132	109	0	249	332	119	0	0	1423	0	0	1372	21	202	0	235	4632	0	1677	1325	1719	90	145	147	1286	1641	3799	37	713	94	38	590	172	0	148	0	1405	1080	0
90ca14035ebce5a0bd8acc7f84e7d982	0	0	0	0	0	0	4	0	0	0	0	0	0	0	0	0	0	0	0	0	0	0	0	0	0	0	0	0	0	0	0	0	0	0	0	0	0	0	0	0	0	0	0	0	0	0	0	0	0
0eab324623de709b104cbe2a93a1b4f6	0	0	0	0	0	0	0	0	0	0	0	0	0	0	0	0	0	0	0	0	0	0	0	0	0	0	0	0	0	0	0	0	0	0	0	0	0	0	0	0	0	0	8	0	0	29	0	0	0
5887cbcc59b9208551d7e6c6d1fcb0f1	0	0	0	0	0	0	0	0	0	0	0	0	0	0	0	37	0	0	0	0	0	0	0	0	0	0	0	0	0	0	0	0	0	0	0	0	0	0	0	0	0	0	0	0	0	0	0	0	0
50fc69e37a4610fdf3e4bc83600ec52a	0	0	0	0	0	0	0	0	0	0	0	0	0	0	0	0	0	0	0	0	0	0	0	0	0	0	0	0	0	0	0	33	0	0	0	0	0	0	0	0	0	0	0	0	0	38	0	32	0
11638a90fc720f1801502923a9ecb6df	0	0	0	0	0	0	22	0	0	0	0	0	0	0	0	0	0	0	0	0	0	0	0	0	0	0	0	0	0	0	0	0	0	0	0	21	0	0	0	0	0	0	0	0	0	0	0	0	0
f858262669a615560591cc896b5e2a0b	0	0	0	0	0	0	0	0	0	0	0	0	0	0	0	0	0	0	0	0	0	0	0	33	0	0	0	0	0	0	0	0	0	0	0	0	0	0	0	0	0	0	0	0	0	0	0	0	0
72af2e3a61329cc8bdc671c57cd0f176	0	0	0	0	0	0	0	0	0	0	0	0	0	0	0	0	0	0	0	0	28	0	0	0	20	0	0	0	0	0	0	0	0	0	0	0	0	0	0	0	0	0	0	0	0	0	0	0	0
72fca6f676cbe38fde1b8eae97173a5c	0	0	43	0	0	0	0	0	0	0	0	0	0	0	0	0	0	0	0	0	0	0	0	0	225	0	0	0	0	0	0	0	32	0	0	0	0	33	0	112	14	0	0	0	0	0	0	0	0
09be80d4fe9edfac07a21db4fb1fc31f	0	61	0	0	0	0	0	0	0	0	0	0	0	0	0	0	0	0	0	0	0	0	0	0	0	0	0	0	0	0	0	0	0	0	0	0	0	0	0	0	0	0	0	0	0	0	0	0	0
fe7436668ee4d3848ff2cedcde209e66	0	0	0	0	0	32	0	0	0	0	0	0	0	0	0	0	0	0	0	0	0	0	0	0	0	0	0	0	0	0	0	0	0	0	0	0	0	0	0	0	0	0	0	0	0	0	0	0	0
9db08496fc305ed7f347c01d5fdd8c26	0	0	0	0	0	0	0	0	0	0	0	0	0	0	0	15	0	0	0	0	0	0	0	0	0	0	0	0	0	0	0	0	0	0	0	0	0	0	0	0	0	0	0	0	0	0	0	0	0
33bb78934d2c5096d866760b165e55b2	0	0	0	0	0	10	0	0	0	0	0	0	0	0	0	0	0	0	0	0	0	0	0	0	0	0	0	0	0	0	0	0	0	0	0	0	0	0	0	0	0	0	0	0	0	0	0	0	0
e86fc9ef1ae834105fb2943469b20d83	45	24	7	55	28	26	0	47	0	0	33	0	0	0	106	80	0	0	131	0	16	63	0	0	36	0	64	0	0	17	52	0	15	14	0	0	62	0	0	140	0	50	69	51	79	37	0	29	0
4f63d0f58dee5fc8a7f16355de683952	11	0	0	0	0	0	0	28	0	0	0	0	0	0	0	0	0	0	0	0	0	0	0	0	0	0	0	0	0	0	0	0	21	0	0	0	0	0	0	8	0	0	0	0	0	0	0	0	0
1179e5205a16505f10f457780785ab83	0	0	0	0	0	0	0	0	0	0	0	0	0	0	0	0	0	0	0	0	0	0	0	0	0	0	0	0	0	0	0	0	0	0	0	0	39	0	0	0	0	0	22	0	0	0	0	0	0
bfc87dc95632e475480cf3fae591d4ed	0	0	0	0	0	0	0	0	0	0	0	0	0	0	0	0	0	0	0	0	0	0	0	0	0	0	0	0	0	0	0	0	0	0	0	0	0	0	0	0	0	0	0	0	0	0	0	0	0
4868bf92d8b921ac450dd8d47a7919f0	154	0	0	0	0	12	0	0	0	0	102	0	0	38	0	0	0	6	0	0	0	0	0	0	7	0	14	0	0	54	0	130	122	0	0	71	0	0	0	0	0	123	0	22	96	0	0	28	0
57e62e84abff58d7bf4dc3f4a087af5a	0	0	0	0	0	0	0	0	0	0	0	0	0	0	0	0	0	0	0	0	0	0	0	0	0	0	0	0	0	0	63	0	0	0	0	0	0	0	0	0	0	0	0	0	0	0	0	0	0
c5b770ae5ba0b0265cbb5772c778673c	0	0	0	0	0	0	26	0	0	0	0	0	33	0	0	0	0	0	0	0	0	0	0	0	0	0	0	0	0	0	0	0	0	0	0	17	0	0	0	0	0	0	0	0	0	0	0	0	0
f70fdd93446b23e83b715d8c3d424dc3	0	141	0	0	203	0	33	0	0	106	337	0	0	38	0	20	0	0	0	0	67	0	0	0	0	26	0	0	236	0	0	0	0	0	202	22	0	0	0	36	0	37	75	0	14	53	0	0	0
b7f8c735986e38d50f90673d14710452	0	43	30	0	79	0	0	52	0	0	0	0	0	0	0	0	0	0	0	0	0	0	0	0	0	0	0	0	0	0	0	0	601	0	0	0	44	0	0	20	0	0	0	0	0	0	0	0	0
9d85b44c85aebdc57462c301b36ed270	0	0	0	0	0	0	0	0	0	0	0	0	0	0	0	0	0	0	0	0	0	0	0	0	0	0	0	0	0	0	0	0	0	0	0	0	0	0	0	195	0	0	0	0	0	0	0	0	0
f7cd18315f2a267a608d74024ed1fee7	0	0	0	0	0	0	0	0	0	0	0	0	0	0	0	0	0	0	0	0	0	0	0	0	0	0	0	0	0	0	0	0	0	0	0	0	0	0	0	0	0	0	0	0	0	0	0	0	0
f49da37ac668cde1cb005aabafd61ec9	64	0	0	50	0	0	0	0	0	77	107	0	0	9	0	572	0	0	463	0	0	34	96	0	0	0	25	0	440	25	25	0	0	0	210	89	28	0	62	87	0	171	80	0	230	179	0	54	0
26e2bd5096911e658fa6542743e81e00	0	0	6	0	0	0	0	0	0	0	0	0	0	0	0	0	0	0	2	0	0	1	1	0	1	0	2	0	0	1	0	0	32	0	1	0	0	10	0	0	14	25	0	0	46	0	0	20	0
7dadaaf34784829ab42dd17706bff5d0	0	0	0	0	0	0	0	0	0	0	0	15	0	0	0	0	0	0	0	0	0	0	0	0	0	0	0	0	0	0	0	0	0	0	0	0	0	0	0	0	0	0	0	0	0	0	0	0	0
af732fb8192bffd253e31dddf58a37f4	0	281	35	126	284	46	159	1186	388	0	262	297	0	283	458	93	0	77	170	683	0	111	73	48	321	419	104	0	0	160	51	60	0	10	0	103	14	33	52	4312	11	0	212	0	0	210	255	14	19
f7b44eafd6c9d5c93ee3fc5b653fad14	0	0	0	0	0	0	0	0	0	0	0	0	0	0	0	0	0	0	0	0	0	0	0	0	0	0	0	0	0	0	0	0	0	0	0	0	0	0	0	0	0	0	0	0	0	0	0	0	0
bb8f07d458f643edd962f1b66ff7bf85	0	0	0	0	0	0	0	0	0	0	0	0	0	0	0	0	0	0	0	0	0	0	0	0	0	0	0	0	0	0	0	0	0	0	0	0	0	0	0	0	0	0	0	0	0	0	0	0	0
7d6227cedfd7508ba6fbb89af8b2227c	0	0	0	0	0	0	0	0	0	0	0	0	0	0	0	0	0	0	0	0	0	0	0	114	0	0	0	0	0	0	0	0	0	0	0	0	633	0	0	0	0	0	0	0	0	0	0	0	0
47a45f87602047930cee7a5348b7302a	0	0	0	0	0	0	102	0	0	0	0	0	0	0	0	0	0	0	0	0	0	0	0	0	0	0	0	0	0	0	0	0	0	0	0	0	0	0	0	0	0	0	0	0	0	0	0	0	0
c9324a9342e92e67584dd6160f241c41	0	0	0	0	0	0	0	0	0	0	0	0	0	0	0	0	0	0	0	0	0	0	0	0	0	0	0	0	0	0	0	0	0	67	0	0	0	0	0	0	0	0	0	0	0	0	0	0	0
b22ea60840f8f1cc9d5af374fb099514	0	0	56	37	0	58	0	0	0	0	139	0	0	0	0	0	0	0	0	0	301	33	0	22	76	0	85	0	0	0	81	0	0	0	0	0	48	0	0	61	0	0	0	0	0	0	0	0	0
7601a94422b59bf5516ca562ce2fc50c	0	0	0	0	0	0	0	0	0	0	0	0	0	0	0	0	0	0	0	0	0	0	0	0	0	0	0	0	0	0	0	0	0	0	0	0	0	0	0	0	0	0	0	0	0	0	0	0	0
60aa2b64a2a3e1a2094cf36d4cbe3b3a	0	0	0	25	0	0	55	0	0	0	0	0	0	0	0	0	0	0	0	0	0	0	0	0	0	0	0	0	0	0	0	0	0	0	0	0	0	0	0	0	0	27	28	0	40	0	0	0	0
3a4ae0e51c0a82caaac50d3aaebc2aed	0	0	8	0	0	0	0	0	0	0	0	0	0	0	0	0	0	0	0	0	0	0	0	0	0	0	0	0	0	0	0	0	0	0	0	0	0	0	0	0	0	0	0	0	0	0	0	0	22
ac7dd1b0d2fbe582193e656ad8afb446	0	0	0	0	0	0	0	0	0	0	0	0	0	42	0	0	0	0	75	0	9	0	0	0	0	0	0	0	0	0	0	59	108	0	0	0	124	0	0	0	0	0	0	0	0	56	0	0	0
22daf6d2084d5a877ec250839c01353d	0	0	0	0	0	0	0	0	0	0	0	0	0	0	0	0	0	0	0	0	0	0	0	0	0	0	0	0	0	0	0	0	0	0	0	0	0	0	0	0	0	0	0	0	0	0	0	0	0
f5daf55bf2fbdeabdf57cb8ea4db026c	0	0	0	0	0	0	0	0	0	0	0	0	0	0	0	0	0	0	0	0	0	0	0	0	0	0	0	0	0	0	0	0	0	0	0	0	0	0	0	0	0	0	0	0	0	0	0	0	0
90e2d1ba751c4ffdf46f9c39424205f9	0	0	0	0	0	0	0	0	0	0	0	0	0	0	0	0	0	0	0	0	0	0	0	0	0	0	0	0	0	0	0	0	144	0	0	0	0	0	0	0	0	0	0	0	0	0	0	0	0
2b0f1e296dabe1207ca15840c6766461	0	160	6	148	197	31	0	0	0	0	0	0	0	0	0	20	0	0	0	0	122	118	233	0	0	0	0	0	0	79	0	0	0	31	0	0	0	0	0	131	0	81	0	0	55	157	0	0	9
2f3fe1097d251f04648f41e195811db8	0	0	0	0	0	0	0	0	0	0	0	0	0	0	0	0	0	0	0	0	0	0	0	0	0	0	0	0	0	0	0	0	0	0	0	0	0	0	0	0	0	0	0	0	0	0	0	0	0
cbbbb93beaeae1fde80878462e216265	0	0	0	0	0	0	0	0	0	0	0	0	0	0	0	0	0	0	0	0	0	0	0	0	0	0	0	0	26	0	0	0	0	0	0	0	0	0	0	0	0	0	0	0	0	0	0	0	0
9feb0166bb010aa93726622b4cf6ba7f	0	0	0	0	0	0	0	0	0	0	0	0	0	0	0	0	0	0	0	0	0	0	0	0	0	0	0	0	0	0	0	0	0	0	0	0	0	0	0	0	0	12	0	0	0	0	0	0	0
41a11e22c1c6b636956d7bd1be71560c	0	0	0	0	0	0	0	0	0	0	0	0	0	0	0	0	0	0	0	0	0	0	0	0	0	0	0	0	0	0	0	0	0	0	0	0	0	0	0	0	0	0	0	0	0	0	0	0	0
3c409d4efded60940c4cc7f660774552	0	251	29	68	311	114	44	21	0	0	135	0	0	0	101	0	369	0	0	0	0	75	0	0	40	0	0	0	63	147	53	28	0	57	62	48	25	0	0	136	0	102	0	0	36	0	0	0	0
b260c919cb2751f9c03a247ccb137fde	46	494	0	44	644	0	930	236	17	98	504	0	41	563	0	242	0	42	0	0	0	0	0	0	1018	346	17	0	108	393	24	0	0	0	140	0	65	0	114	0	0	1032	553	0	400	0	233	108	0
8419fdeda9aeba8d0e9e58d6819234c3	0	0	0	0	0	0	0	0	0	0	0	0	0	0	0	0	0	0	0	0	0	0	0	0	0	0	0	0	0	0	0	0	0	0	0	0	0	0	0	0	0	0	0	0	0	0	0	0	0
14f19e324452d5940740dcfa77031a75	0	0	0	0	0	0	0	0	0	0	0	0	0	0	14	0	0	0	0	0	0	0	0	0	0	0	0	0	0	0	0	0	0	0	0	0	0	0	0	0	0	0	0	0	0	0	0	0	0
095a80fa7b54934f52fa070dd3c350ab	0	0	0	0	0	0	0	35	0	0	0	0	0	0	0	0	0	0	0	0	0	0	0	0	0	0	0	0	0	0	0	0	63	0	0	0	0	0	0	0	0	0	0	0	0	0	0	0	0
c50f78548284694aafcd5dc6ef743c99	0	0	0	0	0	0	0	0	0	0	0	0	0	0	0	0	0	0	0	0	0	0	0	0	0	0	0	0	0	0	0	0	0	0	0	0	0	0	0	0	0	0	0	0	0	0	0	0	0
44a510a1f0eb9cd2650a45e54eb34a65	0	0	0	0	0	0	0	0	0	0	0	0	0	0	0	0	0	0	0	0	0	0	0	0	0	0	0	0	0	0	0	0	0	0	0	0	0	0	0	0	0	0	0	0	0	0	0	0	0
d187d46a4b13a1b761e4a22f3d575509	0	625	577	0	661	101	0	675	41	38	0	0	318	0	0	0	73	197	189	0	0	0	0	216	524	0	0	0	67	0	0	0	0	0	47	0	435	0	0	330	0	0	0	0	0	83	120	0	0
7c2125b3e7300a054fda2e77b1b656fa	0	0	0	0	0	0	0	0	0	0	0	0	0	0	0	0	0	0	0	0	0	0	0	0	0	0	0	0	0	0	0	0	0	0	0	0	0	0	0	0	0	0	0	0	0	0	0	0	0
1cf79f82cba122e2f3789cd3b1e5cd1e	0	0	0	0	0	34	0	0	0	0	0	0	0	0	0	0	0	0	0	0	0	0	0	0	0	0	0	0	0	0	0	0	0	0	0	0	0	0	0	0	0	0	0	0	0	0	0	0	0
2ec07f8de883d9880259fb175d1cd6c7	125	341	316	880	371	103	498	4028	77	1073	209	934	0	392	0	370	222	237	135	64	239	625	1490	346	381	317	920	0	1965	691	1078	104	41	144	1494	471	10493	0	274	1207	0	388	273	43	402	611	38	355	116
df06a31f90a74becaef9f82ffc628219	0	114	6	50	136	0	0	35	0	25	15	0	0	35	0	31	0	0	0	0	30	24	0	15	14	11	55	0	143	22	49	30	0	0	70	0	0	0	31	21	0	34	0	6	19	80	0	15	0
48c13b859cc0371409ac71ae18d7d998	0	0	0	0	0	0	0	0	0	0	0	0	0	0	0	0	0	0	0	0	0	0	0	0	0	0	0	0	0	0	0	0	0	0	0	0	0	0	0	0	0	0	0	0	0	0	0	0	0
9514314f57509b4c2a6ec00127fa103e	0	0	0	0	0	0	0	0	0	0	0	0	0	0	0	0	0	0	0	0	0	0	0	0	0	0	0	0	0	0	0	0	0	0	0	0	45	0	0	0	0	0	0	0	0	0	0	0	0
30628a6214071b21b2486baf97668455	0	0	0	0	0	0	0	0	0	0	0	0	0	0	0	0	0	0	0	0	0	0	0	0	0	0	0	0	0	0	0	0	0	0	0	0	1329	0	0	0	0	0	0	0	0	0	0	0	0
af66b36a54b26bb43eea920d1e9ba781	0	0	0	0	0	0	0	0	0	0	0	0	0	0	0	0	0	0	0	0	0	0	0	0	0	0	0	0	0	38	0	0	104	0	0	0	25	0	0	0	0	0	0	0	0	0	0	0	0
9bb276530d60c2d320b7fd8bc8cf8613	0	0	0	0	0	0	0	0	0	0	0	0	0	0	0	27	0	0	0	0	0	0	0	0	0	0	0	0	0	0	0	0	0	0	0	0	0	0	0	0	0	0	0	0	0	0	0	0	0
931d945e008dd481984453df809ff56d	0	0	0	0	0	0	0	0	0	0	0	0	0	0	0	0	0	0	0	0	0	0	0	0	0	0	0	0	0	0	0	0	0	0	0	0	0	0	0	0	0	0	0	0	0	0	0	0	0
21140d8e4278e25231bd56fefa49650a	0	0	0	0	0	0	0	0	0	0	0	0	0	0	0	0	0	0	0	0	0	0	0	0	508	0	0	0	0	0	0	0	0	0	0	0	0	0	0	0	0	0	0	0	0	0	0	0	0
00aa57bf18c1f64d0e986d6b8390441d	0	0	0	0	0	0	0	0	0	0	0	0	0	0	0	0	0	0	0	0	0	0	0	0	0	0	0	0	0	0	0	0	0	0	0	0	0	0	0	0	0	0	0	0	0	0	0	0	0
0640b971f132ea7b58335ce4c459a4ab	0	0	0	0	0	0	0	0	0	0	0	0	0	0	0	0	0	0	0	0	0	0	0	0	0	0	0	0	0	0	0	0	0	0	0	0	0	0	0	0	0	0	0	0	0	0	0	0	0
799c53f0bbac8c819c51fb0d702fad03	0	0	0	0	54	0	0	0	0	0	0	0	0	0	0	0	0	0	0	0	0	0	0	0	0	0	0	0	0	0	0	0	0	0	0	0	0	0	0	0	0	0	0	0	0	0	0	0	0
73aae73c0a145a3311f57f6acc20e1f9	0	0	0	0	0	0	0	0	0	0	0	0	0	0	0	0	0	0	0	0	0	0	0	0	0	0	0	0	0	0	0	0	0	0	0	0	0	0	0	0	0	0	0	0	0	0	0	0	0
f876f98faa91a60399e601c78a0c6ed4	0	0	17	384	0	50	197	64	0	0	434	83	0	246	0	0	0	599	0	0	0	282	468	0	0	180	388	0	0	152	452	759	0	0	0	115	1039	0	89	48	0	214	0	0	123	161	0	0	0
6dfe1ca04a24c86c5f88efa6693a9f5d	0	0	0	0	0	0	0	0	0	0	0	0	0	0	0	0	0	0	0	0	0	0	0	0	0	0	0	0	0	0	0	0	0	0	0	0	0	0	0	0	0	0	0	0	0	0	0	0	90
56a391c547aded05a477a53d5a58ffc8	0	0	0	0	0	0	0	0	0	0	0	0	0	0	0	16	0	0	0	0	0	0	0	0	0	0	0	0	0	0	0	0	0	0	0	0	0	0	0	0	0	0	0	0	0	0	0	0	0
af5e3097981c49d7b460f17dbb990883	0	0	11	0	0	0	0	0	0	0	0	0	0	0	0	0	0	0	0	0	0	0	0	0	0	0	0	0	0	0	0	0	0	0	0	0	0	0	0	0	0	0	0	0	0	0	0	0	0
24b0c7c658ad5c0079beb9e076aa7b20	0	0	0	0	20	0	0	0	0	0	0	0	0	0	0	0	64	0	0	0	0	0	0	0	0	0	0	0	0	0	0	0	0	0	0	0	0	0	0	0	0	0	0	0	0	0	0	0	0
23219668c7ab74fe548fce90e58f0814	0	0	0	0	0	0	0	0	0	0	0	0	0	0	0	0	0	0	0	0	0	0	0	0	81	0	0	0	0	0	0	0	0	0	0	0	0	0	0	0	0	0	0	0	0	0	0	0	0
770b579bf590b252873f04828b978128	0	0	0	0	0	29	0	0	0	0	0	6	0	0	0	0	0	0	0	18	0	0	0	0	0	0	0	0	0	0	0	0	0	0	0	14	0	0	0	34	0	0	0	16	0	0	41	0	0
2f4730a85eac396c2d76491f27cdd4ba	78	380	175	188	400	78	0	183	465	69	0	200	148	521	217	41	245	766	82	202	0	139	345	78	262	270	632	70	370	0	461	0	0	109	128	0	387	141	0	635	153	0	0	735	101	298	895	0	255
fa1c357830c65d8076005302462b4eb9	0	0	0	0	0	0	0	26	0	0	0	0	0	0	0	0	0	0	0	0	0	0	0	0	0	0	132	0	0	0	156	0	0	0	0	0	0	0	0	0	0	0	0	0	0	0	0	0	0
bd5da59502ab943b2273074c6bdda2f2	0	0	0	0	0	0	0	0	0	0	0	0	0	0	0	0	0	0	0	0	0	0	0	0	0	0	0	0	0	0	0	0	86	0	0	0	69	0	0	0	0	0	0	0	0	0	0	0	0
ae5c91de670e6f7b2eed8a87fb910ea9	0	0	0	0	0	0	0	0	15	0	0	0	0	0	0	0	0	0	0	0	0	0	0	0	0	0	0	0	0	0	0	0	0	0	0	0	0	0	0	0	0	0	0	0	0	0	0	0	0
d62423724d08035e037c36118b0cf471	0	0	0	0	0	0	0	0	0	0	0	0	0	0	0	0	0	0	0	0	0	0	0	0	0	0	0	0	0	0	0	0	0	0	0	0	0	0	0	0	0	0	0	0	0	0	11	0	0
e9b7e1cb633767671543920b0bacb779	0	0	0	0	0	0	0	0	0	0	0	0	0	17	0	0	0	0	0	0	0	0	0	0	0	0	0	0	0	0	0	0	0	0	0	0	0	0	0	0	0	0	0	0	0	0	0	0	0
d41b602257794fb77150023b3aff1558	79	22	154	125	18	134	15	29	17	27	92	0	39	0	13	63	0	55	18	62	0	141	35	0	167	0	32	185	41	12	0	0	0	273	34	49	69	36	20	35	20	65	0	55	60	5	10	85	47
ff0d5aef338b3cc63cfe0bd80babdc82	0	0	0	119	0	0	0	64	0	0	0	0	0	0	0	0	0	0	20	0	0	84	0	0	0	0	0	0	0	59	0	0	0	0	0	0	0	0	0	0	0	39	0	0	11	0	0	0	0
4e6567ea733704003fb51b54e0a0c953	0	0	26	0	0	7	0	0	0	0	0	0	0	0	0	0	0	0	0	0	0	0	0	0	0	0	0	0	0	0	0	0	0	0	0	0	0	0	0	0	8	0	0	8	0	0	15	0	8
24134528e6f07bec4208d3699835cf91	0	0	0	0	0	0	0	0	0	0	0	0	0	0	0	0	0	0	0	71	0	0	0	0	0	0	0	0	0	0	0	0	0	0	0	0	0	0	0	0	0	0	0	0	0	0	0	0	0
9978e5107843611a2ebaa1e4b3d3b56f	0	77	0	121	114	0	0	89	0	0	18	0	0	0	0	0	60	0	9	0	0	104	29	42	74	0	121	0	10	74	94	16	0	0	11	0	412	0	10	0	0	132	34	0	118	51	0	25	0
6492f78fabccdb1a086b04086792ca54	0	0	39	0	0	0	0	0	0	0	0	0	0	0	0	0	0	0	0	0	0	0	0	0	0	0	0	0	0	0	0	0	0	0	0	0	0	0	0	0	0	0	0	0	0	0	0	0	0
7ad278d6035a3a3b0939f4763eec18bd	0	0	0	0	0	0	0	0	0	0	0	0	0	0	0	0	0	0	0	0	0	0	0	0	0	0	0	0	0	0	0	0	15	0	0	0	0	0	0	0	0	0	0	0	0	0	0	0	0
bffe5b8725eb082d5de118d14c738443	0	0	0	0	0	0	0	0	0	0	0	0	11	0	0	0	0	0	0	0	0	0	0	0	0	0	0	0	0	0	0	0	0	0	0	0	0	0	0	0	0	0	0	0	0	0	0	0	0
b3b2c414f8b155a51e034965fc77cb44	73	0	0	0	0	0	0	0	0	0	0	0	0	0	0	0	0	0	0	0	0	0	0	0	0	0	0	0	0	0	0	0	0	0	0	0	0	0	0	0	0	0	0	0	0	0	0	0	0
9737f87d8177c9bee60881dce0a6ca1c	0	918	67	95	1071	46	43	135	0	303	82	42	117	183	0	33	342	363	96	0	276	39	802	0	131	211	391	0	581	27	52	84	0	0	428	0	173	70	406	0	50	8	153	10	0	19	56	58	0
30ce688c0ecbd8d541ab91a00cd3ac0b	0	0	0	0	0	0	0	0	0	0	0	0	0	0	0	0	0	0	0	0	0	0	0	0	0	0	0	0	28	0	0	0	0	0	0	0	0	0	0	0	0	0	0	0	0	0	0	0	0
41610b61dd335f4ca1a31e2bbcd1e2fb	42	0	0	0	0	0	0	0	0	0	0	0	0	0	0	0	0	0	0	0	0	0	0	0	0	0	0	0	0	0	0	0	0	0	0	0	0	0	0	0	0	0	0	0	0	0	0	0	0
697e117520da1cbfbdef5549612b3b06	0	0	0	0	0	0	0	0	0	0	0	0	0	0	0	0	0	0	0	0	0	0	0	0	0	0	0	0	0	0	0	0	0	0	0	0	67	0	0	0	0	0	0	0	0	0	0	0	0
b28d8e5f04db6498acaf409d60e113ad	0	0	0	0	0	0	0	0	0	0	0	0	0	0	0	36	0	0	0	0	0	0	0	0	0	0	0	0	0	0	0	0	0	16	0	0	0	0	0	0	0	0	0	0	0	0	0	0	0
572667e5810fb778df712ba7173fcea2	0	0	0	0	0	0	0	0	0	0	0	0	0	0	0	0	0	0	0	0	0	0	0	0	0	0	0	0	0	0	0	0	0	0	0	0	62	0	0	0	0	0	0	0	0	0	0	0	0
6e785fd21740acc2b8038d7acf51316e	0	0	0	0	0	0	0	0	0	0	0	0	0	0	0	0	0	0	0	0	0	0	0	0	0	0	0	0	0	0	0	0	0	0	0	0	0	0	0	0	0	0	0	0	0	0	0	0	0
7fcf18469f4db343f4d82a399ad2f14c	0	0	0	0	0	0	0	0	0	0	0	0	0	0	0	0	0	0	0	0	0	0	0	0	0	0	0	0	0	0	0	0	0	20	0	0	0	0	0	0	0	0	0	0	0	0	0	0	0
4a6f62014e129e4f83ff4c3bd36e3a15	0	0	0	0	0	0	0	0	0	0	0	0	0	0	0	0	0	0	0	0	0	0	0	0	0	0	0	34	0	0	0	0	0	0	0	0	0	0	0	0	0	0	0	0	0	0	0	0	0
56904d72b1af9a9ed91d1dff91d598a8	0	0	25	0	0	15	0	0	10	0	3	0	0	0	21	0	0	0	0	9	0	0	7	0	0	0	0	10	14	0	10	0	0	32	0	0	0	0	0	10	0	0	0	13	0	6	19	0	22
7440fbc1d20e986b0caf7f930a25774d	533	87	505	408	103	1322	225	95	820	0	225	0	416	35	505	0	145	50	171	335	116	599	12	178	14	30	69	1752	0	142	33	215	1706	823	11	1189	403	880	17	611	1203	1255	0	402	303	6	439	195	1079
d70274632a1538a5d4ff169425ed3f90	0	0	0	38	0	0	0	0	0	0	0	0	0	0	0	0	0	0	0	0	0	0	0	0	0	0	0	0	0	0	0	0	0	0	0	0	0	0	0	0	0	0	0	0	0	0	0	0	0
b0b909125ecc54df541418e32e45f359	0	0	0	0	0	0	0	0	0	0	0	0	0	0	0	0	0	0	0	0	0	0	0	0	0	0	0	0	0	0	0	0	0	0	0	0	0	0	0	0	0	0	0	0	0	0	0	0	0
5a5edf1afa18c67fb4e4bbf30e90d861	0	0	12	0	0	0	0	20	0	0	17	0	0	0	0	0	0	0	0	0	11	0	0	237	7	0	0	0	0	0	0	0	253	32	0	0	169	0	0	76	0	0	0	0	0	26	0	0	0
5f07e953b5ec8fba719703632425c8e2	0	0	0	0	0	0	0	0	0	0	0	0	0	0	0	0	0	0	0	0	0	0	133	0	0	0	0	0	0	0	0	0	0	0	0	0	0	0	0	0	0	0	0	0	0	0	0	0	0
a395aacedf6ff52b5c050f6b58bc34a7	0	0	0	0	0	0	0	0	0	0	0	0	0	0	0	0	0	0	0	0	0	0	90	0	0	0	0	0	0	0	0	0	0	23	0	0	0	110	0	0	125	0	0	0	0	0	244	0	0
18fd70c10c56f9e6462d6c903509da2d	0	0	0	0	0	0	0	0	0	0	0	0	0	0	0	0	0	0	0	0	0	0	0	0	0	0	0	0	0	0	0	0	0	0	0	0	0	0	0	0	0	0	0	0	0	0	0	0	0
23fb5ca44b2d90b4ab35ff15cb690dbb	0	0	40	0	0	26	0	57	24	0	16	0	29	0	0	0	30	0	0	22	0	0	0	24	0	0	223	0	0	0	15	0	296	531	0	0	69	0	0	0	50	0	0	0	0	10	91	0	0
3d5b6efc036b67460f074d805b795082	12	2562	333	926	3800	147	5091	546	94	373	860	339	0	121	60	97	759	290	361	734	0	975	837	638	901	120	0	0	894	954	0	462	31	157	638	1658	653	383	503	1309	294	239	37	0	118	440	165	266	359
a8e705e19864d57d4f807939940f82dd	0	0	0	0	0	0	0	0	0	0	0	0	0	0	0	0	0	0	0	0	0	0	0	0	24	0	0	0	0	0	0	0	0	0	0	0	0	0	0	0	0	0	0	0	0	0	0	0	0
37e7ad8afffbddee92c36681e9b08bea	0	0	0	0	0	0	0	0	0	0	0	0	0	0	0	0	40	0	0	0	0	0	0	0	0	0	0	0	0	0	0	0	92	0	0	0	0	0	0	0	0	0	0	0	0	0	0	0	0
6df74404bb03020dd885e3d5bc0358c5	0	0	0	0	0	0	10	0	0	0	0	0	0	0	0	0	0	0	0	0	0	0	0	0	0	0	0	0	0	0	0	0	0	0	0	0	0	0	0	0	0	0	0	0	0	0	0	0	0
2d817bfa425a29404131613b20d1a99d	0	0	0	15	0	0	0	0	0	0	0	0	0	0	0	0	0	0	0	0	0	0	0	0	0	0	0	0	0	0	0	0	0	0	0	0	0	0	0	0	0	0	0	0	0	0	0	0	0
c74bc46a6d411d2d11a51cf28c758cb0	0	0	0	0	0	0	0	0	0	0	0	0	0	0	0	0	0	0	0	0	0	0	25	0	0	0	0	0	0	0	0	0	0	0	0	0	0	0	0	0	0	0	0	0	0	0	0	0	0
64392d515f0a715a43c4223d9f53f190	0	25	0	119	40	0	0	0	24	0	57	0	0	59	0	118	0	0	117	90	56	69	90	22	99	40	74	0	48	24	67	51	0	20	43	51	127	0	18	261	0	100	198	52	109	105	53	142	15
3b606b516ac6eab21a9ce89ea5318aa1	0	0	0	0	0	0	0	0	0	0	0	0	0	0	0	0	0	0	0	0	0	0	0	0	0	0	0	0	0	0	0	0	0	0	0	0	0	0	0	0	0	0	0	0	0	0	0	0	0
39c8b0ffb5b1de3c589955e936b2fe5d	0	73	74	61	49	38	0	28	51	0	0	0	0	53	102	30	16	0	54	88	18	37	0	19	31	47	96	47	19	12	87	29	0	112	28	46	122	0	28	141	0	23	0	81	20	127	34	25	30
9f57909117c21d934fc07382851e0f40	0	0	0	0	0	0	0	0	0	0	0	0	0	0	0	0	0	0	0	0	0	0	0	0	0	0	0	0	0	0	0	0	0	0	0	0	0	0	0	0	0	0	0	0	0	0	0	0	30
da04d3d30cfcc9296df43363e0172bdd	0	0	0	0	0	0	0	0	0	0	0	0	0	48	0	0	0	0	0	0	0	0	0	0	0	56	0	0	0	0	0	0	0	0	0	0	0	0	0	0	0	0	0	0	0	0	0	0	0
1dbb24a4dd626730d1232581bd121095	0	0	0	0	0	0	0	0	0	0	0	0	0	0	0	0	0	0	0	0	0	0	0	0	0	0	0	0	0	0	0	0	0	0	0	0	0	0	0	0	0	0	0	0	0	0	0	0	0
3904ba512386282fcdca6ca28afd8abf	0	0	0	0	0	0	0	0	0	0	0	62	0	0	0	0	0	0	0	0	0	0	0	0	0	0	0	0	0	0	0	0	0	0	0	0	0	0	0	0	0	0	0	0	0	0	0	0	0
5ca494ac272a2036cb3637d485e27325	0	0	0	23	0	0	15	0	60	6	9	19	0	0	0	0	7	0	8	0	0	0	0	0	0	0	0	0	101	14	0	0	0	0	11	13	0	0	0	8	0	0	0	0	0	0	0	0	0
341b53b299fa108a8070698f13fb466a	0	0	0	0	0	0	0	0	0	0	0	0	0	24	0	0	0	0	0	0	0	0	0	0	0	0	0	0	0	0	0	0	0	0	0	0	0	0	0	0	0	0	0	0	0	0	0	0	0
454bd4d48078a155778d21fa40b0d220	0	0	0	0	0	0	0	0	0	0	0	0	0	0	0	0	0	0	0	0	0	0	0	0	0	0	0	0	0	0	0	0	0	0	0	0	0	0	0	0	0	0	0	0	0	0	0	0	0
4e81224aa44362c7704570c912b87361	0	0	0	0	0	0	0	0	0	0	0	31	0	24	0	0	0	0	0	0	0	0	0	0	0	0	0	0	43	24	0	0	0	0	0	0	65	0	15	124	0	0	0	0	0	0	0	0	0
5bcd1cd8cfd3d6bd996d0e87e4a76891	0	0	0	0	0	0	0	0	0	0	0	0	0	0	0	0	0	0	0	0	0	0	0	0	0	0	0	123	0	0	0	0	0	0	0	0	0	0	0	0	0	0	0	0	0	0	0	0	0
49f226deb163e6cd5aa69b378441f176	0	0	0	0	0	0	0	0	0	0	0	0	0	0	0	0	0	0	0	0	0	0	0	0	0	0	0	0	0	0	0	0	0	0	0	0	0	0	0	0	0	0	0	0	0	0	0	0	0
89b2e3dbd09ea6be581f7727a596d1dc	0	0	0	0	0	0	0	0	0	0	0	0	0	0	0	0	0	0	0	0	0	0	0	0	0	0	18	0	0	0	0	0	0	0	0	0	0	0	0	0	0	0	0	0	0	0	0	0	0
b0f59ede423008d9079bd40dec8e60f2	0	0	0	0	0	0	0	0	0	0	0	0	0	0	0	0	0	0	0	0	0	0	0	0	0	0	0	0	0	0	0	0	0	0	0	0	0	0	0	0	0	0	0	0	0	0	0	0	0
c11024d14a174562407790213db74554	0	0	8	0	0	0	0	0	0	0	0	0	0	0	0	0	10	0	0	0	0	0	0	14	0	0	0	84	0	0	0	0	0	0	0	0	0	0	0	0	0	0	0	149	0	0	0	0	0
ccd2bfdd7410c6e09a31c09bb77a2154	0	0	29	0	0	0	0	0	0	0	0	0	0	0	0	0	0	0	0	0	0	0	0	0	0	0	32	0	0	0	0	0	0	0	0	0	33	0	0	30	0	0	0	40	0	0	26	0	21
9da5889d34174e875dfe768e0ff0c877	371	8	869	8374	38	1919	4217	3286	1547	1340	2643	2717	0	7193	1531	4082	897	5	2832	85	0	5838	20	1701	5924	4386	9129	12	2472	2859	40095	2909	46	1129	2124	2224	19624	681	8261	8135	598	5048	1326	10	5318	11323	747	2685	51
e289951a9a8250b529430fb63c6e8dfa	0	0	0	0	0	0	0	0	0	0	0	0	0	0	0	0	0	0	0	0	0	0	0	0	0	0	0	0	0	0	0	0	0	0	0	0	0	0	0	0	0	0	0	0	0	0	0	0	15
fdfbe1f786312a7442a927918be03ad6	0	0	0	0	0	0	0	0	0	0	0	0	0	0	0	0	0	0	0	0	0	0	0	0	0	0	0	0	0	0	0	0	0	0	0	0	0	0	0	0	39	0	0	0	0	0	0	0	0
6b016ae36d56b3ca08b57b0d3de4a06c	0	0	0	0	0	0	0	0	0	0	0	0	0	0	0	0	0	0	0	0	0	0	0	0	0	0	0	18	0	0	0	0	0	0	0	0	0	0	0	0	0	0	0	0	0	0	0	0	0
46fd008b252352230e498f02a2b2a5d0	0	0	0	0	0	0	0	0	0	0	0	0	0	0	0	0	0	0	0	0	0	0	0	0	0	0	0	0	0	0	0	0	0	0	0	0	0	0	0	0	0	0	0	0	0	0	0	0	0
41192925def0c2661aa939561bf19543	0	0	78	0	0	39	0	0	0	0	0	0	18	0	0	0	0	0	0	0	0	0	0	0	0	0	0	0	0	0	0	0	0	43	0	0	0	26	0	0	42	0	0	0	0	0	0	0	0
341caff1300aa78cd6d20a52e037a0f7	617	0	0	24	0	0	695	0	39	0	173	0	0	47	0	166	0	0	56	109	156	9	105	0	0	24	0	0	0	0	22	75	0	0	0	24	0	0	24	177	0	0	0	0	0	19	0	0	0
d70a690b28f2b678e4698687f33b5a55	42	293	87	29	326	409	0	871	0	0	0	142	226	0	0	0	24	42	0	392	0	0	302	0	132	0	0	27	0	0	0	0	70	0	0	61	108	646	0	246	880	33	0	96	20	35	344	0	62
5b6dc80cff122ab9cf26bb8b81a0e9c2	47	71	20	287	88	140	108	52	98	9	28	0	290	58	365	53	0	71	280	72	358	133	1099	106	200	42	173	144	0	118	148	209	30	131	31	323	160	59	53	312	70	150	0	233	308	197	184	117	14
8c56b64d853d09876e0181d0b3fcd9c5	0	0	0	0	0	0	0	0	0	0	0	0	0	0	0	0	0	0	0	0	0	0	0	0	0	0	0	0	0	0	0	0	0	0	0	0	0	0	0	0	0	0	0	0	0	0	0	37	0
41229f6714100d2b0b3bffefdd69889b	0	0	0	0	0	0	0	49	0	0	0	0	0	0	0	0	0	0	0	0	0	0	0	0	0	0	0	0	0	0	0	0	0	0	0	0	0	0	0	0	0	0	0	0	0	0	0	0	0
039556118009725400a8d936ad4cd72d	0	0	0	0	0	0	0	0	0	0	0	0	0	0	0	0	0	0	0	0	0	0	0	0	0	0	0	0	0	0	0	0	0	0	0	0	0	0	0	0	0	0	0	0	0	0	0	0	0
b7e08e0f76a548d931640cf00e781322	0	0	0	0	0	0	0	0	0	0	0	0	0	0	0	0	0	0	0	0	0	0	0	0	0	0	0	0	0	0	0	0	0	0	0	0	0	0	0	21	0	0	0	0	0	0	0	0	0
367ea5b139a79114f5fa6b59289ff6da	0	0	50	65	0	0	0	65	98	12	0	0	0	0	0	0	81	75	0	0	23	0	0	32	0	0	0	0	0	0	0	0	0	0	0	0	0	62	0	0	42	0	30	164	0	0	0	0	0
c2a48756bb1aff3c944d9e72948f5146	0	0	0	0	0	0	0	0	0	0	0	0	0	0	0	0	0	0	0	0	0	0	0	0	0	0	0	0	0	0	0	0	0	0	0	0	0	17	0	0	0	0	0	0	0	0	0	0	0
7e9ebd315e7e19b072531614fbc96615	0	0	0	0	0	21	0	0	0	0	0	0	0	0	0	0	0	0	0	0	0	0	0	0	0	0	0	0	0	0	0	0	0	0	0	0	0	0	0	0	0	0	0	0	0	0	0	0	0
cfc51d08bd89037191b008fcf87fe867	129	4394	44	2823	4479	1401	2885	978	1114	93	2353	469	6064	621	145	318	1029	2243	298	266	0	3066	0	3226	886	547	16979	0	202	1026	6482	635	38	757	154	368	3265	373	569	3350	311	2133	272	2215	1390	1526	628	1612	24
8f56b2b9407c603401ecbeda10903e39	0	0	36	0	0	0	0	0	0	0	0	0	0	0	0	0	0	0	0	0	0	0	0	0	0	0	0	0	0	0	0	0	0	0	0	0	0	0	0	0	0	0	0	0	0	0	0	0	0
dfdef3e9053bb34a3b07260003681309	0	20	19	28	21	25	9	22	29	0	11	0	10	0	25	8	9	0	11	16	0	0	13	0	12	0	0	36	0	0	0	0	21	75	0	17	33	17	0	28	23	0	7	34	0	45	24	0	45
b6d1ea31e67b1395ffb3e68756c48c9f	0	0	0	0	0	0	0	0	0	0	0	0	0	0	0	0	18	0	0	0	0	0	0	0	0	0	0	0	0	0	0	0	0	0	0	0	0	0	0	0	0	0	0	0	0	0	0	0	0
710764d8cf9ec06346d2c95f3da92332	0	106	0	0	107	0	0	0	0	6	39	0	0	0	0	0	0	0	0	0	0	0	0	0	0	0	0	0	0	25	0	0	0	0	0	0	0	0	0	0	0	0	0	0	0	78	65	0	0
22b8031334d9c134d13a3965e82dab12	0	0	0	0	0	0	0	0	0	0	0	0	0	0	0	0	0	0	0	0	0	0	0	0	0	0	0	0	0	0	0	0	0	0	0	0	0	0	0	0	0	0	0	0	0	0	38	0	0
1b739726961269ee1ea9f901980a0d28	0	183	530	0	180	238	0	48	20	12	0	45	483	33	381	0	88	36	8	222	0	0	0	49	0	21	57	36	65	0	34	0	0	486	26	48	22	135	0	152	185	92	57	379	66	0	151	0	237
cf9cfdedcfba8059a3758c2c4a5fd581	0	0	0	0	0	0	0	63	0	0	0	0	0	0	0	0	0	0	0	0	0	0	0	0	0	0	0	0	0	0	0	0	0	0	0	0	0	0	0	0	0	0	0	0	0	0	0	0	0
8d855030597571a964e0e2b189078553	0	0	0	0	0	0	0	0	0	0	0	0	0	0	0	0	0	0	0	0	0	0	0	0	0	0	0	0	0	0	0	0	0	0	0	0	0	0	0	17	0	0	0	0	0	0	0	0	0
88ed5be1c99f42d1f74feeb984f41195	0	0	0	0	0	0	0	0	0	0	0	0	0	0	0	0	0	0	0	0	0	0	0	0	0	0	0	0	0	0	0	0	0	0	0	0	0	0	0	0	0	0	0	0	0	0	0	0	0
1517bcd18c074fd659afa51616c7a9e7	0	0	0	0	0	66	0	0	13	13	0	0	0	0	9	68	0	0	0	0	0	0	0	239	0	0	0	0	84	26	0	53	0	0	0	0	0	0	0	78	0	0	0	0	0	0	0	0	10
31bee138ce614b9d9682de70610f6c1e	0	315	656	25	392	109	0	40	64	0	0	478	253	25	249	26	133	190	0	42	452	35	65	585	238	0	139	49	36	0	122	13	0	783	25	0	96	363	0	0	395	111	75	273	67	33	33	0	162
bcd889dcdcd249db34f652c7d6888753	0	0	0	0	0	0	0	0	0	0	0	0	0	0	0	0	0	0	0	0	0	0	0	0	0	0	0	0	0	0	0	0	0	0	0	0	0	0	0	0	0	0	0	34	0	0	0	0	0
454b0a878239618947808f912a5d528f	0	0	0	0	0	0	0	0	0	0	0	0	0	0	0	0	0	0	0	0	0	0	0	0	0	0	0	0	0	0	0	0	0	98	0	0	0	0	0	0	0	0	0	0	0	0	0	0	0
e5d9ed18af2e93603fd85701b8488eb2	0	0	0	0	0	0	0	0	0	0	0	0	0	0	0	0	0	0	0	0	0	0	0	0	0	0	0	0	0	0	0	0	0	11	0	0	0	0	0	0	0	0	0	0	0	0	0	0	0
1abc7fb37eacfbe1af2d28a3a7a4800d	23	0	0	0	0	0	0	0	0	0	26	30	0	0	0	187	0	0	105	0	0	0	0	0	0	0	0	0	97	0	0	0	0	0	53	23	0	0	131	0	0	116	0	0	122	0	0	0	66
21410ebf3b319525216b5fe622c36a45	0	0	0	0	0	0	0	0	0	0	0	0	0	0	0	0	0	0	0	0	0	0	0	0	0	0	0	0	0	14	0	0	0	0	0	0	0	0	0	0	0	0	0	0	0	0	0	0	0
92607da58f11122e034fb5a5c8df91bb	0	0	0	0	0	0	0	666	0	0	0	0	0	0	0	0	0	0	0	0	0	0	0	0	0	0	0	0	0	0	0	0	592	0	0	0	0	0	0	296	0	0	0	0	0	22	0	0	0
156b35fa6c9b287e0d916e1dbf3591dc	74	0	0	0	0	0	0	0	0	0	0	0	0	0	0	0	0	0	0	0	0	0	0	0	0	0	0	0	0	0	0	0	0	0	0	0	0	0	0	0	0	0	0	0	0	0	0	0	0
3968edb40ffab8430336a61e73b03e9f	0	0	0	0	0	0	0	0	0	0	0	0	0	0	0	0	0	0	0	0	0	0	0	0	0	0	0	0	0	0	0	0	0	0	0	0	0	0	0	0	0	0	0	0	0	0	0	0	0
fcca7a0d8d341de6a5f0d7184bc52c30	0	0	0	0	0	0	0	0	0	0	0	0	0	26	0	0	0	0	0	0	0	0	0	0	0	0	0	0	0	0	0	0	0	0	0	0	0	0	0	0	0	0	0	0	0	0	0	0	0
1bbf83d5914b2e3751b80d8fb57c4649	0	0	0	0	0	0	0	0	0	0	0	0	0	0	0	0	0	32	0	0	0	0	0	0	0	0	0	0	0	0	0	0	0	0	0	0	0	0	0	0	0	0	0	0	0	0	0	0	0
82ffd1b9465b98c7fdc01ac81fb46c0b	0	0	0	0	0	0	0	0	0	0	0	0	0	0	58	0	0	0	0	0	0	0	0	0	0	0	0	0	0	0	0	0	0	0	0	0	0	0	0	0	0	0	0	0	0	0	0	0	0
63a58c524100da17b7e732cf888aceb5	0	0	0	0	0	0	0	0	0	0	0	0	0	0	0	0	0	0	0	0	0	0	0	0	0	0	0	0	0	0	0	0	0	0	0	0	0	0	0	0	0	0	0	0	0	0	0	0	0
bca39ae2ea499b08494deaf3541e48ef	0	0	0	0	0	0	0	0	0	0	0	0	0	0	0	0	0	0	0	0	0	0	0	0	0	0	0	0	0	0	0	0	0	0	0	0	0	0	0	0	0	0	0	0	0	0	0	0	0
a606bdeb0512998987671f9aba640469	0	0	0	0	0	0	0	0	0	0	0	0	0	0	0	0	0	0	0	0	0	0	0	7	0	0	0	0	0	0	0	0	0	0	0	0	0	11	0	0	14	0	0	0	0	0	8	0	0
4ddd35e9bfd19a9f29a8009939354e35	0	0	0	0	0	0	0	0	0	0	0	0	0	0	0	0	0	0	0	0	0	0	0	0	0	0	0	0	0	0	0	0	0	0	0	0	0	0	0	0	65	0	0	0	0	0	0	0	0
22f7927379c582f25380944f8331446d	0	0	0	0	0	0	0	0	0	0	0	0	0	0	0	0	0	0	0	0	0	0	0	0	0	0	0	0	0	0	0	0	0	0	0	0	0	0	0	0	0	0	0	0	0	0	0	0	0
af7793e32f33842bc0a0f3d921f07a55	0	0	0	0	0	0	0	0	0	0	0	0	0	0	0	0	0	0	0	0	0	0	0	0	0	0	0	0	0	0	0	0	0	0	0	0	0	0	0	0	0	0	0	0	0	0	0	0	0
b78ac21d6308b817cdfb5e2cb6b630c7	0	0	0	0	0	0	0	0	0	0	0	0	0	0	0	0	0	0	0	0	0	0	0	0	0	0	0	0	0	0	0	0	0	0	0	0	0	0	0	0	0	0	0	0	0	0	0	0	0
dbcdfacffd6687e189456ebf3090ab2b	17	0	0	0	0	0	0	0	0	0	0	0	0	0	19	0	0	0	0	0	0	0	0	0	0	14	0	0	0	0	0	0	0	0	0	0	0	0	0	0	11	0	0	0	0	0	0	0	0
39ef7b0119fa7a7c84be2155c795c6fb	0	0	0	31	0	0	0	0	0	0	0	0	0	0	0	0	0	0	0	0	0	39	0	40	0	0	0	0	109	0	0	0	0	0	46	0	0	0	0	0	0	0	0	0	0	0	0	0	0
35e9d96370a6df09beccd3872a1e9433	0	0	0	0	0	0	0	4	9	0	0	177	0	0	11	215	0	0	0	7	0	0	0	0	4	0	6	5	99	5	0	0	9	0	3	0	0	0	0	0	4	0	232	0	0	10	0	46	0
91bab5a823a25d7526c67ae0ba4b8eea	19	894	41	702	1083	28	938	469	14	347	277	585	153	109	30	259	654	496	24	28	1263	551	127	115	741	44	1110	0	1109	377	815	247	11	33	644	310	361	59	283	485	44	73	49	12	75	67	43	38	98
acaaf8f00846c21e16f90866b82836a4	0	0	0	0	0	0	0	0	0	0	0	0	0	0	0	0	0	0	0	0	0	0	0	0	0	0	0	0	0	0	0	0	0	0	0	0	0	0	0	0	0	0	0	0	0	0	0	0	0
e845e9eeda946935ed1f37c882901b88	0	0	0	0	0	0	0	0	0	0	0	0	0	0	0	0	0	0	0	0	0	0	0	0	0	0	0	0	0	0	0	0	0	0	0	0	0	0	0	10	0	0	0	0	0	0	0	0	0
dbcbbcb04efc4dca60b404149439503d	0	0	0	0	0	0	0	0	0	0	0	0	0	0	0	0	0	0	0	17	0	0	0	0	0	0	0	0	0	0	0	0	0	0	0	0	0	0	0	0	0	0	0	0	0	0	0	0	0
1513b5a0d7da318446a2a9e26107ae51	0	0	0	0	0	0	0	0	0	0	0	0	0	0	0	0	0	0	0	0	0	0	0	0	0	0	0	0	0	0	0	0	0	0	0	0	0	0	0	0	0	0	0	0	0	0	0	0	0
19adb1c6ac3297d7bad963a180d2b569	0	0	0	0	0	0	0	0	0	0	0	0	0	0	0	0	0	0	0	0	0	0	0	14	0	0	0	0	0	0	0	0	23	0	0	0	0	0	0	0	0	0	0	0	0	0	0	0	0
299c96abb181397763ae1dc1c1769196	0	0	0	0	0	0	0	0	0	0	0	0	0	0	0	0	0	0	0	0	0	0	0	0	0	0	0	0	0	0	10	0	0	0	0	0	0	0	0	0	0	0	0	0	0	0	0	0	0
f398de000bb686e21f3e096ab7246917	0	0	0	0	0	0	0	0	0	0	0	0	0	204	0	0	0	0	0	0	0	0	0	0	0	0	0	0	0	0	0	0	0	0	0	0	0	0	0	0	0	0	0	0	0	0	0	0	0
e89302cf3f6ea595fe6354370ab08abb	0	0	23	0	0	30	0	8	63	0	0	0	0	0	49	0	0	0	0	43	0	0	0	0	0	0	0	0	0	0	0	0	0	13	0	0	19	49	0	0	46	0	0	68	0	0	22	0	20
000b0b88ceb19d19678f6c3a39f2db73	0	0	0	0	0	0	0	0	0	0	0	0	0	0	0	0	0	0	0	0	0	0	0	0	0	0	0	0	0	0	0	0	25	0	0	0	0	0	0	0	0	0	0	0	0	0	0	0	0
032a52fbd5e5f2072b374391fd297c7f	0	0	0	0	0	0	0	0	116	0	0	0	0	0	0	0	0	0	0	0	0	0	0	0	0	0	0	0	0	0	0	0	0	0	0	0	0	0	0	0	0	0	0	0	0	0	0	0	0
4b35afa36a701402a5b880e31fe5bf10	0	0	0	0	0	0	0	0	0	0	0	0	0	0	0	0	0	0	0	0	0	0	0	0	0	0	0	0	0	0	0	0	0	0	0	0	100	0	0	0	0	0	0	0	0	0	0	0	0
a9cba5274432053d7a3a957e562557f2	0	0	0	0	0	0	0	0	0	0	0	0	0	0	0	0	107	0	0	0	0	0	0	0	0	0	0	0	0	0	0	0	0	0	0	0	0	0	0	0	0	0	0	0	0	0	0	0	0
06a46d865b7fa28372b77fdb0e4fba80	0	0	0	0	0	0	0	0	0	0	0	0	0	0	0	0	0	0	0	0	0	0	0	0	0	0	0	0	0	0	0	0	0	0	0	0	0	0	0	0	0	0	105	0	0	0	0	0	0
da25df37f1000913541eaac7cd413fbb	0	0	0	0	0	0	0	0	0	0	0	0	0	0	0	0	0	0	0	0	0	0	0	0	0	87	0	0	0	0	0	0	0	0	0	0	0	0	0	0	0	0	0	0	0	0	0	0	0
974141eddbde233e49e93be0967fa34a	0	0	0	0	0	0	0	0	0	0	0	0	0	0	0	0	0	0	0	0	0	0	0	0	0	0	17	0	0	0	0	0	14	0	0	0	0	0	0	0	0	0	0	0	0	0	0	0	0
be98c23f8e5f1f7d27da0674a9f1642d	0	0	0	0	0	0	0	0	0	0	0	0	0	0	0	0	0	0	0	0	0	0	0	0	0	0	0	0	0	0	0	0	0	0	0	0	0	0	0	0	0	0	0	0	0	0	0	0	0
53936e92c7c20db79a15b58d1191ea10	0	0	0	0	0	0	0	0	0	0	0	0	0	0	0	0	0	0	0	0	0	0	0	0	0	0	0	0	0	0	0	0	0	0	0	0	0	0	0	0	0	0	0	0	0	0	0	0	0
9d28aa97a2b61bdb201c6e121e1d6648	0	0	0	0	0	0	0	0	0	0	0	0	35	0	0	0	0	0	0	0	0	0	0	0	0	0	0	0	0	0	0	0	0	0	0	0	0	0	0	0	0	0	0	0	0	0	0	0	0
a375bf9865861528aae1231a1a84aef4	0	0	0	0	0	0	0	0	0	0	0	0	0	0	0	0	0	0	0	0	0	0	0	0	0	0	0	0	0	0	0	0	0	0	0	0	0	0	0	0	0	0	0	0	0	0	0	0	0
72be2b6c2b12f70105dc990c9ed687b4	0	0	0	0	0	0	0	0	0	0	0	0	0	0	0	0	0	0	0	0	0	0	0	0	0	0	0	0	0	0	0	0	0	0	0	0	0	0	0	0	0	0	0	0	0	0	0	0	0
8fb824cf8fe8f5869daa3709f18e150f	0	0	0	0	0	0	0	0	0	0	0	0	0	0	46	100	0	0	0	0	0	0	0	0	0	0	0	0	0	0	0	0	0	0	0	0	0	0	0	0	0	0	0	0	0	0	0	0	0
a1b8e6c7bdd258a372ce3d2d37c95111	0	78	0	0	0	0	0	0	0	0	0	0	0	0	0	0	0	0	0	0	0	0	0	0	0	0	0	0	0	0	0	0	0	0	0	0	0	0	0	0	0	0	0	0	0	0	0	0	0
6854d229df4bfd29cf48416386cfde68	0	83	117	126	68	386	0	147	519	0	35	19	386	24	38	0	17	157	0	151	0	182	25	56	167	23	77	418	44	60	39	0	0	91	16	0	18	31	10	82	34	159	0	365	138	0	0	18	404
637ab6d043b4e81cbbc858e5f3197d3b	0	0	0	0	0	0	0	0	0	0	0	0	0	0	0	0	0	0	0	0	0	0	0	0	0	0	0	0	0	226	0	0	0	0	0	0	0	0	0	113	0	0	0	0	0	0	0	0	0
df937319ed8e5920d4a1c63221225a5b	0	0	0	0	0	0	0	0	0	0	0	0	0	0	0	0	0	0	0	0	0	0	0	0	0	0	0	0	0	0	0	0	0	244	0	0	0	0	0	0	0	0	0	0	0	0	0	0	0
d7dbc659b8cb377388194f7858ae97cb	0	0	0	0	0	0	0	0	0	0	0	0	0	0	0	0	0	0	0	0	0	0	0	0	0	0	0	0	0	0	0	0	0	0	0	0	0	0	0	0	0	0	0	0	0	0	0	0	0
95c7a9d8db58c66a8345702e26e6fc5c	0	0	0	0	0	0	0	0	0	0	0	0	0	0	0	0	0	0	0	0	0	0	216	0	0	0	0	0	0	0	0	0	0	0	0	0	0	0	0	204	0	0	0	0	0	153	0	0	0
c8e144c2631a3557ff7cd215baee5aca	0	0	0	0	0	0	0	0	0	0	0	0	0	0	0	0	0	0	0	0	0	0	0	0	0	0	47	0	0	0	0	0	0	0	0	0	0	0	0	0	0	0	0	0	0	0	0	0	0
3892927ade11281e893fa517551c4f3a	0	0	0	0	0	0	0	0	0	0	0	0	0	0	0	0	0	0	0	0	0	0	0	0	0	0	0	0	0	0	0	0	0	0	0	0	0	0	0	0	0	17	0	0	0	0	0	0	0
7ff346973a282aa55de296afdb5d74af	0	0	0	0	0	0	0	0	0	0	0	49	0	0	0	146	6	0	0	0	0	0	0	0	0	0	0	11	29	0	0	0	0	0	0	0	0	8	21	0	0	0	269	0	0	9	0	0	0
43138dbdeeff63a2424260e0b3e9d653	0	21	6	0	18	0	0	21	12	0	0	0	0	0	0	0	7	0	0	8	0	0	37	8	0	0	64	0	0	5	28	0	169	0	0	0	84	0	0	30	8	0	0	8	0	6	0	0	0
3b342b96bebf5d9a912c159d1e52c980	0	0	0	0	0	0	0	0	0	0	0	0	0	0	0	0	25	0	0	0	0	0	0	0	24	0	0	0	0	0	0	0	0	0	0	0	0	0	0	0	0	0	0	0	0	0	0	0	0
66eb44fb68bb88509064cb16d0dd60ec	0	0	0	0	0	0	0	0	0	0	0	0	0	0	0	0	0	0	0	0	0	0	0	0	0	0	0	0	0	0	0	0	0	0	0	0	0	0	0	44	0	0	0	0	0	0	0	0	0
7e14c67cfd07d8eb0995c87f8159a53d	0	0	0	0	0	0	0	0	0	0	0	31	0	0	0	0	0	0	0	0	0	0	0	0	0	0	0	0	0	0	0	0	0	0	0	0	0	0	0	0	0	0	0	0	0	0	0	0	0
04cc1f4609cb2224ef3da93c7932d35f	0	0	0	0	0	0	0	0	0	0	0	0	0	0	0	0	0	0	0	0	0	0	0	0	0	0	0	0	0	0	0	0	0	0	0	0	0	0	0	0	0	0	0	0	0	0	0	0	0
55498777ce810b90ed8dca9b72386d6a	0	0	0	17	0	0	0	0	0	0	0	0	0	0	0	0	0	0	0	0	0	0	0	0	0	0	0	0	0	0	0	0	0	0	0	0	0	0	0	0	0	0	0	0	0	0	0	0	0
90f493cae5dfee98dd6052e038685794	0	283	0	51	278	0	0	0	0	148	0	107	91	0	0	29	50	0	19	0	227	50	181	0	0	0	235	0	165	83	198	0	0	0	303	60	0	0	0	186	0	77	54	0	0	230	0	0	0
89fb874c7dffa341c1e90d323349f30c	0	0	0	0	0	0	0	0	0	94	0	549	0	0	0	0	0	0	0	0	0	0	0	0	0	0	0	0	139	0	0	0	0	0	137	0	0	0	0	0	0	0	0	0	0	0	0	0	0
d3f773097b66aa78e663c308ee405f8a	0	0	0	0	0	0	0	0	0	0	0	0	0	0	0	0	0	0	0	0	0	0	0	0	0	0	0	48	0	0	0	0	0	0	0	0	0	0	0	0	0	0	0	0	0	0	0	0	0
7d700b40cd6742aa04071c99a71682bf	0	0	0	0	0	0	0	0	0	0	0	0	0	0	0	0	0	0	0	0	0	0	0	0	0	0	0	0	0	0	0	0	0	0	0	0	0	0	0	0	0	198	0	0	0	0	0	0	0
362e6730c06b998ac7f723e0bfc86688	0	0	0	0	0	127	0	0	0	0	0	0	0	120	0	0	0	50	0	0	0	0	0	0	0	113	0	0	0	0	0	0	0	172	0	0	23	0	0	0	0	125	0	0	73	0	0	0	0
58a8e98635841cf4fa13aa50818cfa99	0	0	0	0	0	0	0	0	0	0	0	0	0	0	0	0	0	0	0	0	0	0	0	0	0	0	0	0	0	0	0	0	0	0	0	0	0	0	0	0	0	0	0	0	0	0	0	0	0
5c0ba334346798ba4f36a93f74b1c410	0	0	0	0	0	0	0	0	0	0	0	0	0	0	0	0	0	0	0	0	0	0	0	0	0	0	0	0	0	0	0	0	0	0	0	0	0	0	0	0	0	0	0	0	0	0	0	0	0
8bbcfbc107d180bb941c14d753e0d944	0	0	0	0	0	0	0	103	124	0	0	80	0	0	0	0	0	0	0	0	0	36	0	0	0	0	178	0	65	0	198	0	0	0	0	0	0	0	0	86	0	0	78	0	0	0	0	0	0
582136dc72b3d42b10fb72a88ae1f74f	27	56	222	80	88	79	25	33	21	35	51	0	24	357	247	17	11	0	161	87	46	62	0	0	199	256	120	28	215	73	153	54	28	166	68	0	40	36	20	78	44	34	0	178	45	312	0	94	0
fe8fda8412503fd7e19b5be2060aa6ec	0	0	11	0	0	0	0	0	0	0	0	0	0	0	0	0	0	0	0	0	0	0	0	0	0	0	0	0	0	0	0	0	0	0	0	0	0	0	0	0	0	0	0	0	0	0	0	0	0
e0b29293d121b279d167e8b8abd5064a	40	134	0	535	168	32	105	249	0	0	792	65	0	0	0	34	0	204	0	0	0	520	0	253	203	0	74	0	0	1907	179	62	0	0	0	0	35	0	117	49	0	710	0	0	639	51	0	52	0
7a6d4a1bfc7606e2b28d1aec9abe8368	0	0	0	0	0	0	0	0	0	0	0	0	0	0	0	0	0	0	0	14	0	0	0	0	0	0	0	0	0	0	0	11	0	0	0	0	0	0	0	0	0	0	0	0	0	0	12	0	0
eb348507d6c13e8533c7da97fda7ebcf	0	0	0	0	0	0	0	113	0	0	30	0	0	0	0	0	0	0	19	0	0	0	0	0	0	0	0	0	0	0	0	120	1982	0	0	0	558	0	15	235	0	0	564	0	19	0	0	42	0
4ac23b41eae0fd574a91a40375e431b0	0	70	87	112	84	70	183	0	136	0	0	0	78	226	0	0	0	0	189	0	0	103	0	48	0	77	76	0	0	54	286	117	0	79	0	110	216	45	0	375	0	251	0	0	214	0	54	0	0
a6c24fb2ff9fadbe8ec78988585e7bd0	0	0	0	0	0	0	0	0	0	0	0	0	0	0	0	0	0	0	0	0	0	0	0	0	0	0	0	0	0	0	0	0	0	0	0	0	0	0	0	0	0	0	0	29	0	0	0	0	0
99732e2796b407371c1c5fe72b670ebf	0	0	0	0	0	0	0	0	0	0	0	0	0	0	0	0	0	0	0	0	0	0	0	0	0	0	0	20	0	0	0	0	0	0	0	0	0	0	0	0	0	0	0	0	0	0	0	0	0
1b829f6ce5ef89a757b3c12b40656afc	0	0	0	0	0	0	0	0	0	0	0	0	0	0	0	0	0	0	0	0	0	0	0	0	0	0	0	0	0	0	0	0	0	0	0	0	0	0	0	0	0	0	0	0	0	0	0	0	0
788d5d4933f3ef2e236744cc347acdbd	0	240	0	125	277	0	28	0	0	0	0	18	0	0	0	19	28	28	0	0	126	102	0	47	75	0	236	0	0	170	202	64	0	23	56	22	281	0	82	0	0	0	0	34	0	132	0	106	0
d5d22156bbcfdb9cb7105bf8927d9837	0	0	0	0	0	0	0	0	0	0	0	0	0	0	0	0	0	0	0	0	0	0	0	0	0	0	0	0	0	0	0	0	0	0	0	0	0	0	0	0	0	0	0	0	50	0	0	0	0
ba2ef899c91ee4ec0465cb13782c5858	0	0	8	0	0	7	0	0	0	0	0	0	0	0	19	0	9	0	0	0	0	0	13	0	0	0	0	0	0	0	0	0	0	11	0	0	0	0	0	0	0	0	0	0	0	0	0	0	3
80b5480e1b4c2264e3d562894ec47764	0	0	0	0	0	0	0	0	0	0	0	0	0	0	0	0	0	0	0	0	0	0	0	0	122	0	0	0	0	0	0	0	0	0	0	0	0	0	0	0	0	0	0	0	0	0	0	0	0
e10a9805c83b91f9a59281ea614533ba	0	0	0	0	0	0	0	0	0	0	0	0	0	0	0	0	0	0	0	0	0	0	0	0	0	0	0	0	0	0	0	0	0	0	0	0	0	0	0	0	0	0	0	0	0	0	0	0	0
550ff611984622764071addf2add212d	0	0	30	42	0	30	0	0	0	0	0	0	39	0	0	39	0	0	28	0	41	38	0	0	0	0	0	0	0	0	26	0	39	0	17	0	63	0	0	57	26	36	0	0	26	26	0	0	0
9815f4f552b82cb33f579d5d9d2d4ed6	26	0	0	22	0	0	0	0	0	0	0	0	0	0	0	0	0	0	0	0	0	24	0	0	0	0	0	0	0	0	0	11	0	0	0	0	0	0	0	0	0	0	0	0	0	0	0	0	0
430ea6b37cabe13a90cb2918d5b6073b	0	0	0	0	0	0	0	172	0	0	0	0	0	0	0	0	0	0	0	0	0	0	0	24	0	0	0	0	0	0	0	0	0	19	0	0	0	0	0	0	0	0	0	0	0	0	0	0	0
f83af7737fcc3c9fed327cd196b97961	0	0	0	0	0	0	0	0	14	0	0	0	0	0	0	0	0	0	0	0	0	0	0	0	0	0	0	0	0	0	0	0	0	0	0	0	0	0	0	0	0	0	0	0	0	0	0	0	0
a793cb0197714a1f56d91f188d950739	0	0	0	0	0	0	0	0	0	0	0	0	0	0	0	0	0	0	0	0	0	0	0	0	0	0	0	0	0	0	0	0	0	0	0	0	0	0	0	0	0	0	0	0	0	0	0	0	0
e05bfef6e1331902cf786817806eddd6	0	0	0	0	0	0	0	0	0	0	0	0	0	0	0	0	0	0	0	0	0	0	0	0	0	0	0	0	0	0	0	0	0	0	0	0	0	0	0	0	0	0	0	0	0	0	0	0	0
a0c27b7e5a611a28d9d97c9622eaeb13	0	0	0	0	0	0	0	0	0	0	0	0	0	0	0	0	0	0	0	0	0	0	0	0	0	0	0	0	0	0	0	0	0	0	0	0	0	0	0	0	0	0	0	0	0	0	49	0	0
e4e4bd94b3ef783289cf0617cc1332cf	0	0	46	0	0	62	0	21	15	0	0	0	64	0	0	0	0	0	0	0	0	0	117	0	0	0	0	0	0	0	0	0	0	0	0	0	0	0	0	0	0	0	0	13	0	0	0	0	0
c69a63c7f809214b08a0a25ee1f7b5a7	0	0	0	0	0	0	0	8	0	0	0	0	0	0	0	0	0	0	0	0	0	0	0	0	0	0	0	5	0	0	0	0	0	23	0	0	0	0	0	0	0	0	5	0	0	0	0	0	0
516f5ffa555d2bcf7f32723d61f374ad	0	0	0	0	0	0	0	0	0	0	0	0	0	0	0	0	0	0	0	17	0	0	0	0	0	0	0	0	0	0	0	0	0	0	0	0	0	0	0	0	0	0	0	0	0	0	0	0	0
138d879a7fef28edc45c85bc9b2706a7	0	0	0	0	0	0	0	0	0	0	0	0	0	0	0	0	0	0	0	0	0	0	0	0	0	0	0	0	0	21	0	0	0	0	0	0	0	0	0	0	0	0	0	0	0	0	0	0	0
d3e0ec4919c34dd80ac71b82e6330bf7	0	0	0	0	0	0	0	0	0	0	0	0	0	0	0	0	0	0	0	0	0	0	0	0	0	0	0	0	0	0	0	0	0	0	0	0	57	0	0	0	0	0	0	0	0	0	0	0	0
485f1e76cac54d9475c0961d75cef739	22	0	104	26	0	0	0	0	0	0	22	0	118	11	0	0	10	16	8	0	0	34	0	25	247	0	19	0	0	0	0	69	15	0	20	31	125	12	12	31	10	105	0	0	70	0	0	14	0
4c32a576ee354476c96e50e8b79c8541	0	0	0	0	0	0	0	0	0	0	0	0	0	0	0	0	0	0	0	0	0	0	0	0	0	0	0	0	0	0	0	0	0	0	0	0	44	0	0	0	0	0	0	0	0	0	0	0	0
fc619fc1ec25c618e66f550becf6b976	0	0	0	0	0	0	0	0	0	0	0	0	0	0	0	0	0	0	0	0	0	0	0	0	0	0	0	0	0	0	0	0	0	0	0	0	0	0	0	0	0	0	0	0	0	0	0	0	0
a099b394e1c5bf8da4ea283c5f27fd68	16	0	0	0	0	0	0	0	0	0	0	0	0	0	0	0	0	0	0	0	0	0	0	0	0	0	0	0	0	0	0	0	27	0	0	0	0	0	0	0	0	0	0	0	0	0	0	0	0
29dd7adff01276924257cdc1f37588f4	0	0	0	0	0	0	0	0	0	0	0	0	0	0	0	0	0	0	0	0	0	0	0	0	0	0	0	30	0	0	0	0	0	0	0	0	0	0	0	0	0	0	0	0	0	0	0	0	0
0706e0da3733fa0fecd11f45e90ea80e	0	0	0	0	0	0	0	0	0	0	0	0	0	0	0	0	0	0	0	0	0	0	0	13	0	0	0	0	0	0	0	0	0	0	0	0	0	0	0	0	0	0	0	0	0	0	0	0	0
60fcfa3fd24aab810a19cb49ef77f11b	0	0	0	0	0	0	0	0	0	0	0	0	0	0	0	0	0	0	0	0	0	0	0	0	0	0	0	0	0	0	0	0	0	0	0	0	0	0	0	0	0	0	12	0	0	0	0	0	0
4cd86665c77235312598ab31b17f0909	0	0	0	0	0	0	0	0	0	0	0	0	0	0	0	0	0	0	0	0	0	0	0	0	44	0	0	0	0	0	0	0	0	0	0	0	0	0	0	0	0	0	0	0	0	0	0	0	0
664a41a08597db54921bfca824182a49	238	0	30	56	0	95	0	80	151	0	162	0	90	65	936	162	43	83	99	58	0	35	0	0	201	42	34	20	50	136	25	0	20	63	0	139	128	1276	31	308	1264	266	32	128	185	0	84	28	54
f611e9108691e04c64d7f4987aafba36	0	0	0	0	0	0	0	0	0	0	0	0	0	0	0	0	0	0	23	0	119	0	0	0	28	0	0	0	0	0	0	0	0	0	0	0	0	0	0	0	0	0	0	0	0	0	0	0	0
3336b09f534a3a6d04392e1d17d74bc1	0	0	0	0	0	0	0	0	0	0	0	0	0	0	0	0	0	0	0	0	0	0	0	0	0	0	0	0	0	0	0	0	0	0	0	0	0	0	0	0	0	0	0	0	0	0	0	0	0
1ccf2a1d7ae38b2635ba7f8b12a0aeb2	0	0	0	0	0	0	0	0	0	0	0	0	0	0	0	0	0	0	0	0	0	0	0	0	0	0	0	0	0	0	0	0	28	0	0	0	0	0	0	0	0	0	0	0	0	0	0	0	0
b165e7900c12b495f83f24a22b4dfe21	0	0	0	0	0	0	0	0	0	0	0	0	0	0	0	0	0	0	0	0	0	0	103	0	0	0	0	0	0	0	0	0	0	0	0	0	0	0	0	0	0	0	0	0	0	0	0	0	0
d76c5f52123e66f545f07348efa7ce1a	0	0	0	0	0	0	0	101	0	0	0	0	0	0	0	0	0	0	0	0	0	0	0	0	0	0	0	0	0	0	0	0	0	0	0	0	0	0	0	0	0	0	0	0	0	0	0	0	0
ff009ab211e3fdaa714d27426d9e3ad3	0	0	0	0	0	0	0	0	0	0	0	0	0	0	0	31	0	0	0	0	0	0	0	0	0	0	0	0	0	0	0	0	0	8	0	0	0	0	0	0	0	0	0	0	0	0	0	0	0
557f0839ceb62d6435892f802bfebb07	0	0	0	0	0	0	0	0	0	0	0	0	0	0	0	0	0	0	0	0	0	0	0	0	0	0	0	0	0	0	0	0	0	0	0	0	0	0	0	0	0	0	0	0	0	0	0	0	0
7090d861f8cfa48b368f9710444321ef	0	0	0	0	0	0	0	0	0	0	0	0	0	0	0	0	0	0	0	0	0	0	0	0	0	0	0	0	0	0	0	0	0	0	0	0	0	0	0	0	0	0	0	0	0	0	0	0	0
7a368546e78ca427b104e8a2b4252c68	0	0	0	32	0	0	79	0	0	0	66	0	0	0	0	115	0	0	0	0	0	37	0	0	493	0	0	0	0	46	0	0	0	0	0	68	0	0	0	0	0	484	0	0	214	0	0	0	0
7e99923f5f293e2ffe96736d1bc67a5c	0	0	0	88	76	0	114	0	0	0	163	36	137	69	89	0	27	66	81	63	0	66	91	0	115	47	85	43	0	119	0	120	0	40	53	49	167	0	0	102	0	131	0	29	113	155	112	0	0
c23f3de286030fc5cbcb322115939e8d	0	0	0	0	0	0	0	0	0	0	0	0	0	0	0	0	0	0	0	0	0	0	0	0	0	0	0	0	0	0	0	0	0	0	0	0	0	0	0	0	0	0	0	0	0	0	0	0	0
b163d324895582664434e23ab7d7ba2f	0	0	0	0	0	0	0	0	0	0	0	0	0	0	0	0	0	0	0	0	0	0	0	0	0	0	0	0	0	0	0	0	0	0	0	0	0	0	0	0	0	0	0	0	0	0	0	0	0
033c8007bf2443d24f32fa01d0bca23e	0	0	0	0	0	0	0	0	0	714	0	0	0	0	0	0	0	0	0	0	0	0	0	0	0	0	0	0	0	0	0	0	0	0	0	0	0	0	0	0	0	0	0	0	0	0	0	0	0
94efad004d50d5b3f8b415b38a11a5cc	0	0	0	0	0	0	0	0	0	0	0	0	0	0	0	11	0	0	0	0	0	0	0	0	0	0	0	0	0	0	0	0	0	0	0	0	0	0	0	0	0	0	0	0	0	0	0	0	0
cf45f83d74d3fad7c575aeafc2effbd6	0	0	85	0	0	190	0	0	136	0	0	0	0	348	356	0	90	17	0	0	0	0	61	0	156	235	0	40	0	0	43	35	0	0	0	0	67	23	0	60	42	0	0	0	45	0	100	104	0
cd33f2edaf9507c39ffb8f9aed0c0488	0	265	0	0	391	0	0	18	0	0	0	0	0	0	0	0	0	0	0	0	0	0	0	0	0	0	0	0	0	0	0	0	0	0	0	0	0	0	0	0	0	0	0	0	0	0	0	0	0
7122752693ee9b97d1934adc6f2f9ff1	0	0	0	0	0	0	0	0	0	0	0	0	0	0	0	0	0	0	0	0	0	0	0	0	0	0	0	0	0	0	0	0	0	0	0	0	0	0	0	0	0	0	247	0	0	0	0	0	0
064d05fd898d0fa902ca5581fe8b0c57	0	0	0	0	0	0	0	0	0	0	0	0	0	0	0	0	0	0	0	0	0	0	0	0	0	0	0	0	0	0	0	0	0	0	0	0	0	0	0	0	0	198	0	0	0	0	0	0	0
b5d14bb2f8e9ce90e0348d90fb1d5ee7	0	0	0	0	0	19	0	0	0	0	0	0	30	0	0	0	0	0	0	0	0	0	0	0	0	0	0	0	0	0	0	0	0	0	0	0	0	0	0	0	0	0	0	49	0	0	0	0	0
dc14bdcbb3b80ca67eeeb78167eb9c1e	0	0	98	0	0	115	0	0	0	13	0	0	40	87	59	0	0	0	0	70	0	0	32	0	406	89	49	0	30	137	65	0	0	0	28	0	72	0	0	50	0	0	0	0	0	0	39	0	13
eb2c7da0629f0b7e466e0d47abfb2199	0	0	0	0	0	0	0	0	0	0	0	0	377	0	0	0	0	0	0	0	0	0	0	0	0	0	0	0	0	0	0	0	0	34	0	0	0	0	0	0	0	0	0	0	0	0	0	0	0
83425368991e964b7d85840eaa53ea3b	0	0	0	0	0	0	0	0	0	0	0	0	0	0	0	0	0	0	0	0	0	0	0	0	0	0	0	0	0	0	0	0	0	0	0	0	0	0	0	99	0	0	0	0	0	0	0	0	0
7e1f57d91b86844ac1debba86c16005d	0	0	0	0	0	0	0	0	0	0	0	0	0	0	0	0	0	0	0	0	0	0	0	0	0	0	0	0	0	0	0	0	0	0	0	0	0	0	0	0	0	0	0	0	0	0	0	0	0
e3b409a6c9220a2ab81a2fddd10ee43c	0	0	0	0	0	5	0	0	0	0	0	0	182	0	4	0	6	0	0	0	0	0	0	0	0	0	0	0	0	0	0	0	0	0	0	0	0	7	0	0	0	0	0	0	0	0	0	0	0
35883e026a0a0884845df2562a98d39f	0	0	0	0	0	0	0	0	0	0	0	12	0	0	0	0	0	0	0	0	0	0	0	0	0	0	0	0	0	0	0	0	0	0	0	0	0	0	0	0	0	0	0	0	0	0	0	0	0
a14c519f2482217fcd1db05b1c762023	0	0	0	0	0	0	0	0	0	0	0	0	0	0	0	0	0	0	0	0	0	0	0	0	0	0	0	8	0	0	0	0	0	0	0	0	0	0	0	0	0	0	0	19	0	0	0	0	0
b4c1bd668bb16a139a2b5fa78b6788cf	0	0	0	0	0	0	0	0	0	0	0	0	0	0	0	0	0	0	0	0	0	0	0	0	0	0	0	0	0	0	0	0	0	0	0	0	0	0	0	0	0	0	0	44	0	0	0	0	0
e1bb819592518b965a4278696acbbe96	157	339	70	0	434	61	0	131	108	0	136	38	75	60	139	0	252	0	44	158	0	0	105	120	0	32	67	482	0	131	0	28	463	27	0	0	146	73	186	161	81	0	0	203	16	0	75	0	70
529b9482944dd0ea5bf4257f5adea001	0	0	0	0	15	0	0	21	0	0	0	0	0	0	0	0	0	0	0	4	0	0	0	0	0	0	11	0	0	0	0	0	36	0	0	0	10	0	0	0	0	0	0	26	0	0	0	0	0
cc69705f016599579fafaae0a22b6f96	61	9	0	31	0	0	13	0	8	6	0	0	0	48	0	0	0	90	87	24	0	37	0	0	49	19	0	0	33	0	0	0	107	0	15	67	14	0	0	80	0	95	0	0	92	0	0	0	0
43105f05a2992d8ba7e0af198dc3d9d2	0	0	0	0	0	0	0	0	0	0	0	0	0	0	0	0	0	0	0	0	0	0	0	0	0	0	0	0	0	0	0	0	15	0	0	0	0	0	0	0	0	0	0	0	0	0	0	0	0
49a6896ed493adae10963cee41faf719	0	0	0	0	0	0	0	0	0	0	0	0	0	0	0	0	0	0	0	0	0	0	0	0	0	0	0	0	32	0	0	0	0	0	0	0	0	0	0	0	0	0	0	0	0	0	0	0	0
dcedf5d16e2605c05415af11855c4862	0	0	0	28	0	8	0	99	0	31	0	0	0	0	0	13	0	85	10	0	0	0	0	0	0	0	62	0	94	317	26	177	0	0	48	74	1027	0	0	46	0	31	60	0	30	791	0	44	0
aaeb103625250f45667161cb666e9386	28	0	0	0	0	0	0	0	0	0	0	0	0	0	0	0	0	0	0	0	0	0	0	0	0	0	0	0	0	0	0	0	0	0	0	0	0	0	0	31	0	0	0	0	0	0	0	0	0
d312b707c4b12297faec34d2e08f4ce5	0	0	0	0	0	0	0	11	0	0	0	0	0	0	0	0	7	0	0	0	0	0	0	0	0	0	0	0	0	0	0	0	22	0	0	0	0	0	0	0	0	0	0	0	0	0	0	0	0
9c16b7112da42a1c90101a491e150ffa	0	0	0	0	0	0	0	0	0	0	0	0	0	0	0	0	0	0	0	0	0	0	0	0	0	0	0	0	0	0	0	0	0	0	0	0	0	0	0	0	0	0	18	0	0	0	0	0	0
e01d95aaa9c62d3eff576391be8072a6	0	0	0	18	0	0	0	0	0	0	20	0	0	0	0	0	0	0	0	0	0	0	0	0	0	0	0	0	0	0	0	0	0	0	0	0	0	0	0	74	0	0	0	0	0	0	0	0	0
95134b43809fde82172226f6a307d0d7	170	96	0	1471	66	0	68	153	0	154	285	0	0	242	0	329	0	230	633	0	40	1743	55	0	790	235	809	28	507	399	236	307	71	0	262	597	814	0	136	240	0	445	92	0	454	380	0	653	0
69972197cd7c68f71b174b2755ecb116	0	0	0	0	0	0	0	0	0	0	0	0	0	0	0	0	0	0	0	0	0	0	0	0	0	0	0	15	0	0	0	0	0	0	0	0	0	0	0	0	0	0	0	0	0	0	0	0	0
71d4fe1b631dc3b446ddb87ee6fd92f8	0	0	0	0	0	0	0	0	0	0	0	0	0	0	0	0	0	0	0	0	0	0	0	0	0	0	0	0	0	0	0	0	0	0	0	0	0	0	0	0	0	0	0	0	0	0	0	0	0
e1606b5789067b2aa88b1810ddb3fc52	0	0	0	0	0	0	0	0	0	0	0	0	0	0	0	0	0	0	0	0	0	0	0	0	0	0	0	0	0	0	0	0	0	0	0	0	0	0	0	0	0	0	0	195	0	0	0	0	0
84b3562c7a1b0001b61e8d0575605d0c	0	371	0	26	449	27	0	24	0	101	0	10	0	0	29	109	108	0	0	0	0	18	11	0	0	0	0	0	157	0	0	0	0	0	131	0	0	0	0	11	0	71	0	0	48	0	0	0	0
dc6064b89a2ceeee7c3bbc6c1d0d91eb	0	0	0	0	0	0	0	0	0	0	0	0	13	0	0	0	86	0	0	0	0	0	0	0	0	0	0	0	0	0	0	0	0	0	0	0	0	0	0	0	0	0	0	0	0	0	0	0	0
13a43937ddc4684010a2cda75e711d5b	0	0	0	0	0	0	0	0	0	0	0	0	0	0	0	0	0	0	0	0	0	0	0	0	0	0	0	0	0	0	0	0	0	0	0	0	0	0	0	0	0	101	0	0	70	0	0	0	0
117d4d4b51ce8b8dec346a545191ab56	0	0	0	0	0	19	0	0	0	0	0	0	0	0	0	0	0	0	0	0	0	0	0	0	0	0	0	0	0	0	0	0	68	0	0	0	69	0	0	0	0	0	0	0	0	0	0	0	17
f07e5e065d3bde85c3c2e28b3ff742c9	0	0	0	0	0	0	0	0	0	0	0	0	0	0	0	0	16	0	0	0	0	0	0	0	0	0	0	0	0	0	0	0	0	0	0	0	0	0	0	0	0	0	0	0	0	0	0	0	0
febaa329072b6f0de78fc090185138ad	0	0	0	0	0	0	0	0	109	0	136	0	95	0	44	0	0	0	0	52	0	0	0	37	0	0	0	61	0	0	33	0	78	0	0	0	438	303	0	0	328	0	0	32	0	0	82	0	202
d2e49f1ede82af685ef95a0c9b7e236f	0	0	0	0	0	0	0	0	0	0	0	0	0	0	0	0	21	0	0	0	0	0	0	0	0	0	0	0	0	0	0	0	29	17	0	0	13	0	0	0	0	0	0	0	0	0	0	0	0
1247bdd02fe876df9d9efe2b1e1cbbac	0	12	0	0	0	0	0	0	0	0	0	0	0	0	0	0	0	0	0	0	0	0	0	0	0	0	0	0	0	0	0	0	0	0	0	0	0	0	0	0	0	0	0	0	0	0	0	0	0
00b6be6862109614e8140f13d831cfc7	0	0	303	0	0	62	0	166	0	0	0	80	97	0	0	0	357	96	0	112	0	0	0	448	258	0	0	0	0	0	0	0	0	136	0	0	0	0	0	0	0	0	0	0	0	0	0	0	0
f2786295cb30fabc90d9faa0729f8c80	0	0	0	0	0	0	0	0	0	0	0	0	0	0	0	0	0	0	0	0	0	0	0	0	0	0	0	0	0	0	0	0	0	0	0	0	0	0	0	0	0	0	0	0	71	0	0	0	0
60e0cba6aae8095098f24f87bd8b4b90	0	0	0	0	0	0	9	5	0	0	6	0	0	0	0	0	0	5	0	0	0	0	0	31	0	0	0	0	0	10	0	0	0	0	0	0	0	5	0	0	0	0	0	0	0	8	0	0	0
06bfd52f05957fbd306ca41d99ae6efa	299	7902	715	1134	10469	1255	4146	4058	379	863	1607	2703	6827	357	483	451	636	2222	2590	1035	185	1087	3174	1591	3454	185	4174	786	2519	1381	2616	1546	45	488	1517	1126	28192	798	923	2825	599	3780	0	8498	3615	1834	2329	1921	198
c8c2a9fb3fd4138427f235fad8841305	0	0	98	0	0	0	0	0	0	0	0	0	0	0	45	0	0	66	0	48	0	0	0	0	78	0	0	275	0	0	0	0	0	0	0	0	0	171	0	0	254	0	0	0	0	0	0	0	38
251fe40e8dea3fe1540cddd5be56dc4f	0	0	21	0	0	0	0	0	0	0	0	0	0	0	0	0	0	0	0	0	0	0	0	0	0	0	0	0	0	0	0	0	0	0	6	0	0	0	0	0	0	0	0	0	6	0	0	0	0
3396a21246ea1d08114a51a9177dc263	2462	0	0	215	0	0	26	31	0	23	118	21	31	27	237	32	105	0	80	48	55	124	0	109	75	0	0	176	125	196	0	611	79	0	60	38	0	243	0	91	249	61	0	73	44	130	102	55	118
bce6c903735e41c97cbddd2f29752daa	0	939	51	0	1083	0	0	63	0	0	0	46	58	139	0	0	282	77	0	0	0	0	166	64	0	92	0	0	0	0	0	0	32	46	0	0	155	0	288	254	0	0	0	0	0	1423	0	0	0
a1907c862619b7760a7456bb622f2fe4	0	0	0	0	0	0	0	0	0	0	0	0	0	0	0	0	0	0	0	0	0	0	0	0	0	0	0	0	0	0	0	0	0	158	0	0	0	0	0	0	0	0	0	0	0	0	0	0	0
6824b0f2550c1b464cc0853f006eb0e5	0	0	0	0	0	67	56	0	0	0	0	0	0	0	0	0	0	0	0	0	0	0	0	0	0	0	0	0	0	0	0	0	0	1428	0	157	0	1277	0	0	1403	0	0	0	0	0	0	0	536
9fff0fa5c6831d886c206fb311a2d050	0	0	0	0	0	0	0	0	0	0	0	0	0	0	0	0	0	0	0	0	0	0	0	0	0	0	0	0	0	0	0	0	0	0	0	0	0	0	0	0	0	0	0	0	0	0	0	0	0
761ae612a3f119d04b07401f79c3ff6a	0	0	0	0	0	0	0	0	0	0	0	0	0	0	0	0	0	0	0	0	0	0	0	0	0	0	0	0	0	0	0	0	0	36	0	0	0	0	0	0	0	0	0	0	0	0	0	0	0
5a2a1669f8661edbd5f08ab212f3a922	0	0	0	0	0	0	0	0	0	0	0	0	0	0	0	0	0	0	0	0	0	0	0	0	0	0	0	0	0	0	0	0	15	0	0	0	0	0	0	0	0	0	0	0	0	0	0	0	0
112ccf57b8f3b41ea05ac752eeca419c	0	0	0	0	0	0	0	0	0	0	0	0	0	0	0	0	0	80	0	0	0	0	0	0	0	0	0	0	0	0	0	0	0	0	0	0	0	0	0	0	0	0	0	0	0	0	0	0	0
547ed9d63f007845c48db64ef3e5aab6	41	0	46	23	0	0	0	0	28	13	12	0	28	32	45	0	33	24	0	0	0	20	0	0	0	41	0	48	0	24	0	0	0	31	0	18	0	17	40	0	45	0	0	42	0	0	0	17	7
cb21e01be687903c5b8f01b3a83a4e57	0	0	0	0	75	0	0	0	0	0	0	0	0	0	0	0	0	0	0	0	0	0	0	0	0	0	0	0	0	0	0	0	0	0	0	0	0	0	0	0	0	0	0	0	0	0	0	0	0
1a1a37884d631f000fa2b24e21e7280b	70	0	52	27	0	263	0	0	0	20	30	0	574	0	98	0	0	0	22	0	72	47	43	0	242	0	152	0	111	0	83	0	31	46	43	32	0	89	16	98	59	37	0	0	50	43	69	40	0
697f0545c5251e7ae4b6263f20694c06	0	0	0	0	0	0	0	0	0	0	0	0	0	0	0	0	0	0	0	26	0	0	0	0	0	0	0	0	0	0	0	0	0	0	0	0	0	0	0	0	0	0	0	0	0	0	0	0	0
13e40fe2f5ae679481cd414b4e3ef835	0	0	0	0	0	0	0	0	0	0	0	0	0	0	0	0	0	0	0	0	0	0	0	0	0	0	0	0	0	0	0	0	0	0	0	0	0	0	0	0	0	0	0	0	0	0	0	0	0
600b7987fe59ee5ff67873e9a61ea787	0	0	0	0	0	0	0	0	0	0	0	0	0	0	154	0	0	0	0	0	0	0	0	0	0	0	0	300	0	0	0	0	0	0	0	0	0	0	0	0	0	0	0	0	0	0	0	0	0
31ce3a73ce671acd5220d7e2a6a63d7a	0	27	0	0	0	0	0	0	0	0	0	0	0	0	43	0	0	0	0	0	0	0	0	0	0	0	0	0	0	0	0	0	0	0	0	0	0	0	0	0	0	0	0	0	0	0	0	0	0
32d137477c1ea587a73a51310798fb70	0	0	0	0	0	0	0	0	0	0	0	0	0	0	0	0	0	0	0	0	0	0	0	0	0	0	0	0	0	0	0	0	0	0	0	0	0	0	0	0	0	0	0	37	0	0	0	0	0
42844014f0b8bd2de737c50ba134599b	0	0	0	0	0	0	0	0	0	0	0	0	0	0	0	0	0	0	0	0	0	0	0	0	0	0	0	0	0	0	0	0	0	0	0	0	0	0	0	0	0	0	0	0	0	0	0	0	0
7531a12665a6eb7ca722fca5fc1d9e11	0	0	0	0	0	0	0	0	0	0	0	0	0	0	0	0	0	0	0	0	0	0	0	0	0	0	0	0	0	0	0	0	32	0	0	0	0	0	0	0	0	0	0	0	0	0	0	0	0
4a14b47ac2b159751f122d84558f96a5	17	73	13	274	119	211	8	43	0	48	0	18	68	0	204	38	13	63	48	0	40	206	0	0	310	0	0	17	149	213	0	77	37	182	86	70	117	0	69	66	0	73	131	70	82	353	39	116	0
04a5de657af04f1ee3ec2f35a3009096	0	0	0	0	0	0	0	0	0	0	19	0	0	0	0	0	0	0	0	0	0	0	0	0	0	0	0	0	0	0	0	0	0	0	0	0	0	0	0	0	0	0	0	0	0	0	0	0	0
ae98fc79e59ec075e399f4143addd942	0	0	0	0	0	0	0	0	0	0	0	0	0	0	0	0	0	0	0	0	0	0	0	0	0	0	0	0	0	0	0	0	0	0	0	0	0	0	0	0	0	0	0	0	0	0	0	0	0
30d040ca3bd27e5963293296d0beed90	0	0	0	0	0	0	0	0	0	0	0	0	0	0	0	0	0	0	0	0	0	0	0	0	0	0	0	0	0	0	0	0	367	0	0	0	0	0	0	0	0	0	0	0	0	0	0	0	0
aeeabe5aba672bf68d884df20a7d61ad	0	0	0	0	0	0	0	0	0	0	0	0	0	0	0	0	0	0	0	0	0	0	0	0	0	0	0	0	0	0	0	0	0	0	0	0	0	0	0	0	0	0	0	0	0	0	0	0	0
346b1f5e35dbc54bc8cb831a4785d3b8	0	0	0	0	0	40	0	0	0	0	0	28	0	0	0	0	29	31	0	0	19	0	0	0	0	0	169	0	0	0	105	0	0	0	0	0	269	0	0	0	0	0	0	0	0	166	0	0	0
dec1b7a37c00149ffa7dd549359672f1	0	0	0	0	0	0	0	0	0	0	0	0	0	0	0	0	0	96	0	0	0	0	0	0	0	0	0	0	0	0	0	0	0	0	0	0	0	0	0	0	0	0	0	0	0	0	0	0	0
0aae93614f2f453fa60881991a1fa6b1	0	0	0	0	158	0	0	0	0	0	0	0	0	0	0	0	0	0	0	0	0	0	0	0	0	0	0	0	0	0	0	0	0	0	0	0	0	0	0	0	0	0	0	0	0	0	0	0	0
2257fa0d3c09d858810a38a09d4f8ade	0	25	17	0	0	0	0	0	0	0	0	0	0	0	0	0	0	0	0	57	0	0	0	0	53	0	0	0	0	42	0	0	0	0	0	0	292	0	0	0	17	0	0	0	0	0	0	0	0
9d9abe35d8097547357729f29c9a1ffa	0	0	0	0	0	0	0	0	0	0	0	0	0	0	0	0	0	0	0	0	0	0	0	0	0	0	0	0	0	0	0	0	0	0	0	0	0	0	0	0	0	0	0	0	0	0	0	49	0
4e5fafe1918c4de94c4bcd35714407ce	0	87	158	274	115	511	0	166	640	53	150	21	40	388	243	54	38	172	199	56	61	245	113	30	206	382	6042	82	167	310	2912	97	330	18	119	35	1230	78	46	461	53	140	2280	57	59	278	74	141	23
f8d901e7835058f807eef40901c105af	0	0	0	0	0	0	0	0	0	0	0	0	0	0	0	0	0	0	0	0	0	0	0	0	0	0	0	0	0	0	0	0	0	0	0	0	0	0	0	0	0	0	0	0	0	0	0	0	15
69d8695b9b9a62cf6c23fab01bce7718	0	0	0	0	0	0	0	0	0	0	0	0	0	0	0	0	0	0	0	0	0	0	0	0	0	0	0	0	0	0	0	0	0	0	0	0	0	0	0	0	0	0	0	0	0	0	0	0	0
ff0a14307442bf828aeb980fa0628e05	87	413	0	0	677	17	0	642	0	0	32	0	0	0	0	0	0	0	0	0	0	0	56	0	0	0	3036	0	0	0	646	0	212	0	0	0	128	0	0	176	0	0	1150	0	0	46	0	0	0
692cd71c2de9424a735578bf9c80a5e0	0	0	0	0	0	0	0	0	0	0	0	0	0	0	0	0	0	0	0	0	0	0	0	0	0	0	0	0	0	0	0	0	0	11	0	0	0	0	0	0	0	0	0	0	0	0	0	0	0
d1f497e246001870757a037a0b181a38	0	0	0	0	0	0	0	0	0	0	0	0	0	0	0	0	0	0	0	0	0	0	0	0	41	0	0	0	0	0	0	0	0	0	0	0	0	0	0	0	0	0	0	0	0	0	0	0	0
d1dd4e12576322ae49076a1e4373714e	0	12	0	0	0	0	0	0	0	0	0	0	0	0	0	0	0	0	0	0	0	0	0	0	0	0	0	0	0	0	0	0	0	0	0	0	0	0	0	0	0	0	0	0	0	0	0	0	0
b46c369673d16ce93ef3476ff513ff3a	0	0	15	0	0	14	0	0	0	0	0	0	28	0	9	0	16	0	0	0	0	0	0	21	0	0	0	23	0	0	0	0	72	0	0	0	0	24	0	0	16	0	0	13	0	0	0	0	0
d0ca48e77f888bd7d9074b3fa009d94a	0	0	0	0	0	0	0	0	0	0	0	0	0	0	0	0	0	0	0	0	0	0	0	0	0	0	30	0	0	0	0	0	0	0	0	0	0	0	0	0	0	0	0	0	0	0	0	0	0
92ce41c4f92119ee48392ee7c5745253	0	0	0	0	0	0	0	0	0	0	0	0	0	0	0	0	0	0	0	0	0	0	0	0	0	0	0	0	0	0	0	0	0	0	0	0	0	0	0	0	0	0	0	0	0	0	0	0	0
adbd99ec77cef529a272e5c626800723	23	0	0	32	0	0	0	0	0	0	198	0	0	59	0	34	0	0	80	0	0	31	0	0	0	57	22	804	0	0	44	65	353	0	0	0	147	0	53	222	0	0	0	0	42	0	0	0	0
ff3b435c9224de7ebedfa9f91530f371	0	0	0	0	0	0	0	0	0	0	0	0	0	0	0	0	0	0	0	0	0	0	0	0	0	0	0	0	0	0	0	0	0	0	0	0	183	0	0	0	0	0	0	0	0	0	0	0	0
bad7a7204bc81fd8a7342c107619e1e5	0	0	0	0	0	0	0	0	0	0	0	0	0	0	0	0	0	0	0	0	0	0	0	0	0	0	0	0	0	0	0	0	0	0	0	0	0	0	0	0	0	0	0	0	0	0	0	0	0
6a341aaa6f7dbe6f02fd55186f0214d1	9	13	15	53	25	41	19	16	16	0	39	0	16	37	91	75	0	0	65	22	0	29	54	0	25	29	0	0	15	30	0	18	7	88	13	34	71	31	43	54	35	18	0	25	15	37	28	27	15
fd496fd32dc8c08ade2e8b6c9d8ee13d	0	0	0	0	0	0	0	0	0	0	0	5	0	0	0	40	0	0	0	0	0	0	0	0	0	0	0	0	0	0	0	0	0	0	0	0	0	0	0	0	0	0	0	0	0	0	0	0	0
b68e25f5149c7ebdbcfdd4b07a86ea71	0	0	0	0	0	0	0	0	0	0	0	0	0	0	0	0	0	0	0	0	0	0	0	0	0	0	0	0	0	0	0	0	0	0	0	0	0	0	0	0	0	29	0	53	14	0	0	0	0
63e45d9475c884ced06f2430d4f5be42	0	0	0	0	0	0	83	0	0	0	30	44	0	0	0	0	0	0	86	128	0	0	373	0	442	0	201	0	100	47	416	0	2496	0	0	449	435	0	0	245	0	72	0	0	48	532	0	0	0
0b483609c3522be10ac326aa92b6cf66	0	0	0	0	0	0	0	0	0	0	0	0	0	0	0	0	0	0	0	0	0	0	0	0	0	0	0	0	0	0	0	0	0	0	0	0	0	0	0	0	0	0	11	0	0	0	0	0	0
3fbc4f55f48f35369183a10f9e21e01f	0	0	0	0	0	0	2	0	0	0	0	8	0	0	0	0	0	0	0	0	0	0	0	1	0	0	0	0	0	0	0	0	0	0	0	0	0	0	0	0	0	0	0	0	0	0	0	0	0
c2e06884d460e12316e02ae4f9bf7912	0	0	0	0	0	0	0	0	0	0	0	0	0	0	0	0	0	0	10	0	0	0	0	0	0	0	0	0	0	0	0	0	0	0	0	0	0	0	0	0	0	0	0	0	0	0	0	0	0
cf3f87c226a3c8c4b6f3ebe826c7097d	0	0	0	0	0	0	0	0	0	0	0	0	0	0	0	0	0	0	0	0	0	0	0	0	0	0	61	0	0	0	0	0	0	0	0	0	0	0	0	0	0	0	0	0	0	0	0	0	0
0c61d37efd70cd00879aa3a27e9e1d1f	0	0	0	0	0	37	238	0	60	0	170	0	38	0	9	60	70	0	290	0	0	21	0	60	0	0	8	0	22	59	16	167	2653	0	0	0	114	0	0	93	0	0	0	0	0	23	33	0	0
ceced861f8bbc0e8af8ff0b72671fe94	0	0	0	0	0	0	0	0	0	0	0	0	0	0	0	0	0	0	0	0	0	0	0	0	0	0	0	0	0	0	0	0	0	0	0	0	0	0	0	0	0	0	0	0	0	0	0	0	0
9ae962b24c7869c1f4959d7a28ab2ff8	0	0	0	0	0	0	0	0	0	0	0	0	0	0	0	0	0	0	0	0	0	0	0	0	0	0	0	0	0	0	0	0	0	0	0	0	0	0	0	10	0	0	0	0	0	0	0	0	0
fa3d5a3316496387bd7e3c77f405b285	0	0	0	0	0	0	0	0	0	0	0	0	0	0	0	0	0	0	0	0	0	0	0	0	0	0	0	0	0	0	0	0	0	0	0	0	0	0	0	0	0	0	0	0	0	0	0	0	0
91ba329dfe399fe555db5d571add32cb	0	0	0	0	0	0	0	0	0	0	0	0	0	0	0	0	0	0	0	0	0	0	0	0	0	0	31	0	0	0	0	0	0	0	0	0	0	0	0	0	0	0	0	0	0	0	0	0	0
2be98f5a84d55b79d25d784fa7213718	0	0	0	0	0	0	0	0	0	0	0	0	0	0	0	0	0	0	0	0	73	0	0	0	62	0	0	31	0	0	0	0	0	35	0	0	100	0	0	148	0	0	0	0	0	0	0	0	0
c62e469f15263b86d1f7a566eae27914	0	0	0	0	0	0	0	0	0	0	0	0	0	0	0	0	0	0	0	0	0	0	0	0	0	0	0	0	0	0	0	0	0	0	0	0	0	0	0	0	0	0	0	0	0	0	0	0	0
64ba8358166e884c2e476dc9abe5aafa	0	0	0	0	0	0	0	0	0	0	0	0	0	0	0	0	0	0	11	0	0	0	0	0	0	0	0	0	0	0	0	0	0	0	0	0	0	0	0	0	0	0	0	0	0	0	0	0	0
28b705dc376b09944a39eda685e5feee	0	0	0	0	0	0	0	0	0	0	0	0	0	0	0	0	0	0	0	0	0	0	0	0	0	0	0	0	0	0	0	0	0	0	0	0	0	0	0	0	0	0	0	0	0	0	0	0	0
73332268243d4cd0774113504cd88488	0	0	0	0	0	0	0	14	0	0	0	0	0	0	0	0	0	0	0	0	0	0	0	0	0	0	0	0	0	0	0	0	0	0	0	0	0	0	0	0	0	0	0	0	0	0	0	0	0
00fe32440f405f6b9632ed44146f5213	0	0	0	0	0	0	0	0	0	0	0	0	0	0	0	0	0	0	0	0	0	0	0	0	0	0	0	83	0	0	0	0	0	0	0	0	0	0	0	0	0	0	0	0	0	0	0	0	0
1167d0c17fde37b081f169a6998c1891	0	0	0	0	0	0	127	0	0	0	0	0	0	0	0	0	0	0	0	0	0	0	0	0	0	0	0	0	0	0	0	0	0	0	0	0	0	0	0	0	0	0	0	0	0	0	0	0	0
85a943786bbaf93420ca47ccecc188a6	0	0	0	0	0	0	0	0	0	0	0	0	0	0	0	0	0	0	0	0	0	0	0	0	0	0	0	0	53	0	0	0	0	0	0	0	0	0	0	0	0	0	0	0	0	0	0	0	0
78e792357154fcfbeec4da984c51ada7	0	0	0	0	0	0	0	16	0	0	9	0	0	0	0	42	42	0	0	16	0	0	0	0	0	6	13	13	0	0	0	0	59	0	0	9	20	0	0	13	0	0	0	0	0	0	0	0	0
861bc580266731f22f1184fbe820e3f1	0	0	0	0	23	0	43	0	0	0	0	14	0	0	0	0	0	0	0	0	0	0	0	25	0	0	0	0	0	0	0	0	0	0	0	0	0	0	0	0	0	0	0	0	0	29	0	0	0
96662fdc53c5c68fd9bd70f2bb3f34c8	0	0	0	0	0	0	0	0	0	0	0	0	0	0	0	0	0	0	0	0	0	0	0	0	0	0	0	0	0	0	0	0	48	0	0	0	0	0	0	0	0	0	0	0	0	0	0	0	0
8c0a03aa4972e2badaee4694c7a92624	0	0	0	0	0	0	0	0	0	0	0	0	0	0	0	0	0	0	0	0	0	0	0	0	0	0	26	0	0	0	0	0	0	0	0	0	20	0	0	0	0	0	0	0	0	0	0	0	0
ddf6c308ae0de6e4a5caacf87026026a	46	21	0	78	22	0	0	0	0	0	0	228	0	0	0	0	0	0	0	0	0	78	0	0	59	0	106	0	0	48	0	0	151	0	0	0	34	0	0	0	0	43	0	108	40	25	0	63	0
970e50f56570cd0a318b1be2a8f7557c	0	0	0	0	0	26	0	0	0	0	0	0	0	0	0	0	0	0	0	0	0	0	0	0	0	0	0	0	0	0	0	0	0	0	0	0	0	0	0	0	0	0	0	0	0	0	19	0	0
f411ce9084cc084aa3328e3c792568c5	78	0	0	63	0	0	16	0	0	0	95	0	0	66	0	20	0	0	171	0	0	87	0	0	42	46	93	0	33	42	60	103	0	0	0	117	97	0	62	67	0	91	0	0	54	64	0	71	0
e1fae3875b421d30edf50941986d5b1b	0	0	0	45	0	0	0	0	0	0	884	0	0	125	0	0	0	1202	0	0	0	60	0	0	45	153	0	0	0	0	0	84	0	0	0	0	0	0	137	0	0	0	0	0	0	0	0	0	0
18b5cb92fe4be368e12542bae34283a2	0	0	0	0	0	0	0	0	0	0	0	0	0	0	0	0	0	0	0	0	0	0	0	0	0	0	0	0	0	0	0	0	0	0	0	0	0	0	0	0	0	0	0	0	0	0	0	0	0
41b60b470002fdf7e0c9747f97bf8311	0	0	0	0	0	0	0	0	0	0	0	0	0	0	0	0	0	0	0	25	0	0	0	0	0	0	0	0	0	0	0	0	0	0	0	0	0	0	0	0	0	0	0	0	0	0	0	0	0
e97cec415938dcfbc4e7f7abba210a32	0	0	0	0	0	0	0	0	0	0	0	0	0	0	0	0	0	0	0	0	0	0	0	0	0	0	0	0	0	0	0	0	0	0	0	0	0	0	0	0	0	0	0	0	0	0	0	0	0
c8400cd942018b5fc0fd13f30a65f1ca	0	0	0	0	0	0	0	0	0	0	0	0	0	0	0	0	0	0	0	0	28	0	0	0	0	0	0	0	0	0	0	0	0	0	0	0	0	0	0	0	0	0	0	0	0	0	0	0	0
3be65516a9dbb35495528891d81c29c9	0	0	0	0	0	0	0	0	0	0	0	0	0	0	0	0	0	0	0	0	0	0	0	0	0	0	26	0	0	0	0	0	0	0	0	0	0	0	0	0	0	0	0	0	0	0	0	0	0
9e701e82d552ee66d9007fa3883b6560	0	0	0	0	0	0	0	0	0	25	0	0	0	0	0	0	0	0	0	0	0	0	0	0	0	0	0	0	0	0	20	26	0	0	0	0	151	0	28	0	0	0	171	0	0	0	0	0	0
f8e758878babbea3872e1f78017d9939	0	0	0	0	0	0	0	0	0	0	0	0	0	0	0	0	0	0	0	0	0	0	0	0	0	0	0	0	0	0	22	0	0	0	0	0	0	0	0	0	0	0	0	0	0	0	0	0	0
f1833b0a22cb4ecb5490b645805429a4	0	0	0	0	0	0	0	0	0	0	0	0	0	0	0	17	0	0	0	0	0	0	0	0	0	0	0	0	0	0	0	0	0	0	0	0	0	0	0	0	0	0	0	0	0	0	0	0	0
7bfffed40915f7a9d3fdaeec832b0823	1456	167	74	339	132	132	188	91	247	0	387	0	136	413	212	162	54	21	801	188	695	261	0	0	79	172	196	183	89	349	241	379	1497	142	0	182	1300	204	114	1396	304	247	184	304	194	82	65	81	75
5f68686c067eed4a427f69292bf75d1f	0	0	0	0	0	0	0	0	0	0	0	0	0	0	0	0	9	0	0	0	0	0	0	0	0	0	0	0	0	0	0	0	0	42	0	0	0	0	0	0	0	0	0	0	0	0	0	0	69
d3ebb051dac9affb2788cc01a593b2e2	68	7385	0	50	8476	143	1249	603	0	49	0	5	0	319	0	197	0	10	103	0	152	41	0	211	115	65	2304	0	201	225	1237	323	151	0	146	0	20	0	41	929	0	392	32	0	235	358	25	9	0
67da8557b100df3e1f5528936a4b83cc	0	0	0	0	0	0	0	0	0	0	0	0	0	0	0	0	0	0	0	0	0	0	0	0	0	0	0	0	0	0	0	0	0	0	0	34	0	0	0	0	0	0	0	0	0	0	0	0	0
184c452038fe97480a1f3300f90afe9f	0	0	0	0	0	0	0	0	0	0	0	0	0	0	0	0	0	0	0	0	0	0	0	0	0	0	0	0	0	0	0	0	0	0	0	0	0	0	0	0	0	0	0	0	0	0	0	0	0
ddbee142ab87385de183b235d50f9173	0	0	0	14	0	0	0	0	0	0	0	0	0	0	0	0	0	0	0	0	0	0	0	0	0	0	0	0	0	0	0	0	0	0	0	0	0	0	0	0	0	0	0	0	0	0	0	0	0
a8eb5bcd2e6c55cba57a4feac174f171	0	0	0	0	0	0	0	0	0	0	0	0	0	0	0	71	0	0	0	0	0	0	0	0	0	0	0	0	0	0	0	0	0	0	0	0	0	0	0	0	0	0	0	0	0	0	0	0	0
ffc8d9ea430d80957abae827661fd97c	0	0	0	0	0	0	0	0	0	0	0	0	0	0	0	0	0	0	0	0	0	0	0	0	0	0	0	0	0	0	0	0	0	0	0	0	0	0	0	0	0	0	0	0	0	0	14	0	0
90e4dac068ce3dc16119d507be1d3e51	168	5453	0	0	6323	151	80	100	0	0	362	0	0	0	0	110	0	0	75	0	0	0	0	0	0	0	0	0	0	160	0	78	58	622	0	95	275	0	94	179	0	2840	0	0	802	260	0	0	0
be23c0e10ef6f54b507d0c0985fff5ad	0	0	0	0	0	0	0	0	0	0	0	0	0	0	0	0	0	0	0	0	0	0	54	0	0	0	0	0	0	0	0	0	0	0	0	0	0	0	0	0	0	0	0	97	0	0	94	0	0
ac1d9b700125db98b6bcbccf3300df36	0	0	0	0	0	0	0	0	0	0	0	0	0	0	0	0	0	0	0	0	118	0	0	0	0	0	0	0	0	0	0	0	0	0	0	0	0	0	0	0	0	0	0	0	0	0	0	0	0
4a4d808010d161b45c71b59a0e4d4b24	0	0	0	0	0	0	0	0	0	0	0	0	0	0	0	0	87	0	0	0	0	0	0	16	0	0	0	132	0	0	0	0	0	0	0	0	0	0	0	0	0	0	0	402	0	0	0	0	0
5ccdc2fab8430ae906d3f5d14ef8c137	56	617	214	126	591	330	534	625	217	238	0	109	717	772	445	278	182	123	96	501	217	90	330	174	269	430	101	567	250	20	184	65	52	129	467	67	100	302	72	202	290	69	0	390	39	53	190	56	206
a9be1d9fa7604246a848123506f7b9b9	0	0	0	0	0	0	0	0	0	0	0	0	0	0	0	0	0	0	0	0	0	0	0	0	0	0	0	0	0	83	0	0	0	0	0	0	0	0	0	0	0	0	0	0	0	0	0	0	0
20435dfff821e35ef77b06ac2b5c7816	0	15	0	0	0	0	0	0	0	0	0	0	0	0	0	0	0	0	0	0	0	0	0	0	0	0	0	0	0	0	0	0	0	0	0	0	0	0	0	0	0	0	0	0	0	0	0	0	0
34b68c11227ebbca3f3caf59033c30b6	0	0	0	0	0	0	0	0	0	0	26	0	0	0	0	0	0	0	0	0	0	0	0	0	0	0	0	0	0	0	0	0	0	0	0	0	0	0	0	0	0	0	0	0	0	0	0	0	0
f0a1bd7ebfe93ea2f69f076800788c74	0	104	0	0	89	49	50	21	0	0	0	0	0	0	0	0	0	0	0	0	0	0	0	68	0	0	50	13	0	0	0	0	224	0	0	10	73	0	0	21	0	0	186	0	0	36	0	0	0
c62e9800358fbe001094d5b4f6af665e	0	0	0	0	0	0	0	0	0	3	0	0	0	0	0	0	0	0	0	0	0	0	0	0	0	0	0	0	0	0	0	50	0	25	5	0	0	0	0	0	0	0	25	0	0	0	0	0	0
93493a0fdc64f6f4b790dc86670be3ed	0	0	0	0	0	0	0	0	0	0	0	0	0	0	0	0	0	0	0	0	0	0	0	0	0	0	0	0	0	0	0	0	0	0	0	0	0	14	0	0	0	0	0	0	0	0	0	0	0
1981e6a88d3481af3228039e51ed1109	0	0	34	388	0	449	0	0	0	0	0	0	0	0	0	0	72	0	0	0	0	265	0	0	0	0	59	111	0	0	0	0	0	0	0	0	0	0	0	0	0	0	0	0	0	0	27	0	0
f14aa3ee7a2a2b38728f95f48974a337	0	0	0	0	0	0	0	0	0	0	0	0	0	0	0	0	0	0	0	0	0	0	0	0	0	0	0	0	0	0	0	0	0	0	0	0	0	0	0	0	0	0	0	0	0	0	0	0	0
03654d0cf97117162914aca9a07cc597	0	0	0	20	0	26	64	0	0	80	27	0	0	21	0	131	58	0	49	113	93	20	0	16	56	19	0	0	181	63	0	56	0	99	150	0	0	0	15	0	0	55	108	0	33	0	0	0	0
07ac87c971cdac7ccdfefc9f6a2afd40	0	0	0	0	0	0	0	0	0	0	0	0	0	0	0	0	0	0	0	0	25	0	0	0	24	0	0	0	0	0	0	0	0	0	0	0	0	0	0	0	0	0	0	37	0	0	0	19	0
6354c80f692e6afaaea88fe8b8c71330	0	0	0	0	0	0	0	0	0	0	0	0	0	9	0	0	0	0	0	0	0	0	0	0	0	0	0	0	0	0	0	0	0	0	0	13	0	0	0	0	0	0	0	0	0	25	0	0	0
09bf60713d50bff0f8ca14503cd9e359	0	0	0	180	0	5	6	8	7	0	0	0	0	0	0	20	0	0	0	4	0	146	5	0	6	0	3	0	0	0	5	0	0	0	0	10	47	5	0	0	14	0	0	0	0	0	0	0	0
17c85117aab27344704f6492c9db953a	0	0	0	0	0	0	0	0	0	0	0	0	0	0	0	0	0	0	0	0	0	0	38	0	0	0	0	0	0	0	0	0	0	0	0	0	0	0	0	0	0	0	0	0	0	0	0	0	0
c69a4edab17638280298bef518303a65	0	0	0	0	0	0	0	0	0	0	1	0	0	0	58	0	0	0	0	0	0	0	0	0	0	0	0	0	0	87	0	0	0	0	0	0	0	0	0	0	0	0	0	0	0	0	0	0	0
3860084f26ff13e5bdb350e8ac496a5b	17	197	0	0	196	0	0	59	52	0	0	0	0	0	0	0	0	0	0	97	0	0	0	189	0	0	72	0	0	0	100	0	833	68	0	0	243	0	0	50	0	0	0	0	0	0	0	0	0
7e3bc6b0aed258a7ff4bd608aa265010	0	0	0	0	0	0	0	0	0	0	0	0	140	0	0	0	0	0	0	0	0	0	0	0	0	0	0	0	0	0	0	0	0	0	0	0	0	0	0	0	0	0	0	0	0	0	0	0	0
56d3a57bfaef4c4926638ab1fcf01838	0	0	0	0	0	0	0	0	0	0	0	0	0	0	0	0	0	0	0	0	0	0	0	0	0	0	0	0	0	0	0	0	0	0	0	0	0	0	0	0	0	0	0	0	0	0	0	0	0
c4507e1282697ddce1232547dfaba576	0	0	0	0	0	0	0	0	0	0	0	0	0	0	0	0	0	0	0	0	0	0	0	0	0	0	0	0	0	0	0	0	0	0	0	0	0	0	0	0	0	0	0	39	0	0	0	0	0
e865c414bd7ca95630be916d7b3d68e4	21	152	0	0	200	69	178	314	20	318	179	0	0	75	0	72	222	348	0	16	0	0	203	36	35	71	759	0	735	185	95	46	37	0	521	30	0	17	117	270	0	273	0	0	96	172	15	303	0
acc827070dd5a98d4f42631b427a80f9	0	0	0	0	41	0	0	11	0	0	0	0	0	0	0	0	0	0	0	0	0	0	0	0	0	0	0	0	0	0	0	0	0	0	0	0	0	0	0	0	0	0	0	0	0	0	0	0	0
b26ab3e6598f1303ae9e8529a6e563cd	0	0	0	0	0	0	0	0	0	0	0	0	0	0	0	0	0	0	0	0	0	0	0	0	0	0	0	0	0	0	0	0	0	0	0	0	0	0	0	0	0	0	0	0	0	0	0	0	0
dec03986f7149723ce19e792aff7b9b2	39	0	0	0	0	0	0	0	0	0	0	0	0	0	0	0	0	0	0	0	0	0	0	0	0	0	0	0	0	0	0	0	0	0	0	0	0	0	0	0	0	0	0	0	0	0	0	0	0
14a05cb9a123d6be20c47605131beee4	133	797	217	355	767	356	0	429	1020	177	108	19	421	533	1059	259	455	151	430	1287	248	180	745	352	1175	486	504	436	464	128	456	254	192	1202	419	197	351	862	285	1147	830	200	727	1309	187	932	482	236	443
47d03c8844796fd9a908794dde04635c	0	0	0	0	0	0	0	0	0	0	0	0	0	0	0	0	0	0	11	0	0	0	0	0	0	0	0	0	0	0	0	0	0	0	0	0	0	0	0	0	0	0	0	0	0	0	0	0	0
8860b21e728642e2209eae1a8c1ab4bb	0	0	0	0	0	0	0	0	0	0	0	0	0	0	0	0	0	0	0	0	0	0	0	0	0	33	0	0	0	0	0	0	0	0	0	0	0	0	0	0	0	0	0	0	0	0	0	0	0
f60ab4f782963e9fd4b5a075d45a1e8f	0	0	0	0	0	0	0	0	0	0	0	0	0	0	0	0	0	0	0	0	0	14	0	0	0	0	0	0	0	0	0	0	0	0	0	0	0	0	0	0	0	0	0	0	0	0	0	0	0
f8195cdb2ee47098773f7406278d2f28	193	235	136	0	444	113	24	298	137	0	90	0	77	7	71	0	405	20	67	247	88	0	248	220	0	8	800	508	12	0	374	11	1090	277	26	39	89	27	62	180	18	33	274	27	24	194	114	0	8
b81651040ceba90ccedac04019c3cf84	0	0	0	0	0	0	0	0	0	0	0	0	0	0	0	0	0	0	0	0	0	0	0	0	0	0	0	0	0	0	0	0	0	0	0	36	0	0	0	0	0	0	0	0	0	0	0	0	0
1b9515f642889a578f2f5d6cb95b5b17	0	0	0	0	0	33	0	0	0	0	0	0	0	0	0	0	0	0	0	12	0	0	0	0	0	0	0	43	0	0	0	0	0	0	0	0	0	0	0	0	0	0	0	0	0	0	0	0	0
f51ea10384e2671904484b22e4242d0f	0	27	11	0	25	0	0	297	12	0	0	0	32	0	0	0	87	0	0	0	0	0	0	17	0	0	0	0	0	0	0	0	0	0	0	0	0	0	0	0	5	0	0	0	0	0	17	0	0
1355917d95cf6e5b15146c17fb17ded5	0	0	0	0	0	0	0	0	0	0	0	0	0	0	0	0	0	0	0	0	0	0	0	0	0	0	0	0	0	0	0	0	0	0	0	0	0	0	0	0	0	0	0	0	0	0	0	0	0
57c992d9f324823ccd5046cb8645189f	0	5	1	0	2	25	0	313	0	0	0	126	39	0	30	220	0	0	0	0	0	0	7	0	0	0	0	0	0	0	0	0	0	121	0	0	43	23	0	0	0	0	0	60	0	32	0	0	17
8840805274fbbe403ece9d68248faafe	0	0	0	0	0	0	0	0	0	0	0	0	0	0	0	0	0	0	0	0	0	0	0	0	0	0	0	0	0	0	0	0	0	0	0	0	0	0	0	0	0	0	0	0	0	0	0	0	0
824a2fa9ff2e2af4ced8c7c5aca2d327	16	0	0	0	0	0	0	0	0	0	0	0	0	0	0	0	0	0	0	0	0	0	0	0	0	0	0	0	0	0	0	0	0	0	0	0	0	0	0	0	0	0	0	0	0	0	0	0	0
bb26597f928f52eb07a8e4684f903d61	53	0	48	323	0	5830	0	0	0	0	0	0	25	0	0	0	0	0	62	63	0	361	27	21	575	0	1369	0	0	30	2019	0	0	0	0	54	1648	68	0	1176	52	44	785	0	19	0	151	105	1849
61f1249b29904143df5424c379d6d242	0	0	0	0	0	0	0	0	0	0	0	0	0	0	0	0	0	0	0	0	0	0	0	0	0	0	0	0	0	0	0	0	0	0	0	0	0	0	0	0	0	0	0	0	0	0	0	0	0
26c298b73deef6898a2c8823a62ae7e7	0	0	0	0	0	0	0	0	0	0	0	0	0	0	0	0	0	0	0	453	0	0	0	0	0	0	0	0	0	0	0	0	0	0	0	0	0	0	0	0	0	0	0	0	0	0	0	0	0
f01f9389d0a3d908657800aa3d4c4ff9	0	0	0	0	0	0	0	0	0	0	0	0	0	0	0	0	0	0	0	0	0	0	0	0	0	0	0	0	0	0	0	0	0	0	0	0	0	0	0	0	0	0	74	0	0	0	0	0	0
f07c1ce97105a611fc0037618d38d226	0	0	0	0	0	0	0	0	0	0	0	0	0	0	0	0	0	0	0	0	0	0	0	0	0	0	0	0	0	0	0	0	80	0	0	0	0	0	0	0	0	0	0	0	0	0	0	0	0
a69b85402a97a504924906239d2a8f29	0	0	0	0	0	0	0	0	0	0	0	0	0	0	0	0	0	0	0	0	0	0	0	0	0	0	0	0	0	0	10	0	0	0	0	0	0	0	0	0	0	0	0	0	0	0	0	0	0
540e04eb50350920063f25b701d7308d	0	0	0	0	0	0	0	0	0	0	0	0	0	0	0	0	0	0	0	0	0	0	0	0	0	0	0	0	0	0	0	0	0	0	0	0	0	0	0	0	0	0	0	0	0	0	0	0	0
ffdfdc6e17ee602ccf3a47a13218d69d	0	0	0	0	0	0	0	0	0	0	0	0	0	0	1100	0	0	0	0	0	0	0	0	0	0	0	0	0	0	0	0	0	0	1095	0	0	0	0	0	0	0	0	0	433	0	0	0	0	0
86c321f2176144d24a5717ecf93531e2	0	0	0	0	0	0	0	0	0	0	0	0	0	0	0	0	0	0	0	0	0	0	0	0	0	0	0	0	0	0	0	0	0	0	0	0	0	547	0	0	0	0	0	0	0	0	0	0	0
b9c60d823e4674a3db57af4a231bd28c	0	0	0	0	0	0	0	0	0	92	0	0	0	0	0	0	0	0	0	0	0	0	0	66	0	0	0	0	145	0	0	0	0	0	119	0	0	0	0	0	0	0	0	0	0	0	0	0	0
b54d81dd70e860f51a9f54df662c97c5	0	0	0	0	0	0	0	0	0	0	0	0	0	0	0	21	0	0	0	0	0	0	0	0	0	0	7	0	0	0	0	13	0	0	0	0	0	12	0	50	21	0	0	0	0	0	0	0	0
6f3f68e5c8e2a11b388ddbbea9fa182d	0	0	0	0	0	61	0	0	17	0	0	0	0	0	0	154	3	5	10	8	0	0	0	13	0	0	0	0	27	0	0	0	0	18	0	0	0	0	0	0	0	72	143	0	7	6	0	12	0
364bc119379a700a23c543ba62b91e46	11	444	8	20	503	8	326	23	9	185	222	0	0	102	13	32	62	109	32	15	664	17	339	54	129	61	109	0	230	16	57	103	9	10	295	41	239	38	109	374	26	125	123	26	85	879	24	274	0
049f5a7ad90cb850bb8c8b51d31ca3a6	0	0	31	0	0	0	0	107	0	0	0	0	0	0	0	0	0	0	0	0	0	0	0	11	0	0	0	0	0	0	0	0	0	0	0	0	22	117	0	0	86	0	0	0	0	0	0	0	0
3527a821bae7249a0a273ece17628632	0	0	0	0	0	0	0	0	0	0	0	0	40	0	0	0	0	0	0	0	0	0	0	0	0	0	0	0	0	0	0	0	0	0	0	0	0	0	0	0	0	0	0	0	0	0	0	0	0
1fc4fdde88adfbd6cfe757aac629e77c	0	0	0	60	0	0	0	0	0	0	0	0	0	0	0	0	0	0	0	0	0	0	0	0	0	0	0	0	0	0	0	0	0	0	0	0	0	0	0	0	0	0	0	0	0	0	0	0	0
8b4e12a77dffe0d02c4839739e2dcd48	0	55	0	0	0	0	0	0	0	0	0	0	0	0	0	0	0	0	0	0	0	0	0	0	0	0	0	0	0	0	0	0	0	0	0	0	0	0	0	0	0	0	0	0	0	0	0	0	0
272ae64b2f8f40bbb85fffd4d6228749	0	0	0	0	0	0	0	0	0	0	0	0	0	0	0	0	0	0	0	0	0	0	0	0	0	0	0	0	0	0	0	0	0	0	0	0	0	0	0	0	0	0	0	0	0	0	0	0	0
bd3a53e05f11959dbc86de0efd3442e8	12	0	1010	1680	0	3342	1039	849	2607	783	1034	475	0	824	7194	111	539	9708	514	0	33053	1631	785	4520	625	619	6084	23	1363	290	4248	635	76	2876	1463	246	253	6581	1883	861	5678	163	1	0	118	622	836	284	0
e96d37b2625192abe252d9e4b2547a0f	0	0	0	0	0	0	0	0	0	0	0	0	0	0	0	0	0	0	0	0	0	0	0	0	0	0	0	0	0	0	0	0	0	0	0	0	0	0	0	0	0	0	0	0	0	0	0	0	0
29a12368ff269624801db66b01aeac5c	0	0	0	33	0	0	0	0	0	0	0	0	0	0	0	0	0	0	0	0	0	0	0	0	0	0	0	0	0	0	0	0	0	0	0	0	0	0	0	0	0	0	0	0	0	0	0	0	0
97c5dff8766ba3e03564bb823ccb0948	0	0	0	0	0	0	0	0	0	0	0	0	0	0	0	0	0	0	0	0	0	0	0	0	0	0	51	0	0	0	0	0	0	0	0	0	0	0	0	0	0	0	0	0	0	0	0	0	0
05a500ea8a0fda0427907bb9d832b213	57	217	0	1969	240	0	0	0	0	176	45	0	0	0	0	0	0	0	188	61	0	1465	288	0	0	0	399	0	144	43	953	0	217	0	213	0	0	0	0	0	0	1013	0	0	494	183	0	141	0
887136235829d2965455588ce7d3e838	0	0	0	0	0	0	0	0	0	0	0	0	0	0	0	0	0	0	0	0	0	0	0	0	0	0	0	0	0	0	0	0	0	0	0	0	0	0	0	172	0	0	0	0	0	0	0	0	0
1ff3b31d754ce38a814dc2970543c7c4	0	0	0	0	0	0	0	0	0	0	0	0	0	0	0	0	0	0	0	0	0	0	0	0	0	0	0	0	0	0	0	0	0	0	0	0	54	0	0	0	0	0	0	0	0	0	0	0	0
584426860674b0b5b98fba6ce447f8ab	0	0	0	0	54	0	0	0	0	0	0	0	0	0	0	0	0	0	0	0	0	0	0	0	0	0	0	0	53	0	0	0	0	0	0	0	54	0	0	0	0	0	0	0	0	0	0	0	0
e8746b469018f6f6f0c9c91803608e27	0	0	130	187	0	112	223	0	61	0	420	41	25	73	578	57	0	0	440	79	63	129	180	52	143	52	252	241	0	43	433	126	1077	92	49	73	98	126	55	180	145	172	0	0	191	0	0	0	0
575ad6a7e62502ee79cb0cca7ac9e8b5	0	0	0	0	0	0	0	0	0	0	0	0	0	0	0	0	0	0	0	0	0	0	0	0	0	0	0	0	0	0	0	0	0	0	0	0	0	0	0	0	0	0	0	0	0	0	0	0	0
bf8b8c9e82e28e40a9901ff361718b6e	109	0	0	0	0	0	0	0	0	0	0	0	0	0	0	0	0	0	0	0	0	0	0	0	0	0	0	0	0	0	0	0	0	0	0	0	0	0	0	0	0	0	0	0	0	0	0	0	0
e2cb722a15e9d8d437ca7f72d2d08ba2	0	0	0	0	0	13	0	0	0	0	0	0	0	0	0	0	0	0	0	0	0	0	0	0	0	0	0	0	0	0	0	0	0	0	0	0	0	0	0	0	0	0	0	0	0	0	0	0	0
7629db98312e5281bee9384cb907a121	0	0	0	0	0	0	0	0	0	0	0	0	0	0	0	0	0	0	0	0	0	0	0	0	0	0	150	0	0	0	0	0	0	0	0	0	0	0	0	0	0	0	0	0	0	0	0	0	0
dbcfeb562d9596801d1c2d67b07904c9	0	0	0	0	0	0	0	0	0	0	0	0	0	0	0	0	0	0	0	0	0	0	0	0	0	0	0	0	0	0	0	0	0	0	0	0	270	0	0	0	0	0	66	0	0	0	0	0	0
df08c2ef984d6751ae78282bbe6246cf	0	0	0	5	0	12	13	0	0	0	0	0	28	0	0	15	0	0	0	10	25	33	0	0	0	0	0	0	0	7	0	7	0	0	0	0	0	20	0	0	0	11	0	7	0	0	10	25	0
39ee468555504fc165dc12b022dc971a	26	0	0	0	0	0	0	0	0	0	0	0	0	0	0	0	0	0	0	0	0	0	0	0	0	0	0	0	0	0	0	0	0	0	0	0	0	0	0	0	0	0	0	0	0	0	0	12	0
ecc40489111e53b8e9381e771eec4df7	0	0	0	0	0	0	0	0	0	0	0	0	0	0	0	0	0	0	0	0	0	0	0	0	0	0	0	0	0	0	0	0	0	0	0	0	0	0	0	0	0	0	0	0	0	0	0	0	0
bb32d53acf50af1fbb9a78cb75356997	331	2727	0	4664	3669	3143	2332	1163	1692	110	1594	439	0	1259	4245	413	0	486	1679	0	0	4441	0	1014	794	651	0	0	200	2099	124	3376	82	1389	150	2704	1148	833	2099	0	865	3449	117	3078	3008	233	844	1253	0
3ab72a5e30215acce2f0a7b22d3a8bed	0	0	0	0	0	0	0	0	0	0	0	0	0	0	0	0	0	0	0	0	0	0	0	0	0	0	0	23	0	0	0	0	0	0	0	0	0	0	0	0	0	0	0	0	0	0	0	0	0
799e5f85cf28a8bd2b7f7108f245aa12	0	0	0	0	0	0	0	0	0	0	0	0	0	0	0	0	0	0	0	0	0	0	0	0	0	0	0	0	0	0	0	0	0	0	0	0	14	0	0	0	0	0	0	0	0	0	0	0	0
8c87852aaa6cfe30fe2ef1f212a566b0	0	0	0	0	0	0	0	0	0	0	0	0	0	0	0	0	0	0	0	0	0	0	0	0	0	0	0	0	0	0	0	0	0	0	0	0	0	0	0	0	0	0	0	0	0	0	0	0	0
8792af7434c1e01e3847764771898684	0	0	0	0	0	0	0	0	0	0	0	0	0	0	0	0	0	0	0	0	0	0	0	0	0	0	0	0	0	0	0	0	0	0	0	0	0	0	0	0	23	0	0	0	0	0	0	0	40
a2dc0fa16cbbf00a6005ad5b8649c8f1	0	0	0	59	0	0	0	0	0	0	0	0	0	0	0	0	0	0	0	0	0	37	0	0	0	0	0	0	0	0	0	25	0	24	0	0	0	0	0	0	0	0	0	0	0	0	0	0	0
2a6472e82ff0a6b161b7c7e076c75a7e	0	0	0	0	0	0	0	0	0	0	0	0	0	0	0	0	0	0	0	0	0	0	0	0	170	0	0	0	0	0	0	0	0	0	0	0	0	0	0	0	0	0	0	0	0	0	0	0	0
1fa52d8f7af8419f90fca8769f37b65f	496	0	0	0	278	0	0	0	0	0	0	0	0	0	0	0	0	0	256	0	0	94	0	0	0	0	0	0	0	0	0	0	2853	0	0	0	255	0	0	0	0	0	100	0	0	0	155	0	0
136378c249dddc002d702ab879cbc63f	0	0	0	108	0	0	0	0	0	0	0	0	0	0	0	0	0	0	0	0	0	82	37	0	0	0	0	190	0	0	0	0	0	0	0	0	0	19	0	0	17	0	0	0	0	0	0	0	0
aabde14e9aa256177da7814c90611ef7	0	0	0	0	0	0	0	0	0	0	0	0	0	0	0	0	0	0	0	0	0	0	0	0	0	0	0	0	0	0	0	0	0	0	0	0	0	0	0	0	0	0	0	0	0	0	0	0	0
a1502b8d03784fe8c28f578e849a0162	0	0	0	0	0	0	0	0	0	0	0	0	0	389	0	0	0	0	0	0	0	0	0	0	0	0	0	0	0	0	0	0	0	0	0	0	0	0	0	0	0	0	0	0	0	0	0	0	0
fcd2193c748ad9e7608a175991498615	0	0	135	0	0	0	0	0	0	0	0	0	0	0	0	0	0	0	0	0	0	0	0	0	0	0	0	0	0	0	0	0	0	0	0	0	0	0	0	0	0	0	0	0	0	0	0	0	0
a434231a990d28d5da01eef0f5941b36	0	0	0	0	0	0	0	0	0	0	0	0	32	0	0	0	0	0	0	0	0	0	0	0	0	0	0	0	0	0	0	0	0	0	0	0	0	0	0	0	0	0	0	0	0	0	0	0	0
6ed0b5849687ab142ec4f14f699cb2e0	0	0	0	0	0	0	0	0	16	0	0	0	0	0	0	0	0	0	0	0	0	0	0	0	0	0	0	0	0	0	0	0	0	0	0	0	0	0	0	0	0	0	0	29	0	0	0	0	0
3133f31b22007df99f3471334aa2e900	0	0	0	0	0	0	0	0	0	0	0	0	65	0	0	0	0	0	0	0	0	0	0	0	0	0	0	0	0	0	0	0	0	0	0	0	0	0	0	0	0	0	0	0	0	0	0	0	0
66eb9dac3e46f365e783d1df80204893	0	0	0	0	0	0	0	0	0	0	0	0	10	0	0	0	0	0	0	0	0	0	0	13	0	0	0	0	0	0	0	0	0	0	0	0	0	0	0	0	0	0	0	0	0	0	0	0	0
7589ed3eb6330f9979642890b25917c7	0	0	0	0	0	0	0	0	0	0	0	0	0	0	0	0	0	0	0	0	0	0	0	0	0	0	0	67	0	0	0	0	0	0	0	0	0	0	0	0	0	0	0	0	0	0	0	0	0
2de26f96d16803e596bc46f3c40c2ddd	0	43	0	0	29	0	0	0	0	0	0	0	0	0	0	0	0	0	0	0	0	0	0	0	0	0	0	0	0	0	0	0	0	0	0	0	0	0	0	0	0	0	0	0	0	0	0	0	0
24f801e05073341504a16521f313ded8	0	0	0	0	0	0	0	0	0	0	0	0	0	0	0	0	12	0	0	0	0	0	0	0	0	0	0	0	0	0	0	0	0	0	0	0	0	0	0	0	0	0	0	0	0	0	0	0	0
f64ae8ad49d3c1e7c56f1fb5f02fac12	12	37	7	0	0	0	0	0	0	0	0	0	0	0	0	0	0	0	0	0	0	0	0	0	0	0	0	0	0	0	0	0	0	34	0	0	36	0	0	137	0	0	0	0	0	0	0	0	0
394d4d2569558e3d9bced8e52869535a	0	0	0	0	0	0	0	0	0	0	0	0	0	0	0	0	0	0	0	0	0	0	0	0	0	0	0	0	0	0	0	0	0	0	0	0	0	0	0	0	0	0	0	0	0	0	0	0	140
84dd6c39ffa3df02ea169c387d30873d	0	0	0	0	66	0	0	0	0	0	0	0	0	0	0	0	0	0	0	0	0	0	0	0	0	0	0	0	0	0	0	0	0	0	0	0	0	0	0	0	0	0	0	0	0	0	0	0	0
028b1d75b22b273f68f3ea85ab58cab4	0	0	0	0	0	0	0	0	0	0	0	0	0	0	0	0	0	0	0	0	0	0	0	0	0	0	0	0	0	0	0	0	0	17	0	0	0	17	0	0	0	0	0	0	0	0	0	0	0
5fe8e445b0f6c9284ac9a94338cc715c	0	0	0	0	0	0	0	0	0	0	0	0	0	0	0	0	0	0	0	0	0	0	0	0	0	0	0	0	0	0	0	0	0	0	0	0	0	0	0	0	0	0	0	0	0	0	0	0	0
9328e13efff2bf2581d14a68bb765858	0	0	0	0	0	0	0	0	0	0	0	0	0	0	0	0	0	0	0	0	0	0	0	0	0	0	71	0	0	0	75	0	0	0	0	0	0	0	0	0	0	0	0	0	0	0	0	0	0
edbc219134f8f3d844e377e6519d7bfc	128	0	200	0	0	185	31	31	0	17	0	0	32	0	112	40	0	0	95	32	20	0	0	0	92	0	0	0	109	0	0	95	325	187	66	0	363	62	0	142	86	86	52	0	60	51	30	46	111
ac97aa83a9cc76c1f185a25451d33d14	0	0	0	0	5	0	0	25	0	0	0	0	15	0	0	0	0	0	0	0	0	0	0	0	0	0	0	16	0	0	0	0	0	0	0	0	0	0	0	0	0	0	0	0	0	0	0	0	0
cfd7120fcd92e663c4e45ded4ec9822f	0	0	0	0	0	0	0	0	47	0	0	0	0	0	0	0	0	0	0	0	0	0	0	0	0	0	0	0	0	0	0	0	0	0	0	0	0	0	0	0	0	0	0	0	0	0	0	0	0
b78d83574ee009441453707b6100e372	0	0	0	0	0	36	0	0	0	0	0	0	0	0	0	0	0	0	0	0	0	0	0	0	0	0	0	0	0	0	0	0	0	0	0	0	0	0	0	0	0	0	0	0	0	0	0	0	0
245d52f1bae30531f81ab6b253d97eef	0	215	0	236	239	0	0	0	0	0	113	0	18	144	24	123	0	461	0	82	0	125	39	25	96	108	0	0	0	185	0	165	0	55	0	0	0	0	199	49	0	154	0	11	116	0	0	51	0
6d47065de6f1c3cbdd7c0f7b1f07b407	0	0	0	0	0	0	0	0	0	0	0	0	0	0	0	0	0	0	0	0	0	0	0	0	0	0	0	0	0	0	0	0	0	0	0	0	0	0	0	0	0	0	0	0	0	32	0	0	0
eaaae1c58708bb77026bfaad1b714caa	0	0	0	0	0	0	0	0	0	0	0	0	0	0	0	0	0	0	0	0	0	0	0	0	0	0	0	0	0	0	0	0	37	0	0	0	0	0	0	0	0	0	0	0	0	0	0	0	0
16a7aa577bf7c19b671883b571e68e4d	0	0	0	0	227	0	0	0	0	0	0	0	0	0	0	0	0	0	0	0	0	0	0	0	0	0	0	0	0	0	0	0	0	0	0	0	0	0	0	0	0	0	0	0	0	0	0	0	0
07bd24636e14d89e5b6e190efb90725c	0	0	0	0	0	0	0	0	0	0	0	0	0	0	0	0	0	0	0	0	0	0	0	0	0	0	0	0	0	0	0	0	0	0	0	0	0	0	0	0	0	0	0	0	0	0	0	0	0
1efe141d24c65520125b669681ab0847	0	0	0	0	0	0	0	0	0	0	0	17	0	0	0	0	0	0	0	0	0	0	0	0	0	0	0	0	0	0	0	0	0	0	0	0	0	0	0	0	0	0	0	0	0	0	0	0	0
4f7f2f1d9eb118d9479eb4bc0e9aa2d9	0	0	0	0	0	0	0	0	0	0	0	0	0	0	0	0	0	0	0	0	111	0	0	0	0	0	0	0	0	0	0	0	0	0	0	0	0	0	0	0	0	0	0	0	0	0	0	0	0
df02cec3f9bbce86e5e5cc39cb271d55	0	0	0	0	0	0	0	0	0	0	0	0	0	0	0	0	0	0	0	0	0	0	0	0	0	0	0	0	0	0	0	0	0	0	0	0	0	0	0	0	28	0	0	0	0	0	0	0	0
2d825e4c045e4cd3b398a30e6eca7146	0	0	0	0	0	0	0	0	0	0	0	0	0	0	0	0	0	0	0	19	0	0	0	0	0	0	121	0	0	0	38	0	0	0	0	0	0	0	0	0	23	0	0	30	0	0	0	0	0
d4b96534abe87dd4e040b3fa951e1d6a	0	0	40	0	0	93	0	0	45	0	0	0	28	0	0	0	0	0	0	50	0	0	0	12	0	0	0	33	0	0	0	0	0	57	0	0	0	56	0	0	64	0	0	51	0	0	146	0	26
2e9258d9a7829d1acd478b982abfb427	172	65	5357	181	94	3504	0	1183	41	83	451	317	476	196	146	50	46	816	199	166	1451	217	306	212	1111	101	99	324	362	153	0	110	1134	588	164	270	326	2831	113	5612	2885	434	537	99	220	1360	271	143	315
a1dd315efb8d76e55bd0165ae7f95a84	37	26	144	14	26	136	207	53	177	0	0	24	155	0	44	62	321	17	95	45	0	0	0	91	13	16	161	232	94	15	80	159	25	473	31	22	167	111	46	274	131	35	108	166	41	0	139	57	66
e5c63659917b4371ee50cc49cb5d6d20	0	0	0	0	0	0	0	0	0	0	0	0	0	0	0	0	0	0	0	0	0	0	0	0	0	0	0	0	0	0	52	0	0	0	0	0	0	0	0	0	0	0	0	0	0	0	0	0	0
1267891ad78a75e6dee4c10abae3c5ac	0	0	0	0	0	0	0	0	0	0	0	0	0	0	0	0	0	0	0	0	0	0	0	0	0	0	0	0	0	0	0	0	0	0	0	0	0	0	0	0	0	0	0	0	0	0	0	0	0
9a76c2c2904fcae623e236b6818a712e	25	0	48	38	0	18	40	0	47	24	15	0	25	50	45	18	66	52	52	56	17	29	0	20	0	34	0	52	0	70	0	47	0	62	0	23	0	32	40	0	34	17	0	36	58	0	60	35	21
0a263104ddfd64ad435b1f9cd6d29261	0	434	44	241	401	48	34	208	24	91	22	539	33	0	77	153	193	177	37	0	0	144	82	31	16	0	365	8	248	2	292	38	0	27	217	169	0	59	201	170	51	13	9	29	15	249	0	21	29
ce3c0a9198c3aa121eb2cb67f3bc77d4	0	0	0	0	0	0	0	0	0	0	0	0	0	0	0	0	0	0	0	0	0	0	0	0	0	0	0	0	0	0	0	0	0	0	0	0	0	0	0	0	0	0	0	0	0	0	0	0	0
ac3ec5d83ad2293df4b58f38fb34a11a	0	0	0	0	0	0	0	0	0	1491	0	0	0	0	0	2990	0	0	0	0	0	0	7638	0	0	0	19	0	3352	0	0	0	0	0	2125	0	0	0	0	0	0	0	0	581	0	0	0	0	0
c589fb7702574612251af0f102c2a836	0	0	0	0	0	0	0	0	0	0	0	0	0	0	0	0	0	0	0	0	0	0	0	0	0	0	0	0	0	0	0	0	0	0	0	0	0	0	0	0	0	0	0	0	0	0	0	0	0
c6db214ed09e937552f5aef16446c7b2	12733	9999	1611	717	13679	293	391	5161	1554	61	2025	406	0	995	746	678	5885	237	1393	507	291	920	1694	6059	797	347	22558	28158	208	1013	4526	2077	24983	607	102	933	3539	2736	553	4393	4942	499	322	450	561	958	1369	401	1685
20b2fbf2b5b68762497f87d256870024	0	0	0	0	0	0	0	0	0	0	0	0	17	0	0	0	0	0	0	0	0	0	0	0	0	0	0	0	0	0	0	0	0	0	0	0	0	0	0	0	0	0	0	0	0	0	0	0	0
92914b9b494872edb780a6158ddee5d2	0	0	0	57	0	0	0	0	0	0	0	0	0	0	0	0	0	0	0	0	0	61	0	0	66	0	0	39	80	0	0	0	0	0	0	0	100	0	0	85	0	0	0	0	0	0	0	0	0
0c87eb414d33e18542fe29a9e86ae534	0	0	0	0	0	0	0	0	0	0	0	0	0	0	0	0	0	0	0	0	0	0	0	0	0	0	0	0	0	0	0	0	0	0	0	0	33	0	0	0	0	0	0	0	0	0	0	0	0
4bf6fe45820cdd2603279504314eccf1	0	0	0	0	0	0	0	0	0	0	0	0	0	0	0	0	0	0	0	0	0	0	0	0	0	0	0	0	0	0	0	0	0	0	0	0	66	0	0	0	0	0	0	0	0	0	0	0	0
30448dec8cf165070271f122400f0a18	0	0	0	0	0	0	0	0	0	0	0	0	0	0	0	0	0	0	0	0	0	0	0	0	0	0	0	0	0	0	0	0	0	0	0	0	0	0	0	0	0	0	0	0	0	0	0	0	0
357a80b32978a6f5afd95ede2c32e3d6	0	0	0	0	0	0	0	0	0	0	0	0	0	0	0	0	0	0	0	0	0	0	0	0	0	0	0	0	0	0	0	0	0	0	0	0	0	0	0	0	0	0	0	0	0	0	55	0	0
ccb99a84b904ba424fb154cd48beec13	2630	0	0	63	0	15	37	0	0	0	0	0	0	0	0	0	0	0	27	0	0	51	0	0	0	0	0	0	18	0	0	0	41	0	0	0	0	0	0	0	0	0	0	0	0	0	0	0	0
851d82faaf829a97479012215dec3891	0	0	0	0	0	0	0	0	0	0	0	0	0	0	0	0	0	0	0	0	0	0	0	0	0	0	0	0	0	0	0	0	0	0	0	0	0	0	0	0	0	0	0	0	0	0	0	0	0
8eac7da8512beb3f4a620854b8d0adcc	0	0	0	0	0	0	0	0	0	0	0	0	0	0	0	0	0	0	0	0	0	0	0	0	24	0	0	0	0	0	0	0	0	0	0	0	0	0	0	0	0	0	0	0	0	0	0	0	0
53d6886fd37cd4d6ffd2932a4665c8b9	0	0	0	0	0	0	0	0	0	0	0	0	0	0	0	0	0	0	0	0	0	0	0	0	0	0	0	0	0	0	0	0	0	0	0	0	0	0	0	0	0	0	0	18	0	0	0	0	0
fccfc4f0c44a220c4a423bc1cee5c783	0	0	0	0	0	0	0	0	0	0	0	0	0	0	0	0	0	36	0	0	0	0	0	0	0	0	0	0	0	0	0	0	0	78	0	0	0	0	0	0	0	0	0	0	0	0	0	0	25
d0bac3bba493b7974c03f472de93f5af	0	0	0	0	0	0	0	0	0	0	0	0	0	0	0	0	0	0	0	0	0	0	0	0	0	0	0	0	0	0	0	0	0	0	0	0	0	0	0	0	0	0	16	0	0	0	0	0	0
117b21499b124573c1cafeab55ddba92	88	0	0	241	0	140	66	60	37	0	63	0	0	0	0	0	0	0	1030	35	0	173	48	0	180	0	0	396	0	0	0	88	2157	0	0	65	0	115	44	206	98	0	235	0	0	56	0	236	0
864a8d869f984751bfd85ed126880023	46	13	39	27	13	21	60	8	34	0	8	0	50	40	30	0	22	24	52	55	26	25	8	10	150	30	0	44	17	8	0	38	13	73	10	36	139	34	17	48	43	45	0	94	60	46	51	62	30
8a8d397f425df2a295fea5ffcdc8700e	0	0	0	0	0	0	0	0	0	0	0	0	0	0	0	0	0	0	0	0	0	0	0	0	0	0	0	0	0	0	0	0	0	0	0	0	0	0	0	0	0	0	0	0	0	25	0	0	0
fa45e27916a464b0190cd17d10dbd108	0	0	0	43	0	0	0	0	33	0	0	0	0	0	0	108	0	0	49	0	98	36	0	0	0	0	0	0	0	0	0	0	0	0	0	0	33	0	0	74	25	61	0	0	0	83	0	121	0
2d20f3759cc2ee195b548df74c87111c	0	7	0	0	10	0	0	0	0	0	0	0	0	0	0	0	0	0	0	0	0	0	0	0	0	0	21	53	0	0	0	0	0	4	0	0	9	0	0	0	0	0	0	21	0	0	0	0	0
f375d94a947ae5f088e89caaf86f0217	0	0	0	0	0	0	0	0	0	0	11	42	0	0	0	15	0	0	0	0	0	0	0	0	0	0	0	0	0	0	0	0	0	0	0	6	0	0	0	0	0	0	0	0	0	0	0	5	0
1d6bf10b45f4a3ffe187a0e687c183d0	0	0	0	0	0	0	0	0	0	0	0	0	0	0	0	0	0	0	0	0	0	0	0	0	0	0	0	0	0	0	0	0	0	0	0	0	0	0	0	0	0	0	0	0	0	0	0	0	0
2a8612df486b2406b1cfad380c412c5b	124	0	0	5	0	0	58	8	0	0	0	0	0	0	0	35	0	82	39	0	20	0	0	0	34	0	0	0	0	0	17	7	0	0	0	25	103	0	7	19	0	37	15	0	45	0	0	9	0
b5535002c5cb7ebfc26bd467e9268589	50	22	171	11	0	128	53	24	139	0	0	0	257	0	172	28	0	0	82	158	0	13	0	22	146	0	0	340	0	0	0	37	15	135	0	9	70	137	0	120	151	0	0	137	0	14	66	0	141
6b61bef44a9531b05a81de06dc7caabb	0	0	0	0	0	0	0	0	0	0	0	0	0	0	0	0	0	0	0	0	0	0	0	0	0	0	0	0	0	0	0	0	0	0	0	0	0	0	0	0	0	0	0	0	0	0	0	0	0
b651b0aab2966f19690a77fd3e7c2e61	0	0	0	0	0	0	0	0	0	0	0	0	0	0	0	0	0	0	0	0	0	0	0	0	0	0	0	0	0	0	0	0	0	0	0	0	0	0	0	0	0	0	0	0	0	0	0	0	0
137db4c5b7c21fe244b7da7df4e5748d	0	0	0	0	0	0	0	15	0	0	0	0	0	0	0	0	0	0	0	0	0	0	0	0	0	0	0	0	0	0	0	0	0	0	0	0	0	0	0	0	0	0	0	0	0	0	0	0	0
c14b5641c459ad36559580e608316bbb	0	0	0	0	0	0	0	0	0	0	0	0	0	0	0	0	0	0	0	13	0	0	0	0	0	0	0	0	0	0	0	0	0	0	0	0	0	0	0	0	0	0	0	0	0	0	0	0	0
122413249cc9df4de3ab4bdfe8b9fcdc	0	0	0	0	0	0	0	0	0	0	0	0	0	0	0	0	0	0	0	0	0	0	0	0	0	0	0	0	0	0	0	0	0	0	0	0	0	0	0	0	0	0	0	0	0	0	0	0	0
eba1c35a621e38b5c758afcd74fff415	0	0	0	0	0	0	0	0	0	0	0	0	0	0	0	0	0	0	0	0	0	0	0	0	0	0	0	0	0	0	0	0	0	0	0	0	0	0	0	0	0	0	0	0	0	0	0	0	0
ed20182733c168c718dadd1bee77f312	0	0	0	0	0	0	0	0	0	0	0	35	0	21	0	0	0	0	303	0	0	0	0	0	0	17	0	0	0	0	0	0	74	0	0	39	0	0	0	0	0	0	45	22	0	0	0	0	0
cefdb749a700d81310040d2d7bdd0c5d	0	0	0	0	0	0	0	0	0	0	0	35	0	0	0	0	0	0	0	0	0	0	0	0	0	0	0	0	0	0	0	0	0	0	9	0	0	0	0	0	0	0	0	0	0	0	0	0	0
dacbb43aadb156a1426ba993514d9c15	0	0	0	0	0	0	0	0	0	0	0	0	0	0	0	0	0	0	0	0	0	0	0	0	0	0	0	0	0	0	0	0	0	0	0	0	0	0	0	0	0	0	0	0	0	0	0	0	0
937697d09280ddf9ee8c4ed5d92da270	27	0	9	270	0	0	12	0	0	33	34	0	0	11	0	73	0	8	53	0	0	170	0	0	180	11	0	0	215	45	0	287	0	11	89	10	0	0	13	0	0	26	0	16	11	132	0	11	0
49c3f58a383fa800e4c731799e33f585	0	0	0	0	21	0	0	0	0	0	0	0	0	0	0	0	0	0	0	0	0	0	0	0	0	0	0	0	0	0	0	0	0	0	0	0	0	0	0	0	0	0	0	0	0	0	0	0	0
6c89628c54b1b54c1820628180f27010	0	0	0	0	0	0	0	3	3	0	0	13	0	0	3	45	0	0	0	0	0	0	0	3	0	0	0	0	9	0	0	0	0	0	0	0	0	0	0	0	0	0	29	0	2	0	0	4	0
be3e0a05c0506cc67592275e7536d6b3	0	0	0	0	0	0	0	0	0	0	0	0	0	0	0	0	0	0	0	0	0	0	0	0	0	0	0	0	0	0	0	0	0	0	0	0	0	0	0	0	0	0	0	0	0	0	0	0	0
9172e7deb019e4b29ec0d8afb3910022	0	0	0	0	0	0	92	0	49	23	20	91	0	9	0	58	0	6	20	0	0	0	442	0	0	0	0	0	71	9	0	0	0	0	60	39	32	7	14	26	0	0	0	0	0	10	23	0	0
084e819f5f8e00178f97a75e779afebc	0	0	229	0	0	0	0	0	0	0	0	0	0	0	0	0	0	0	0	0	0	0	0	0	0	0	0	0	0	0	0	0	0	0	0	0	0	0	0	0	0	0	0	0	0	0	0	0	0
07699fa14cb8970eee5e8dda19dd5dbe	0	0	0	0	0	0	0	0	0	0	0	0	0	0	0	0	0	0	0	0	0	0	0	0	0	0	0	0	0	0	0	0	0	0	0	0	0	0	0	0	0	0	0	0	0	0	0	0	0
20ec2a78b6ac69a34c740ba8fd339ac9	0	0	15	0	7	0	0	7	7	0	0	0	14	0	0	14	0	0	0	0	0	0	13	0	0	0	0	0	0	0	0	0	0	9	0	0	0	9	0	0	9	0	0	11	0	0	0	0	0
a9e99b19fe094b989a9d7764b925d179	0	0	0	0	0	0	0	0	0	0	0	0	0	0	0	0	0	0	0	38	0	0	0	0	0	0	0	0	100	0	0	0	0	0	94	100	0	32	0	0	0	0	0	0	0	0	0	0	56
5a01670718469f5af6af0baea96a7dbf	0	0	0	0	0	0	0	0	0	0	0	0	0	0	0	0	0	0	0	0	0	0	0	0	0	0	0	0	0	0	0	0	0	0	0	0	0	0	0	0	0	0	0	0	0	0	0	0	0
f42b41aebbe3ff03e60201bff31230f0	0	0	0	0	0	0	0	0	0	0	0	0	0	0	0	0	0	0	0	0	0	0	0	0	0	0	0	0	0	0	0	0	0	0	0	0	0	0	0	0	0	0	0	0	0	0	0	0	0
7557cd1c47a3164c5630a84ab65a348f	0	0	0	0	0	0	0	0	0	0	0	33	0	0	0	0	0	0	0	0	0	0	0	0	0	0	0	0	0	0	0	0	0	0	0	0	0	0	0	0	0	0	0	0	0	0	0	0	0
dc6238760f7fb47db3501252a3751840	0	28	0	0	32	82	0	42	0	0	0	0	0	11	41	0	0	0	0	0	0	0	0	0	0	0	0	76	0	0	0	0	0	24	0	0	0	0	0	0	0	0	0	0	0	11	0	0	0
508d59288f5b1e9d3d1183ed182eb74e	0	0	0	0	0	0	0	0	0	0	0	0	0	0	0	0	0	0	0	0	0	0	0	0	0	0	0	0	0	0	0	0	0	0	0	0	0	0	0	0	0	0	0	0	0	0	0	0	0
a5ed1c3fbdb29651bc0b3cfde1a90b3b	14	15	60	0	0	10	0	16	0	0	0	0	48	0	48	0	0	0	0	17	0	0	0	0	0	0	25	134	0	0	0	0	74	0	0	0	0	37	0	0	43	0	0	25	0	0	0	0	11
8de8c9ea4717d7d4bf752592ada6a2d2	0	30	0	0	0	0	0	0	0	0	0	0	0	0	0	0	0	0	0	0	0	0	0	0	0	0	103	0	0	0	141	0	0	0	0	0	0	0	34	128	0	0	0	0	0	0	0	0	0
57a44e2b708ab0a2de3feb61934b5d10	0	0	0	12	0	0	0	0	0	0	0	0	0	0	0	0	0	0	0	0	0	0	0	0	0	0	0	0	0	0	0	0	0	0	0	0	0	0	0	0	0	0	0	0	0	0	0	0	0
ee16cbb1681ba36bf5f930f92cf4e9dd	0	0	0	0	20	0	0	0	0	0	0	0	0	0	0	0	0	0	0	0	0	0	0	0	0	0	0	0	0	0	0	0	0	0	0	0	0	0	0	0	0	0	0	0	0	0	0	0	0
9b015692d5bce44211b8e712fb6afdba	17	0	15	0	0	0	0	0	13	0	0	0	0	0	17	0	0	0	0	0	0	0	0	0	0	0	0	0	0	0	0	0	0	0	0	0	0	0	0	17	26	0	0	0	0	0	0	0	0
61393a6cad17c6ae062b5a206dba34ed	0	0	0	0	0	0	0	0	0	0	0	0	26	0	0	0	0	0	0	0	0	0	0	0	0	0	0	59	0	0	0	0	0	0	0	0	0	0	0	0	0	0	0	109	0	0	0	0	0
9f1be7737373c78d6edf0b6aefaf9fba	0	12	0	0	0	0	0	0	0	0	0	0	0	0	0	0	0	0	0	0	0	0	0	0	0	0	0	0	0	0	0	0	0	0	0	0	0	0	0	0	0	0	0	0	0	0	0	0	0
c1e1932d3ebd93b4e8f01cfb93761320	42	0	0	0	0	0	0	0	0	0	0	0	0	0	44	0	0	0	0	0	0	23	12	0	33	0	0	12	0	0	0	17	88	0	0	0	0	0	0	48	0	0	0	0	0	0	0	0	27
e180b4e43078322cbcfccb3fff21ae38	0	0	0	0	0	0	0	0	0	0	0	0	0	0	0	0	0	0	0	0	0	0	0	0	0	0	0	0	0	0	0	0	0	0	0	0	0	0	0	0	0	0	0	0	0	0	0	0	0
5dd9c113c6203f0314391e48c5853f4d	0	0	0	0	0	0	0	0	0	0	0	0	0	0	0	0	0	0	0	0	0	0	0	0	0	0	0	0	18	0	0	0	0	0	0	0	0	0	0	0	0	0	0	0	0	0	0	0	0
9862bdfcb9fb184e90a530e5d4caa364	0	0	17	0	0	0	0	0	0	0	0	0	0	0	0	0	0	0	0	0	0	0	0	0	0	0	0	0	0	0	0	0	0	0	0	0	0	0	0	0	0	0	0	0	0	0	0	0	0
60f56142db23ffc0b0173c481820312f	0	0	0	0	0	0	0	0	0	0	0	0	0	0	0	0	0	0	0	0	0	0	76	0	0	0	0	0	0	0	0	0	0	0	0	0	0	0	0	0	0	0	0	0	0	0	0	0	0
cbc2be8787aa2ad673bbc1ef9f61d86c	0	0	0	0	0	0	0	0	0	0	0	0	0	0	0	0	0	0	0	0	0	0	0	0	0	0	0	0	0	0	0	0	0	0	0	0	0	0	0	0	0	0	0	0	0	0	0	0	0
5addd03e8e95bbcc8264a1a4f385f9b0	0	0	0	0	0	0	30	0	0	0	0	0	0	0	0	0	0	0	0	0	0	0	0	0	0	0	0	0	0	0	0	0	0	0	0	44	0	0	0	0	0	0	0	0	0	0	0	0	0
1e391cd12f9c7ff63106f8c15cb59840	0	0	0	0	0	0	0	0	0	0	0	0	0	0	0	0	0	0	0	7	0	0	0	0	0	0	0	0	0	0	0	0	0	0	0	0	0	0	0	0	8	0	0	0	0	0	0	0	0
b5a0ef9d721610506cda6136a8d56b3a	0	0	0	0	0	0	0	0	286	0	0	0	0	0	0	39	0	0	0	0	0	0	0	0	0	0	0	0	0	0	0	0	0	0	0	0	0	0	0	0	0	0	0	0	0	0	0	0	0
146845b2a1a454b5fd80502e174a289e	0	0	0	0	0	0	0	0	0	0	0	0	0	0	0	0	0	0	0	0	0	0	0	0	0	0	88	0	0	0	0	0	0	0	0	0	0	0	0	0	0	0	0	0	0	0	0	0	0
faad38fe322aa180f087ce3f6661b491	0	0	0	137	0	0	110	0	0	0	0	0	0	0	0	0	0	0	115	0	0	0	0	0	0	0	0	0	0	0	0	0	0	0	0	0	0	0	0	0	0	65	0	0	0	0	0	0	0
736716bfcf03f9b6f397ce870b491462	59	133	226	159	176	205	0	134	661	49	248	54	0	70	78	96	48	478	141	74	323	121	102	30	1251	90	55	250	202	386	189	37	45	205	128	71	782	149	27	223	102	202	108	0	45	478	134	195	70
8a3136718b4f5c24cd31e802e37935f9	390	97	64	0	125	11	0	123	0	0	0	38	365	0	70	64	40	0	0	129	0	0	0	0	0	0	81	944	0	0	0	0	149	80	15	0	0	16	0	12	56	0	0	434	0	0	0	0	75
11d9522fda02555d2f7ed14fc5e7432b	0	0	2000	0	0	0	0	0	0	0	0	0	0	0	34	0	0	0	0	0	0	0	0	0	472	0	0	0	0	0	0	0	0	0	0	0	0	1401	0	0	859	0	0	0	0	0	0	0	99
be581f561bffe609bf14c1a6bc581c0b	0	0	0	0	0	0	0	0	0	0	0	0	0	0	0	0	0	0	0	0	0	0	0	0	0	0	0	0	0	0	0	0	0	29	0	0	0	0	0	0	0	0	0	0	0	0	0	0	0
09d072a4cf96e01e4d9d20944fd1812f	0	0	0	0	0	0	0	0	0	0	0	0	0	0	24	0	0	0	0	0	0	0	0	0	0	0	0	0	0	0	0	0	0	0	0	0	0	0	0	0	0	0	0	0	0	0	0	0	0
8250997c18a29ccf295e848bb7b05c11	0	0	0	0	0	43	0	37	49	0	0	0	56	0	0	0	85	0	0	0	0	0	0	0	0	0	0	100	0	0	0	0	0	48	0	0	0	42	0	0	81	0	0	600	0	0	0	0	0
e59cd0824ba157b95174847253cbc8e9	0	30	0	0	27	0	0	0	0	0	0	0	0	0	23	0	0	0	17	24	12	0	0	6	17	0	0	0	12	0	0	0	0	19	0	0	0	0	0	0	9	0	12	46	0	0	12	0	0
984c1deb4536d15d73826b51441762b5	0	0	0	81	0	0	0	0	0	0	0	0	0	0	0	0	0	0	0	0	0	0	0	0	0	0	0	0	0	0	0	0	0	0	0	0	0	0	0	0	0	0	0	0	0	0	0	0	0
1bc2abfe981f5f8148f639894e00dbad	0	0	85	0	0	0	12	0	0	0	0	0	17	52	0	115	0	0	0	25	0	0	0	0	0	48	0	23	52	0	0	43	0	0	29	0	0	0	12	0	0	15	0	0	17	0	0	0	0
71fe586522281cb02d2744ff9d98ff7b	0	0	0	0	0	0	0	0	0	0	0	0	0	0	0	0	8	0	0	0	0	0	0	0	0	0	0	17	0	0	0	0	0	0	0	0	0	0	0	0	0	0	0	0	0	0	0	0	0
d47759d893912cbffa32228fca222575	0	0	0	0	0	0	0	0	0	0	0	0	0	0	0	0	0	0	0	0	0	0	0	0	0	0	0	0	0	0	0	0	0	0	0	0	0	0	0	163	0	0	0	0	0	0	0	0	0
550327b6562a1b7a66ce3cfb07296ba1	0	0	0	0	0	0	0	101	0	0	0	0	26	0	0	0	0	0	0	0	0	0	33	60	0	0	0	0	0	0	0	0	631	45	0	0	0	0	0	0	12	0	0	23	0	0	0	0	0
10b5a8c219a959feee093444757e7e86	0	0	0	0	0	0	0	0	0	0	0	0	0	0	0	0	0	0	0	0	0	0	0	0	0	0	0	0	0	0	0	0	0	0	0	0	0	0	0	0	0	0	0	0	0	0	0	0	0
79aaff64e665b8267139ce8b4b829e45	0	0	0	0	0	0	0	0	0	0	0	0	147	0	0	0	0	0	0	0	0	0	0	0	0	0	0	0	0	0	0	0	0	0	0	0	0	0	0	0	0	0	0	0	0	0	0	0	0
3fc80e9aa6d68fda15dfef9002701776	0	301	0	0	420	0	0	0	0	0	0	0	0	0	0	232	0	0	0	0	0	0	27	0	0	0	0	0	0	0	0	0	0	0	0	0	0	0	0	0	0	0	0	0	0	0	0	0	0
86d7685d06e08bdd3aa0cb0d98b7bc65	0	0	0	0	0	0	0	0	0	0	0	0	0	0	0	20	0	0	0	0	0	0	0	0	0	0	0	0	0	0	0	0	0	0	0	0	0	0	0	0	0	0	0	0	0	0	0	0	0
99648466c4b6d0ed907e63f9fb8dfde1	0	0	0	0	0	0	0	0	10	0	0	0	0	0	0	0	0	0	0	0	0	0	0	0	0	0	0	0	0	0	0	6	0	0	0	0	0	0	0	0	0	0	0	0	0	0	9	0	0
4e9fa16fc09e3bdfedc38ffe89cf255e	0	0	0	0	0	0	0	0	0	0	0	17	0	0	0	0	41	17	0	29	0	0	0	0	0	0	0	0	0	0	0	46	0	0	0	0	0	0	0	0	0	0	114	0	0	379	7	20	0
ad880a14d537c68142fb8a2de97a80c6	0	0	0	0	0	0	0	0	0	0	0	0	0	0	0	0	0	0	0	0	0	0	0	0	0	0	0	0	0	0	0	0	0	0	0	0	0	0	0	0	0	0	0	10	0	0	0	0	0
ed2570b327e907d27cbc396322300c9c	48	2691	111	1043	3085	160	479	4792	26	1456	1034	1140	38	779	60	476	3127	1149	199	48	770	899	565	879	1068	561	3015	33	2495	698	1242	856	84	280	2404	276	2546	38	1769	1141	0	600	512	52	383	1404	81	651	28
9dabdd5ace48dece4062c19667c7e54b	0	0	0	0	0	0	0	0	0	0	0	0	0	0	0	0	0	0	11	0	0	0	0	0	0	0	0	0	0	0	0	0	0	0	0	0	0	0	0	0	0	0	0	0	0	0	0	0	0
c2a5c96b7ca513bb83969342185983fb	156	0	0	15	0	0	0	0	0	0	28	0	0	0	0	0	0	0	23	0	0	13	0	0	0	0	0	0	0	52	0	10	21	0	0	0	189	0	0	56	0	0	0	0	0	0	0	0	0
6b97ec3c372f211f4cbfb4b5d3e9f9a9	0	0	0	0	0	0	0	0	0	0	0	0	0	0	0	0	0	0	0	0	0	0	0	0	0	0	0	0	0	0	0	0	0	0	0	0	0	0	0	0	15	0	0	0	0	0	0	0	0
55f305a6c1335d6ba520b1cd43b0a41e	0	0	0	0	0	0	0	0	0	0	0	0	0	0	0	0	0	0	0	0	0	0	0	0	0	0	0	0	0	0	0	0	0	0	0	0	0	0	0	33	0	0	0	0	0	0	0	0	0
20689eef57fdfda55c94517d15bb0fca	543	220	65	0	240	138	0	12	0	0	28	79	0	0	56	0	37	0	85	46	0	0	29	89	0	0	83	618	0	0	67	18	635	0	11	0	84	49	0	193	142	0	0	0	0	94	27	0	0
f444ddd3afa52aa9f0c1556f35db75a9	0	0	0	0	0	0	0	0	0	0	0	0	0	0	0	0	0	0	0	0	0	0	0	0	0	0	0	0	0	0	0	0	0	0	0	0	0	0	0	0	0	0	0	0	0	0	0	0	0
610bc97f6ad82d064b380832ae4ae464	0	0	0	0	0	0	0	0	0	0	61	0	0	0	0	0	134	0	0	0	0	0	0	0	0	0	0	0	0	0	0	0	0	0	0	0	0	0	0	106	0	0	0	0	0	0	0	0	0
66f2808db8cbc463b7604561eddcc139	0	0	0	0	0	0	0	0	0	0	0	0	0	0	0	0	0	0	0	0	0	0	0	0	0	0	0	0	0	0	0	0	0	0	0	0	11	0	0	0	0	0	0	0	0	0	0	0	0
5abb5fcedac3c7519e1323789d2a178a	0	0	40	0	0	11	0	0	0	0	0	0	0	0	26	0	0	0	0	0	0	0	0	0	0	0	0	0	0	0	0	0	0	19	0	0	0	0	0	0	0	0	0	0	0	0	0	0	18
bac8e8f71d424b7205aeae414e1fed17	0	0	0	0	0	0	0	0	0	0	0	0	0	0	0	0	0	0	0	42	0	0	0	0	0	0	0	0	0	0	0	49	0	55	0	0	0	234	0	310	220	0	0	0	0	13	0	0	0
c302ab1fe053292970e03bec66df048e	0	0	0	0	0	0	0	0	0	0	0	0	0	0	0	0	0	0	0	0	0	0	0	0	0	0	0	0	0	0	0	0	10	0	0	0	0	0	0	0	0	0	0	0	0	0	0	0	0
07f8b0f350b0eef624997bc29fea6748	0	0	0	0	0	0	0	0	0	0	0	0	0	0	0	0	0	0	0	0	0	0	0	0	0	0	0	0	0	0	0	0	0	0	0	51	0	0	0	0	0	0	0	0	0	0	0	0	0
05ec0d5b98a3b01edeffd1fcefdbf888	0	0	0	0	0	0	0	0	0	0	0	0	0	0	0	0	0	0	0	0	0	0	0	0	0	0	0	0	0	0	0	0	0	0	0	0	0	0	0	0	0	0	0	0	0	0	0	0	0
d03a1eb44858360ebb225e4852eae496	0	0	11	0	0	0	0	0	0	0	0	0	0	0	0	0	0	0	0	13	0	0	0	40	0	0	0	124	0	0	0	0	0	0	0	0	0	0	0	0	0	0	0	16	0	0	0	0	0
57b068548c9aa408f60fdd916bc4bbac	0	0	0	0	0	0	0	0	0	0	0	0	9	0	0	0	0	0	0	0	0	0	0	0	0	0	0	0	0	0	0	0	0	0	0	0	0	7	0	0	9	0	0	0	0	0	0	0	0
1948ac2c3037ccd38b98657db1ca27fc	0	0	0	0	0	0	0	0	0	0	0	0	0	0	0	0	0	0	0	0	0	0	0	0	0	0	0	0	0	0	0	0	0	0	0	0	0	0	0	0	0	0	0	0	0	0	0	0	0
91701fa9f6032997c561d7f7996b4025	0	0	0	0	0	0	0	0	0	0	0	0	0	0	0	0	0	0	0	0	0	0	0	0	0	0	0	0	0	0	0	11	0	0	0	0	0	0	0	0	0	0	0	0	0	0	0	0	0
e7cdec7d4d4689422449a609686fa566	0	0	0	0	0	0	1	0	0	0	0	0	0	0	0	10	0	0	0	0	0	0	0	0	0	0	0	0	0	0	0	0	1	0	0	0	0	0	0	2	0	0	0	0	0	0	0	0	0
c1fabd4a1709b45b18829f7c65acf8c1	68	62	75	18	50	97	22	28	90	0	0	48	0	0	27	0	0	0	91	162	0	16	121	118	81	0	90	40	69	0	48	0	137	52	36	0	247	38	0	133	71	122	63	0	58	13	47	0	0
226a59787f53f449f538d1abac5a4d0b	0	0	0	0	0	0	0	0	0	0	0	0	0	0	0	0	0	0	0	0	0	0	0	0	0	0	0	0	0	0	0	0	0	12	0	0	0	0	0	0	0	0	0	0	0	0	0	0	0
28909a8304a25796b27e71b4640ced91	940	263	0	167	302	76	21	0	0	0	164	0	81	357	884	0	310	86	190	253	0	132	48	27	47	219	211	512	0	510	233	57	1208	70	22	22	599	76	69	691	78	126	0	324	95	334	0	49	112
2d40c65f2cd7e5a76f694a5d2e365871	0	0	424	0	0	48	0	0	94	17	0	0	0	0	14	91	0	0	46	0	0	0	0	81	0	0	70	0	69	138	89	165	0	0	36	0	60	0	25	16	0	0	45	33	0	44	30	101	0
a12a7c5fe546dcb66df8c6e38c4d4ff4	0	0	0	0	0	0	0	0	0	0	0	0	0	0	0	0	0	0	0	0	0	0	0	0	0	0	0	0	0	0	0	0	0	0	0	0	0	0	0	0	0	0	0	0	0	0	0	0	0
f7d7dae0fde6458f5789cf3fcd9e30cd	0	0	0	0	0	0	0	0	0	0	0	0	0	0	115	0	0	0	0	0	0	0	0	0	0	0	0	0	0	0	0	0	0	0	0	0	0	0	0	0	0	0	0	0	0	0	0	0	0
cf3ea69eaf7ae0ad106b67625767fd74	0	0	0	0	0	0	0	0	0	0	0	0	0	0	0	0	0	0	0	0	0	0	0	0	0	0	0	0	0	0	0	0	0	0	0	0	0	0	0	0	0	0	0	0	0	0	0	0	0
e5c6191772bcea29568becdafd0ecce1	0	0	0	0	0	0	0	0	0	0	0	0	0	0	0	0	0	0	0	0	0	0	0	0	0	0	0	0	0	0	0	0	0	0	0	0	0	0	0	0	0	0	0	0	0	0	0	0	0
c1c697e37d3e8ee90f5f5d4c111faba8	0	0	0	0	0	0	0	18	0	0	0	0	0	0	0	0	0	0	0	0	0	0	0	0	0	0	0	0	0	0	0	0	0	0	0	0	0	0	0	0	0	0	0	0	0	0	0	0	0
d1a1a50ca784e476a7f0e610c763ffc6	0	0	0	0	0	0	0	0	0	0	0	0	0	0	0	0	0	0	0	0	0	0	0	0	0	0	0	0	0	0	0	0	0	0	0	0	0	0	0	0	0	0	0	0	0	0	0	0	0
4cfb416a1b4ad371b26f1ba051a9ce0f	676	30	13	138	24	67	12	0	44	10	133	0	163	96	85	62	9	24	233	0	0	63	0	86	0	16	29	0	29	107	0	342	942	142	0	259	63	21	11	32	38	0	23	65	27	32	58	196	23
b2e412bc330bdd65dd33311e075c75a5	0	0	0	117	0	0	0	0	0	0	0	0	0	0	0	0	0	0	0	0	0	92	0	0	59	0	0	0	0	0	0	0	0	0	0	0	0	0	0	0	0	0	0	0	0	0	0	0	0
f2c7e8bc7b3593df5611bdc35d93c3d5	0	81	408	0	65	0	0	69	220	0	6	0	0	0	0	0	0	0	0	157	0	0	0	264	0	0	0	18	0	0	0	0	0	45	0	0	0	0	0	0	0	0	0	177	8	0	106	0	0
e1a65ba830f98a00b51fe8bb4333a4ab	0	0	0	0	0	0	0	0	0	0	0	0	0	0	0	0	0	0	0	0	0	0	0	0	0	0	0	0	0	0	0	0	0	0	0	0	0	0	0	0	0	122	0	0	0	0	0	0	0
1384895dfacfca46e9b109822c9e1cb6	0	35	0	0	39	0	312	0	0	0	18	39	17	0	9	16	0	58	0	0	0	36	16	0	47	0	59	0	92	250	43	96	0	0	0	157	121	0	5	100	0	0	0	0	0	84	0	35	0
52780a462fa9fa0fb9094df6d61db3c1	0	0	0	0	0	0	35	0	0	0	0	0	0	0	0	0	0	0	0	35	0	0	0	0	0	0	0	0	0	0	0	29	0	0	0	0	0	0	0	0	0	0	0	0	0	0	31	0	0
6c323eda96f7c1fd17b16694c3e35784	0	0	0	0	0	0	0	0	0	0	0	0	0	0	0	0	0	0	0	0	0	0	0	0	0	0	0	0	0	0	0	0	0	0	0	0	0	0	0	0	0	0	0	0	0	0	0	0	0
63b7c94abd30e385ba36e11de6a13a19	0	0	0	0	0	0	0	0	0	0	0	0	0	0	0	0	0	0	0	0	0	0	0	0	0	0	0	0	0	0	0	0	0	0	0	0	0	0	0	0	0	0	0	0	0	0	0	0	0
90fc98384f4c75128860a641350b032e	0	0	0	0	0	0	0	0	0	0	0	0	0	0	0	37	0	0	0	0	0	0	0	0	0	0	0	0	0	0	0	0	0	0	0	0	0	0	0	0	0	0	0	0	0	0	0	0	0
98c9c7be502f457237679695ac0569b3	0	28	1163	0	36	119	0	98	16	0	0	0	248	0	57	0	67	0	0	0	0	0	0	0	629	0	0	13	0	0	0	0	0	161	0	0	0	34	0	0	18	96	0	81	0	0	44	0	35
9100c673ddb0128f63023d0c6d423792	0	0	0	0	0	0	0	0	0	0	0	0	0	0	0	0	0	0	0	0	0	0	0	0	0	0	0	0	10	0	0	0	0	0	0	0	0	0	0	0	0	0	0	0	0	0	0	0	0
b3d6946ceb4130591d664cb0e0b5d142	0	0	0	129	0	0	63	0	0	0	0	0	0	0	0	0	0	0	0	0	0	117	0	0	0	0	0	0	0	0	0	0	0	0	0	0	0	0	0	0	0	0	0	0	0	0	0	0	0
b0f4fb6bc9e9456a8410d43b18acaec2	0	0	0	0	0	0	0	0	0	0	0	0	0	0	0	0	0	0	0	0	0	0	0	0	0	0	0	0	0	0	0	0	0	0	0	0	0	0	0	0	0	0	0	0	0	0	0	0	0
4e5339014235465f64a46c00fad3b128	0	0	0	0	0	0	0	0	0	0	0	0	0	0	0	0	0	0	0	0	0	0	0	0	0	0	0	0	0	0	0	0	0	0	0	0	0	0	0	0	0	0	0	0	0	0	0	0	0
0fd6f468dd4b578ccdacccefa27fc3e5	215	7	0	0	22	0	0	0	0	0	12	0	0	0	0	0	0	5	90	0	0	0	0	0	0	0	0	0	0	0	0	0	607	0	0	0	83	0	0	122	0	5	0	0	5	0	33	4	0
7d27a164b8a747788c0f690e7eaa1467	0	0	0	0	0	0	0	0	0	0	0	0	0	0	0	0	0	0	0	0	0	0	0	0	0	0	0	0	0	0	0	0	31	0	0	0	0	0	0	0	0	0	0	0	0	0	0	0	0
54003fd4e8dea9a0f90e72b57c970ef8	0	591	0	493	691	0	0	0	165	0	0	0	0	0	0	104	0	0	0	0	0	458	0	0	50	0	0	53	0	0	0	464	0	0	0	138	0	0	0	0	0	40	0	0	38	0	0	247	0
5177dbea96eb9ee93bf1dfabd2baf32b	0	0	0	0	0	0	0	0	0	0	0	0	0	0	0	0	0	0	0	0	0	0	0	0	0	0	0	0	0	0	0	0	0	0	0	0	0	0	0	0	0	17	0	0	0	0	0	0	0
c29618d175c4efb0f549a23c57a3de33	0	0	0	0	0	54	0	0	0	0	0	0	0	0	0	0	0	0	0	0	0	0	0	0	0	0	0	0	0	0	0	0	0	0	0	0	0	0	0	0	0	0	0	0	0	0	0	0	0
2ca4c537875d3e69bb40dc4fe6c8af30	0	449	0	0	459	409	72	127	0	0	0	0	0	0	0	55	0	0	0	0	0	0	0	0	0	0	63	0	0	29	127	0	49	0	0	0	39	0	0	67	0	0	59	0	0	0	0	0	0
fd92842b035f26906bf8f0d7012a9df8	0	0	0	0	0	0	0	0	0	0	0	0	0	0	0	0	0	0	0	0	0	0	0	0	0	0	0	0	0	0	0	0	0	0	0	0	0	0	0	0	0	219	0	0	147	0	0	0	0
67933f4ec026d583c8c0ee449af6a997	0	0	0	0	0	0	0	0	18	0	0	0	0	0	0	0	0	0	0	0	0	0	0	0	0	0	0	0	0	0	0	0	0	0	0	0	0	0	0	0	0	0	0	0	0	0	0	0	0
d22799458e0b54cb60dac247ff6f24df	0	0	0	0	0	0	0	0	0	0	0	0	0	0	0	0	0	0	0	0	0	0	0	0	0	0	0	0	0	0	0	135	0	0	0	0	0	0	0	0	0	0	0	0	0	0	0	0	13
58fc6f3a52d8fdae88841fbd24232ea3	0	0	0	0	0	0	0	0	0	0	0	0	0	0	0	0	0	0	0	0	0	0	0	0	0	0	0	0	0	0	0	0	0	0	0	0	0	0	0	0	0	0	37	0	0	0	0	0	0
dff2deb77b8435b778dfc5ba05144f0a	0	0	0	0	0	0	0	0	0	0	0	0	0	0	0	0	0	0	0	0	0	0	0	0	0	0	0	0	0	0	0	0	0	0	0	0	0	0	0	0	0	0	0	0	0	0	0	0	0
be6d6ac9eb0e4513248270e19a265d15	0	0	0	0	0	0	0	0	0	0	0	0	0	0	0	0	0	0	0	0	0	0	0	0	0	0	0	0	0	0	0	0	0	0	0	0	0	0	0	27	0	0	0	0	0	0	0	0	0
f79a456c502707a4d552103bb1b8fa0f	0	0	0	0	0	0	0	0	0	0	0	0	0	0	0	0	0	0	0	0	0	0	0	0	0	0	96	0	0	0	0	0	0	0	0	0	0	0	0	0	0	0	0	0	0	0	0	0	0
f570ecf635d2186f3c2a1c55f9fbedea	0	0	0	0	0	0	0	0	0	0	0	0	0	0	0	0	0	0	0	0	0	0	0	0	0	0	0	0	0	0	0	0	40	0	0	72	0	0	0	0	0	0	0	0	0	0	0	0	0
b38c015b03cf23635643b20391c2893b	0	0	0	0	16	0	0	0	0	0	0	0	0	0	0	0	0	0	0	0	0	0	0	0	0	0	0	0	0	0	0	0	0	0	0	0	0	0	0	0	0	0	0	0	0	0	0	0	0
0e6d8e6da8c47f08f722b84cc5b8156e	0	0	0	0	0	0	0	0	0	0	0	0	0	0	0	0	0	0	0	0	0	0	0	0	0	0	36	0	0	0	0	0	0	0	0	0	0	0	0	0	0	0	0	0	0	0	0	0	0
81b066e66aee063c31e64d028a57b2ec	0	0	0	0	0	0	0	0	10	0	0	0	0	0	0	0	0	0	0	0	0	0	0	0	0	0	0	0	0	0	0	0	0	0	0	0	0	0	0	0	0	0	0	0	0	0	0	0	0
a9094ae79190c3c37404d0e9188616b6	0	0	0	0	0	0	0	0	0	0	0	0	0	0	0	0	0	0	0	0	0	0	322	0	0	0	0	0	0	0	0	0	0	0	0	0	0	0	0	0	0	0	0	0	0	0	0	0	0
f037277ff01518c89cbc95df67c0cd0a	0	0	0	0	0	0	0	0	0	0	0	0	0	0	0	0	0	0	0	0	0	0	0	0	0	0	97	17	0	0	42	0	41	0	0	0	20	0	0	0	0	0	0	0	0	0	0	0	0
c9d8c5bcfe274306d044aad4067cb86d	58	14	61	93	31	116	89	26	181	0	42	27	0	103	87	168	0	51	113	74	27	89	19	21	97	68	51	0	0	20	74	61	52	172	13	92	183	62	0	151	87	121	107	94	129	120	114	92	83
14c276b56769dd7b3773dd5b43b1b618	0	0	0	0	0	0	0	0	0	0	0	0	0	0	0	0	0	0	0	0	0	0	0	0	0	0	0	0	0	0	0	0	0	0	0	46	0	0	0	0	0	0	0	0	0	0	0	0	0
3bcac097e00746285b6e72fcce61369e	0	0	0	0	0	0	0	0	0	0	0	0	0	0	0	0	0	0	0	0	0	0	0	0	0	0	0	0	0	0	0	0	0	0	0	0	0	39	0	0	40	0	0	0	0	0	0	0	0
8cd203913877f6ba78526ca0b3e7049f	0	0	0	0	0	0	0	0	0	0	0	0	0	0	0	0	0	0	0	0	0	0	0	0	0	0	0	0	0	0	0	0	0	0	0	0	0	0	0	0	0	0	0	0	0	0	0	0	0
f9e7847e618d93902716270b3cf2331f	0	0	0	0	0	0	0	0	0	0	0	0	0	0	0	0	0	0	0	0	0	0	0	0	0	0	0	0	0	0	0	0	0	0	0	0	0	0	0	0	25	0	0	0	0	0	0	0	0
ae157f63656a6016eee7e75b4fab4086	0	693	0	0	0	0	0	0	0	0	0	0	0	0	0	0	0	0	0	0	0	0	0	0	0	0	0	0	0	0	0	0	0	0	0	0	0	0	0	0	0	0	0	0	0	0	0	0	0
bd26496ca69d096748afe99b0833f041	18	17	29	0	0	0	0	0	14	0	0	0	13	0	19	0	0	0	0	113	0	0	0	21	0	0	114	54	0	0	18	0	109	90	0	0	62	17	0	0	28	0	0	35	0	0	0	0	0
52413edf18d7f99e65bf4d6f14ee6ee5	0	0	0	0	0	0	0	0	0	0	0	0	0	0	0	0	14	0	38	129	0	0	0	0	0	0	0	0	0	0	0	0	0	0	0	0	0	0	0	0	0	0	0	0	0	0	0	0	0
e2721102bae25355407b86e0373f789b	0	0	0	0	0	0	0	61	0	0	0	0	0	0	0	0	0	0	0	0	0	0	0	0	0	0	0	0	0	0	0	0	0	0	0	0	0	0	0	0	0	0	0	0	0	0	0	0	0
f78c9c9546b6ca7dff570d889bb27398	0	0	0	0	0	0	0	0	0	0	0	0	0	0	0	0	0	0	0	0	0	0	0	0	0	0	0	0	0	0	0	0	0	0	0	0	0	0	0	0	0	0	0	0	0	0	0	0	0
6bb52c75e5dfbe6857ad7405452679e6	0	0	0	0	0	0	0	0	0	0	0	0	0	0	0	0	0	0	0	0	0	0	0	0	0	0	0	0	21	0	0	0	0	0	0	0	0	0	0	0	0	0	0	0	0	0	0	0	0
fbcbe2239948e560de43b2f1ad2f76ce	0	0	0	0	0	0	0	0	0	0	0	10	0	0	0	67	0	0	0	0	0	0	0	0	0	0	0	0	0	0	0	0	0	0	0	0	0	0	0	0	0	0	0	0	0	0	0	0	0
ce8e58a51565a4758fa23ce5e5d4e851	0	0	0	19	0	0	0	0	0	0	0	0	0	0	0	0	0	0	0	0	0	0	0	0	0	0	0	0	0	0	0	0	0	0	0	0	0	0	0	0	0	0	0	0	0	0	0	0	0
80ccfe3c2cc4a4f750be739c1b8b9f37	0	0	0	0	0	0	0	0	0	0	0	0	0	0	0	0	0	0	0	0	0	0	0	135	0	0	0	0	0	0	0	0	0	0	0	0	0	0	0	0	0	0	0	0	0	0	0	0	0
f9e6c2a53ecb3713315b8c469aa65fa9	0	0	0	0	0	0	445	45	0	156	602	0	60	0	0	146	178	787	0	50	0	0	0	0	0	0	0	76	296	312	0	473	0	0	280	63	0	33	173	74	0	152	0	146	135	154	0	64	0
c73989bf99ea7d1e4abc583fbc40a66b	0	0	0	0	0	0	0	0	0	0	0	0	0	0	0	0	0	0	0	0	0	0	47	0	0	0	0	0	0	37	0	0	0	0	0	0	0	0	0	0	0	0	0	0	0	0	0	0	0
8f06373fe588926fcea53d23df3a2031	0	0	0	0	0	0	0	0	0	99	0	0	0	55	0	0	173	0	0	0	0	0	0	0	0	0	0	0	232	0	97	0	0	0	155	0	0	0	0	0	0	107	0	118	103	0	121	54	0
d879d78486e62293af88c9d7192f37c2	0	0	0	0	0	0	0	0	0	0	0	0	0	0	0	0	0	0	0	0	0	0	0	0	0	0	0	0	0	0	0	0	0	0	0	0	0	0	0	0	0	0	0	0	13	0	0	0	0
b24f3657cd42a6f8cecd360cc54d4dae	0	0	0	0	0	0	0	0	0	0	0	0	0	0	0	0	0	0	0	0	0	0	0	0	0	0	0	0	0	0	0	0	0	0	0	0	0	0	0	0	0	0	0	0	0	0	0	0	0
761013163fddb97ca9ebd3faacd08bcb	0	0	0	0	0	0	0	0	0	0	0	13	0	0	0	0	0	0	0	0	0	0	0	0	0	0	0	0	0	0	0	0	0	0	0	0	0	0	0	0	0	0	0	0	0	0	0	0	0
2aebb2e621816472766616107c531fa2	267	0	15	23	0	27	0	0	0	0	0	0	0	0	0	20	0	0	79	0	0	0	0	0	0	0	0	0	16	38	0	126	1050	31	0	80	104	22	0	60	22	0	0	0	37	0	0	26	0
4357327f74d990f7214abf86aab83bb3	0	48	0	0	0	0	0	0	0	0	0	0	0	0	0	0	0	0	0	0	0	0	0	0	0	0	0	0	0	0	0	0	0	0	0	0	0	0	0	0	0	0	0	0	0	0	0	0	0
0db9d5c341bb7f18f327ea1a5d4b3a5e	0	0	0	0	0	0	0	0	0	0	0	0	0	0	0	0	0	0	0	0	0	0	0	0	0	0	0	0	0	0	0	0	0	0	0	0	0	0	0	0	0	0	0	0	0	0	0	0	0
9efc00cc35036fae880833b2c00ea20a	273	0	0	15	0	0	0	0	0	0	142	0	0	0	0	200	0	0	50	0	0	11	0	0	0	0	0	0	44	8	0	0	0	0	12	44	0	0	0	0	0	30	0	0	19	0	0	0	0
9a2a87d2bbc528926bfadc50dd4a56bf	0	0	0	0	0	0	0	0	0	0	0	0	0	0	0	0	0	0	0	0	0	0	0	0	0	0	60	0	0	0	0	0	0	0	0	0	0	0	0	0	0	0	0	0	0	0	0	0	0
c600c5ce3189a0a227792b301a64ddec	0	14	0	0	17	0	0	0	0	0	0	0	0	0	0	0	0	0	0	0	0	0	26	0	0	0	0	0	0	0	0	0	0	0	0	0	0	0	0	0	0	0	0	0	0	0	0	0	0
a2f95700d156445c06f24527bc2ea0bc	0	0	0	0	0	0	0	0	0	0	0	0	0	0	0	0	0	0	0	0	0	0	0	0	0	0	0	0	0	0	0	0	0	0	0	0	0	0	0	0	0	0	0	17	0	0	0	0	0
5aab9f7b16bd1fec4fc0bb7f60379b34	0	0	0	0	0	0	0	0	0	0	0	0	0	0	0	0	0	0	0	0	0	0	0	0	0	0	0	0	0	0	0	0	0	0	0	0	0	0	0	0	0	0	0	0	0	0	0	0	0
c90f8b317d282b8d762a706fd9e6af38	0	0	0	0	0	41	15	0	23	0	0	0	20	0	0	0	11	0	0	14	0	0	0	0	0	0	0	60	0	0	0	0	0	41	0	0	22	0	0	22	27	0	0	34	0	0	15	0	0
3d2ff7be1629e2d2dee7e92076cf54ff	0	0	34	0	0	0	0	0	46	0	0	0	0	0	0	0	0	0	0	0	0	0	0	0	0	0	0	0	0	0	0	0	0	27	0	0	0	0	0	0	0	0	0	0	0	0	0	0	0
aa63fe884536a91da1a139ba08994531	0	0	10	0	0	0	0	0	8	0	0	0	11	0	0	0	4	0	0	0	0	0	0	0	0	0	0	9	0	0	0	0	0	8	0	0	0	0	0	0	0	0	0	12	0	0	0	0	0
72f8fbcffd68c8b1e00b226a4a5bcd54	0	0	0	0	0	0	0	0	0	0	0	0	0	0	0	0	0	0	0	0	0	0	0	0	0	0	0	0	0	0	0	0	0	0	0	0	0	0	0	0	0	0	0	0	0	0	0	0	0
11c53bb509582acf0f75d7ae5e2707bf	0	0	0	0	0	0	0	0	0	0	0	0	0	0	0	0	0	0	0	0	0	0	0	0	0	0	0	0	0	0	0	0	0	0	0	0	0	0	0	0	0	0	0	0	0	0	0	0	0
0d7a73bbd355d5c464ff60cc4018686a	0	0	0	0	0	0	0	0	0	0	0	0	0	0	0	0	0	0	0	0	0	0	0	0	0	0	0	0	0	0	0	0	0	0	0	0	0	0	0	0	0	0	0	0	0	16	0	0	0
c74d271bbd0ec0cbc64e7a7e111ecea2	0	0	0	0	0	0	0	0	0	0	0	0	0	0	0	0	0	0	0	0	0	0	0	0	0	0	0	0	0	0	0	0	0	0	0	0	0	0	0	0	0	0	0	0	0	0	0	0	0
868eee4319066c6211b6de46b470068c	0	0	0	0	0	0	0	0	0	0	0	0	0	0	0	0	0	0	0	0	0	0	0	0	0	0	0	0	0	0	0	0	0	0	0	0	0	0	0	0	0	0	0	0	0	0	0	0	0
92511ef4ebc6b40652d363480e51a33c	0	0	0	0	0	0	0	0	0	0	0	0	0	0	0	0	0	0	0	0	0	0	0	0	0	0	0	0	0	0	0	0	0	0	0	0	0	0	0	0	0	0	47	0	0	0	0	0	0
c57795282626e531ad26e49e625fa797	0	0	0	0	0	0	0	0	0	0	0	0	0	0	0	0	0	0	0	0	0	0	0	0	0	0	0	0	0	0	0	0	0	0	0	0	0	0	0	0	0	0	0	0	0	0	0	0	0
ecfa4894dea9755ae60f888b467dbdf9	0	0	0	0	0	0	0	0	0	434	0	0	0	0	0	0	0	0	0	0	0	0	0	0	0	0	0	0	0	0	0	0	0	0	0	0	0	0	0	0	0	0	0	0	0	0	0	0	0
891113fc2d680ab7045419165fae73a6	0	0	0	0	0	0	0	0	0	0	0	0	0	0	0	0	0	0	0	0	0	0	0	0	0	0	0	0	0	0	0	0	0	0	0	0	0	0	0	0	0	127	0	0	0	0	0	0	0
90f7af3cb729fc650e499d3bca8102ac	0	38	24	0	22	35	0	67	0	0	16	0	0	0	35	0	45	0	0	0	0	0	0	0	0	0	70	0	11	0	0	0	197	174	0	0	127	0	0	47	0	0	0	50	0	95	0	0	17
ac50855daa8005c36b61a12af40fdd1a	0	0	0	0	0	0	0	0	0	0	0	0	0	0	0	0	0	0	0	0	0	0	0	0	0	0	0	0	0	0	1326	0	0	0	0	0	0	0	0	0	0	0	0	0	0	0	0	0	0
da37604e3aed11ce3a34cddbf4d5f18c	0	0	0	0	0	0	0	0	0	0	0	0	0	0	0	0	0	0	0	0	0	0	0	0	0	0	0	0	0	1080	0	0	0	0	0	0	0	0	0	0	0	0	0	0	0	0	0	0	0
1cd303f07fa8ef77bfa0831cfe6821f8	0	0	0	0	0	0	0	0	0	0	0	0	0	0	0	0	0	0	0	0	0	0	0	0	16	0	0	0	20	0	0	0	0	0	0	0	0	0	0	0	0	0	0	0	0	0	0	0	0
126d319c1196f14521e179496b5f9019	0	0	0	0	0	0	0	0	0	0	0	0	0	0	0	0	0	0	0	0	0	0	0	0	0	0	0	0	0	0	0	0	0	10	0	0	0	0	0	0	0	0	0	0	0	0	0	0	0
7c1858608649abc0829bdf4861a7a748	0	0	0	0	0	0	0	0	0	0	0	0	0	0	0	0	0	0	34	0	0	0	0	0	0	0	0	0	0	0	0	0	0	0	0	0	0	0	0	0	0	87	0	0	66	0	0	0	0
c4f4040b1abbe04c4fc2fbc87563dec7	0	0	0	0	0	0	1724	0	0	0	0	0	0	0	0	95	0	0	0	0	0	0	0	0	0	0	0	0	0	0	0	0	0	0	0	0	0	0	0	0	0	0	0	0	0	0	0	0	0
cfb245e9f81ab12822f925beadaf5cd3	27	704	30	91	895	22	0	366	0	475	11	241	0	282	5	0	327	425	0	0	0	75	27	0	325	221	0	0	1404	0	0	0	14	5	869	18	373	87	0	496	45	293	0	0	216	43	19	16	13
a121dd8c815460c616f33bb5ae7c72f3	51	1709	9	17	1989	25	29	2042	0	51	48	40	4	31	0	23	2	11	54	1	3	12	29	0	24	37	167	0	87	1	253	34	22	21	87	3	61	0	77	6	0	484	0	0	244	242	0	2	8
ca323617523dd88da930514196640e1c	0	0	0	0	0	0	0	35	0	0	0	0	0	0	0	0	0	0	0	0	0	0	0	0	0	0	0	0	0	0	0	83	0	81	0	0	377	1280	0	0	1568	0	0	0	0	0	0	0	69
781d1dcd584ef29113286c5fbe3f268e	37	0	0	0	0	0	0	0	0	0	0	0	0	0	0	0	0	0	0	0	0	0	0	0	0	0	0	0	0	0	0	0	58	0	0	0	0	0	0	0	0	0	0	0	0	0	0	0	0
5eb476bd825b22660b090e042ba6c4b6	0	0	0	0	0	0	0	0	0	0	0	0	0	0	0	0	41	0	0	0	0	0	0	0	0	0	0	0	0	0	0	0	0	0	0	0	0	0	0	0	0	0	0	0	0	0	0	0	0
cf2c680e2fea9018c0363c7721ada9b2	0	50	66	0	64	30	0	23	0	0	0	0	44	0	0	0	34	0	0	127	0	0	0	74	0	0	35	25	0	0	0	0	70	44	0	0	0	12	0	0	32	0	0	83	0	0	0	0	0
de9527b92b362eb40e864e28a14686f2	0	0	0	0	0	11	56	0	0	9	0	209	0	0	0	30	0	0	0	0	0	0	0	0	0	0	0	0	47	0	0	0	0	0	20	0	0	0	0	0	0	0	0	0	0	0	0	0	0
a8504507a6cf7ff4772fb61f72eb705d	0	0	0	0	0	0	0	0	0	0	0	0	0	0	0	0	0	0	0	0	0	0	0	0	0	0	0	0	0	0	0	0	0	0	0	0	0	0	17	0	0	0	0	0	0	0	0	0	0
a83e5d81ca3d1eb9c520ed7f908310d9	0	0	0	0	0	0	0	0	0	0	0	0	0	0	0	0	0	0	0	0	0	0	0	0	0	0	0	0	0	0	0	0	0	0	0	0	0	0	0	189	0	0	0	0	0	0	0	0	0
91e683b35061dbc248d36914ad9b76da	0	486	8	166	496	29	188	268	14	108	46	109	191	109	15	81	150	29	36	0	342	100	147	61	120	52	257	0	269	109	270	61	0	9	228	68	124	17	288	316	7	14	295	7	12	84	0	205	36
34e8cdbcedc0912b8ef0ab8cd1ba902c	121	0	0	0	0	30	0	0	19	0	0	0	9	0	0	0	0	133	0	0	0	0	0	0	0	0	0	0	0	57	0	0	52	18	0	0	83	0	0	0	0	13	0	43	0	27	0	29	0
8d4bcf5498cea63863c8d52dcf18048d	0	0	0	0	0	0	0	0	0	0	0	0	0	0	0	0	0	0	0	0	0	0	24	0	0	0	5	0	0	0	5	0	176	0	0	0	14	0	0	18	0	0	0	0	0	0	0	0	0
d1cc04302e066453f078939a997ff07e	0	0	0	0	0	0	0	0	0	0	0	0	0	0	0	0	0	0	0	0	0	0	0	0	0	0	0	0	0	0	0	0	0	0	0	0	0	0	0	0	0	0	0	0	0	0	0	0	0
d7122df6be43e812b6ecfbb5373e18e5	0	113	0	0	107	23	0	172	15	105	0	0	0	0	0	47	159	0	0	0	0	0	0	0	0	0	0	0	124	0	0	0	0	0	169	0	0	55	0	0	31	0	0	32	0	165	39	0	0
fbc11ef9cc4481c34bc068a591793a9e	0	0	0	0	0	0	0	0	0	0	0	0	0	0	0	0	0	0	0	0	0	0	0	0	0	0	0	0	0	0	0	0	0	0	0	0	0	0	0	0	0	0	0	0	0	0	0	0	0
b87fc1fa7c7c73dae273266169ca10f3	0	0	0	0	0	0	0	0	0	0	0	23	0	0	0	0	0	0	0	0	0	0	0	0	0	0	0	0	0	0	0	0	0	0	0	0	0	0	0	0	0	0	0	0	0	0	0	0	0
64297f0d16fcbc1208869650b605dc4e	0	0	0	0	0	0	0	0	0	0	0	0	0	0	0	0	0	0	0	0	0	0	13	0	0	0	0	0	0	0	0	0	0	0	0	0	0	0	0	0	0	0	0	0	0	0	0	0	0
b855b5c26d8d299124ff5e957abc4af1	0	0	0	0	0	0	0	0	0	0	0	0	0	0	0	0	0	0	0	0	0	0	0	0	0	0	0	0	0	0	0	0	0	0	0	0	0	0	0	0	0	0	0	0	0	0	0	0	0
aee1dae44c1425679f0e33e545e55670	0	0	0	0	0	0	0	0	0	0	0	0	0	0	0	0	0	0	0	0	0	0	0	0	0	0	0	0	0	0	0	0	0	0	0	0	0	0	0	0	0	0	0	0	0	0	0	0	0
3aa1cecce3a5ee81b9d6b8ce7b4bf981	0	0	0	0	0	0	0	0	0	0	0	0	0	0	0	0	0	0	0	0	0	0	0	0	0	0	0	0	0	0	90	0	0	0	0	0	0	0	0	0	0	0	0	0	0	0	0	0	0
e88b6ff806dc37b38c6ab4d5cf8055d5	152	176	138	169	136	205	64	42	219	31	288	0	596	185	919	148	126	87	238	43	76	167	54	42	117	271	0	0	81	427	41	146	157	147	53	47	1493	363	119	323	340	499	65	66	342	136	314	76	191
bc38910191e63070dfd4eb307cc330fc	0	81	0	0	86	0	0	0	0	0	0	8	0	0	0	0	0	0	0	0	0	0	0	0	0	0	0	18	0	0	0	0	0	0	0	0	0	0	0	48	0	0	0	15	0	11	0	0	0
b48b4d3ac8f606cdca7cb366e32501e1	0	0	0	0	0	0	0	0	0	0	0	0	0	0	0	0	0	0	0	0	0	0	0	0	0	0	0	0	0	0	0	0	0	162	0	0	0	0	0	0	0	0	0	0	0	0	0	0	0
e87be1d7c61d1239f598a61de64b1876	0	0	0	0	0	0	0	0	0	0	0	0	0	0	0	0	0	0	0	0	0	0	0	0	0	0	0	0	0	0	0	0	0	0	0	0	0	0	0	0	0	0	0	0	0	0	0	0	24
e35a2906899693f4beb986ae5a4daecd	0	0	0	0	0	0	0	0	0	0	0	0	0	0	0	0	0	0	0	0	0	0	0	0	0	0	0	0	0	0	0	0	0	0	682	0	0	0	0	0	0	0	0	0	0	0	0	0	0
9b2959552616c76bdb931efe1596a003	0	0	0	0	0	0	0	0	0	0	0	0	0	0	0	0	0	0	0	0	0	0	0	0	0	0	0	0	0	0	0	0	0	0	0	0	0	0	0	0	0	0	0	84	0	0	0	0	0
254ca78c33b236e5b32eb7b1ed04cbf3	0	0	0	0	0	0	0	0	0	15	0	0	0	0	0	0	0	0	0	0	0	0	0	0	0	0	0	0	0	0	0	0	0	0	0	0	0	0	0	0	0	0	0	0	0	0	0	0	0
c908ca628e3d168010e9042d0f93ab0a	0	0	0	0	0	0	0	0	0	0	0	0	0	0	0	0	0	0	0	0	0	0	0	0	0	0	0	0	0	0	0	0	0	0	0	0	0	0	0	174	0	0	0	0	0	0	0	0	0
796c58053f9d730dbfa4ee6dc90f8abb	0	0	0	0	0	0	0	0	0	0	0	0	0	0	0	0	0	0	0	0	0	0	0	0	33	0	0	0	30	0	0	0	0	0	24	0	0	0	0	0	0	0	0	0	0	0	0	0	0
1928c9a33b4c056374600265b20f4d6d	0	0	0	0	0	0	0	0	0	0	0	0	80	0	34	0	0	0	0	0	0	0	0	0	0	0	0	0	0	0	0	0	0	0	0	0	0	0	0	0	36	0	0	0	0	0	0	0	0
90d5a5cfaf2e28a921f2471e461ccacd	0	26	0	0	35	0	36	0	0	0	0	0	14	0	0	0	0	0	0	0	0	0	0	32	0	0	0	0	0	0	0	0	0	0	0	0	22	0	17	0	9	0	0	20	0	0	0	0	0
bdb7c5c8c930608b08a3f613a5db6085	0	0	0	0	0	0	0	0	0	13	0	0	0	0	0	0	0	0	0	0	0	0	0	0	0	0	0	0	0	0	0	0	0	0	0	0	0	0	0	0	0	0	0	0	0	0	0	0	0
7903350e7d0f37517725b594c5917264	0	0	0	0	4	0	0	0	0	0	0	0	0	13	0	0	0	0	25	0	0	0	0	8	0	6	0	0	0	0	0	0	0	0	0	0	0	0	0	37	0	5	0	0	4	27	0	0	0
2d311bf52a6a9fcee639a9f40ab82311	0	0	0	0	0	0	0	0	0	0	0	0	0	0	0	0	0	0	0	0	0	0	0	0	0	0	0	0	0	0	0	0	0	0	0	0	0	0	0	0	0	0	0	0	0	0	0	0	0
a7f8038fdac68a747a0c0f7a3ea5d1c7	551	41	108	557	60	192	466	48	386	54	425	95	335	109	463	117	95	220	319	84	495	307	16	131	557	96	692	372	259	81	352	335	51	634	128	133	187	440	78	469	579	347	189	720	373	631	553	328	233
c1bcaf35b6340ac4b7516e36023f4b07	0	0	0	43	0	0	0	0	31	16	25	0	0	0	50	42	0	0	66	188	62	0	0	0	0	0	0	0	71	0	32	0	0	0	51	48	0	55	0	0	71	0	0	0	0	0	0	0	0
28cedf9b90a7d850797259faeb061188	0	0	0	0	0	0	0	0	0	0	0	0	0	0	0	0	0	0	0	0	0	0	0	0	0	0	0	0	0	0	0	0	0	0	0	0	0	0	0	33	0	0	0	0	0	0	0	0	0
909193d1d1316a3785183b2dfad6aa78	93	39	54	196	39	26	37	35	45	0	0	0	52	0	52	91	30	37	157	145	59	144	42	65	114	0	552	64	105	57	168	30	31	84	49	59	163	46	0	353	43	69	86	183	39	118	86	83	46
3a6903f6a7405506680d41a079757e5b	0	0	0	0	0	0	0	0	0	0	0	0	0	0	0	0	0	0	0	0	0	0	0	0	0	0	0	0	0	0	0	0	0	0	0	0	0	0	0	0	0	0	0	0	33	0	0	0	0
b8b6a7348b7707f95c4cd2bca442722c	120	0	132	0	0	138	0	163	0	72	0	1044	0	0	0	0	1	0	0	115	0	0	102	13	1218	0	0	183	227	0	0	4	0	0	126	165	0	215	0	0	191	0	0	830	0	2837	0	42	2
b9a3d1fda3cb4c19a763e2eecbb5a002	0	0	0	0	0	0	0	0	0	0	0	0	0	0	0	0	0	0	0	0	0	0	0	0	0	0	0	0	0	0	0	0	0	0	0	0	152	0	0	0	0	0	0	0	0	0	0	0	0
bf446569bd14c89936e8f57613a132bf	0	0	0	0	0	0	0	0	0	0	0	0	0	0	0	0	0	0	0	0	0	0	0	0	0	0	0	0	0	0	0	0	0	0	0	0	0	0	0	0	0	0	0	0	0	0	0	10	0
b95897bd69624085e3a841a0058ee8c2	0	0	0	0	0	0	0	0	0	0	0	0	0	0	8	0	0	0	0	10	0	0	0	0	0	0	0	23	0	0	0	0	0	0	0	0	0	0	0	0	0	0	0	0	0	0	0	0	39
893eb09227f944f28509c83e442a64b1	0	0	0	0	0	0	0	0	0	0	0	0	0	0	0	0	0	0	0	0	0	0	0	0	0	0	0	0	0	0	0	0	0	0	0	0	0	217	0	0	0	0	0	0	0	0	0	0	0
7a83f63ff03a32e886fab1e1e0130487	0	0	0	0	0	0	0	0	0	0	0	0	0	0	0	0	0	0	0	0	0	0	0	0	0	0	0	0	0	0	0	0	0	0	0	195	0	0	0	0	0	0	0	0	0	0	0	0	0
585a27651a7eeedba7e8eab0cc1e9c4b	0	0	0	0	0	0	0	0	0	0	0	0	0	0	0	0	0	0	0	0	0	0	0	0	0	0	0	10	0	0	0	0	0	0	0	0	0	0	0	0	0	0	0	32	0	0	0	0	0
31168d43151d521f3e290a8d928b87e5	0	0	0	0	0	0	0	0	0	0	0	0	0	0	0	0	0	0	0	0	0	0	0	97	0	0	0	78	0	0	0	0	201	0	0	0	99	0	0	0	0	0	0	0	0	0	0	0	0
57e1759af9ecd51c4b648af8d5947e83	0	0	0	0	0	0	0	0	0	0	0	0	0	0	0	0	0	0	0	37	0	0	0	0	0	0	0	0	0	0	0	0	0	0	0	0	0	0	0	0	0	0	0	0	0	0	0	0	0
fa9d086cab367d730848aa168ad43261	0	19	13	21	0	80	8	0	0	16	0	0	21	0	0	8	0	12	296	26	0	0	384	17	100	0	0	0	102	0	0	29	0	29	40	0	13	0	0	36	0	107	37	0	70	27	93	53	0
1b06fc14147a4e38d75bdcfb90a9ce75	0	0	0	0	0	0	0	0	0	0	0	0	74	0	0	0	0	0	0	0	0	0	0	0	0	0	0	0	0	0	0	0	0	0	0	0	0	0	0	0	0	0	0	0	0	0	0	0	0
37ceacb48291aedcf9335b65e7022935	696	186	125	605	215	0	28	94	0	51	544	1855	84	235	0	127	24	79	1281	446	0	824	102	0	799	111	898	0	371	1946	695	818	48	0	125	392	857	720	77	425	722	667	87	0	419	1007	0	348	0
8cb3f003e86b1639c2ad35874a010d70	0	0	0	0	0	0	0	0	0	0	0	0	0	0	0	0	0	0	0	0	0	0	0	0	0	0	0	0	0	0	0	0	0	15	0	0	0	0	0	0	0	0	0	0	0	0	0	0	0
d460b8c54f6b96d459293cc1b1fce51d	0	0	0	0	0	0	0	0	0	0	0	0	0	0	0	0	0	0	0	0	0	0	0	0	0	0	0	0	0	0	0	0	0	0	0	0	0	0	0	0	0	230	0	0	0	0	0	0	0
222f9f40cfe464cdef7f789c30e8a902	0	0	0	0	0	0	0	0	0	0	0	0	0	0	0	0	0	0	0	0	0	0	0	0	0	0	0	0	0	0	0	0	0	82	0	0	0	0	0	0	0	0	0	0	0	0	0	0	0
3e8131339841530f1579d4331c69e5cd	0	0	0	0	0	0	0	0	0	0	0	0	0	0	0	0	0	0	0	0	0	0	0	0	0	65	0	0	0	0	0	0	0	0	0	0	0	0	0	0	0	0	0	0	0	0	0	0	0
01551b26d13e18f15614806f2ec6a2b4	0	0	0	0	0	0	0	0	0	0	0	0	0	0	0	0	0	0	0	0	0	0	0	0	0	0	0	0	0	0	0	0	0	0	0	0	0	0	0	16	0	0	0	0	0	0	0	0	0
1fbc7bd33aa972b70654c5a4263e9c01	0	0	0	0	0	0	0	0	28	0	0	0	0	0	0	0	0	0	0	0	0	0	0	0	0	0	0	0	0	0	0	0	0	0	0	0	0	0	0	0	26	0	0	0	0	0	0	0	0
46bc93c4ceb4f213aaab0a4307fb3c26	44	30	83	404	14	6	270	22	0	89	633	0	0	25	0	334	0	0	11	0	0	276	2282	0	30	31	0	0	221	497	0	17	136	0	90	15	486	0	1066	3557	0	191	1	0	112	196	70	0	0
bd690fc930aced63f426e4a174fa8863	48	11	0	0	19	29	5	20	0	0	10	0	0	0	0	0	0	0	0	21	0	0	6	12	0	0	13	15	0	0	0	0	247	21	0	5	63	0	0	36	12	0	0	23	0	0	0	0	0
112c0f0bf08ca28d6313e2be530c7593	0	0	0	72	0	0	36	0	0	0	0	0	0	56	0	12	72	0	0	62	0	39	0	0	0	22	0	0	0	0	0	17	0	0	0	0	0	9	0	0	0	18	0	0	0	0	0	0	0
c83e4cc6573a70355e06fbe46473a8f9	0	0	0	0	0	0	0	0	0	0	0	0	0	0	0	0	0	0	0	0	0	0	61	0	22	0	0	0	0	99	0	0	0	0	0	0	0	0	0	0	0	20	0	0	9	0	0	0	0
cc95aeb44bd8b4593686f272677f433b	0	0	0	0	0	0	0	0	0	0	0	0	0	0	0	0	0	0	0	0	0	0	0	0	0	0	0	0	0	0	0	19	0	0	0	0	0	0	0	0	0	0	0	0	0	0	0	0	0
305578cde2c60093a560183d6ac7e66b	576	644	1179	1967	642	1456	872	446	1331	91	1168	247	1113	1086	2983	821	488	526	2786	977	1251	1603	2247	1040	993	396	898	1378	400	615	1579	1104	148	710	238	453	2087	1347	268	1721	1245	1977	77	1860	1802	658	1819	462	581
7c5973b7f1050e47564780aed2a86c87	5	0	0	0	0	0	0	0	0	0	0	0	0	0	0	0	0	0	0	0	0	0	0	0	0	0	0	0	0	0	0	0	0	0	0	0	0	0	0	0	0	0	0	0	0	0	0	0	0
cd7e01381bcc7f0ef66ab2bd13d3a8e6	86	0	106	0	0	0	0	27	0	0	0	0	0	0	0	0	0	30	0	67	0	0	0	0	0	0	0	20	0	59	0	56	0	0	0	0	0	40	52	214	49	67	0	0	42	56	44	22	0
04bca94ee8814a25d2fc37a9d8bdfb43	0	0	0	0	0	0	0	0	0	0	0	0	0	0	0	0	0	0	0	0	0	0	0	0	0	0	0	0	0	0	0	0	0	0	0	0	0	0	0	0	0	0	0	0	0	0	0	0	0
410ea175f3b0b2354f70add833721b73	119	0	0	88	0	28	0	163	84	0	259	0	57	53	88	57	0	68	67	35	66	80	0	215	227	28	141	0	89	217	282	19	231	0	62	55	356	0	53	332	47	142	193	273	71	127	84	127	214
8e4288b433282af19d846ca0ddf92082	0	18	0	159	30	32	0	0	0	0	0	0	0	0	0	0	0	0	36	0	0	138	93	0	0	0	0	0	0	0	31	0	0	0	0	0	0	0	19	78	0	0	244	0	0	0	0	0	0
1121ed3d2cb8ec44fe38b50db1a8ec65	0	0	0	0	0	0	0	0	0	0	0	0	0	38	0	0	0	0	0	0	0	0	0	0	0	43	0	0	0	0	0	0	0	0	0	0	0	0	0	0	0	162	0	0	107	0	0	0	0
4be43195f57786416c94d4a1bdd796d9	0	0	0	0	0	0	0	0	0	0	0	0	0	0	0	0	0	0	0	0	0	0	0	0	0	0	0	0	0	0	0	353	0	0	0	0	0	0	0	0	0	0	0	0	0	0	0	0	0
58ee69dec05550980403a86c497c6af2	0	100	0	0	0	0	0	0	0	0	0	0	0	0	0	0	0	0	0	0	0	0	0	0	0	0	0	0	0	0	0	0	0	0	0	0	0	0	0	0	0	0	0	0	0	0	0	0	0
6657c0e5e27506809598b1cff6e944c3	0	0	0	0	0	0	0	0	0	0	0	0	0	0	0	0	0	0	0	0	0	0	0	0	0	0	0	0	0	0	0	0	0	0	0	0	0	0	0	0	0	0	0	0	0	0	0	0	0
ca920f660e3d265923f939bcd951cd6c	0	0	0	0	0	0	0	0	0	0	0	0	0	0	0	0	0	0	0	0	0	0	0	0	0	0	0	0	0	0	0	0	19	0	0	0	0	0	0	0	0	0	0	0	0	0	0	0	0
8706b8a89783e2e168d58990ae7b3936	0	0	0	0	0	0	0	0	0	0	0	0	0	0	0	0	0	0	0	0	0	0	0	0	0	0	0	0	0	0	0	0	0	0	0	0	0	0	0	0	0	0	0	0	0	52	0	0	0
46b17acb096cbdbd81ba8aae9b1c2c9a	0	0	0	0	0	0	0	0	0	0	0	0	0	0	0	0	0	0	0	0	0	0	0	0	0	0	0	0	0	0	0	0	0	0	0	37	0	0	0	0	0	0	0	0	0	0	0	0	0
b983efc658260d79e8aa1892b1d25521	0	0	0	0	0	0	0	0	0	0	0	0	0	0	0	27	0	0	0	0	0	0	0	0	0	0	0	0	0	0	0	0	0	0	0	0	0	0	0	0	0	0	0	0	0	0	0	0	0
241ff551bf00f7f8774bc297edd5c756	0	0	0	0	0	0	0	0	0	0	0	0	0	0	0	0	0	0	0	0	0	0	0	0	0	0	459	0	0	0	0	0	0	0	0	0	0	0	0	0	0	0	0	0	0	0	0	0	0
3898afd2030a57bb2d6883b5d1e6c644	0	0	0	0	0	0	0	0	0	0	0	0	0	0	0	0	0	0	0	0	0	0	0	0	0	0	0	0	18	0	0	0	0	0	0	0	0	0	0	0	0	0	0	0	0	0	0	0	0
c6292093a59aa6bbe347d7b428c9d1f7	0	0	0	0	0	0	0	0	0	0	0	0	0	0	0	0	0	0	0	103	0	0	0	0	0	0	0	0	0	0	0	0	0	0	0	0	0	0	0	0	0	0	0	0	0	0	0	0	0
df1590a8f674ab0098f9c30253496037	0	0	0	0	0	0	0	113	0	0	0	0	0	0	0	0	0	0	0	0	0	0	0	0	0	0	0	0	0	0	0	0	0	0	0	0	0	0	0	0	0	0	0	0	0	0	0	0	0
c5bb1abea907986bc496a25c0f9f9be9	0	0	0	0	0	0	0	0	0	0	0	0	0	0	0	0	0	0	0	0	0	0	0	0	0	0	0	0	0	0	0	0	0	0	0	0	0	0	0	0	0	0	0	0	0	0	0	0	0
38b55ed594153b8bb2d949bb14cec0ec	0	0	0	0	0	0	0	0	0	0	0	0	0	0	0	0	0	0	0	0	0	0	0	0	0	0	0	0	0	0	0	0	0	0	0	0	0	0	0	0	0	0	0	0	0	0	0	0	0
e588b99077a83f5d3eb2eb4c131495ec	0	0	0	0	0	0	0	0	0	0	0	0	0	0	0	0	0	0	0	0	27	0	0	0	0	0	0	0	0	0	0	0	0	0	0	0	0	0	0	0	0	0	0	0	0	0	0	0	0
f92974bc8301450e0404a1ecf1124bcf	0	0	0	0	0	9	0	47	0	0	0	17	11	0	0	0	17	0	0	0	0	0	0	0	135	0	0	0	0	0	0	50	0	14	0	0	0	0	0	0	0	0	0	0	0	22	0	0	0
290a1cca7b3b9a5397824ecad2b31b6f	0	304	0	57	329	17	24	234	0	0	26	331	0	466	0	14	0	0	373	0	0	68	0	0	0	180	522	0	67	230	2354	45	306	0	19	12	1551	52	0	702	45	100	103	0	37	120	0	113	0
09b2e6c018bf8ddccfe85dffe889787e	0	0	0	1	0	0	0	0	0	0	0	0	0	0	0	0	0	0	0	0	0	2	0	0	0	0	0	0	12	2	0	0	1	0	19	0	1	0	0	54	0	0	0	0	0	3	0	0	0
ba3b726553d5a06be3112a65897c6dda	0	0	0	0	0	0	0	0	0	0	0	0	0	0	0	0	0	0	0	0	0	0	51	0	0	0	0	0	0	0	0	0	0	0	0	0	0	0	0	0	0	0	0	0	0	0	0	0	0
5ff50b1d1c508d38b4130b9623089f58	0	0	0	0	0	0	0	0	0	0	0	0	0	0	0	0	0	0	0	0	0	0	0	0	0	0	0	0	0	0	0	0	0	0	0	0	85	0	0	0	0	0	0	0	0	0	0	0	0
ba1df8882b31c772553516c1e06dea0d	281	0	0	571	0	0	0	0	0	230	113	0	0	421	0	487	0	892	223	0	255	330	0	0	647	407	0	0	526	175	0	107	0	0	495	0	127	0	141	0	0	478	137	0	470	53	0	189	0
796c0e6506ec37d374002a1b203dc7ed	0	0	0	0	0	0	0	0	0	0	0	0	0	0	0	0	0	0	0	0	18	0	0	0	0	0	0	0	0	0	0	0	0	0	0	0	0	0	0	0	0	0	0	0	0	0	0	0	0
cebd4fb3b556a36e244113f59bdd4a9f	0	2040	7264	149	2041	0	209	1162	0	10	90	81	308	133	0	0	0	0	0	957	0	110	160	0	0	43	0	1115	26	34	0	0	9017	0	71	335	557	706	105	98	1274	199	0	413	68	63	935	0	1612
e95f85a966ce49be2489ea75a1e70647	65	0	31	0	0	226	0	173	128	0	0	0	0	0	21	57	0	0	0	0	0	0	0	68	0	0	0	200	0	0	0	0	0	102	0	0	0	143	0	0	153	1490	0	193	1151	0	70	0	0
4dca6879b9b9b483d85ce28331fadcf1	0	0	0	0	0	0	0	0	0	0	0	0	0	0	0	55	0	0	0	0	0	0	0	0	143	0	0	0	0	137	0	0	0	0	0	0	0	0	0	67	0	37	0	0	0	0	0	0	0
2efcc953dc322e860fc51501357fd670	0	0	0	0	0	0	0	0	0	0	0	0	0	0	0	0	0	0	0	0	0	0	0	0	0	0	0	10	0	0	0	0	0	0	0	0	0	0	0	0	0	0	0	7	0	0	0	0	0
5c2aa656b8df1d58a5e2ea1762f7e405	0	0	0	0	0	0	0	0	0	0	0	0	0	0	0	0	0	0	0	0	0	0	0	0	0	0	0	0	0	0	118	0	0	0	0	0	0	0	0	0	0	0	0	0	0	0	0	0	0
064c5e0781302f240aaa601cd6efbc18	0	108	0	0	0	0	0	0	0	0	0	0	0	0	0	0	0	0	0	0	0	0	0	0	0	0	0	0	0	0	0	0	0	0	0	0	0	0	0	0	0	0	0	0	0	0	0	0	0
be06d6ef673cfb1a9a8e63401b658a0f	0	0	0	0	0	0	0	0	0	0	0	0	0	0	0	0	256	0	36	12	0	0	0	0	0	0	0	32	0	0	0	0	0	0	0	0	0	0	0	59	0	0	0	0	0	65	0	0	0
c1339bf0526276ef930bcfa6f9c63278	0	0	0	0	0	0	0	0	0	0	0	0	0	0	0	0	0	0	0	0	0	0	0	0	0	0	1953	0	0	0	0	0	0	0	0	0	0	0	0	0	0	0	0	0	0	0	0	0	0
a92e50953ce3854a0c1b9f9f8258c8ed	0	0	0	0	0	49	0	0	0	0	0	0	0	0	0	0	0	0	0	0	0	0	0	0	0	0	0	0	0	0	0	0	0	0	0	0	0	0	0	0	0	0	0	0	0	0	0	0	0
da8ef913ffe5d6ec767eec5f522f1fe1	0	0	0	0	0	0	0	0	0	0	0	0	0	0	0	0	0	0	0	0	0	0	0	0	0	0	0	0	0	0	0	0	0	0	0	0	0	0	0	0	0	0	0	0	0	0	0	0	0
44625bb7ffd6c7d340d9dffa3a29b9e5	0	0	0	0	0	0	0	0	0	0	0	0	0	0	0	0	0	0	0	0	0	0	0	0	0	0	0	0	0	0	0	0	0	0	0	0	0	0	0	0	28	0	0	0	0	0	0	0	0
6e06d4852ed2f300bf0ec62ca92be1cf	0	0	0	0	0	0	0	0	0	0	0	0	0	0	0	0	0	0	0	0	0	0	0	0	0	0	0	0	0	0	0	0	0	0	0	0	0	0	0	0	0	0	0	0	0	0	0	0	0
c13399827cccd6e8e39a705dd0ebb189	0	0	0	0	0	0	0	0	0	0	0	18	0	0	0	0	0	0	0	0	0	0	0	0	0	0	0	0	0	0	0	0	0	0	0	0	0	0	0	0	0	0	0	0	0	0	0	0	0
32f27ef40ffc3a54bc187b0f92b30574	0	0	0	0	0	0	0	0	0	0	0	0	0	0	0	0	0	0	0	0	0	0	0	0	0	0	0	0	0	0	0	0	0	0	0	0	0	0	0	0	0	0	0	0	0	0	0	0	0
060c37ca6bb393b6bd67363bc9a461a4	0	0	0	0	0	0	0	0	0	0	0	0	0	0	0	0	0	0	0	0	0	0	0	0	0	0	0	0	0	0	0	0	0	0	0	0	0	0	0	0	0	0	0	0	0	0	0	0	0
d7174fb643e33630d32c8b78cbfca3e4	0	0	0	0	0	0	0	0	0	0	0	0	0	0	0	0	0	0	0	0	0	0	0	0	0	34	0	0	0	0	0	0	0	0	0	0	0	0	0	0	0	0	0	0	0	0	0	0	0
a55257b11c8f92a4e22daf1103a7ead8	0	0	0	0	0	0	0	0	0	0	0	0	0	0	0	0	0	0	0	0	0	0	0	0	0	0	0	0	0	0	0	0	0	0	0	0	0	0	0	0	0	0	0	0	0	0	0	0	0
ff400688418f7e09b7d15a6f69c731eb	0	0	0	0	0	0	0	0	0	0	0	0	0	0	0	0	0	0	0	0	0	0	0	0	0	0	0	0	0	0	0	0	0	0	0	0	0	0	0	0	0	0	0	0	0	0	0	0	0
4f98edad7389722fbd544262e82000b1	0	40	0	0	0	0	0	0	0	0	0	0	0	0	0	0	0	0	0	0	0	0	0	0	0	0	0	0	0	0	0	0	0	0	0	0	0	0	0	0	0	0	0	0	0	0	0	0	0
e6045261af32e05971ceb9fedadbf315	0	0	0	0	0	0	0	0	0	0	0	0	0	0	0	0	0	0	0	0	0	0	0	0	0	0	0	0	0	0	0	0	0	0	0	0	0	0	0	0	0	0	0	0	0	0	0	0	0
762b9899626b3d5f34f05e18de4db2a4	0	0	0	0	0	0	0	0	0	0	0	0	0	0	0	0	0	0	0	0	0	20	0	0	22	0	0	0	0	0	0	0	0	0	0	0	0	0	0	0	0	0	0	0	0	0	0	0	0
6e366b55df6b9e51d04ee0231f7d11f0	0	0	0	0	0	0	0	0	0	0	0	0	0	0	0	0	0	0	0	0	0	0	0	0	0	0	0	0	236	0	0	0	0	0	0	0	0	0	0	0	0	0	0	0	0	0	0	0	0
56a6e9674c1b77531d29d9008d5e4709	0	0	0	0	0	0	0	0	0	0	0	0	0	0	0	0	0	0	0	0	0	159	0	0	0	0	0	0	0	0	0	0	0	0	0	0	0	0	0	0	0	0	0	0	0	0	0	0	0
7121216974625d3e952016ffd6b43cb4	0	0	0	0	0	0	0	0	0	0	0	0	0	0	0	0	0	158	0	0	121	0	0	0	7	0	0	0	0	0	0	0	0	0	0	0	0	0	0	0	0	0	0	0	0	0	0	0	0
75d48d764ffeed0ed693a34d92bc2b7f	0	34	0	0	42	10	0	17	26	8	0	11	39	57	55	0	0	0	0	0	0	0	63	0	72	52	0	0	5	0	0	0	0	179	10	0	0	11	0	0	8	0	0	0	0	0	0	0	0
ad6f4ebaaf0f24b4af17983f3d32bc3d	0	10	0	0	0	0	0	0	0	0	0	0	0	0	0	0	0	0	0	0	0	0	0	0	0	0	0	0	0	0	0	0	0	0	0	0	0	0	0	0	0	0	0	0	0	0	0	0	0
1e854f4e6ad98438b3a7a48896cdb752	0	0	0	0	0	0	0	0	0	0	0	0	0	0	0	0	0	0	0	0	0	0	0	0	0	0	0	0	0	0	0	0	0	0	0	0	0	0	0	0	0	0	0	0	0	0	0	0	0
35d9b447bdd6f06cd693f6c9cf2b6ffb	0	0	0	0	0	0	0	0	0	0	0	0	0	0	0	0	0	0	0	0	5	0	0	0	0	0	0	0	0	0	0	0	0	0	0	0	0	0	0	0	0	0	0	0	0	0	0	0	0
8b143aebcd4e790f4d77672c9f97b38b	0	0	0	0	0	0	0	0	0	0	0	0	0	0	0	0	0	0	0	0	0	0	0	0	0	0	0	0	0	0	0	89	0	0	0	0	0	0	0	0	0	0	0	0	0	0	0	0	0
ffbbb8e29aa5f02ccb51cda6a32a7665	0	0	0	0	0	0	0	0	0	0	0	0	0	0	0	0	0	0	0	14	0	0	0	0	0	0	0	0	0	0	0	0	0	0	0	0	0	0	0	0	0	0	0	0	0	0	0	0	0
2a1a5641c9943c3f6af768842590c43e	0	0	0	0	0	0	0	0	0	0	0	0	0	0	0	0	0	0	0	0	0	0	0	0	0	0	0	0	0	0	0	0	73	0	0	0	0	0	0	0	0	0	0	0	0	0	0	0	0
9ef7e171401c601952a4c68dfe6d5439	0	0	0	0	0	0	0	0	0	0	0	0	0	0	0	0	0	0	0	343	0	0	0	0	0	0	0	0	0	0	0	0	241	0	0	0	0	0	0	0	0	0	0	0	0	0	0	0	0
c9570777e6b1f49ab8f4654ea9b66848	0	0	0	204	0	33	47	45	47	16	233	0	0	16	0	0	0	0	1498	94	0	122	0	0	102	0	0	216	166	217	0	282	966	0	61	78	115	56	0	121	47	212	53	0	178	62	0	106	0
19026b4d8e6927ec25cf6979f3fbaeaf	0	0	0	0	0	0	0	10	0	0	0	0	0	0	0	0	0	0	0	0	0	0	0	0	0	0	0	0	0	0	0	0	0	0	0	0	0	0	0	0	0	0	0	0	0	0	0	0	0
2efb3fc1ea30772a261387c7f9b52256	0	0	0	0	0	0	0	0	0	0	0	0	0	0	0	0	0	0	0	0	0	0	398	0	0	0	0	0	0	0	0	0	0	0	0	0	0	0	0	0	0	0	0	0	0	0	0	0	0
b54ecd892c25aaa9d7eb7ccef5e2f56f	0	0	0	0	0	0	0	0	0	0	0	0	0	0	0	0	0	0	0	0	0	0	0	0	0	0	0	0	0	0	0	0	0	0	0	0	0	0	0	0	0	0	0	0	0	0	0	0	0
523de7ef319163b3b52d6c1e297d7ff0	0	0	0	0	0	0	0	0	0	0	0	0	0	0	0	0	0	0	0	0	0	0	0	0	0	0	0	0	0	0	0	0	0	0	0	0	0	0	0	0	0	0	0	0	0	0	0	0	0
fa4e1dcd6e4c99c6e87114d669689296	0	0	0	0	0	0	0	0	0	0	0	0	0	0	0	0	0	0	0	0	0	0	0	0	0	0	0	0	0	0	0	0	0	0	0	0	54	0	0	0	0	0	0	0	0	0	0	0	0
e5d995e2879e787b2fccd32b3d252843	0	0	0	0	0	0	0	0	0	0	0	0	0	0	0	0	0	0	0	0	0	0	0	0	0	0	0	0	0	0	0	0	32	0	0	0	0	0	0	0	0	0	0	0	0	0	0	0	0
eb3bf4a83954d8363e2aa1538d854785	0	0	0	0	0	0	0	0	0	0	0	0	0	0	0	0	0	0	0	0	30	0	0	0	0	0	0	0	0	0	0	0	0	0	0	0	0	0	0	0	0	0	0	0	0	0	0	0	0
6ba989eb78f5f9761f9435c9a57b0506	0	0	36	0	0	0	0	0	0	0	0	0	0	0	0	0	0	0	0	0	0	0	0	0	0	0	0	0	0	0	0	0	0	0	0	0	0	0	0	0	0	0	0	0	0	0	0	0	0
3a032abce4d8cab7819d05c05ea2f814	0	128	0	0	63	0	0	0	0	0	0	0	0	0	0	0	0	0	0	0	0	0	0	0	0	0	0	0	0	0	0	0	0	0	0	0	0	0	0	0	0	0	0	0	0	0	107	0	0
83bc4d9d51260337afcaa0565177bf3f	0	0	0	0	0	0	0	0	0	0	0	0	0	0	0	0	0	0	0	0	0	0	0	0	0	0	0	0	153	0	0	0	0	0	0	0	0	0	0	0	0	0	0	0	0	0	0	0	0
a3e42a6266b85bee031d3b9441318f93	0	0	0	0	0	0	0	0	0	0	0	0	0	0	0	0	0	0	0	0	0	0	0	0	12	0	0	0	0	0	0	0	0	0	0	0	0	0	0	0	0	0	0	0	0	0	0	0	0
623cb2d3dc39ef5a8375fa5e45c9f2a7	0	0	53	0	0	0	0	0	0	0	0	0	0	0	0	0	0	0	0	0	0	0	0	0	0	0	0	0	0	0	0	0	0	0	0	0	0	0	0	0	0	0	0	0	0	0	0	0	0
e92505d21d2e9084995f3d3bad273ff9	0	188	0	0	196	0	0	0	0	86	0	11	0	0	0	0	0	0	0	0	0	0	130	73	0	0	0	0	382	0	0	0	0	0	264	0	0	35	0	0	24	0	0	0	0	932	0	0	5
431f9959101bd25852150b58c7d197a1	0	666	0	404	657	0	202	221	0	282	137	0	255	138	0	71	94	421	0	0	371	253	284	353	203	151	469	0	705	143	467	0	0	0	471	96	197	0	537	244	0	594	0	0	312	266	0	121	0
b33e4eda4ca3a62ba80ca37efec3a799	0	188	0	0	192	0	0	0	0	0	0	0	0	0	0	0	0	0	0	0	0	0	0	0	0	0	0	0	0	0	0	0	0	0	0	0	0	0	0	0	0	0	0	0	0	0	0	0	0
7d5c2d1241ff918afb3fa6310a4aa293	0	0	31	0	0	0	0	0	0	0	0	0	0	25	0	0	0	0	0	0	0	0	0	0	0	0	0	37	0	0	0	0	0	0	0	5	0	0	36	0	0	0	0	0	0	0	0	0	5
21989c018460f455dc2da63b47b03d87	0	0	0	0	0	0	0	0	0	0	0	0	0	0	0	0	0	0	0	0	0	0	0	0	0	11	0	0	0	0	0	0	0	0	0	0	0	0	0	0	0	0	0	0	0	0	0	0	0
d7d2ed05f17d09c0212eaaa66774f059	0	0	0	0	0	0	0	0	0	0	0	0	0	0	0	17	0	0	0	0	0	0	0	0	0	0	0	0	0	0	0	0	0	0	0	0	0	0	0	0	0	0	0	0	0	0	0	0	0
bcf8dd8dca8cf0f49f9ee1feaba3a67b	0	0	0	0	0	0	0	0	0	0	0	0	0	0	0	0	0	0	0	0	0	0	0	0	0	0	0	0	0	0	0	0	0	0	0	0	0	0	0	0	0	0	0	0	0	0	0	0	0
6159be61070819e276fc843c7c7c479e	0	0	0	0	0	0	0	0	0	0	0	0	0	0	0	0	0	0	0	0	0	0	0	0	0	0	0	0	0	0	0	0	0	0	0	0	0	0	0	0	0	0	0	0	0	0	0	0	0
7dfe4d968511a902a23249912fec1202	0	0	0	0	0	0	0	0	0	0	0	0	0	0	0	0	0	0	0	0	0	0	946	0	0	0	0	0	0	0	0	0	0	0	0	0	0	0	0	0	0	0	0	0	0	0	0	0	0
ee96f47f032cee6a9fe886071010fa43	0	0	0	0	0	0	0	0	0	0	0	0	0	0	0	0	0	0	0	0	0	0	0	0	0	0	0	0	0	0	0	0	0	0	0	568	0	0	0	0	0	0	0	0	0	0	0	0	0
83b205fb1850862e6244b16248a72abf	0	0	0	0	0	0	0	0	0	0	0	0	0	0	0	0	0	0	0	0	0	0	0	0	0	0	0	0	0	0	0	0	0	0	0	0	0	0	0	0	0	0	12	0	0	0	0	0	0
68750a6c3a5d43359548ca00ce1cde5b	0	0	35	26	0	248	0	52	139	0	0	0	0	0	0	0	0	0	0	27	0	24	0	0	224	70	155	0	0	0	41	57	0	0	0	35	819	0	32	67	0	0	0	0	0	77	0	0	0
6c0a89fcba0006203a951aac22312a4c	0	0	0	0	0	0	0	0	0	0	0	0	0	0	0	0	0	0	0	90	0	0	0	111	0	0	0	0	0	0	78	0	0	0	0	0	0	0	0	0	0	0	0	0	0	0	0	0	0
6ffdd8902eebca4b68be655e8bfa7cb1	0	0	0	0	0	0	0	0	0	0	0	0	0	0	0	0	0	0	0	0	0	0	0	0	0	0	0	0	0	0	0	0	0	0	0	0	0	0	0	0	91	0	0	0	0	0	0	0	0
fb2b0c63bc63185979fba74d0ab4c2fa	0	0	0	0	0	0	923	0	0	0	0	0	0	0	0	0	0	0	0	0	0	0	249	0	0	0	0	0	0	0	0	0	0	0	0	23	0	0	0	0	0	0	0	0	0	0	0	0	0
3264a349fb62e3db396681399d9e29db	0	0	0	0	0	0	0	0	0	0	0	0	0	0	0	0	0	0	0	0	0	0	0	14	0	0	0	0	0	0	0	0	0	0	0	0	0	0	0	0	0	0	0	0	0	0	0	0	0
a62ab1feed1bdc3539daf6d71dd1aeae	0	0	0	0	0	0	0	0	0	0	0	0	0	0	0	0	0	0	0	0	0	0	0	0	0	0	11	0	0	0	0	0	0	0	0	0	0	0	0	0	0	0	0	0	0	0	0	0	0
6a75830edac1e48a7cf3939caa6a3f0e	0	0	0	0	0	0	0	0	0	0	0	0	0	0	0	0	0	0	0	0	0	0	0	0	0	0	0	0	0	0	0	0	0	0	0	0	0	0	0	0	0	0	0	0	0	0	0	0	0
13f529dc8c07b4734680b94f3433e1e8	0	0	0	0	0	0	0	0	0	0	0	0	0	0	0	0	0	0	0	0	0	0	0	0	0	0	0	0	0	0	0	0	0	0	0	0	0	0	0	2135	0	0	0	0	0	0	0	0	0
245d258f97b3196d0c17982dc1e3ff56	0	163	36	0	192	25	0	210	45	0	0	0	0	0	0	0	0	0	0	107	0	0	0	80	0	0	95	43	0	0	0	0	311	30	0	0	149	0	12	54	0	0	0	118	0	55	0	0	0
8f6bd73ff858f125f501dc14911fd444	0	0	0	0	0	0	0	0	0	0	0	0	0	0	0	0	0	0	0	0	0	0	0	0	0	0	0	0	0	0	0	0	23	0	0	0	0	0	0	0	0	0	0	0	0	0	0	0	0
0e4f0d326c33d7641dd4f43046d91444	0	0	0	0	0	0	0	0	0	0	0	0	0	0	0	0	0	0	0	0	0	0	0	0	0	0	0	0	0	0	0	0	0	0	0	0	0	0	0	0	0	0	0	28	0	0	0	0	0
9bd2c3b19b66bef992ee02c65834dff5	0	0	0	0	0	0	0	0	0	0	0	0	0	0	0	0	0	0	0	0	0	0	0	0	0	0	0	0	0	0	0	0	0	0	0	0	0	0	0	0	0	0	0	0	0	0	0	0	0
164681f39f8a2436f84f7b283331964b	0	151	163	0	218	0	0	58	0	0	0	0	0	0	0	0	72	0	0	0	0	0	0	0	0	0	147	0	0	0	32	0	339	73	0	0	0	0	0	22	0	0	0	3108	0	0	0	0	0
62e55e746fe30b1941df35e2ae69ef7a	0	0	0	0	119	0	0	0	0	0	0	142	0	0	0	0	0	0	0	0	0	0	0	0	0	0	221	0	0	0	0	0	792	0	0	0	0	0	0	0	0	0	0	0	0	0	0	0	0
e56a2ace78e8eb86a4c7733d8e22cb8d	78	705	208	2561	858	209	508	386	14	234	213	51	173	289	146	68	45	377	363	0	0	2593	1812	0	409	182	2809	20	488	1068	1054	406	18	209	533	299	4170	246	518	2858	203	1048	64	40	716	542	30	368	334
ba65d8f34c9fa8ef55ab5aa008f5e4d8	0	0	0	0	0	0	0	0	0	0	0	0	0	0	0	0	0	0	0	0	0	0	0	0	0	0	0	0	0	0	0	0	0	0	0	0	0	0	0	0	0	0	0	0	0	0	0	0	0
8f956aa98a35cbaaf45cc4379971536f	0	28	0	0	31	0	0	0	0	0	0	0	37	0	0	0	0	0	0	0	0	0	0	0	0	0	0	0	0	0	0	0	0	37	0	0	0	0	0	0	0	0	0	0	0	0	24	0	0
a49a6912d4a0ef9b8de93b58857c2a93	0	0	0	0	0	18	0	0	0	0	0	0	0	0	0	0	0	0	0	0	0	0	0	0	0	0	0	0	0	0	0	0	0	0	0	0	0	0	0	0	0	0	0	0	0	0	0	0	0
6a6b26b6a816b6968432c3f4f1789f83	0	0	0	0	0	0	0	0	0	56	0	0	0	0	0	0	0	0	0	0	0	0	32	0	0	0	0	0	55	0	0	0	0	0	89	0	0	0	0	0	0	0	0	0	0	0	0	0	0
275afeb96749f0c8b0f321a43be53d90	0	0	0	0	0	0	0	22	0	0	0	0	0	0	0	0	0	0	0	0	0	0	0	0	0	0	0	0	0	0	0	0	0	0	0	0	0	0	0	0	0	0	0	0	0	0	0	0	0
6a7b7a70402233d87206b8874e8e3058	0	0	0	0	0	0	0	0	0	0	0	0	0	0	0	0	0	0	0	0	0	0	0	0	0	0	0	0	0	0	0	0	0	0	0	18	0	0	0	0	0	0	0	0	0	0	0	0	0
ce99ff691dc405ec2cb541095c51bd01	0	0	0	0	0	0	0	0	0	0	0	0	0	0	0	0	0	0	0	0	0	0	0	0	0	0	0	0	0	0	0	0	0	0	0	0	0	0	0	0	0	0	0	0	0	0	0	0	0
c1f7dd47aabc1e074f0d93685f95d75c	0	0	0	0	0	0	0	0	0	0	0	0	0	0	0	0	0	0	0	0	0	0	0	0	0	0	0	0	0	0	0	0	0	0	0	0	0	0	0	0	40	0	0	0	0	0	0	0	0
32753d514c87742b91ebe72a0160b7bf	0	0	0	0	0	0	0	0	0	0	0	0	0	0	0	0	0	0	0	0	0	0	0	0	0	0	0	0	0	0	0	0	0	0	0	0	6	0	0	0	0	0	0	0	0	13	0	0	0
0612707f5ac9a2c72d4a5b374bcb154a	0	31	0	0	38	0	0	0	0	0	0	0	0	0	0	0	0	0	0	0	0	0	0	0	0	0	0	0	0	0	0	0	0	0	0	0	0	0	0	0	0	0	0	0	0	0	0	0	0
e4e07366e7deecbe0fb7e2fb642302ee	0	0	18	0	0	0	0	0	0	0	0	0	0	0	0	0	0	0	0	0	0	0	0	0	0	0	0	0	0	0	0	0	0	0	0	0	0	0	0	0	0	0	0	0	0	0	0	0	0
e10ee36c186ddfd40ce871c27399e739	0	0	0	0	0	0	0	53	0	0	0	23	0	0	0	0	0	0	0	0	0	0	20	0	0	0	0	0	0	0	0	0	0	0	0	0	0	0	0	0	0	0	0	0	0	0	0	0	0
6f62800c23cc911c35c6120e8a424502	0	0	0	0	0	23	0	1	0	0	0	0	0	0	0	0	0	0	0	0	0	0	0	0	0	0	0	0	0	0	0	0	0	5	0	0	0	24	0	0	22	0	0	0	0	0	0	0	0
02c56904b8658ca822c7dcfd8a3fee09	0	0	0	0	0	0	0	0	255	0	0	0	0	0	0	0	0	0	0	0	0	0	0	0	0	0	0	0	0	0	0	0	0	0	0	0	0	0	0	0	0	0	0	0	0	0	0	0	0
bb6186d33e911b80534489fe69a0a93b	18	0	90	190	0	0	30	0	0	55	52	33	38	0	127	95	0	0	65	86	0	113	0	215	87	0	284	72	190	40	80	0	0	80	119	32	0	140	105	308	82	225	0	110	142	0	190	0	52
4bda9a2bd137ce7aae1574a0963d036b	0	0	0	0	0	0	347	0	0	0	0	0	0	0	0	28	0	0	0	0	0	0	0	0	0	0	0	0	0	0	0	0	0	0	0	319	0	0	0	0	0	0	0	0	0	0	0	0	0
bc02916655c22b7539963f44a7da3585	0	0	0	0	0	11	0	0	0	0	0	13	0	0	0	0	0	0	0	0	0	0	0	0	0	0	0	0	0	0	0	0	0	0	0	0	0	0	0	0	0	0	0	0	0	0	0	0	0
d1737201d71f00fe1a06b4c6b8a9c0e1	0	0	0	0	0	0	0	0	0	0	0	41	0	0	0	0	0	0	0	0	0	0	0	0	0	0	0	0	0	0	0	0	0	0	0	0	0	0	0	0	0	0	0	0	0	0	0	0	0
40f6117e7cf1dddda2382b79f2c4527f	0	0	0	0	0	0	0	0	0	0	0	0	0	0	0	0	0	0	0	0	0	0	0	0	0	0	0	29	0	0	0	0	0	0	0	0	0	0	0	0	0	0	0	0	0	0	0	0	0
b99908a7031c2641d8abee2385607c41	0	0	0	0	0	0	0	0	0	0	0	0	0	0	0	0	0	0	0	0	0	0	0	0	0	0	0	0	0	0	0	0	0	0	0	0	0	0	0	0	0	0	0	0	0	0	0	0	0
aebe5ed54217930538c06790d7d0234d	67	186	164	100	162	408	0	170	741	0	171	0	93	515	517	534	0	367	193	45	0	28	108	157	905	439	237	68	131	74	301	88	0	397	96	60	1104	214	146	535	239	194	375	601	154	525	775	212	654
36ea902d639764a3f0ee24f8d3055135	0	6	56	0	12	7	0	119	0	0	0	0	68	10	434	0	333	0	0	46	0	0	0	40	0	0	27	262	0	0	9	0	10	137	0	0	32	34	0	33	20	0	0	165	7	0	14	0	445
baf5728ef316a8cef511632b30fc9a3b	0	0	0	0	0	0	0	39	0	0	0	0	0	0	0	0	0	0	0	0	0	0	0	0	0	0	0	0	0	0	0	0	603	0	0	0	0	0	0	0	0	0	0	0	0	0	0	0	0
45cfcf37dca216ff234696ce5e84e41a	0	0	0	0	0	0	0	0	0	0	32	0	0	0	0	0	0	0	0	0	0	0	0	0	0	0	0	0	0	159	0	0	0	0	0	0	0	0	9	0	0	35	0	0	55	0	0	0	0
afe89a150c090fa2a54ba5ec65b565c1	0	51	0	0	98	0	0	73	0	0	10	0	13	0	9	0	30	0	0	0	0	0	47	0	0	0	0	0	0	35	0	0	0	0	17	0	0	0	0	0	0	0	0	0	0	0	0	0	0
4ce5006f64bdda6ad3f0590a6eea7857	0	0	0	0	0	0	0	0	0	0	0	0	0	0	0	0	0	0	0	0	0	0	0	0	0	0	0	0	0	0	0	0	0	0	0	0	0	0	0	0	0	0	0	0	0	0	0	0	0
824b9c5e131ccef5ab3286cfde31640c	0	0	47	56	0	0	0	0	0	0	0	0	36	42	0	11	54	0	0	14	30	45	0	0	0	0	0	70	0	46	0	9	0	0	0	0	0	38	47	0	0	9	0	64	0	0	18	44	0
7bef84be065602ccf20fa01a212c9a2e	0	0	0	0	0	0	0	0	0	0	0	0	0	0	0	0	0	0	0	0	0	0	0	0	0	0	0	0	0	0	0	0	0	0	0	0	0	0	0	0	0	0	0	0	0	0	0	0	0
5eece89d9f6874e3223ac48b96e68c8c	0	0	0	0	0	0	0	0	0	0	0	0	0	0	0	0	0	0	0	0	0	0	0	0	0	0	0	0	0	0	0	0	0	0	0	0	0	0	0	0	0	0	0	0	0	0	0	0	43
23f63f6ca562db668d4f190f3d27bb49	0	0	0	0	0	34	0	0	0	0	0	0	38	0	0	0	0	0	0	0	0	0	0	0	0	0	0	37	0	0	0	0	0	0	0	0	0	0	0	0	0	0	0	0	0	0	51	0	0
d7c175c5b206160e3c14ffd3ae2019d7	0	0	0	0	0	0	0	0	0	0	0	0	0	0	0	0	0	0	0	0	0	0	0	0	35	0	0	0	0	0	0	0	0	0	30	0	0	0	0	0	0	0	0	0	0	0	0	0	0
28b8976e2709067d45033cb9df736705	27	12	0	0	8	8	0	7	45	0	0	0	13	0	41	0	0	0	0	32	0	0	55	0	51	0	0	0	0	0	0	34	17	9	0	0	117	24	0	49	24	0	17	0	0	17	19	0	0
dace49ff13c2896c5ff3706f86677b07	0	0	0	0	0	0	0	0	0	0	0	0	0	0	0	0	0	0	0	631	0	0	1531	187	0	0	0	0	0	0	0	0	13	0	0	0	0	0	13	0	0	0	0	0	0	0	0	0	0
e5d33fd2c28f16a09b9e815c5e42c787	0	24	0	0	27	0	0	0	0	0	0	0	0	0	0	0	0	0	0	0	0	0	0	0	0	0	0	0	0	0	0	0	0	0	0	0	0	17	0	0	0	0	0	0	0	0	0	0	0
4ad2a5bd7db17cfc0b8cfbd0a734d38d	0	0	0	0	0	0	0	0	0	0	0	0	0	0	0	0	0	0	0	0	0	0	0	0	0	0	0	0	0	0	0	0	0	84	0	0	0	0	0	0	0	0	0	0	0	0	0	0	0
4c1ceb7de39752b23954152c834fbcf2	0	6	20	0	0	0	0	0	0	0	0	41	0	0	0	0	0	0	0	7	10	0	0	16	19	0	0	0	0	0	0	0	0	0	0	0	20	0	0	0	0	0	0	0	0	25	0	0	0
5b919b3b01cd0ba1c7f7312167c0551d	22	0	44	0	0	0	0	0	0	0	0	0	0	0	0	0	0	0	0	0	0	0	0	0	33	0	0	0	0	0	0	0	0	0	0	0	0	0	0	0	0	0	0	0	0	0	0	0	0
5630abcf2a0751973b520c34da2efded	0	0	0	0	0	0	0	0	0	0	0	0	0	0	0	0	0	0	0	0	0	0	0	0	0	0	0	0	0	0	0	0	0	0	0	0	0	0	0	0	0	0	0	0	0	0	0	0	0
b0a5f2791a36ee994c0169a17844ace8	0	0	0	0	0	0	0	0	0	0	0	0	0	0	0	0	0	0	0	0	0	0	0	0	0	0	0	0	0	0	0	0	0	0	0	0	0	0	0	0	0	0	30	0	0	0	0	0	0
1c3e0a878dee036f83de60787d610346	0	0	0	0	0	0	0	0	0	0	0	0	0	285	0	0	38	0	0	0	0	0	0	0	0	441	0	0	0	0	0	0	0	0	0	0	0	0	0	0	0	0	0	0	0	0	0	0	40
b03fdbe14de77c74646801adc3c6a25f	0	0	0	0	0	0	0	55	0	0	0	0	69	0	0	0	0	0	34	0	0	0	0	22	0	0	0	0	0	0	0	32	0	0	0	0	0	0	0	105	0	0	0	46	0	23	0	22	0
d8fff9165d18d202b189c310602e2fa3	0	0	0	0	0	0	0	0	0	0	0	0	0	0	0	0	0	0	0	0	0	0	0	0	10	0	0	0	0	0	0	0	0	0	0	0	0	0	0	0	0	0	0	0	0	0	0	0	0
20da7c552e56c8ebaea0f297a52a79a6	0	0	0	0	0	0	0	0	0	0	0	0	0	0	0	29	0	0	0	0	0	0	0	0	0	0	0	0	0	0	0	0	0	0	0	0	0	0	0	0	0	0	0	0	0	0	0	0	0
72f3693dc6c15cb5d5cdb721cc6cd1a4	0	0	0	0	0	0	0	0	0	0	0	0	0	0	0	0	0	0	0	0	0	0	0	0	0	0	0	0	0	0	0	0	0	0	0	0	0	0	0	0	0	0	0	38	0	0	0	0	0
ff37fcc9d769066a56e4afbc61516b3f	18	325	434	78	399	292	14	370	436	165	133	52	240	304	407	226	116	135	384	313	149	21	140	77	240	149	223	89	337	93	279	72	43	292	375	121	1260	177	450	703	155	105	258	375	95	1008	315	117	106
d3899a3efa7c0a4660c1f2cc40cd0b75	0	26	74	0	17	0	0	219	0	0	0	23	8	0	0	0	24	0	0	0	0	0	0	30	0	0	86	210	0	0	11	0	26	151	0	0	0	0	0	0	41	0	0	136	0	0	0	0	0
00d77ed42c0f0d1cbad479de2818e2fc	0	0	0	55	0	0	0	122	0	49	0	210	40	82	0	38	165	48	17	29	0	63	164	59	107	119	99	0	138	0	0	39	0	26	116	20	167	0	129	51	0	41	0	0	60	90	0	0	0
431b5d36b9216fb214648f7622314e98	0	0	0	0	0	0	0	0	0	0	0	0	0	0	0	0	0	0	0	0	0	0	0	0	0	0	0	0	0	0	0	0	0	0	0	0	50	0	0	0	0	0	0	0	0	0	0	0	0
811b066a39289ea5df49ab9392feb072	0	0	0	0	0	0	0	0	0	0	0	0	0	0	0	0	0	0	0	0	0	0	0	0	0	0	0	0	0	0	0	0	177	0	0	0	0	0	0	0	0	0	0	0	0	0	0	0	0
aee2dd7df702e1cd6fbf8fd3b5ac9474	0	0	0	0	52	0	0	0	0	0	0	0	0	0	0	0	0	0	0	0	0	0	0	0	0	0	0	0	0	0	0	0	0	0	0	0	0	0	0	0	0	0	0	0	0	0	0	0	0
5c3143980c4b75f057fdbd1afc720e1d	0	0	0	0	0	0	0	0	0	0	0	0	0	18	0	0	0	0	0	0	0	0	0	0	0	0	0	0	0	0	0	0	0	0	0	0	0	0	0	0	0	0	0	0	0	0	0	0	0
cc87b760e1fcdbf2cc0ca3f69a7efbcf	0	61	27	0	69	7	0	724	0	0	0	261	35	0	0	0	155	0	0	0	0	0	391	0	54	0	0	13	0	0	0	0	7	0	0	0	0	8	0	0	0	0	0	0	0	58	0	0	0
da7c30850135927189f8b3c683780acf	0	0	0	0	0	0	0	0	0	0	0	0	0	0	0	0	0	0	0	0	20	0	0	0	0	0	0	0	0	0	0	0	0	0	0	0	0	0	0	0	0	0	0	0	0	0	0	0	0
98f0b37792bc3bbdeff0c56f5c7a6339	0	0	0	0	0	0	0	0	0	0	0	0	0	0	0	0	0	0	0	0	0	0	0	0	0	0	0	0	0	0	0	0	0	0	0	0	0	0	0	0	0	0	0	0	0	0	0	0	0
8b5d982952d55f04bb1320173e40ecb1	0	0	0	0	0	0	0	0	0	0	0	0	0	0	0	0	0	0	980	0	0	0	0	1068	0	0	0	0	0	0	0	0	0	0	0	0	0	0	0	0	0	0	0	0	0	0	0	0	0
be512fb3ec58a6f3abd7790bb1f74600	0	0	0	0	0	0	0	0	0	0	0	0	0	0	0	0	0	0	0	0	0	0	0	0	0	0	0	0	0	0	0	0	2068	0	0	0	0	0	0	0	0	0	0	0	0	0	0	0	0
6b093017ac60b629dd53f42b752ecdec	0	0	0	0	0	0	0	0	0	0	0	0	0	0	0	0	0	0	0	0	0	0	0	0	0	0	0	0	0	0	0	0	0	0	0	0	32	0	0	0	0	0	0	0	0	0	0	0	0
a95b72a10d533423b5e9d85d5ef4d314	0	0	0	0	0	0	0	0	0	0	0	0	0	0	0	0	0	0	0	0	0	0	0	0	68	0	0	0	0	0	0	0	0	0	0	0	0	0	0	0	0	0	0	0	0	0	0	0	0
e68b489d95c9a8878685e1c13b21f356	0	0	0	0	0	0	0	0	0	0	0	0	0	0	0	0	0	0	0	0	0	0	0	0	0	0	0	0	0	0	12	0	0	0	0	0	0	0	0	0	0	0	0	0	0	0	0	0	0
f1c09be29d4b52ab70da47a3db8f033c	0	0	0	0	0	0	0	0	0	0	0	0	0	0	0	0	0	0	0	0	0	0	0	0	0	0	0	0	0	0	0	0	0	0	0	0	0	0	0	0	0	0	0	0	0	0	0	0	0
351307ec1323017d838cc8942d448084	0	0	27	0	0	0	0	0	0	0	0	0	0	0	0	0	0	0	0	0	0	0	0	0	0	0	0	0	0	0	0	0	0	0	0	0	0	0	0	0	0	0	0	0	0	0	0	0	0
5047653afe3981b5ff78a0a5c1e38095	0	0	0	0	0	0	0	0	0	0	0	0	0	0	0	0	0	0	0	0	0	0	0	0	0	0	0	0	0	0	0	0	20	0	0	0	0	0	0	0	0	0	0	0	0	0	0	0	0
dbcdaca3ee9e9fe75d8829e87b8551dc	148	0	179	57	0	173	121	0	150	121	73	0	95	166	241	216	130	192	169	182	168	100	0	129	0	143	0	260	0	76	0	103	0	253	0	86	0	151	205	0	220	173	0	106	170	0	177	113	123
471b65a271a7606788a11a24b5bc4596	0	0	0	0	0	0	0	0	0	0	0	0	0	0	0	0	0	0	0	0	0	0	0	0	0	0	0	0	0	0	0	0	0	0	0	0	36	0	0	0	0	0	0	0	0	547	0	0	0
e9af133676d5106ef76029320b6b8a7c	0	350	0	0	390	0	218	741	0	0	0	0	0	0	0	0	0	0	0	0	0	0	97	0	0	0	0	0	0	0	0	0	0	0	0	99	0	0	0	0	0	194	0	0	174	0	39	0	17
ba3e1156a1b37e7279e1a091a000ee30	0	0	0	215	0	0	0	0	0	0	0	0	0	0	0	0	0	0	0	0	0	0	0	0	0	0	0	0	0	0	0	0	0	0	0	0	0	0	0	0	0	0	0	0	0	0	0	0	0
4347c81f18278c95b2e34ab8a6bf7b6c	0	0	0	0	0	0	0	0	0	0	0	0	0	0	0	0	0	0	0	0	0	0	0	0	0	0	0	0	0	0	0	0	0	0	0	0	0	0	0	0	0	0	0	0	0	18	0	0	0
0ca0b81fac6a5e779fdf2ffaa7bfe5c9	0	0	0	0	0	0	0	0	0	0	0	0	0	0	0	0	0	0	0	234	0	0	0	0	0	0	0	0	0	0	0	0	0	0	0	0	0	0	0	0	0	0	0	0	0	0	0	0	0
fc85598bd0c63573faa31897b47626ec	167	0	0	0	51	0	51	7	162	0	0	37	264	0	0	0	0	0	50	69	0	0	0	0	28	0	44	9	0	0	0	0	152	0	0	0	113	0	0	526	0	0	0	120	0	0	48	0	0
32db3070ed49f94b8f1e670388d037ab	0	0	0	0	0	0	0	0	0	0	0	0	0	0	0	0	0	0	0	0	0	0	0	0	0	0	0	0	0	0	0	0	0	0	0	0	98	0	0	0	0	0	0	0	0	0	0	0	0
3a7c92fea39cb3186099270a4aad50c0	0	0	0	0	0	0	0	0	0	0	0	0	0	0	0	0	0	0	0	0	0	0	0	0	0	0	0	0	0	0	0	0	17	0	0	0	0	0	0	0	0	0	0	0	0	0	0	0	0
514429bb77ffc05eb4f3172c29fd03bc	0	0	0	0	0	0	0	0	0	0	0	0	0	0	25	0	0	0	0	0	0	0	0	0	0	0	0	0	0	0	0	0	0	0	0	0	0	0	0	0	0	0	0	0	0	0	0	0	0
e1d36c21f25414a31381bec99a2979e2	0	0	24	0	0	0	0	0	0	152	83	39	30	59	0	0	0	0	0	0	0	0	74	119	0	42	0	0	297	52	0	0	0	0	267	0	0	28	0	0	0	113	0	0	49	96	0	139	0
b8cd3b50831feb934075c533543e052e	0	0	0	0	0	0	0	0	0	0	0	0	0	0	0	25	0	0	0	0	0	0	0	0	0	0	0	0	0	0	0	0	0	0	0	0	0	0	0	0	0	0	0	0	0	0	0	0	0
7ca08a360c86fb4a956518f92f2a278f	0	0	0	0	0	0	0	0	0	0	0	0	0	0	0	0	0	0	0	0	0	0	0	0	0	0	91	0	0	0	0	0	0	0	0	0	0	0	0	0	0	0	0	0	0	0	0	0	0
6472eb8b1e09f892aca2f23182962903	0	0	0	0	15	0	0	0	0	0	0	54	0	0	0	197	0	0	0	0	0	0	0	0	13	0	0	0	40	0	0	6	19	0	0	0	22	11	0	9	0	0	159	0	0	0	0	0	0
411fe40d4f7b392d892b93a612a008d9	0	0	0	0	0	0	0	0	0	0	0	0	0	0	0	0	0	0	0	0	0	0	0	0	0	0	0	0	0	0	0	0	13	0	0	0	0	0	0	0	0	0	0	0	0	0	0	0	0
4d832c278de83d5d83a29f043edd8ced	0	0	11	15	0	0	0	0	0	0	70	0	0	0	0	0	0	0	24	10	0	21	36	0	13	0	0	0	23	38	0	0	20	0	36	0	92	0	0	0	0	10	0	0	0	38	0	0	0
b2b77531b1cc80472c230b7773d49386	0	21	188	0	41	0	0	58	103	0	0	112	16	0	0	0	0	0	0	0	0	0	0	0	0	0	82	0	0	0	59	0	2574	108	0	0	0	530	0	205	695	0	0	43	0	128	47	0	0
1f99be051d5f61d5cdcbf0dcf4d0cfdf	0	0	0	0	0	0	0	0	0	0	0	0	0	0	0	0	0	0	0	0	0	0	0	0	0	0	0	0	0	0	10	0	0	0	0	0	0	0	0	0	0	0	0	0	0	0	0	0	0
33e375734de140165add04e8be640b8a	0	0	0	0	0	0	0	0	0	0	0	0	0	0	0	0	0	0	0	0	0	0	0	0	0	0	656	0	0	0	0	0	0	0	0	0	0	0	0	0	0	0	0	0	0	0	0	0	0
00db3c57e51808ecfb5d04e07e03eac8	0	0	0	0	0	0	0	0	0	0	0	0	0	0	0	0	0	0	0	0	0	0	0	0	0	0	0	20	0	0	0	0	0	0	0	0	0	0	0	0	0	0	0	0	0	0	0	0	0
14cf2d7273c447dd4b965bb9866401fc	0	93	36	73	73	0	0	39	55	0	0	41	0	36	37	0	58	124	78	228	68	83	60	0	56	48	47	0	95	232	49	0	17	50	40	107	214	40	0	133	63	64	191	0	73	251	158	27	25
fe5d4aea12a915ce7fd8348da3b2328f	0	0	0	0	0	0	0	0	0	0	0	0	0	0	0	0	0	0	0	0	0	0	0	0	0	0	0	0	0	0	103	0	0	0	0	0	0	0	0	0	0	0	0	0	0	0	0	0	0
42e32870773de75fe24ed138d2a0d352	0	10	0	0	0	0	0	0	0	0	0	0	0	0	0	0	0	0	0	0	0	0	0	0	0	0	0	0	0	0	0	0	73	0	0	0	0	0	0	15	0	0	0	0	0	0	0	0	0
5e5ba5b09a5a7dca74a6ea9395d0a3ea	0	0	0	0	0	0	0	0	0	0	0	0	0	0	0	0	0	0	0	0	0	0	0	84	0	0	0	0	0	0	0	0	0	0	0	0	0	0	0	0	0	0	0	0	0	0	0	0	0
d838c001aa609810858be27419d428fc	0	0	0	0	0	0	0	0	0	0	0	0	0	0	0	0	0	0	0	0	0	0	0	0	0	0	0	0	0	0	0	0	0	0	0	0	0	0	0	0	0	0	0	0	0	0	0	0	0
45c447feb9b9475bcb1587c92fef77ce	0	0	0	0	0	0	0	0	0	0	0	0	0	0	0	0	0	0	0	0	0	0	0	0	0	0	0	0	0	0	0	0	0	0	0	0	0	0	0	0	0	0	0	0	0	0	0	0	0
18c0145c7327a07314c9d147ba386839	0	0	0	0	0	0	0	0	0	0	0	0	16	0	0	0	0	0	0	0	0	0	0	0	0	0	0	0	0	0	0	0	0	0	0	0	0	0	0	0	0	0	0	0	0	0	0	0	0
bc76dbe90933776407dd3c680d1d63a7	175	174	172	350	231	461	0	257	51	692	255	30	441	429	198	119	97	1434	263	1081	424	294	362	23	298	387	691	1530	963	154	496	886	249	12	992	160	802	322	63	1102	243	1158	125	771	773	378	215	84	95
7a341712a900ec8f74eaeee3bebc8828	0	0	353	0	0	0	0	0	0	0	0	0	674	0	232	40	0	0	0	0	0	0	0	0	0	0	0	0	0	0	0	0	0	47	0	0	46	71	0	0	88	0	0	0	0	0	94	0	0
f8d5b87a8bd9a595ed7c75bac940c310	0	0	0	0	0	0	0	0	0	0	0	0	0	0	0	0	0	0	0	0	0	0	0	0	0	0	0	0	0	0	0	0	0	0	0	0	0	0	0	0	0	0	0	0	0	0	0	0	0
7ab98fc671d5e3d52e3953c8d8ba0f36	0	0	0	0	0	0	0	0	0	0	0	0	0	0	0	0	0	0	0	0	0	0	0	0	0	0	0	0	0	0	0	0	0	0	0	0	0	0	0	0	0	0	22	0	0	0	0	0	0
c4dfbf7ae8e622c23d88d0a03337f808	0	0	0	0	0	0	0	0	0	0	0	0	0	0	0	0	0	0	20	0	0	0	0	0	0	0	0	0	0	0	0	0	0	0	0	0	0	0	0	0	0	0	0	0	0	0	0	0	0
2ae2b78cc500263069b1274524609cfd	0	0	0	0	0	0	0	0	0	0	0	0	0	0	0	0	0	0	0	0	0	0	0	0	0	0	0	0	0	0	0	0	0	0	0	0	10	0	0	0	0	0	0	0	0	0	0	0	0
77877c792f27af8ba03561c335b95241	0	0	0	0	0	0	0	0	0	0	0	0	0	0	0	0	0	0	0	0	0	0	0	0	29	0	0	0	0	0	0	0	0	0	0	0	0	0	0	0	0	0	0	0	0	0	0	0	0
235a3631d1cc01de1de9aa6fc9025300	235	16	198	500	44	631	0	141	445	19	242	135	170	110	358	579	77	180	515	145	89	343	37	62	175	80	61	116	60	283	67	603	69	206	66	220	669	213	136	587	237	399	75	193	199	392	166	529	292
cb1e7aaa67a4f40977f43c0a6b3a22bd	228	0	144	0	0	39	29	0	0	0	48	0	0	0	0	0	0	0	145	0	0	0	0	0	0	0	0	0	0	0	0	0	30	0	0	116	0	122	0	498	165	100	0	0	46	0	0	0	0
545e0b601f9bde0d1216ccedf6034a8c	0	0	0	0	0	0	0	0	0	0	0	0	0	254	0	0	68	0	0	0	242	0	188	235	0	355	0	0	0	0	0	0	0	218	0	0	128	0	0	0	0	421	0	0	242	0	0	0	0
04899028feb79e3cc1616d4ea88bfb75	0	0	0	0	0	0	0	0	0	0	0	0	0	0	0	0	0	0	11	0	0	0	0	0	0	0	0	0	0	0	0	0	0	0	0	0	0	0	0	0	0	0	0	0	0	0	0	0	0
931d21b654360f3623c63991138e1cd2	0	7237	252	0	8537	263	0	105	0	0	0	664	308	0	187	0	176	311	727	357	267	0	0	0	166	0	170	0	193	0	0	0	289	1978	173	164	331	582	0	3699	503	302	261	638	275	424	596	379	335
affc639c07b9dc0c7e668683a78689f4	0	0	0	51	0	0	54	63	0	0	0	0	0	0	0	0	0	32	75	0	0	69	0	0	0	0	0	0	0	409	0	73	0	0	0	0	0	211	0	0	218	0	0	0	0	65	0	0	0
dc49d1720e5d6921456b6337b5c39759	0	0	0	0	0	0	0	0	0	0	0	0	0	0	0	0	0	0	0	0	0	0	0	0	0	114	0	0	0	0	0	0	0	0	0	0	0	0	0	0	0	0	0	0	0	0	0	0	0
ebd037a806e8be79aa47a2dda1d68789	0	0	0	0	0	0	0	21	0	0	0	0	0	0	0	0	0	0	0	0	0	0	0	0	0	0	0	0	0	0	0	0	0	0	0	0	0	0	0	0	0	0	0	0	0	0	0	0	0
2e58cdfe0a9346f323fd1359a75794fb	0	0	0	0	0	0	0	0	0	0	0	0	0	0	0	0	0	0	0	0	0	0	0	0	0	0	0	0	0	0	0	0	0	0	0	0	0	0	0	0	0	0	0	0	0	0	0	0	0
6176ce7d96a7f55b2c192cf9f084c5ac	58	0	1526	0	0	0	0	0	0	0	0	0	0	0	57	0	23	0	266	223	0	0	0	83	233	0	38	159	0	0	30	28	0	459	0	0	0	186	0	210	223	477	0	23	198	25	396	0	78
c3278667190a4db81575959db58297a1	0	83	0	62	87	61	164	0	16	0	93	49	113	0	43	0	0	45	0	0	171	58	0	0	63	0	0	508	183	98	0	33	131	67	31	54	149	479	0	142	429	52	0	0	36	0	45	0	0
71d6dc4a5c8acf5eb8325979699c3419	0	0	0	0	0	0	0	0	0	0	0	0	0	0	0	0	0	0	0	0	0	0	0	0	0	0	0	11	0	0	0	0	0	0	0	0	0	0	8	0	0	0	0	0	0	0	0	0	0
efec8987ef5cbcf6a6499800c9b57558	0	0	0	0	0	0	0	0	0	0	0	25	0	0	0	0	253	0	0	0	0	0	233	0	0	0	0	0	0	0	0	0	0	0	0	0	0	0	0	0	0	0	0	0	0	0	82	0	0
2484f05a68e8d8c4d3d4729af98c3cee	0	0	0	0	0	0	0	0	0	0	32	0	0	0	0	0	0	0	0	0	0	0	0	0	0	0	0	0	0	0	0	0	0	0	0	0	0	0	0	0	0	0	0	0	0	0	0	0	0
078444420d1f408011abdb61ad97efff	0	0	0	0	0	0	0	0	0	0	0	0	0	0	0	0	0	0	0	0	0	0	0	0	0	0	0	0	0	0	0	0	0	0	0	0	0	0	0	0	0	0	14	0	0	0	0	0	0
1c63f7247661861cd8f7a3b1e3ac74b2	0	0	0	0	0	0	0	0	0	0	0	0	0	0	0	0	0	0	0	0	0	0	0	0	0	0	0	0	0	0	0	0	250	0	0	0	0	0	0	0	0	0	0	0	0	0	0	0	0
70f8518ecc9753132115c953df8ba3ad	21	0	0	20	0	0	0	0	0	0	0	0	0	0	0	0	0	0	0	0	0	0	0	0	0	0	0	0	0	0	5	24	0	0	0	0	0	0	19	21	0	0	0	0	0	0	0	0	0
03c790ba4b6f8e9c340a0b3441396be8	0	0	0	0	0	0	0	0	0	0	0	0	0	0	0	0	0	0	31	0	0	0	0	0	0	0	0	0	0	0	0	0	0	0	0	0	33	0	0	0	0	0	0	0	0	0	0	0	0
faad4daddaf314d90f62ad94982ceb43	0	0	0	0	39	0	0	0	0	0	0	0	0	0	0	0	0	0	0	0	0	0	0	0	0	0	0	0	0	0	0	0	0	0	0	0	0	0	0	0	0	0	0	0	0	0	0	0	0
7bc8484c9818b2634ae6d104e3b24aaa	0	279	0	0	0	0	0	0	0	0	0	0	0	0	0	0	0	0	0	0	0	0	0	0	0	0	0	0	0	0	0	0	0	0	0	0	0	0	0	0	0	0	0	0	0	0	0	0	0
b02cbb23157dc339f1edabf2d7e14546	0	0	0	0	0	0	0	0	0	0	0	0	0	0	0	0	0	0	0	0	0	0	0	0	0	0	0	0	0	0	0	0	182	0	0	0	0	0	0	0	0	0	0	0	0	0	0	0	0
28f7337464f08116f724efa84529a9be	0	0	0	0	0	0	0	0	0	0	0	0	0	0	0	0	0	0	0	0	0	0	0	0	0	0	0	76	0	0	0	0	0	0	0	0	0	25	0	0	0	0	0	0	0	0	0	0	0
91633503630d126286dbe7ff8d23ac53	0	0	0	0	0	532	0	64	0	0	0	39	93	0	0	0	0	0	0	0	0	0	0	0	0	0	0	0	31	0	0	0	0	0	28	0	0	46	0	0	0	0	0	0	0	0	0	0	0
92b602fb3647020aed926dfd465d7428	0	0	0	0	0	0	0	0	0	0	0	0	0	0	0	0	0	0	0	0	0	0	137	0	0	0	0	0	0	0	0	0	0	0	0	0	0	0	0	0	0	0	0	0	0	0	0	0	0
3f3d9814cf7a7c34ea77263abfb772b2	0	0	0	0	0	0	0	0	0	0	0	0	0	0	0	0	0	0	0	0	0	0	0	0	0	0	0	0	0	0	0	0	0	0	0	0	0	0	0	0	0	0	0	0	0	0	0	0	0
bc5f1aaec208f90b298bc085d3b6ce6b	0	0	0	0	0	0	0	0	0	0	0	0	0	0	0	0	0	0	32	0	0	0	0	0	0	0	0	0	0	0	0	0	0	0	0	0	0	0	0	0	0	0	0	0	0	0	0	0	0
34bfe0226eb3afea22d2708aaa63cc58	0	0	0	0	0	0	0	144	0	36	0	0	0	86	0	16	132	0	0	0	0	0	0	18	0	80	0	0	116	0	0	0	0	0	99	0	0	0	0	74	0	0	0	136	0	0	0	0	0
5e135f1cc7f10cd230ac63a48cca97da	0	0	0	0	0	0	0	0	0	0	0	0	0	0	0	0	0	0	0	0	0	0	0	0	37	0	0	0	0	0	0	0	0	0	0	0	0	0	0	0	0	0	0	0	0	0	0	0	0
f9d00c552e4e462f5ce89e19a9795731	0	0	0	0	0	0	0	0	0	0	0	0	0	0	0	0	0	0	0	0	0	0	0	0	0	0	0	0	0	66	0	0	0	0	0	0	0	0	0	0	0	0	0	0	0	0	0	0	0
bf796e831fd2a6e31a32e070951433b2	0	0	0	0	0	0	0	0	0	0	0	0	0	0	0	128	0	0	0	0	0	0	0	0	0	0	0	0	0	0	0	0	0	0	0	0	0	0	0	0	0	0	0	0	0	0	0	0	0
04aee8c4ef1239bfa6ee89a749e9846a	0	0	0	0	0	0	0	0	0	0	0	19	0	0	0	0	0	0	0	0	0	0	0	0	0	0	23	0	0	0	33	0	0	0	0	0	0	0	0	0	0	0	0	0	0	0	0	0	0
e7480fc727e776dbc2f652daab1c55db	0	0	0	0	0	0	0	0	0	0	0	0	0	0	0	0	0	0	0	0	0	0	0	0	0	0	0	0	0	0	0	0	0	0	0	0	0	0	0	0	0	0	0	0	0	0	0	0	0
6116f624b381251a683c31b72278afd4	0	1812	8	139	2034	45	49	1096	0	142	40	279	11	0	7	126	210	40	41	8	62	80	218	138	164	0	511	0	260	105	840	94	15	0	289	28	330	0	41	236	0	120	19	19	84	191	6	119	0
a64ba4595c6a2b7da667a1ce57498b26	33518	29497	18775	14431	38023	19723	15536	24952	18024	14085	12212	10978	13767	11396	20540	21680	23253	46051	18740	27531	19485	11863	37256	24572	39991	15141	66043	14979	48874	11419	35714	11351	21100	32231	35609	9796	49659	17918	16148	43624	24153	29082	20659	41077	35783	44006	27350	19528	17258
6e8c30e2c48320aaf174781439eb0e0a	29	0	476	0	0	81	0	0	43	0	38	0	1448	0	455	0	1074	0	0	0	0	0	0	125	0	0	0	21925	0	43	0	0	66	37	0	0	178	588	0	29	942	0	0	253	0	0	50	0	114
621492842a9298d79db8d956f546cd46	0	0	0	0	0	0	0	0	0	0	0	0	0	0	0	0	11	0	0	0	0	0	0	0	0	0	0	0	0	6	0	0	0	0	0	0	0	0	0	0	0	0	0	7	0	0	0	0	0
09492d269bd47e050341f9638010f673	0	0	0	0	0	0	0	0	0	0	0	0	0	0	0	0	0	0	0	0	0	0	0	0	0	16	0	0	0	0	0	0	0	0	0	0	0	0	0	0	0	0	0	0	0	0	0	0	0
27f129d811abd76ff6c9e066c0c94f62	0	0	0	0	0	0	0	0	0	0	0	0	0	0	0	0	0	0	0	0	0	0	0	0	0	0	0	0	0	0	0	0	0	0	0	0	0	0	0	0	0	0	0	0	0	0	0	0	0
c06ccd1f7d57566ef669942328b1a946	0	0	0	0	0	0	0	0	0	0	0	0	0	0	0	0	0	0	0	0	0	0	0	0	0	0	0	0	0	0	0	0	0	0	0	0	0	0	0	0	0	0	7	0	0	0	0	0	0
0eb568327582905b7642bc5228b666a5	0	0	0	0	0	0	0	0	0	0	0	0	0	0	0	0	0	0	0	0	0	0	8	0	12	0	0	0	0	0	0	0	0	8	0	0	0	0	0	0	0	0	0	0	0	0	0	0	0
c3b8178b1657c48fefb78d921f344a4b	0	0	0	19	0	0	0	0	0	0	0	0	0	0	0	0	0	0	0	0	0	0	0	0	0	0	0	0	0	0	0	0	0	0	0	0	0	0	0	0	0	0	0	0	0	0	0	0	0
902ceb87878a578545199aa432c8d889	0	0	0	0	0	0	0	0	0	0	0	0	0	0	0	0	0	0	0	0	0	0	0	0	0	0	0	0	0	0	0	0	0	0	0	0	0	0	0	0	0	0	0	0	0	0	0	0	0
5622101f82f465a892b9f1588787da59	0	0	0	0	0	0	0	0	0	0	0	0	0	0	0	0	46	0	0	0	0	0	0	0	0	0	0	0	0	0	0	0	0	0	0	0	0	0	0	0	0	0	0	27	0	0	0	0	0
18b8208c04b295bf65863f0f922d8e37	0	328	68	85	360	86	23	368	0	267	0	0	0	0	0	0	0	23	52	0	103	69	206	595	171	0	10	0	672	204	0	51	0	116	312	12	401	25	630	25	13	0	0	0	0	30	0	133	28
d0a90b633602d88dabec00da472ff7cf	0	0	0	0	0	0	0	52	0	0	0	18	0	0	0	0	0	0	0	0	0	0	0	0	0	0	0	0	0	0	0	0	0	0	0	0	0	0	0	0	0	0	0	0	0	0	0	0	0
770ba5a2affb193619178adee7c5d49d	0	0	0	0	0	0	856	327	0	143	230	0	0	1028	0	67	569	436	14	0	0	0	0	0	517	823	0	0	542	125	0	0	34	0	280	17	0	0	20	0	0	0	0	0	0	702	0	88	0
dfb7d06fe88f834b48355a78450606be	0	16	0	0	20	0	0	0	5	0	0	0	0	0	0	0	8	0	0	0	0	0	0	0	0	0	43	0	0	0	0	0	40	0	0	0	0	0	0	11	0	0	0	0	0	0	0	0	0
5a8b6b2fe96dfb84ccf94292bfbfaca2	0	0	0	0	0	0	0	0	0	0	0	0	0	0	0	0	0	0	0	0	0	0	0	0	0	0	0	0	21	0	0	0	0	0	0	0	0	0	0	0	0	0	0	0	0	0	0	0	0
11dc7530d80e57b7b8b9d1ec9688d37a	0	0	0	0	0	0	0	0	0	0	0	0	0	0	0	29	0	0	0	0	0	0	0	0	0	0	0	0	0	0	0	0	0	0	0	0	0	0	0	0	0	0	0	0	0	0	0	0	0
56e788ad0a1698772a8366325204fc0b	0	0	0	0	0	0	0	0	0	0	0	0	0	0	0	0	0	0	11	0	0	0	0	0	0	0	0	0	0	0	0	0	0	0	0	0	0	0	0	0	0	0	0	0	0	0	0	0	0
9ea0534ab318845b5813feb9db345115	0	0	0	0	0	0	0	0	0	0	0	0	0	0	0	0	0	0	0	0	0	0	0	0	0	0	0	0	0	0	0	0	0	0	0	0	0	0	0	148	0	0	0	0	0	0	0	0	0
2770cab6b6b52bf6d6dca78dce4d38ed	0	0	0	0	0	0	0	0	0	0	0	0	0	0	0	0	0	0	0	0	0	0	0	0	0	0	0	0	0	0	0	0	0	0	0	0	0	0	0	0	0	0	27	0	0	0	0	0	0
c978e17a88a3f9323a87b7b92ca4eee1	0	0	0	0	0	0	0	0	0	0	0	0	0	0	0	0	0	0	0	0	0	0	0	0	0	0	0	0	0	0	0	0	0	0	0	0	0	0	0	0	0	0	0	0	0	0	0	0	0
76725a712df931849a570ddc4b88da18	0	0	0	0	0	0	0	0	0	0	0	0	0	0	0	0	0	0	0	0	0	0	0	0	68	0	0	0	0	0	0	0	0	0	0	0	0	0	0	0	0	0	0	0	0	0	0	0	0
f5dbdf94144ce94c9740baeb48d1deab	0	0	0	0	0	0	0	0	0	0	0	0	0	0	0	0	0	0	0	0	0	0	0	0	0	0	0	0	0	0	0	0	0	0	0	0	13	0	0	0	0	0	0	0	0	0	0	0	0
50f3ee3593b923fe32e48a8580a9d688	0	0	0	0	0	0	0	0	0	0	0	0	0	0	0	0	0	0	0	0	0	0	0	0	0	0	0	0	0	0	0	0	0	0	0	0	0	0	0	0	0	0	0	0	0	0	0	0	0
48a806dd7c0639d45425afbee7c1db11	0	0	0	107	0	0	0	0	0	0	0	0	0	0	154	32	0	0	72	0	0	61	0	0	0	0	0	0	0	0	0	0	0	67	0	0	0	0	0	0	0	81	0	0	43	0	126	0	21
e9410bee03758ec49e7f157f11e4de6e	0	6	0	0	6	0	0	0	0	0	0	0	0	0	0	0	8	0	0	0	0	0	0	0	0	0	0	0	0	0	0	0	0	0	0	0	0	0	0	0	0	0	0	0	0	0	0	0	0
eaae31dc78f4ccb4917d93df76e9cb26	0	0	0	0	0	0	0	0	0	0	0	0	0	0	0	0	0	0	0	0	0	0	96	0	0	0	0	0	0	0	0	0	0	0	0	0	0	0	0	0	0	0	0	0	0	0	0	0	0
76aac06f9584e70b9723f877a3add724	0	0	0	0	0	0	0	0	0	0	0	0	0	0	0	0	0	0	0	0	0	0	0	0	0	0	0	0	0	0	0	0	0	0	0	0	0	0	0	0	0	0	0	0	0	0	0	0	0
a1db800dd8d0f3b99cea588501999df1	0	0	0	0	0	0	0	0	0	0	0	0	0	0	0	0	0	0	0	0	0	0	0	0	0	0	0	0	0	0	0	0	0	0	0	0	0	0	0	0	0	0	0	0	0	0	0	0	0
20e7b61bfda03a8c8c7596b33e7546b1	0	0	0	0	0	0	0	0	0	0	0	0	0	0	0	0	0	0	0	0	0	0	0	0	0	0	0	0	0	0	0	0	0	0	0	0	121	0	0	0	0	0	0	0	0	0	0	0	0
6e4d8649863acc0db748feac3d939ee4	0	0	0	0	0	0	0	0	0	0	0	0	0	0	0	0	0	0	0	0	0	0	0	0	0	0	0	0	0	0	0	29	0	0	0	0	0	0	0	0	0	0	0	0	0	0	0	0	0
727e0bd1560c711145a77ad5006c936d	0	44	0	0	58	13	0	23	13	0	38	0	98	11	36	0	9	0	0	236	0	0	0	253	0	0	0	0	0	5	0	0	29	15	0	0	61	71	24	133	81	0	0	99	0	0	0	0	0
63b5cd86a7d4487e32a87c960c63c62a	0	0	0	0	0	0	0	0	0	0	0	0	0	0	0	0	0	0	0	0	0	0	0	0	0	0	0	0	0	0	0	0	0	0	0	0	0	0	0	0	20	0	0	0	0	0	0	0	0
76d6479d8436e9ae13882adc9a5ff70f	0	0	0	0	0	0	0	0	0	0	0	83	0	0	0	0	0	0	0	0	0	0	0	0	0	0	0	0	0	0	0	0	0	0	0	0	0	0	0	0	0	0	0	0	0	0	0	0	0
a3452f6fae3aac7b89d5be38f8e95c92	0	0	0	0	0	0	0	0	0	0	0	0	0	0	0	0	0	0	0	0	0	0	0	12	0	0	0	0	0	0	0	0	0	0	0	0	0	0	0	0	0	0	0	0	0	0	0	0	0
df3f2273b984edb8e77873524fd88ef8	0	0	0	0	0	0	0	0	0	0	0	0	0	0	0	0	0	0	0	0	0	0	0	0	0	0	0	0	0	0	0	0	0	0	10	0	0	0	0	0	0	0	0	0	0	0	0	0	0
da1b2969c84926dac78c688db53b25eb	0	138	0	0	0	0	0	0	0	0	0	0	0	0	0	0	0	0	0	0	0	0	0	0	0	0	0	0	0	0	0	0	0	0	0	0	0	0	0	0	0	0	0	0	0	0	0	0	0
adbbd6ba0202677f681b98bd2cc98341	0	16	0	0	20	15	0	0	0	0	0	0	76	0	0	0	51	0	0	0	0	0	0	0	0	0	0	16	0	0	0	0	0	36	0	0	0	0	0	0	0	0	0	76	0	0	48	0	0
e1b2b6ae4af6686429c21926cc0314a0	0	0	0	0	0	0	34	0	0	0	19	0	0	0	0	0	0	0	72	0	0	0	0	0	0	0	0	0	0	23	0	27	0	0	0	0	0	0	42	0	0	0	0	0	0	0	0	0	0
cdc308b6da2ad151dc3f54332fd8c448	1601	120	0	36	119	453	77	107	523	4	30	0	711	109	702	26	46	77	288	439	0	32	0	116	55	102	46	1192	0	22	0	72	282	443	0	42	291	240	55	377	419	54	41	397	56	34	475	22	367
ee47f6cb4042690e37ca3fe89af8a272	0	0	0	0	0	0	0	0	0	0	45	0	0	0	0	0	0	0	0	0	0	0	0	0	0	0	0	0	0	0	0	0	0	0	0	0	0	0	0	0	0	0	0	0	0	0	0	0	0
c4010c87c31e7cbeecf98d82a7dbf273	0	0	0	0	49	0	0	0	0	0	0	0	0	0	0	0	0	0	0	0	0	0	0	0	0	0	0	0	0	0	0	0	0	0	0	0	0	0	0	0	0	0	0	0	0	0	0	0	0
e6b1c5ec42d56c8a6fd78e4981bdf8b1	0	0	0	0	0	0	0	0	0	0	0	0	0	0	0	0	0	0	0	0	0	0	0	0	0	0	0	0	0	0	0	0	0	0	0	0	0	0	0	0	0	0	0	0	0	0	0	0	0
7a501bd9c9c93d90faaaa3d7ee2bd229	0	0	0	0	0	11	0	0	0	0	0	0	0	0	0	0	0	0	0	0	0	0	0	0	0	0	0	0	0	0	0	0	0	0	0	0	0	0	0	0	0	0	0	0	0	0	0	0	0
66a439de09b0a9c10f98a5c7becdc81b	0	0	0	0	0	0	0	190	0	101	0	71	0	31	0	44	34	0	0	0	0	0	323	43	0	24	0	0	108	0	0	0	0	0	154	0	0	0	0	0	0	0	0	0	0	0	37	0	0
bd6f26eeb5223411ee781fef104e256b	23	128	41	40	133	0	46	94	15	87	48	214	7	57	0	37	15	91	27	28	0	32	44	0	83	40	19	0	214	61	0	0	10	0	170	0	211	0	111	168	0	58	151	0	36	10	25	39	0
c17d4910a441181b2d2aec3a6838e561	0	0	0	0	0	0	0	0	0	0	0	0	0	0	0	116	14	0	0	0	0	0	0	0	0	0	0	0	0	61	0	0	0	27	0	0	0	0	0	0	0	0	0	0	0	0	0	0	0
5016be533187e5c2909d31464ad41c12	0	0	0	0	0	0	0	0	0	0	0	0	0	0	0	31	0	0	0	0	0	0	0	0	0	0	0	0	0	0	0	0	0	0	0	0	0	0	0	0	0	0	0	0	0	0	0	0	0
61e348afd6c79ed642d45501ad33ab82	0	0	0	0	0	0	0	0	0	0	0	0	0	0	0	0	0	0	0	0	14	0	0	0	0	0	0	0	0	0	0	0	0	0	0	0	0	0	0	0	0	0	0	0	0	0	0	0	0
636a724f8c55e6c275fc04aa1b9df038	0	0	0	0	0	0	0	0	0	0	0	0	0	0	0	0	0	0	0	0	0	0	0	0	0	0	0	0	0	0	0	0	0	0	0	0	1050	0	0	0	0	0	0	0	0	0	0	0	0
7c502e89aac8b2f88bdeaff8933ab5df	0	0	0	0	0	0	0	0	0	0	0	0	0	0	0	0	0	0	0	0	0	0	0	0	0	0	0	0	0	0	0	0	0	48	0	0	0	0	0	0	0	0	0	0	0	0	0	0	0
f8241d42032ab4c784ff283e53481d93	235	0	77	300	0	1324	0	141	105	0	21	0	0	0	59	0	0	40	69	24	480	275	128	0	29	0	197	0	0	0	108	17	62	71	0	25	0	277	27	219	357	405	30	0	366	281	0	96	0
38621b565c23a03890105adb044a757e	0	0	0	0	0	0	0	0	0	0	0	0	0	0	0	0	0	0	0	11	0	0	0	0	0	0	0	11	0	0	0	0	0	0	0	0	0	0	0	0	0	0	0	0	0	0	0	0	0
ca6c2b3b469c08212142e8821c65882a	0	0	0	0	0	7	0	0	0	0	0	0	0	0	0	0	0	0	0	0	0	0	0	0	0	0	0	0	0	0	0	0	200	0	0	0	0	0	0	0	0	0	0	0	0	0	0	0	0
1c235fb5d1e7cd63aabf81945c3249a9	23	210	157	85	188	322	33	161	63	17	107	43	203	42	132	42	148	75	109	118	70	80	48	71	136	88	103	73	38	88	102	96	0	328	94	145	199	196	71	353	204	228	46	227	144	73	252	83	104
15eafc19b87c2f1fa6b4af44c119a5c1	0	0	0	0	0	0	0	0	0	0	0	0	435	0	0	0	0	0	0	0	0	0	0	0	0	0	0	0	0	0	0	0	0	0	0	0	0	0	0	0	0	0	0	0	0	0	0	0	0
a904e25a4d59374509f4ea28121aea6d	0	0	0	0	0	0	22	0	0	0	0	0	0	0	0	0	53	0	0	0	0	0	0	0	0	0	0	0	0	0	0	0	0	0	0	0	0	0	0	0	0	0	0	0	0	0	0	0	0
588fe5f2db364b9b19cbd3d4e52fcb5c	0	0	0	0	0	0	0	0	0	0	0	0	0	0	0	0	0	0	0	0	0	0	0	0	0	0	0	0	0	0	0	0	0	0	0	0	0	0	0	0	0	0	0	0	0	0	0	0	0
79db8d2eb5e65bcd8a32f37c175d9db0	0	19	0	0	25	0	0	5	0	4	0	0	0	0	0	0	0	4	0	0	0	6	0	0	8	0	0	0	15	0	8	0	0	0	5	0	0	0	0	0	0	0	0	0	0	0	0	3	0
c6d17b790fb3703782284e3b1a360cbd	0	0	0	0	0	0	0	0	0	0	0	0	0	0	0	48	0	0	0	0	0	0	0	0	0	0	0	0	0	0	0	0	0	0	0	0	0	0	0	0	0	0	0	0	0	0	0	0	0
88a29a47edc1844039553056b248f868	0	0	0	0	0	64	0	0	0	0	0	0	0	0	0	0	0	0	0	0	0	0	0	0	0	0	0	0	0	0	0	0	0	0	0	0	0	0	0	0	0	0	0	0	0	0	0	0	0
b1cfc06fe1b82baa88ddee8742edda85	0	0	0	0	0	0	0	0	0	0	0	0	0	0	0	0	0	0	0	0	0	0	0	0	0	0	0	0	0	0	0	0	0	0	0	12	0	0	0	0	0	0	0	0	0	0	0	0	0
e7127ef0d1a39a09bd504dfa9bd50baf	0	315	219	0	438	176	0	114	47	0	104	187	73	29	0	17	29	0	0	101	0	0	31	0	79	0	36	0	59	67	0	0	0	0	0	79	168	58	18	145	75	0	17	45	0	176	54	0	0
92a027934c9aee03733f8cbcb97d9f64	0	0	0	0	0	0	0	0	0	0	0	0	0	0	0	0	0	0	0	0	0	0	0	0	0	0	0	0	0	0	0	26	0	0	0	0	0	0	0	0	0	0	0	0	0	0	0	0	0
576046c7ec38b13955c0a8abdfec1a54	0	0	0	0	0	0	0	0	0	0	0	0	0	0	0	0	0	0	0	0	0	0	0	0	0	0	0	0	0	0	0	0	0	0	0	0	0	0	0	0	0	43	0	0	0	0	0	0	0
e6f9faa501a3c7d8e0bd63b202bad07d	0	0	0	11	0	29	0	0	62	0	24	0	28	0	0	0	52	0	0	151	6	11	0	27	0	0	0	72	34	0	0	0	0	33	0	9	0	73	0	19	74	0	0	65	0	22	0	0	59
78f531d7d50ffbae9b0b3057bd61786b	0	0	0	0	0	0	0	0	0	0	32	0	0	0	0	0	0	0	0	0	0	0	0	0	0	0	0	0	0	0	0	0	0	0	0	0	0	0	0	0	0	0	0	0	0	0	0	0	0
f6625908d4877a19d1aa1bfdc5933ff1	0	0	0	0	0	0	0	0	0	0	0	0	0	0	0	0	0	0	0	0	0	0	0	0	0	0	0	0	0	0	0	0	0	0	0	0	0	0	0	0	0	0	0	0	0	0	0	33	0
f5d34a3300f88f7cab20786baa10f68b	531	85	36	57	148	58	13	93	387	14	27	13	52	18	223	122	18	0	128	146	131	46	249	14	225	21	234	912	61	0	164	57	250	115	37	27	129	88	140	261	126	31	173	318	40	274	195	27	62
90ebba82f40b7301716fe91e51e3118d	0	0	0	0	0	0	0	0	0	0	0	0	0	0	0	0	0	95	0	0	0	0	0	0	0	0	0	0	0	0	0	0	0	0	0	0	0	0	0	0	0	0	0	0	0	0	0	0	0
e6465f2d8cf2d43ce3832222ac534a6f	0	0	0	0	0	0	0	0	0	0	0	0	0	0	0	0	0	0	0	0	0	0	257	0	0	0	0	0	0	0	0	0	0	0	0	0	0	0	0	0	0	0	0	0	0	0	0	0	0
9df1d34a857a656f5cd3e44c2cc9530c	13	0	0	114	0	17	235	9	0	165	106	58	0	318	0	68	22	211	10	0	23	88	4	23	58	226	269	0	254	88	191	59	0	38	241	32	556	5	166	157	8	96	87	0	54	299	10	64	22
2d85ca357bc85db5edde00563239ce6d	0	0	0	0	0	0	0	0	0	0	0	0	0	0	0	0	0	0	0	0	0	0	0	0	0	0	0	0	0	0	0	0	0	0	0	0	0	0	0	0	0	0	0	0	0	0	0	0	0
43d0db8cb94379435c0334d87465f570	0	0	0	0	0	0	0	0	0	0	0	0	0	0	0	0	0	0	0	0	0	0	0	0	0	0	0	0	0	0	0	0	57	0	0	0	0	0	0	0	0	0	0	0	0	0	0	0	0
2f284182cdd43539eecebffb0e8a3606	0	0	0	0	0	0	0	0	0	0	0	0	0	0	0	0	0	0	0	0	0	0	0	0	50	0	0	0	0	0	0	0	0	0	0	0	0	0	0	0	0	0	0	0	0	0	0	0	0
ce5cf3796fd0fc03d5e305a3296c04ce	0	0	0	0	0	0	0	0	0	0	0	0	0	0	0	0	53	0	0	0	0	0	0	0	0	0	0	0	0	0	0	0	0	0	0	0	0	0	0	0	0	0	0	0	0	0	0	0	0
eca6def1afe6b1f697cdb16db14a4aba	0	0	0	0	0	0	0	0	0	0	0	0	0	0	0	0	0	0	0	0	0	0	0	0	0	0	0	0	0	0	0	0	0	0	0	0	0	0	0	0	0	0	0	0	0	0	0	0	0
11ae8a8159536bf9eedaef67cdfc4727	0	0	0	0	0	0	0	0	0	0	0	0	0	0	0	0	0	0	0	0	0	0	0	0	0	0	0	0	0	0	0	0	0	0	0	0	0	0	0	0	0	0	0	0	0	0	0	0	0
0b98f16ad684c73820f41272c29535d4	0	79	0	41	102	13	0	0	0	0	34	0	0	0	0	31	23	0	0	0	0	42	0	21	38	0	0	0	28	71	0	54	19	0	0	0	0	0	0	63	0	0	154	0	0	64	0	19	0
36c1c8d423bf4e94b2316eadc34a4ed9	0	0	0	0	0	0	0	22	0	0	0	0	0	0	0	0	0	0	0	0	0	0	0	0	0	0	0	0	0	0	0	0	0	0	0	0	0	0	0	0	0	0	0	0	0	0	0	0	0
363badfa29fc12a40bc7ff436ff8f87b	0	0	0	0	0	0	0	0	0	0	0	0	10	0	0	0	0	0	0	0	0	0	0	0	0	0	0	0	0	0	0	0	0	0	0	0	0	0	0	0	0	0	0	0	0	0	0	0	0
b8378a8628307594e4b8895c6c278058	0	0	0	0	0	0	0	0	0	0	0	0	0	0	0	0	0	593	0	0	0	0	0	0	0	0	0	0	0	0	0	0	0	0	0	0	0	0	0	0	0	0	0	0	0	0	0	0	0
6fb2b1db81fb5ad1ae711cb4b2d54ad7	0	0	0	0	0	0	0	0	0	0	0	0	0	0	0	0	0	0	0	0	0	0	0	0	0	0	0	0	0	0	0	0	0	0	0	0	0	0	0	0	0	0	0	0	0	0	0	0	0
da31cccd238fdfaf5e34aab37898c258	144	233	120	213	235	290	126	95	200	24	186	45	72	195	299	31	91	56	387	187	1754	171	48	0	162	97	72	563	90	956	83	269	1700	50	70	209	5156	164	38	434	136	144	29	0	117	741	38	92	0
56cf7a020811d5d23a5f7783b32dabf4	0	0	0	0	0	0	0	0	0	0	0	0	0	0	0	0	0	0	0	0	0	0	0	0	0	0	0	0	0	0	0	0	0	0	0	0	0	0	0	0	0	0	0	0	0	0	0	0	0
4a7743e06e8ace0dbb9be24ca069e00d	0	0	0	0	0	0	0	0	0	0	0	0	0	0	0	0	0	0	0	0	0	0	0	0	0	0	0	0	0	0	0	0	0	0	0	0	0	0	0	0	0	0	0	0	0	0	0	0	0
15b27fb84666cab3eaebcd5b0034e3fa	0	0	0	0	0	0	0	0	0	0	0	0	0	0	0	0	0	0	0	0	0	0	0	0	0	0	0	0	90	0	0	0	0	0	0	0	0	0	0	0	0	0	0	0	0	0	0	0	0
5fef3d4ff6a1e976f8d10d29a8c2389d	0	0	0	0	0	0	0	0	0	0	0	0	0	0	0	0	11	0	0	0	0	0	0	0	0	0	0	0	0	0	0	0	0	0	0	0	0	0	0	0	0	0	0	0	0	0	0	0	0
6cfbfb88ac813e93917f700807ff55ff	0	0	0	0	0	0	0	0	0	0	0	0	0	0	0	0	0	0	0	0	0	0	0	0	0	0	0	0	114	0	0	0	0	0	0	0	0	0	0	0	0	0	0	0	0	0	0	0	0
1c7f25fe8c101912f40620400fcb4188	0	0	0	0	0	0	0	0	0	0	0	0	0	0	0	0	0	0	0	0	0	0	0	0	0	0	0	0	14	0	0	0	0	0	0	0	0	0	0	0	0	0	0	0	0	0	0	0	0
5d6302ad818754ba8ec113ee638c8d1a	0	44	0	61	0	49	0	0	0	68	107	0	32	85	0	0	0	166	44	0	0	47	0	0	0	103	0	0	198	139	0	0	0	0	101	0	94	0	44	199	0	96	94	0	32	0	0	0	0
fbc2300d3d72e9b117416c86ea3bbd68	0	0	0	0	0	0	0	0	0	0	0	0	0	0	0	0	0	0	0	0	0	0	0	0	0	0	0	0	0	0	0	0	0	0	0	0	0	0	0	0	0	0	0	0	0	0	0	0	0
b923bbe74b220403f80f4d2e7b46cc4a	8	71	39	24	56	20	0	92	74	51	24	62	23	13	44	53	11	0	3	26	0	19	46	0	61	8	234	0	70	0	234	0	9	101	65	0	32	34	10	19	42	13	0	0	8	170	0	13	0
6dee545d1e50e4c73238ac67757ec01d	0	0	0	0	0	0	0	0	0	0	0	0	0	0	0	0	0	0	0	0	0	0	0	0	0	0	0	0	0	0	0	0	0	0	0	0	0	0	0	0	0	0	0	42	0	0	0	0	0
b66181a84b15aee60b1e2aa6c24dff9b	0	0	0	0	0	0	0	0	0	0	0	0	0	0	0	0	0	0	0	0	0	0	0	0	0	0	0	0	11	0	0	0	0	0	0	0	0	0	0	0	0	0	0	0	0	0	0	0	0
0cfb5d2ed1046b3ef3470dc236aea3fc	63	130	672	199	121	201	0	50	226	117	499	149	694	125	1070	468	297	0	334	296	129	113	667	183	94	114	70	121	695	134	56	125	65	407	439	31	611	123	103	470	120	457	86	896	406	65	569	375	555
75e2b91cb8b697a8672f792a118c40bd	0	0	0	0	0	0	0	0	0	0	51	0	0	0	0	0	0	0	0	0	0	0	0	0	0	0	0	0	0	0	0	0	0	0	0	0	0	0	0	0	0	0	0	0	0	0	0	0	0
76875ce2d93ce0093f8aba7c5ac9c94d	0	0	0	0	0	0	0	0	0	0	0	0	0	0	0	0	0	0	0	0	0	0	0	0	0	0	0	0	0	17	0	0	0	0	0	0	0	0	0	0	0	0	0	0	0	0	0	0	0
a140f2bc2ee51c61ee1c0f2f9239baa2	0	0	0	0	0	0	0	0	0	0	0	0	0	0	0	0	0	0	0	0	0	0	0	0	0	0	0	0	0	0	0	0	0	0	0	0	0	26	0	0	0	0	0	0	0	0	0	0	0
613814d1aa0a412a5047f9443523deda	0	0	0	0	0	0	0	0	0	0	0	0	0	0	0	0	0	0	0	0	0	0	0	0	0	0	0	0	0	0	0	0	0	0	0	0	16	0	0	0	0	0	0	0	0	0	0	0	0
bebf4f6deb4e9ab941c418e227aa45ef	0	0	0	0	0	37	0	30	0	0	0	0	77	0	21	43	32	0	47	0	0	0	0	0	0	31	0	109	0	0	0	0	0	339	0	52	0	55	0	68	62	0	0	315	36	0	37	0	0
f7120142efa09aaa9733f3fbec9051c3	0	0	0	0	0	0	0	0	0	0	0	0	0	0	0	0	0	0	0	0	0	0	0	0	0	0	0	0	0	0	0	0	0	0	0	0	0	0	0	0	0	0	0	0	0	0	0	0	0
87017e79ef4ed1c1b448bb30d0fdda0b	0	0	0	0	0	0	0	0	0	0	0	0	0	0	0	0	0	0	0	0	0	0	0	0	0	0	0	0	0	0	0	0	0	0	0	0	0	0	0	0	0	0	26	0	0	0	0	0	0
3667ab1fba39410ec49cfbc35144a659	0	0	0	0	0	0	0	0	0	0	0	0	0	0	0	0	0	0	0	0	0	0	0	0	0	0	55	0	0	0	0	0	0	0	0	0	0	0	0	0	0	0	0	0	0	0	0	0	0
c94daa04d13971f36e6599fad3168256	189	41	44	222	70	130	106	8	61	34	311	31	21	0	58	119	20	35	404	185	0	238	65	39	66	9	140	136	87	2354	110	291	413	20	76	419	51	102	22	362	73	171	178	53	158	38	0	27	0
f7ab6c6e95ac879385bb07db8cc615d0	0	0	0	0	0	0	0	0	0	0	0	0	0	0	0	0	0	0	0	0	0	0	0	0	0	0	0	0	0	0	0	0	0	0	0	0	0	0	0	0	0	0	0	0	0	0	0	0	0
b59e86c6b4a6749d192021efda840b7a	0	0	0	0	0	0	0	0	0	0	0	0	0	0	0	305	0	0	0	0	0	0	0	0	0	0	0	0	0	0	0	0	0	0	0	0	0	0	0	0	0	0	0	0	0	0	0	0	0
6c664c51b5d74c64dc8fe351c3ae9ba0	9	0	37	25	0	12	5	0	7	12	9	0	10	26	13	9	14	15	11	8	16	0	0	5	0	16	0	27	0	9	0	0	0	17	0	8	0	7	24	0	20	9	0	17	10	0	0	8	4
2c19aa6531e8160b4ef0c6ccf99e0f24	0	0	0	0	28	0	0	0	0	0	0	0	0	0	0	0	0	0	0	0	0	0	0	0	0	0	0	0	0	0	0	0	0	0	0	0	0	0	0	0	0	0	0	0	0	0	0	0	0
162bb97519be5f548916f3d338d3db72	0	0	0	0	0	0	0	0	0	0	0	0	0	0	0	0	0	0	0	0	49	0	83	0	0	0	0	0	0	0	0	0	0	0	0	0	0	0	0	0	0	0	0	0	0	0	0	0	0
80a457181d621516d7db1e611d7a57b6	0	0	0	0	0	0	0	0	0	0	0	0	0	0	0	0	0	0	0	0	0	0	0	0	0	0	0	0	0	0	0	0	0	0	0	0	0	50	0	0	55	0	0	0	0	0	0	0	7
c9402d29b6ecb4375212b3b26dc34e5c	0	0	0	0	0	0	0	0	0	0	0	0	0	0	0	32	0	0	0	0	0	0	0	0	0	0	0	0	0	0	0	0	0	0	0	0	0	0	0	0	0	0	0	0	0	0	0	0	0
d1372d8d07ee9557ddda37255c583dbf	0	0	0	0	0	0	0	0	0	0	0	0	0	0	0	0	0	0	0	0	0	0	0	0	0	0	0	0	0	0	0	0	0	0	0	0	0	0	0	0	0	21	0	0	0	0	0	0	0
06cbe3ecc8f64893945bc1f777a9ca9e	0	0	0	0	0	0	0	0	0	0	0	0	0	0	0	0	0	0	0	0	0	0	0	0	0	0	0	0	0	0	0	0	0	12	0	0	0	0	0	0	0	0	0	0	0	0	0	0	0
545ae23ba01ce7aa35cb5653c067989a	0	0	17	0	0	0	0	0	0	0	0	0	0	0	0	0	0	0	0	0	0	0	0	0	0	0	0	0	0	0	0	0	0	0	0	0	0	0	0	0	0	0	0	0	0	0	0	0	0
6e17523564240bd9e276020ca87469f6	0	0	0	0	0	0	0	10	0	0	0	0	0	0	0	0	0	0	0	0	0	0	0	0	0	0	0	0	0	0	0	0	0	0	0	0	0	0	0	0	0	0	0	0	0	0	0	0	0
c703c4dfec1d9b340cfa76a85d678ad6	0	216	0	0	217	0	0	0	0	0	0	0	0	0	0	0	0	0	0	0	0	0	0	0	0	0	0	0	0	0	0	0	0	0	0	0	0	0	0	0	0	0	0	0	0	0	0	0	0
23145b1c7eaff74204caefaf2fd5e4f2	0	0	0	0	0	0	0	0	0	0	0	0	0	0	0	30	0	0	0	0	0	0	0	0	0	0	0	0	0	0	0	0	0	0	0	0	0	0	0	0	0	0	0	0	0	0	0	0	0
e6cda4e058fe51214187c39ed38d5ad0	0	0	0	0	0	0	0	0	0	0	0	0	0	0	0	0	0	0	0	0	0	0	0	0	0	0	0	0	0	0	0	0	0	0	0	0	0	0	0	0	0	0	0	0	0	0	0	0	0
f1eeb951a51534cbd73c5ae9cc56397a	0	7008	0	112	6260	218	0	221	104	0	0	0	0	0	146	0	209	0	183	0	61	456	51	186	0	0	90	0	51	0	87	45	0	181	125	44	572	0	0	0	157	50	0	0	35	0	101	0	0
3abc4c5a0a37e8f4bb368cbd62c4adff	0	0	0	0	0	0	0	0	0	0	0	0	0	0	0	0	0	0	0	0	0	0	0	0	0	0	0	0	0	0	0	0	0	0	0	0	0	0	0	0	0	182	0	69	202	43	0	0	0
b193f7de440f630438ea3ff37af04f6f	0	0	0	0	0	0	0	0	0	0	0	0	0	0	0	0	0	0	0	0	0	0	0	0	0	0	0	0	0	32	0	0	0	0	0	0	0	0	0	0	0	0	0	0	0	0	0	0	0
6d57fbd30c62ab64a81f01c3a6bbe16c	0	0	0	0	0	0	0	0	0	0	0	0	0	0	0	12	0	0	0	0	0	0	0	0	0	0	0	0	0	0	0	0	0	0	0	18	0	0	0	0	0	0	0	0	0	0	0	0	0
8a0f0b8ed76ebef95c68d6c20c0a39f1	0	106	0	0	119	0	0	82	0	0	0	0	0	0	0	18	0	0	0	28	0	0	0	201	0	0	50	49	0	0	142	72	0	0	0	30	511	39	0	0	31	22	540	661	37	0	48	0	0
be1b7bd0099885a7dae0baeda0c9e27f	69	0	0	302	0	0	0	0	0	0	0	0	0	1139	122	0	0	106	204	0	46	207	0	0	0	634	0	0	0	291	0	0	384	66	0	168	0	0	0	210	46	65	334	0	0	292	392	70	184
f1e6ceba49b3ed8676fe8fe569e3d79e	0	0	0	0	0	0	0	0	0	0	0	0	0	0	0	0	0	0	0	0	0	0	0	0	0	0	0	0	0	0	0	0	0	0	0	0	24	0	0	0	0	0	0	0	0	0	0	0	0
cfde6a6088a3e3f2e920d87432b29e83	0	0	0	0	0	0	9	0	0	0	0	0	0	0	0	12	0	0	0	11	0	4	0	0	0	0	0	0	0	0	0	0	74	0	0	0	0	6	0	0	0	0	0	0	0	8	11	0	0
0b45e13b1054ad525edad34424c9c949	0	0	0	0	0	0	0	0	0	0	0	0	14	0	0	0	0	0	0	0	0	0	0	0	0	0	0	0	34	0	0	0	0	0	0	0	0	0	0	0	0	0	0	0	0	0	48	0	0
9c92e90bf1d53018363d61fd13d20226	0	0	0	130	0	49	63	83	16	38	0	0	0	130	0	77	98	0	0	70	0	89	58	0	258	132	298	0	138	100	292	285	0	65	65	0	1621	86	130	187	69	0	545	14	0	67	0	35	15
a47397b102b7778dd75f6be8e0c6dcc2	0	0	0	0	0	0	0	0	0	0	0	0	0	0	0	0	0	0	0	0	0	0	0	0	0	0	0	0	0	0	0	0	0	0	0	0	0	0	0	0	0	0	0	20	0	0	0	0	0
4f971674153b56d273136e9de5395c46	0	0	0	0	0	0	0	0	0	0	0	26	0	0	0	0	0	0	0	0	0	0	0	0	0	0	0	0	0	0	0	0	0	0	0	0	0	0	0	0	0	0	0	0	0	0	0	0	0
fb71df9c838e689ff21ae1c10f255756	0	0	0	0	0	0	0	0	0	0	0	0	0	0	0	0	0	0	0	0	0	0	0	0	0	0	0	0	0	0	0	0	0	0	0	0	0	0	0	0	0	0	0	0	0	0	0	0	0
87f19fba5d11fe82075b98b597920dee	0	0	0	0	0	0	0	0	0	0	0	0	0	0	0	0	0	0	0	0	0	0	0	0	0	0	0	0	0	0	0	0	0	0	0	0	0	0	0	0	0	0	0	0	0	0	0	0	22
b75b8101d2e05c372fc2c6c50a9dbae1	0	0	0	0	0	0	0	0	0	0	0	0	0	0	0	0	0	0	0	0	0	0	0	0	0	0	0	0	0	0	0	0	0	0	0	0	0	0	0	0	0	0	0	0	0	0	0	0	0
fd62685ebd8fe8f77c542ad95cd28328	0	0	0	156	0	0	269	0	0	0	0	0	0	113	0	0	161	0	43	0	0	112	0	0	0	80	0	0	0	0	0	0	0	0	0	179	0	0	0	0	0	0	0	0	0	0	0	0	0
2c41a09e41cc11a241b4660cdf572631	0	46	91	23	20	61	19	32	23	0	143	20	18	14	0	22	39	69	52	16	0	0	0	14	0	0	0	43	0	91	0	0	98	25	0	18	220	118	0	48	100	51	22	121	32	32	52	0	61
320688ce808d9c2f6abf6ccae528098d	0	0	0	0	0	0	0	0	0	0	0	0	0	0	0	40	0	0	0	0	0	0	0	0	0	0	0	0	0	0	0	0	0	0	0	0	0	0	0	0	0	0	0	0	0	0	0	0	0
8c64dfa1a7497342f379973158fa5aaa	0	0	0	0	0	0	0	0	0	0	0	0	0	0	0	0	0	0	0	0	0	0	0	0	0	0	0	0	0	0	0	0	0	0	0	0	0	0	0	0	0	0	0	0	0	29	0	0	0
f7565c18b8c41c58cf572c3c79f2ecd6	0	22	0	0	0	0	0	0	0	0	0	0	0	0	0	0	0	0	0	0	0	0	0	0	0	0	0	0	0	0	0	0	0	0	0	0	0	0	0	0	0	0	0	0	0	0	0	0	0
1950886f253423f03bb7636502cb02ca	0	0	0	0	0	0	0	0	0	0	0	0	0	0	0	0	0	0	0	0	0	0	0	0	0	0	0	0	0	0	0	44	0	0	0	0	0	0	0	0	0	0	0	0	0	0	0	0	0
981db653c7ea9305d7978138ade7627c	0	0	0	0	0	0	0	146	0	0	0	0	0	0	0	0	0	0	0	0	0	0	0	0	0	0	0	0	0	0	0	0	0	0	0	0	0	0	0	0	0	0	0	0	0	0	0	0	0
82d990f8aa1748b240f8acf0326aa54b	0	0	0	0	0	0	0	0	0	0	0	0	0	0	0	0	0	0	0	0	0	0	0	27	0	0	0	0	0	0	0	0	0	0	0	0	0	0	0	0	0	0	0	0	0	0	0	0	0
33d9ba00084313fb5c18c31efca49f94	0	0	0	0	0	0	0	0	0	0	0	0	0	0	0	0	0	0	0	0	0	0	15	0	0	0	0	0	0	0	0	0	0	0	0	0	0	0	0	0	0	0	0	0	0	0	0	0	0
850b38d5086d5166a55f383c50ad3990	0	0	0	0	0	0	0	26	0	0	0	0	0	0	0	0	0	0	0	0	0	0	0	0	0	0	0	0	0	0	0	0	0	0	0	0	0	0	0	0	0	0	0	0	0	0	0	0	0
3cf3ad09d59200ff9a83489900e4f6cf	0	130	0	0	135	0	0	0	0	0	57	12	0	0	20	0	0	0	0	0	0	0	25	0	0	0	0	0	0	53	0	0	0	0	0	35	67	14	0	0	0	0	0	0	16	23	0	0	0
40aa9eeb3da032cb4c9d2549033dce1e	0	0	0	0	0	0	0	0	0	0	0	0	0	0	0	0	1068	0	0	0	0	0	0	0	0	0	0	0	0	0	0	0	0	0	0	0	0	0	0	0	0	0	0	0	0	0	0	0	0
d9ca9f7abfe9d2b7c4d2d6a8c2541fb5	0	0	0	0	0	0	0	41	0	0	0	0	0	0	0	0	0	0	0	0	0	0	0	0	0	0	0	0	0	0	0	0	0	19	0	0	0	0	0	0	0	0	0	0	0	14	0	0	0
c885734f10f2fe6f313e9f269124f607	0	0	0	0	0	0	0	0	0	0	0	0	0	0	0	0	0	0	0	0	0	0	0	0	0	0	0	0	0	0	0	0	0	0	0	0	0	0	0	0	0	0	0	0	0	0	0	0	0
d005fabc369a28f5c537a4386ceaf092	0	0	0	0	0	0	0	0	0	0	0	0	0	0	0	0	0	0	0	0	0	0	0	0	0	0	0	0	0	0	0	0	0	0	0	0	0	0	0	0	0	0	0	0	0	0	0	59	0
b98c7dbd7a63b843c0477d5132810590	43	0	0	0	0	0	0	0	0	0	0	0	0	0	0	0	0	0	0	0	0	0	0	0	0	0	0	0	0	0	0	0	130	0	0	0	0	0	0	0	0	695	0	0	447	0	61	0	0
2038eb665a1483cc1ca60a753efa55e9	0	0	0	0	0	0	0	0	0	0	0	0	0	0	0	0	0	0	0	0	0	0	0	0	0	0	0	0	0	0	0	0	0	0	0	0	0	0	0	0	0	0	0	0	0	0	0	0	0
0f22906bedeae35c21a0b98ea3834f48	0	0	0	0	0	0	0	0	0	0	0	0	0	0	0	0	0	0	0	0	0	0	0	0	0	0	64	0	0	0	0	0	0	0	0	0	0	0	0	0	0	0	0	0	0	0	0	0	0
2195a2d8ac577646205d9c1d40f5bc05	0	0	0	0	0	0	0	0	0	0	0	0	0	0	0	0	0	0	0	0	0	0	0	0	0	0	0	12	0	0	0	0	0	0	0	0	0	0	0	0	0	0	0	0	0	0	0	0	0
76131e74703316ee8e42086c81e669c7	0	0	0	0	0	0	0	0	0	0	0	0	0	0	0	0	0	0	0	0	0	0	0	17	0	0	0	0	0	0	0	0	0	0	0	0	0	0	0	0	0	0	0	0	0	0	0	0	0
093ad46938d62a30467734bb67234e07	0	0	0	0	0	0	0	0	0	0	0	0	0	0	0	12	0	0	0	0	0	0	0	0	0	0	0	0	0	0	0	0	0	0	0	0	0	0	0	0	0	0	0	0	0	0	0	0	0
111bca26827178fb6a74d53e74596de6	0	283	0	0	888	0	0	0	0	0	0	0	0	0	0	0	0	0	0	0	0	0	0	0	0	0	0	0	0	0	0	0	0	0	0	0	0	0	0	0	0	0	0	0	0	0	0	0	0
5deb3624ac7605a3e173ba4c1b960eb1	0	0	10	0	0	0	0	0	0	0	0	0	0	0	0	0	0	0	0	0	0	0	0	0	0	0	0	0	0	0	0	0	0	7	0	0	0	0	0	0	0	0	0	0	0	0	0	0	0
201b6ba94edd0c70184c9735fb70af61	0	0	12	0	0	0	0	0	0	0	0	0	0	0	0	0	0	0	0	0	0	0	0	17	0	0	0	0	0	0	0	0	0	0	0	0	0	0	0	0	0	0	0	0	0	10	0	0	0
0aa5fae57b01d8e88a09d66135e426fc	0	0	0	0	0	0	0	0	0	0	32	0	0	0	0	0	0	0	0	0	0	0	0	0	0	0	0	0	0	0	0	0	0	0	0	0	0	0	0	0	0	0	0	0	0	0	0	0	0
cc96ff8e384bd69984ccc3d1f616caa8	0	0	0	0	0	0	0	0	0	0	0	0	32	0	0	0	0	0	0	0	0	0	0	0	0	0	0	0	0	0	0	0	0	0	0	0	0	0	0	0	0	0	0	0	0	0	0	0	0
93d5b66fe1e5ae0dacdcfd9d62b67297	0	0	0	79	0	42	0	0	105	0	0	33	74	83	0	54	44	0	0	0	107	57	0	0	65	60	65	0	50	0	30	0	42	0	41	57	22	0	191	0	0	98	0	0	43	0	0	42	0
e7420041c7af0f6fa4f80fc90ae972c6	0	72	11	0	100	0	0	10	0	0	0	0	0	0	6	0	0	0	0	0	0	0	0	0	0	0	0	0	0	0	0	23	0	24	0	0	0	0	0	27	0	0	0	0	0	0	0	0	0
e0e3d1e481a63770f9a1e0c13c8d9a25	67	2296	388	763	2075	740	50	339	233	405	408	20	1527	567	773	91	159	570	1081	191	198	1104	122	263	3428	258	657	572	866	350	432	245	21	894	741	660	970	1873	414	429	1831	1466	0	1449	1488	811	282	331	1470
4c4090376f571b71afffe9f3619127c7	0	1133	71	259	1381	0	102	502	8	75	0	0	1053	37	0	283	459	502	6	261	0	249	178	81	63	22	552	11	184	0	981	0	33	208	174	56	572	0	6	424	34	102	0	0	96	0	124	0	0
3c919d380eb6bef74b20aac0d3489449	0	0	0	0	0	0	0	0	0	0	0	0	0	0	0	0	0	0	0	0	0	0	0	0	0	0	0	0	0	0	0	0	0	0	0	0	0	0	0	0	0	0	0	0	0	0	0	0	0
33a919fc0bfaa3d0d8c981c075d34079	0	0	0	0	0	0	0	0	0	0	0	0	0	0	0	0	0	0	0	0	0	0	0	0	0	0	0	0	0	0	0	0	0	0	0	0	0	112	0	0	101	0	0	0	0	0	0	0	0
9d80f5da868b24c491b13ad701857478	0	271	0	0	366	0	31	0	0	0	0	0	66	0	0	0	72	0	0	22	0	0	73	77	0	0	40	0	35	205	52	35	0	137	0	22	251	0	0	0	0	0	27	0	0	151	0	0	0
ab0f3223816311258858f074a770483f	0	0	0	0	0	0	0	0	0	0	0	0	0	0	0	0	0	0	0	0	0	0	0	0	25	0	0	0	28	0	0	0	0	0	15	0	0	0	0	0	0	0	0	0	0	0	0	0	0
e4a24639af90e72c02ed97d2b72bf514	0	0	0	0	0	0	0	0	16	0	61	0	0	0	10	0	0	0	0	0	0	0	0	106	136	0	0	0	0	0	0	0	0	12	0	0	0	0	0	0	0	38	0	42	23	0	0	0	7
8d988a036c6432fdd4daf57638e87af3	0	0	654	0	0	445	0	321	233	0	0	0	114	0	408	36	0	0	0	0	0	0	16	0	0	0	0	1398	0	0	0	0	0	0	0	0	0	61	0	0	74	0	0	240	0	42	2932	0	0
8c8cde1ae9d644c6eba2aced0c3047fd	0	0	0	0	0	0	0	0	0	0	0	0	0	0	0	0	0	0	0	0	0	0	0	0	0	0	0	0	68	0	0	0	0	0	0	0	0	0	0	0	0	92	0	0	103	0	0	0	0
36a0e7c1e1069421e8ef77883e7492ef	0	0	0	0	0	0	0	0	0	0	0	0	0	0	0	0	0	0	0	0	0	0	0	0	0	0	0	0	0	0	0	0	0	0	0	0	48	0	0	0	0	0	0	0	0	0	0	0	0
9f82df4a4194af9124813e33e131bc29	0	0	0	0	0	0	0	50	5	0	0	0	8	0	0	0	0	0	0	0	0	0	0	0	0	0	117	143	0	0	10	0	20	237	0	0	58	0	12	0	0	0	45	102	0	0	0	0	0
6f5088e3b9451581d29b3e4b55f4de0f	0	0	0	0	0	0	0	0	0	0	0	0	0	0	0	0	0	0	0	0	0	0	0	0	0	0	0	0	0	0	0	0	33	0	0	0	0	0	0	0	0	0	0	0	0	0	0	0	0
6b77f42f15913efba62382ba4a800bd6	0	0	0	0	0	0	322	0	0	0	0	0	0	0	0	0	0	0	79	0	0	0	0	0	0	0	0	0	0	0	0	0	0	0	0	0	0	0	0	0	0	0	0	0	0	0	0	0	0
51897d623dcc9b92dba91a46e4e9d0ae	0	0	0	122	0	0	0	0	0	0	0	0	0	0	0	0	0	0	163	0	0	91	0	0	0	0	0	0	0	0	0	0	0	0	0	0	0	0	0	0	0	92	0	0	0	0	0	0	0
b3470c0df3ebb715ed718e28bb89886e	0	0	0	0	0	0	0	55	0	0	0	0	0	0	0	0	0	0	0	0	0	0	0	0	0	0	0	0	0	0	0	0	0	0	0	0	0	0	0	0	0	0	0	0	0	0	0	0	0
a8b77e3edd175cbceb9ff3c8851490fa	0	0	0	0	0	0	0	20	0	0	0	0	0	0	0	0	0	0	0	0	0	0	0	0	0	0	0	0	0	0	0	0	0	0	0	0	0	0	0	0	0	0	0	0	0	0	0	0	0
38a18b7b00d5965c9014cb1bfb0be05b	0	0	0	0	0	0	0	0	0	0	0	0	0	0	0	0	0	0	0	0	0	0	0	26	0	0	0	0	0	0	23	0	0	0	15	32	0	0	0	0	0	0	0	0	0	0	0	0	0
b65f6b86b5d42be4f74b3c54806511fc	0	5248	81	151	6053	25	49	1356	42	259	0	430	0	957	140	807	684	142	153	74	159	91	353	366	756	791	0	0	526	252	0	483	34	604	449	0	2019	0	451	1610	0	0	132	94	0	1580	129	0	19
f0dc2d9c01d63a50df96d1f87e6fde55	0	0	0	258	0	0	0	0	0	0	16	56	0	0	37	37	0	91	0	0	121	215	0	62	49	0	0	0	0	64	0	0	51	31	0	0	0	0	45	105	0	43	81	0	27	47	0	83	0
35e8e5ab6506db1af113facaa4bb4497	0	0	0	0	0	0	0	0	0	0	0	0	0	0	0	0	0	0	0	0	0	0	0	0	0	0	0	0	0	0	0	0	0	0	0	0	0	0	0	0	0	0	0	0	0	0	0	0	0
b931be2ddec18b20678a3dc29ecfb48a	0	82	0	0	130	0	0	0	0	0	71	0	0	0	0	0	0	0	0	0	0	0	0	0	0	0	0	0	0	0	0	0	0	0	0	0	0	0	0	0	0	58	0	0	62	139	0	0	0
3f803c6a182a7484832b04d0550ce269	0	0	0	0	0	0	0	0	0	0	0	0	11	0	8	0	0	0	0	0	0	0	0	0	0	0	0	37	0	0	0	0	0	0	0	0	0	18	0	0	22	0	0	0	0	0	0	0	0
568e9b176e1ff26cade8426b42f3bd44	0	0	0	0	0	0	0	0	0	0	0	0	0	0	0	0	0	0	0	0	0	0	0	0	0	0	0	0	0	0	0	0	0	0	0	0	0	0	0	0	0	0	0	0	0	0	0	62	0
b4a44332e6289d0b0433537ed567f917	0	0	0	0	0	0	0	0	0	0	0	0	0	0	0	0	0	0	0	0	0	0	0	0	0	0	0	0	0	0	0	0	0	0	0	0	0	0	0	0	71	0	0	0	0	0	0	0	0
03f3a03f0c0eaafbac54e3a9a75a7969	0	0	44	0	0	0	0	0	0	0	0	0	0	0	0	0	0	0	0	0	0	0	0	0	0	0	0	0	0	0	0	0	0	0	0	0	0	0	0	0	0	0	0	0	0	0	0	0	0
75f579aaf2564d91af4a0c189c2f7cf8	0	0	0	0	0	0	0	0	0	0	0	0	0	0	0	0	0	0	0	0	0	0	0	0	0	0	0	0	0	0	0	0	0	0	0	0	39	0	0	0	0	0	0	0	0	0	0	0	0
933bc03f9a91a0d0a47b9be1dcf0bbda	0	204	0	0	262	0	0	0	0	0	0	0	0	0	0	0	101	55	0	199	0	0	0	0	0	0	0	0	0	0	0	0	0	0	0	0	0	0	0	183	0	0	0	0	0	0	0	0	0
2a1e57106c7b920f75d7212949d4c76e	0	0	0	0	0	0	0	0	0	0	0	0	0	0	0	0	0	0	0	0	0	0	0	0	22	0	0	0	0	0	0	0	0	0	0	0	0	0	0	0	0	0	0	0	0	0	0	0	0
68237fd9c89c7b3d57ecf89cad6f4d52	0	0	0	0	0	0	0	0	0	0	0	0	0	0	0	0	0	0	0	0	0	0	0	0	0	0	0	0	0	0	0	0	0	0	0	0	144	0	0	0	0	0	0	0	0	0	0	0	0
e1c7d97fe13e9127d225d76a1feb8c78	0	0	0	0	0	0	0	0	0	0	0	0	0	0	11	0	0	0	0	0	0	0	0	33	0	0	0	0	0	0	0	0	55	26	0	0	0	0	0	0	0	0	0	0	0	0	0	0	0
3f041b284815104b6954494f730ae3dc	0	0	22	0	0	9	0	0	6	0	0	0	0	0	9	0	0	0	0	21	0	0	0	18	0	0	29	12	0	0	11	0	144	25	0	0	29	0	0	0	12	0	0	0	0	19	0	0	0
3d008a07a63e01193561eb4f27931678	0	0	0	0	0	0	0	0	0	0	0	0	0	0	0	0	0	0	0	15	0	0	0	0	0	0	0	0	0	0	0	0	0	0	0	0	0	0	0	0	0	0	0	0	0	0	0	0	0
0fe68c1e7877d7c09ecd3c14f7a284b6	0	0	0	0	0	0	0	38	0	0	0	0	0	0	0	0	0	0	0	0	38	0	0	0	56	0	86	15	0	0	61	53	46	0	0	26	32	0	0	0	0	0	0	0	16	20	0	0	0
f3845dfb17be587e76f33c2bb54b2e32	0	0	0	0	0	0	0	0	0	0	0	0	0	0	0	0	0	0	0	0	0	0	0	0	0	0	0	0	0	0	0	0	13	0	0	0	0	0	0	0	0	0	0	0	0	0	0	0	0
14124fa517d4d150734f2e47d205d8e3	0	0	0	0	0	0	0	0	0	0	0	0	0	0	0	0	0	0	0	21	0	0	0	0	0	0	0	0	0	0	0	0	0	0	0	0	0	0	0	0	0	0	0	0	0	0	0	0	0
00cdbe8ac9cfd37eff962f160414516d	0	0	0	0	0	0	0	0	0	0	0	0	0	0	0	0	0	0	0	0	0	0	0	0	0	0	0	0	0	0	12	0	0	0	0	0	0	0	0	0	0	0	0	0	0	0	0	0	0
146308362a336316697b59652a35c28b	0	0	0	0	0	0	61	0	0	0	0	0	0	0	0	0	0	0	0	0	0	0	0	0	0	0	0	0	0	0	0	0	0	0	0	0	0	0	0	0	0	0	0	0	0	0	0	0	0
5a83ebb99babd65dbd1bd44d132c6764	0	0	0	0	0	0	0	0	0	0	0	0	0	0	0	0	0	0	0	0	0	0	0	0	0	0	0	0	0	0	0	0	0	0	0	0	0	0	0	0	0	0	0	0	0	0	202	0	0
7425f05249c75b91fb55017ee79f8219	0	0	276	13	0	27	0	0	34	0	0	129	0	0	1131	0	0	0	66	31	0	0	31	0	0	0	0	0	0	0	0	0	751	278	0	0	0	122	0	234	168	0	0	0	0	86	0	0	171
35a62f4f5e21427e1f5d196d757c3220	0	0	0	0	0	0	0	0	0	0	0	0	0	0	0	0	0	0	0	0	0	0	0	0	0	0	0	0	0	0	0	0	0	0	0	0	0	0	0	0	0	0	0	0	0	0	0	0	0
79b3b6c751c001ddeb49b14eb3cba615	0	0	0	0	0	0	0	0	0	0	0	0	0	0	0	0	0	0	0	0	0	0	0	0	0	0	0	0	0	0	0	0	23	0	0	0	0	0	0	0	0	0	0	0	0	0	0	0	0
69c08526c0622ea36b2be19df976d95a	0	0	0	0	0	0	0	0	0	0	0	0	0	0	20	0	0	0	0	0	0	0	0	0	0	0	0	0	0	0	0	0	0	0	0	0	0	0	0	0	0	0	0	0	0	0	0	0	0
1ea50f46c482311f81e065d93c9749dd	0	36	0	0	32	0	0	0	0	0	0	0	0	0	0	0	0	0	0	0	0	0	53	0	0	0	0	0	0	14	0	0	35	0	0	0	195	0	0	15	0	0	0	0	0	22	0	0	0
cea34bccae499d2dd0d8b49534a82cb4	0	0	0	0	0	0	0	0	0	0	0	0	0	0	0	0	0	0	0	0	0	0	0	0	0	0	0	0	0	0	0	0	0	0	0	0	0	0	0	0	0	0	0	0	0	0	0	0	0
935c3a254c6d44d648773f31ab0bcfd3	0	0	0	0	0	0	0	0	0	0	0	0	0	0	33	0	0	0	0	0	0	0	0	0	0	0	0	0	0	0	0	0	0	0	0	0	0	0	0	0	0	0	0	0	0	0	0	0	0
2ba3fa30ec8fd2ce63bd404ecc27fc91	0	0	0	0	0	0	0	0	0	0	0	0	0	0	0	0	0	0	0	0	0	0	0	0	0	0	0	0	0	0	16	0	0	0	0	0	0	0	0	0	0	0	0	0	0	0	0	0	0
d476d82ae76f2d095f53b7b053f89ba4	0	0	0	0	0	0	0	0	0	0	0	0	0	0	0	0	0	0	0	0	0	179	0	0	0	0	0	0	0	0	0	0	0	0	0	0	0	0	0	0	0	0	0	0	0	0	0	0	0
ce845a3796be79194d3ee416027c3e9c	0	0	0	0	0	0	0	0	0	0	0	0	0	0	0	0	0	0	0	0	0	0	0	0	0	0	0	0	0	0	0	0	0	0	21	0	0	0	0	0	0	0	0	0	0	0	0	0	0
12c57c4c553edae230eff62d16787d2c	128	2350	0	695	2555	197	131	40	214	980	1278	0	0	30	12	760	336	0	659	485	0	476	1103	703	0	38	3017	89	1556	187	4086	357	192	630	1557	685	1052	1661	177	2359	1546	725	542	208	500	2606	1391	147	337
efdef90aeaed65177686ff6fa78d3ca4	15	0	10	13	0	0	17	0	23	9	13	0	11	7	21	0	15	24	25	8	11	18	0	0	0	18	0	12	0	7	0	13	0	25	0	0	0	20	8	0	17	8	0	14	26	0	21	17	8
66de51ffff3d5bea851865832c2fba75	0	0	0	0	0	0	0	0	0	0	0	0	0	0	0	0	0	0	0	11	0	0	0	0	0	0	0	27	0	0	0	0	0	0	0	0	0	0	0	0	0	0	0	0	0	0	0	0	0
06f453684560a604c375544f5f896026	0	0	0	0	0	0	0	0	0	0	0	0	0	0	0	0	0	0	0	0	0	0	0	0	0	0	0	0	0	0	0	0	0	0	0	0	0	0	0	0	0	0	0	0	0	0	18	0	0
f7a61a86b1a6b22be903c99870c69c77	0	0	0	0	0	0	0	0	0	0	0	0	0	0	41	0	0	0	0	0	0	0	0	0	0	0	0	0	0	0	0	0	0	21	0	0	0	0	0	0	0	0	0	11	0	0	0	0	0
b656eb8d2ecd7559346825b1c49465b0	0	0	0	0	172	0	0	0	0	0	0	0	0	0	0	0	0	0	0	0	0	0	0	0	0	0	0	0	0	0	0	0	0	0	0	0	0	0	0	0	0	0	0	0	0	0	0	0	0
e06fd7142148fec0c0e1cabdbf4d6f0e	0	0	0	0	0	147	0	326	0	0	0	0	0	0	0	0	0	0	0	0	0	0	0	0	0	0	0	0	0	0	0	0	0	0	0	0	0	147	0	0	259	0	0	0	0	0	0	0	0
d5a57b0d5d2bf35b359e651f7a84170e	0	0	0	0	0	0	0	0	0	0	0	0	0	0	0	0	0	0	0	0	0	0	0	0	0	0	0	0	0	0	0	0	0	0	0	0	0	0	0	0	0	0	0	0	0	0	0	0	0
7879d650e5cfd8dfd69f3863bf5570b6	0	0	0	0	0	0	0	0	0	0	0	0	0	0	0	5	0	0	0	0	0	0	0	0	0	0	0	0	0	0	0	0	0	0	0	0	0	0	0	0	0	0	0	0	0	0	0	0	0
06bb3fa895e072e060638ec1131d0d3c	0	0	0	0	0	0	0	0	0	0	0	0	0	0	0	0	0	0	0	0	0	0	0	0	0	0	0	0	0	0	0	0	0	0	0	0	0	0	0	0	0	0	0	0	0	0	0	0	0
1827e61798d061d0ceb9baac7b642712	0	0	0	0	0	0	0	0	0	0	0	0	0	0	0	0	0	0	0	0	0	0	0	0	0	0	0	0	0	0	0	0	0	0	0	0	0	0	0	0	0	0	0	0	0	0	0	0	0
99820d65448297834ddd1c95c75b019d	0	0	0	0	0	0	0	0	0	0	0	0	0	0	0	0	0	0	0	0	0	0	0	0	0	0	0	0	0	0	541	0	0	0	0	0	0	0	0	0	0	0	0	0	0	0	0	0	0
8a34a1a0b030f4e8682f84234dc91df4	0	0	0	0	0	0	0	0	0	13	0	0	0	0	0	0	0	0	0	0	0	0	0	0	0	0	0	0	0	0	0	0	0	0	0	0	0	0	0	0	0	0	0	0	0	0	0	0	0
f03c69eb79cb7506918fcb4d2f8213bd	0	0	0	0	0	0	0	0	0	0	0	0	0	0	0	0	0	0	0	0	0	0	0	0	0	0	0	0	0	0	0	0	226	0	0	0	0	0	0	0	0	0	0	0	0	0	0	0	0
06a3ce9e6e494366a97000d3c1236a83	0	0	0	0	0	0	0	0	0	0	0	0	0	0	0	0	0	0	0	0	0	0	0	0	0	0	0	0	0	0	0	0	0	0	0	0	0	0	0	0	0	0	0	0	0	0	0	0	0
c96d007a97d04215a3f4f8bb4dbe6a07	0	0	0	0	0	0	0	0	9	0	0	0	0	0	0	0	0	0	8	0	0	0	0	0	0	17	0	0	0	0	1	12	0	11	0	0	0	0	7	0	0	0	0	0	0	0	0	0	0
a843fc211658b32d18ca8567f97f1a1e	6	0	0	0	0	0	0	0	0	0	0	0	0	0	0	0	0	0	0	0	0	0	0	0	0	0	0	0	0	0	0	0	36	0	0	0	0	0	0	0	0	0	0	0	0	0	0	0	0
ac415d145d8b8d41905c1723f7645f3c	0	0	0	0	0	0	0	0	0	0	0	0	0	0	0	0	0	0	0	0	0	0	0	0	0	0	0	0	0	0	0	0	0	0	0	0	0	0	0	0	0	0	0	0	0	0	0	0	0
995346907bd17f070b20afe66e88d16f	0	0	0	0	0	0	0	0	0	0	0	0	0	0	228	0	0	0	0	0	0	0	0	0	0	0	0	0	0	0	0	0	0	0	0	0	0	0	0	0	0	0	0	0	0	0	0	0	0
12a21d2740e788fb69246486c9aafca3	0	0	0	0	0	0	0	0	0	0	0	0	0	0	0	47	0	0	0	0	0	0	0	0	0	0	11	0	0	0	0	0	0	0	0	0	0	22	0	0	0	0	0	29	0	0	0	0	0
8bb6a2008d92c38e1cac7ac780c05778	0	11	0	0	0	0	0	0	0	0	0	0	0	0	0	0	0	0	0	0	0	0	0	0	0	0	0	0	0	0	0	0	0	0	0	0	0	0	0	0	0	0	0	0	0	0	0	0	0
996726991880da394fa6e716d19f3678	0	0	0	0	0	0	0	0	0	0	0	0	0	0	0	0	0	0	0	0	0	0	0	0	0	0	0	0	0	0	0	0	0	0	0	0	0	0	0	0	0	0	0	0	0	0	0	0	0
3d9953950023965d64a8bf2d8924a5c9	0	0	0	0	0	0	0	0	0	0	0	0	0	0	0	0	0	0	0	0	0	0	0	0	0	0	0	0	0	0	0	0	0	0	0	0	70	0	0	0	0	0	0	0	0	0	0	0	0
8f70a3b8a728ece92a79e96de0684380	0	0	0	0	0	0	0	0	0	0	0	0	0	0	0	0	0	0	0	0	0	0	0	0	0	0	0	0	0	0	0	0	0	0	0	0	0	0	0	0	0	0	0	0	0	29	0	0	0
90e55f528002fb9023f17fe9bdcd0893	0	0	0	0	0	0	0	0	0	0	0	0	0	0	0	0	0	0	0	0	0	0	0	0	0	0	0	0	0	0	0	0	0	0	0	0	0	0	0	0	0	0	0	0	0	0	0	0	0
e31f0b60d923767402f10039225509bc	0	0	0	0	0	0	0	0	0	0	0	0	0	0	0	19	0	0	0	0	0	0	0	0	0	0	0	0	0	0	0	0	0	0	0	0	0	0	0	0	0	0	0	0	0	0	0	0	0
3083aa1c0ac6527854b42119e6c9497d	0	0	0	28	0	25	0	0	38	0	73	0	0	0	0	0	0	20	0	0	0	0	0	0	0	0	0	60	0	40	0	15	138	0	0	0	69	0	0	0	0	0	0	0	0	0	0	0	0
7d79b8afe4f4b1462fc07e99dadba932	0	0	0	0	0	0	0	0	0	0	0	0	0	0	0	0	0	0	0	0	0	0	0	0	0	0	0	0	0	0	0	0	0	0	0	0	0	0	0	0	0	0	0	0	0	0	0	0	0
eebdda27b33168f71a49cfa2e2e10008	0	0	0	0	0	0	0	0	0	0	0	0	0	0	0	0	0	0	0	6	0	0	0	0	0	0	0	0	0	0	0	0	26	0	0	0	16	0	0	0	0	0	0	0	0	0	0	0	0
49ac4297fbac742213ccb1b47b70544e	0	0	0	0	0	0	0	0	0	0	0	0	0	0	0	0	0	0	0	0	0	0	54	0	0	0	0	0	0	0	0	0	0	0	0	0	0	0	0	0	0	0	0	0	0	0	0	0	0
46b56d26e16da029bacef2c3ac3c65d2	0	0	0	0	0	0	0	0	0	0	0	0	0	0	0	0	38	0	0	0	0	0	0	0	0	0	0	0	0	0	0	0	0	8	0	0	0	0	0	95	0	0	0	0	0	0	8	0	0
9ff5f4f2627aa6deaba29ff22cb4bf75	0	0	0	0	0	0	0	0	0	0	0	0	0	0	0	0	0	0	0	0	0	0	0	0	0	0	0	0	0	0	0	0	0	0	0	51	0	0	0	0	0	0	0	0	0	0	0	0	0
e652fea2a577aaeacefcbf550b1446dc	0	179	0	0	168	186	0	0	67	0	0	0	0	0	70	0	43	0	0	0	0	0	0	35	72	0	0	0	0	23	0	0	0	41	0	0	0	0	0	191	0	0	0	0	0	936	55	0	0
08b5a397b480019983185c51e1bff4d5	0	0	0	0	0	0	109	0	0	323	178	0	0	42	0	0	0	0	0	0	192	0	0	0	0	56	0	0	470	97	0	0	0	0	520	179	175	0	20	0	0	123	0	0	134	559	0	53	0
f223de50f729a729e6abc05e5563f2dd	0	0	0	0	0	0	0	0	0	0	0	0	0	0	0	0	0	0	0	0	0	0	0	0	0	0	0	0	0	0	0	0	0	0	0	0	0	0	0	0	0	0	0	0	0	0	0	0	0
47c3573d8dfbef89f639178a04a81229	29	0	0	0	0	0	0	0	0	0	0	0	0	0	0	0	0	0	0	0	0	0	0	0	0	0	0	0	0	0	0	0	0	0	0	0	0	0	0	0	0	0	0	0	0	0	0	0	0
04dc31fd7c6f04646b3c18fa13d89a61	0	198	0	0	0	0	0	0	0	0	0	0	0	0	0	0	0	0	0	0	0	0	0	0	0	0	0	0	0	0	0	0	0	0	0	0	0	0	0	0	0	0	0	0	0	0	0	0	0
ebb1ab3e18bdc9c5bf85223274b5895a	0	0	20	0	0	0	0	0	0	0	0	0	27	24	0	0	0	0	0	0	0	17	0	0	0	0	0	16	0	0	0	0	0	0	0	0	0	0	26	0	0	0	0	0	0	0	0	43	0
32331f47b73e0681d12b39777ee49417	0	0	0	0	0	212	0	0	0	0	0	0	0	0	34	0	0	0	26	0	0	0	0	0	69	0	0	0	0	26	0	0	0	77	0	0	0	0	0	0	0	0	0	0	0	0	0	0	0
579314c30fcbb8ae53e6daff0b81a7e1	0	0	0	0	0	0	0	0	0	0	0	0	0	0	0	0	0	0	0	0	0	0	0	0	0	0	0	0	0	0	0	0	0	0	0	0	389	0	0	0	0	0	0	0	0	0	0	0	0
30e5f337ac45e705621503e5f34ced77	66	0	0	0	0	0	0	0	0	0	0	0	0	0	0	0	0	0	0	0	0	0	0	0	0	0	0	0	0	0	0	25	0	0	0	0	0	55	0	0	24	0	0	0	0	0	23	0	37
1b28efedfded46c2f2be083f76bcd871	0	0	0	0	0	0	0	0	0	0	0	0	0	0	0	0	0	0	0	0	0	0	0	0	0	0	0	0	0	0	0	0	0	0	0	0	0	0	0	0	213	0	0	0	0	0	0	0	0
05ba6e4ac64bd5afa806b7dfc4f75960	0	0	0	0	0	0	0	0	51	0	0	0	0	0	0	0	0	0	0	0	0	0	0	0	0	0	0	0	0	0	0	0	0	0	0	0	0	0	0	0	0	0	0	0	0	0	0	0	0
9919bbdd6aceaf706f1c29be87fef5fc	10	0	0	0	0	0	0	0	0	0	0	0	0	0	0	0	0	0	0	0	0	0	0	0	0	0	0	0	0	0	0	0	0	0	0	0	0	0	0	0	0	0	0	0	0	0	0	0	0
e9c3a5725a28df28823567998af67be0	0	547	0	176	548	31	50	112	0	0	89	0	0	52	0	0	158	0	0	0	0	128	86	0	0	44	152	0	0	0	165	87	0	0	0	0	0	0	220	134	0	0	0	0	0	0	0	94	0
3f8028640f3b7e0d4d026057d36c2110	0	0	0	0	0	0	0	0	0	0	0	0	0	0	0	0	0	0	0	0	0	0	0	241	0	0	0	0	0	0	0	0	0	0	0	0	0	0	0	0	0	0	0	0	0	0	0	0	0
1e86f040c7dc5c67ced11b47b5da3e20	0	0	0	0	0	0	0	0	0	0	0	0	0	0	0	0	0	0	0	0	0	0	0	0	0	0	0	0	0	63	0	0	0	0	0	0	0	0	0	0	0	0	0	0	0	0	0	0	0
95372d675ee0327c1c094358c966ee0c	0	0	0	0	0	0	0	0	0	391	0	0	0	0	0	0	0	0	0	0	0	0	0	0	0	0	0	0	1261	0	0	0	0	0	533	0	0	0	0	0	0	0	0	0	0	0	0	0	0
97776c85b6cdbd9f60c2d853f1e915a1	0	0	0	0	0	0	0	0	0	0	0	0	0	0	0	0	0	0	0	0	0	0	0	0	0	0	0	0	0	0	0	0	0	0	0	0	0	0	0	0	0	0	0	0	0	0	0	0	0
15e97923750523197ecf95f3def33a38	0	0	0	0	0	0	0	0	0	0	0	0	0	0	0	0	0	0	0	0	0	0	0	0	0	0	0	0	0	0	0	0	0	0	0	0	0	0	0	0	0	0	0	0	0	0	0	0	0
bc5f94f2704dd536c7ed8686f9c2eb9b	93	0	0	0	0	0	0	0	0	0	0	0	0	0	0	0	0	0	0	0	0	0	0	0	0	0	0	0	0	0	0	0	0	0	0	0	0	0	0	0	0	0	0	0	0	0	0	0	0
1a36b48f41089abf7f14b4c7906edad2	600	765	33	120	555	234	24	84	92	0	330	23	811	77	37	0	0	68	71	0	32	92	0	17	0	56	408	0	153	124	98	71	195	299	41	123	392	220	55	488	326	95	65	208	58	256	0	203	28
59e4a13e8fc5e98d383e0bd38c65a0a9	0	0	0	0	0	0	0	0	0	0	0	0	0	0	0	0	0	0	0	0	0	0	0	0	0	0	0	0	0	0	0	0	0	0	0	0	0	0	0	0	0	0	0	0	0	0	0	0	0
095af11d1df4f2fd7340d475c272ed6d	0	0	0	0	0	0	0	0	0	0	0	0	0	0	0	0	0	0	0	0	0	0	0	0	0	0	0	0	0	0	0	0	0	0	0	0	0	0	0	0	0	0	0	0	0	0	0	0	0
bdbb6c235323153a7a9a7d3545ed1e14	0	31	0	0	45	49	0	26	180	0	0	0	59	0	93	0	18	0	0	270	0	0	14	51	55	0	0	44	0	0	0	0	0	25	0	0	31	83	0	0	58	0	0	0	0	0	35	0	45
e83fe96c5935f547704f33e229db5505	0	0	0	0	0	0	0	0	0	0	0	0	0	0	0	37	0	0	0	0	0	0	0	0	0	0	0	0	0	0	0	0	35	0	0	0	0	0	0	0	0	96	18	0	42	0	0	0	0
088ed848e11907cbcc65ee0bf1975ff9	0	0	0	0	0	0	0	0	0	0	0	0	0	0	0	0	0	0	0	0	0	0	0	45	0	0	0	0	0	0	0	0	0	0	0	0	0	0	0	0	0	0	0	0	0	0	0	0	0
aa402d6f98f2058c41c1f16252c078d8	29	0	0	0	0	0	0	0	0	0	0	0	0	0	44	0	0	0	0	0	0	0	0	0	0	24	0	0	0	0	0	0	0	0	0	0	0	0	0	0	32	0	0	0	0	0	0	0	0
16176e06805a591f37ddd7d1c2177446	0	0	0	0	0	10	197	0	0	0	0	0	86	0	0	26	0	0	39	0	0	0	0	0	0	0	0	0	0	0	0	0	0	0	0	0	0	0	0	0	0	0	0	0	0	0	0	0	105
1ed8ac23f05c83ba17f9cbaa25f30d37	0	0	0	0	0	0	0	0	0	0	0	0	0	0	0	0	0	0	0	0	0	0	0	0	0	0	0	0	0	0	0	0	10	0	0	0	0	0	0	0	0	0	0	0	0	0	0	0	0
82eb4495ebc7acbe0f6d4a67631a4001	0	0	0	0	0	0	0	0	0	0	0	0	0	0	0	0	0	0	0	0	0	0	0	0	0	0	0	0	0	0	0	0	0	0	0	0	0	0	0	0	0	0	0	0	0	0	0	0	0
73331cf2ec1fc2fc295b451ac2255fbd	0	0	0	0	0	0	0	0	0	0	0	0	0	0	0	11	0	0	0	0	0	0	0	0	0	0	0	0	0	0	0	0	0	0	0	0	0	0	0	0	0	0	0	0	0	0	0	0	0
f9e777c7294e0ac0b6fcc226e2b9e997	0	0	0	42	0	0	0	0	0	0	0	0	0	0	0	0	0	0	0	0	0	60	0	0	0	0	0	16	0	0	0	0	14	0	0	0	549	0	0	39	0	0	0	0	0	0	0	0	0
2a28ffa381b08cbad4d99e79de6d4c62	309	4462	666	1011	5329	847	232	3982	66	2050	1766	1856	834	1535	161	1337	3920	1939	208	262	5676	820	825	1087	4317	1325	6128	0	4326	2657	4018	663	184	777	3290	342	2504	302	2053	4044	190	5022	1983	208	2982	5899	282	1456	62
a432bab713f49d842a0651822562b538	31	960	0	361	1124	1	257	216	0	160	157	238	0	140	0	124	49	50	188	237	313	350	211	29	191	130	97	47	181	327	234	44	116	0	223	63	0	1818	389	402	1556	169	0	0	69	191	0	0	0
9bd2b277692e10f90ab9368b958f74f9	0	0	0	0	0	0	0	0	0	0	0	0	0	0	0	0	0	0	0	0	0	0	14	0	0	0	0	0	0	0	0	0	0	0	0	0	0	0	0	0	0	0	0	0	0	0	0	0	0
c09e6c8d161be97002f6f8b57b5bf5e9	0	0	0	0	0	0	0	0	0	0	0	0	0	0	0	0	0	0	0	0	0	0	0	4	0	0	0	0	0	0	0	0	0	0	0	0	6	64	0	0	66	0	0	0	0	0	0	0	0
49e925b3ca2c26fe5d9b114939b7e660	0	0	61	139	0	375	64	65	182	108	194	104	144	196	819	358	50	83	40	197	86	71	212	0	237	364	218	75	491	115	204	62	77	81	475	444	1109	157	145	124	153	217	52	114	82	328	126	279	495
30a787312283879eabdd2fae84d71892	0	0	43	0	0	0	0	0	0	0	0	0	0	0	0	0	0	0	0	0	0	0	0	0	0	0	0	0	0	0	0	0	0	0	0	0	18	0	0	0	0	0	217	0	0	0	226	0	0
9a966dcd3151513f2467ca51c1dbfa46	0	0	0	0	0	0	0	0	0	0	0	0	0	0	0	0	0	0	0	0	0	0	0	0	0	0	0	0	0	0	0	0	0	0	0	0	0	0	0	0	0	0	0	0	0	0	0	0	0
c071ba71a66cedc09bfcfc2819f8deb5	0	0	0	0	0	0	0	0	0	0	0	0	0	0	31	0	0	0	0	0	0	0	0	0	0	0	0	0	0	0	0	0	0	0	0	0	0	0	0	0	0	0	0	0	0	0	0	0	0
c1e12b5e538d3af6e72f54429cbed638	0	48	0	0	97	0	0	301	0	0	0	0	0	0	0	0	0	0	0	0	0	0	2087	0	0	0	0	0	0	0	0	0	0	0	0	0	43	0	0	0	0	0	0	0	0	0	802	0	0
dc4744c223957d3988d893591cfbac0d	0	0	0	0	0	0	0	0	0	0	0	0	0	102	0	0	0	0	0	0	0	0	0	0	0	0	0	0	0	0	0	0	0	0	0	0	0	0	0	0	0	0	0	0	0	0	0	0	0
6d867721b2ad0e55cd8085f7fac666dd	0	0	126	0	0	0	0	0	0	0	0	0	0	0	116	0	0	0	0	0	0	0	0	0	319	0	0	0	0	0	0	0	43	0	0	0	0	25	0	0	21	0	0	0	0	220	0	0	0
4428e82356b01ba55e933eadebf971e0	0	0	0	0	0	0	0	0	0	0	0	0	0	0	0	0	0	12	0	0	0	0	0	0	0	0	0	0	0	0	0	0	0	0	0	0	0	0	0	0	0	0	0	0	0	0	0	0	0
ce72168fbf5e3e014ce3bb524e664041	0	29	28	0	36	16	0	26	0	0	0	0	21	0	12	0	21	0	0	18	0	0	5	18	0	0	16	39	0	0	7	0	72	22	0	0	15	24	0	21	53	0	0	19	0	0	15	0	10
62141148c75d4806e56fb0484d432b5d	145	0	0	0	0	0	0	1	0	0	31	0	0	0	0	24	0	0	10	0	0	0	0	0	22	0	0	0	0	0	0	0	61	12	0	0	0	0	0	0	0	0	25	0	0	16	0	0	0
fd410d774c51511a51fd9993fb6bc747	0	0	0	0	0	0	0	0	0	0	0	0	0	0	0	0	0	0	0	0	0	0	0	181	0	0	0	0	0	0	0	0	0	0	0	0	0	0	0	0	0	0	0	0	0	0	0	0	0
731fb2225703d7e743f4b79bd0c3088c	0	0	0	0	0	0	0	0	0	0	0	0	0	0	0	0	0	0	0	0	0	0	0	0	0	0	0	0	0	0	0	0	0	0	0	0	0	0	0	0	0	0	0	0	0	0	0	0	0
60f989cf2345b8bd34f28ce9681b66ab	0	0	0	0	0	0	0	0	0	0	0	0	0	0	0	0	0	0	0	0	0	0	0	41	0	0	0	0	0	0	0	0	0	0	0	0	0	0	0	0	0	0	0	0	0	0	0	0	0
71dbf5445afa1a5c541e11236996be51	0	0	0	0	0	0	0	0	0	0	0	0	0	0	0	0	0	0	0	0	0	0	0	0	0	0	0	0	0	0	0	0	0	0	0	0	0	0	0	0	0	0	0	0	0	0	0	0	0
b248bf2e460c639e88baba3328116643	0	0	0	0	0	0	0	0	0	0	0	0	0	0	0	0	0	0	0	0	0	0	0	0	0	0	69	0	0	0	0	0	0	0	0	0	0	0	0	0	0	0	0	0	0	0	0	0	0
2a1cf7cc2ba21581f65ee17de8e6af21	0	9	0	0	0	0	11	27	0	0	0	0	0	0	0	0	0	0	13	0	0	0	0	24	0	0	29	0	0	0	18	0	248	20	0	0	68	0	22	60	0	0	13	0	0	0	0	0	0
ff332b0627e46e9358cb150784c791a5	0	0	0	0	0	0	0	0	0	0	0	0	25	0	0	0	0	0	0	0	0	0	0	0	0	0	0	0	0	0	0	0	0	0	0	0	0	0	0	0	0	0	0	0	0	0	0	0	0
7802aa607585d9ece9a0a50b3904f036	0	0	9	0	0	0	0	0	0	0	0	0	0	0	0	0	0	0	0	0	0	0	0	0	6	0	0	0	0	0	0	0	0	0	0	0	0	18	0	0	0	0	0	0	0	0	8	0	10
450e03b437205f1be0ff1c74537115a3	0	0	0	135	0	0	0	0	0	0	0	0	0	0	0	0	0	0	0	0	0	0	0	0	0	0	0	0	0	0	0	0	0	0	0	0	0	0	0	0	0	0	0	0	0	0	0	0	0
2d5d0ad131b5a2f41dc930c1917157d7	0	0	0	0	0	0	293	0	0	0	0	0	0	0	0	0	0	0	0	0	0	0	0	0	0	0	0	0	0	0	0	0	0	0	0	0	0	0	0	0	0	0	0	0	0	0	0	0	0
55ba0038fc5944a3b16f53f65429a005	0	30	0	0	23	0	5	0	0	0	14	0	0	0	0	0	0	0	0	0	0	0	0	0	0	0	0	0	0	0	0	0	1011	0	0	0	144	0	0	110	0	0	120	0	0	0	18	0	0
829d18adc8e56a93e68f058eda38d58e	0	0	0	0	0	0	0	0	0	0	0	0	0	0	0	0	0	0	0	0	0	0	0	0	0	0	0	0	0	0	0	0	0	0	0	0	0	0	28	0	0	0	0	0	0	0	0	0	0
ab42e55342044aa3456c784bb42d1858	0	0	0	0	0	0	0	0	0	0	0	0	0	0	0	0	0	0	0	0	0	0	0	0	0	0	0	0	0	0	0	0	0	0	0	0	10	0	0	0	0	0	0	0	0	0	0	0	0
6c94c824c71ba6ccc1d7baaa28b4d0b1	0	0	0	0	0	0	0	0	0	0	0	0	0	0	0	0	0	0	0	29	0	0	0	0	0	0	0	0	0	0	0	0	0	0	0	0	0	0	0	0	0	0	0	0	0	0	0	0	0
ca2f564edd4b851bcfbeb64fab46c97e	0	0	0	0	0	0	825	0	0	0	0	0	0	0	0	0	0	0	0	0	0	0	0	0	0	0	0	0	0	0	0	0	0	0	0	0	0	0	0	0	0	0	0	0	0	0	0	0	0
1a3dd4afbe1f216eae66bd583e33c044	0	0	0	0	0	0	0	0	0	0	0	0	0	0	0	0	0	0	0	0	0	0	0	0	0	0	0	0	497	0	0	0	0	0	0	0	0	0	0	0	0	0	0	0	0	0	0	0	0
7bce87037707b7ba38855fbf92e79e79	0	0	0	0	0	0	0	0	0	0	0	0	0	0	0	0	0	0	0	0	0	0	0	0	0	0	0	0	0	0	0	0	0	0	0	0	0	0	0	0	0	0	50	0	0	0	0	0	0
7d20cde28974b55483bb3def0bdb0897	0	0	0	0	0	0	0	0	0	0	0	29	0	0	0	0	0	0	0	0	0	0	0	0	0	0	0	0	0	0	0	0	0	0	0	0	0	0	0	0	0	0	0	0	0	0	0	0	0
b009480fcb55be054b161bb93cefd4fb	0	53	16	0	67	17	16	86	9	0	11	0	7	0	0	15	23	0	10	78	0	0	19	12	0	0	134	12	0	0	17	0	288	0	0	8	187	13	18	68	8	0	35	13	0	92	0	0	0
81584eaad5027aa2756d72cf46a915fc	0	0	0	0	0	0	0	0	0	0	0	0	0	0	0	0	0	0	0	0	0	0	0	0	0	0	0	0	0	0	0	0	0	0	0	0	0	0	0	0	10	0	0	0	0	0	0	0	0
dcfeda5d856bffaa562e63d052467be1	0	0	102	0	0	468	62	142	0	0	0	112	0	0	56	0	288	249	0	276	0	0	236	106	824	0	0	0	0	107	0	0	0	78	0	0	140	0	0	0	0	0	0	0	44	289	26	0	0
5daf504e6cc132944d7811c384047959	0	0	0	0	0	0	0	0	0	0	0	0	0	0	0	21	0	0	0	0	0	0	0	0	0	0	0	0	0	0	0	0	0	0	0	0	0	0	0	0	0	0	0	0	0	0	0	0	0
f7f77ce98259bbe4915bfd7dd2f4b534	0	0	0	0	9	0	0	0	0	0	0	0	0	0	0	0	0	0	0	0	0	0	0	0	0	0	10	0	0	0	0	0	44	0	0	0	0	0	0	0	0	0	0	0	0	0	0	0	0
bde8fcd25ffcd372df135481e3b70943	379	76	0	0	103	0	73	39	0	0	47	0	0	0	96	0	0	0	19	156	0	12	0	0	0	0	82	0	0	0	50	0	668	0	8	0	205	41	66	133	68	11	372	29	0	51	0	0	0
9f2926c84ad01fa1621a6a0fc1350895	175	40	26	106	22	95	21	28	0	21	19	0	48	0	0	0	0	16	21	17	0	53	0	0	95	0	79	0	137	31	103	18	0	0	67	0	29	0	0	98	0	16	36	0	42	78	24	96	0
9f64904777dcf5723cfdba09b73ed038	0	128	0	18	115	44	0	123	0	0	0	0	0	0	28	0	64	0	0	0	35	17	0	0	60	0	0	0	0	0	0	0	29	4	0	0	0	22	0	7	0	0	0	0	0	30	83	0	110
8d655b792a91f21237c7baaade62a836	0	0	0	0	0	0	0	0	0	0	0	0	0	72	0	0	0	0	128	0	0	0	0	0	0	0	0	0	0	0	0	0	0	0	0	47	0	0	0	0	0	0	0	0	0	0	0	0	0
fe08bc69179469d6dba9a19620568c8d	0	0	0	0	0	0	0	0	0	0	0	0	0	0	0	0	0	0	0	0	0	0	0	0	0	0	0	0	0	12	0	0	0	0	0	0	0	0	0	0	0	0	0	38	0	0	0	0	0
422adb3edaf73501030453cf8ac8be3c	0	0	0	0	0	0	0	0	0	0	0	0	0	0	0	0	0	0	0	0	0	0	0	0	0	0	0	0	10	0	0	0	0	0	0	0	0	0	0	0	0	0	0	0	0	0	0	0	0
b2c505c23f262990291476a321506e76	0	26	0	0	0	0	0	0	0	0	0	0	0	0	0	0	0	0	0	0	0	0	0	0	0	0	0	0	0	0	0	0	0	0	0	0	0	0	0	0	0	0	0	0	0	0	0	0	0
ab914a25aff294fbb523177653f729f1	0	40	0	0	44	0	0	0	0	0	0	0	0	0	0	0	0	0	0	0	0	0	0	0	0	0	0	0	0	0	0	0	0	0	0	0	0	0	0	0	0	0	0	0	0	0	0	0	0
e11c871ffa0128d9dc8ce2e6087f549a	0	0	0	0	0	0	0	0	0	0	0	0	0	0	0	0	0	0	0	0	0	0	0	0	0	0	0	0	0	0	0	0	0	0	0	0	0	0	0	0	0	0	0	0	0	0	0	0	0
d445976f9fbde1b5b4fd01416784e181	0	0	1209	28	0	20	0	0	23	0	0	0	0	0	12	0	0	0	14	0	0	34	22	11	46	0	78	0	0	0	34	24	0	64	6	0	20	0	5	14	0	18	0	16	9	0	0	10	0
1fcd2fb4f4da8d5889cf64984be64af7	0	0	0	0	0	0	0	0	0	0	0	0	0	0	0	0	0	0	0	0	0	0	0	0	0	0	0	0	0	0	0	0	0	0	0	0	0	0	0	0	0	137	0	0	0	0	0	0	0
9402110f20c76af8ea5cf03dfce41dc8	1155	101	210	82	95	81	172	160	866	0	202	92	0	375	0	999	0	1175	907	298	0	41	8588	157	1427	390	64	0	49	2551	67	397	68	3410	0	343	391	79	102	540	135	2300	0	145	796	1578	215	223	72
d4f8c6be4437909cf94521a27d3c2821	0	0	0	27	29	36	0	49	64	19	0	0	0	33	29	0	19	0	27	61	0	36	26	21	70	0	86	0	0	0	90	0	0	47	18	0	38	20	0	110	16	21	17	88	23	135	43	0	85
4e9992e0e71ae259609e20cfa03cbc90	0	0	0	0	0	0	0	0	0	0	0	0	0	0	0	0	115	0	0	0	0	0	0	0	0	0	0	0	0	0	0	0	0	0	0	0	0	0	0	0	0	0	0	0	0	0	0	0	0
cef1f3eb6f556da901864d6a993deda2	0	0	0	0	0	0	0	0	0	0	0	0	0	0	23	0	0	0	0	0	0	0	0	0	0	0	0	0	0	0	0	0	0	0	0	0	0	0	0	0	0	0	0	0	0	0	0	0	0
7f1a18b9ab3ed3eec52b90536bd614e0	0	0	0	0	15	0	0	0	0	0	0	0	0	0	0	0	0	0	0	0	0	0	0	0	0	0	0	0	0	0	0	0	0	0	0	0	0	0	0	0	0	0	0	0	0	0	0	0	0
e521e68b96871a5949ba9b870177ccba	0	350	32	6	406	23	174	150	0	14	29	182	105	8	3	3	88	125	26	7	10	2	144	83	91	6	381	0	12	23	408	54	5	86	33	0	69	16	7	61	0	88	4	32	76	37	71	4	0
d118eb47ac44d1ff7efaca0d9e6dba37	0	0	0	0	0	0	0	0	0	0	0	0	0	0	0	0	0	0	0	0	0	0	0	0	0	0	0	0	0	0	0	12	0	0	0	0	0	0	0	0	0	0	0	0	0	0	0	0	0
74e83e216d8c3657afcb9a1792c37dd3	0	0	0	0	0	0	0	0	0	0	0	0	0	0	0	0	0	0	0	0	0	0	0	0	0	0	0	0	0	0	0	0	34	0	0	0	20	0	0	0	0	0	0	0	0	0	0	0	0
3538e5e6e63f7bc46643117bcc025313	0	0	104	0	0	0	0	0	0	0	0	0	0	0	0	0	0	0	0	0	0	0	0	0	0	0	0	0	0	0	0	0	0	0	0	0	0	0	0	0	0	0	0	0	0	0	0	0	0
c7db34fe8b21419a3a524ea5a5542a0d	18	0	14	0	0	0	0	0	0	0	0	0	15	17	16	0	0	0	0	0	0	14	0	0	0	14	0	0	0	0	0	0	0	0	0	0	0	15	12	0	10	0	0	0	0	0	0	9	0
36518a8870458bb4bdf98e0a29c8d218	0	0	0	0	0	0	0	0	0	0	0	0	0	0	0	0	0	0	0	0	0	0	0	0	0	0	0	0	0	0	0	0	0	0	0	0	0	0	0	0	0	0	0	0	0	37	0	0	0
6e1d9cdd2679d6a4fa11c2212ca79a2b	0	0	0	0	0	0	0	0	0	0	51	0	0	0	0	0	0	0	0	0	0	0	0	0	16	0	0	0	0	0	0	0	0	0	0	0	0	0	0	0	0	0	0	0	0	0	0	0	0
ab6711ecb413c8ffba68eb645b564e40	0	0	0	0	0	0	0	0	0	0	0	0	0	0	43	0	0	0	0	0	0	0	0	0	0	0	0	0	0	0	0	0	0	0	0	0	0	0	0	0	0	0	0	0	0	0	0	0	0
92c93f686c817f77014841fee47581e0	0	0	0	0	0	0	0	0	0	0	0	0	0	0	0	0	0	0	0	0	0	0	0	0	0	0	67	0	0	0	0	0	0	0	0	0	0	0	0	0	0	0	0	0	0	0	0	0	0
21f9cde716832211910a36cde60683ab	0	0	0	0	0	0	0	0	0	0	0	0	0	0	0	0	0	0	0	0	0	0	0	0	0	0	0	0	0	0	0	0	0	0	0	0	0	0	0	0	0	0	0	0	0	0	0	0	0
668444c80d05ab8eb738b13b2c0cd940	0	0	0	0	0	0	0	0	0	0	0	0	0	0	0	0	0	27	0	0	0	0	0	0	0	0	0	0	0	0	0	0	0	0	0	0	0	0	0	0	0	0	0	0	0	0	0	0	0
a7834b071b8051eb7add84cdd253f263	0	0	0	0	0	0	0	0	0	0	0	0	578	0	0	0	0	0	0	0	0	0	0	0	0	0	0	0	0	0	0	0	2187	0	0	0	0	0	0	0	0	0	0	0	0	0	0	0	0
ddb061458d48d9247449dc5bcbbac18f	0	0	0	0	0	0	0	0	0	0	0	0	0	0	0	0	0	0	0	0	0	0	0	0	0	0	0	0	0	0	0	0	0	0	0	0	72	0	0	0	0	0	0	0	0	0	0	0	0
a13a757412aa49430a48149867e1fe7f	106	0	0	0	0	0	23	0	0	0	0	0	0	0	0	26	0	0	0	0	0	0	33	0	359	0	0	0	0	0	0	0	0	0	0	430	0	0	0	0	0	1388	0	0	512	0	0	0	0
dab215916e5aa1b4cb96b5d63e29a791	0	0	0	0	0	0	0	0	0	0	0	0	0	0	0	0	0	0	0	0	0	0	0	0	0	0	0	0	0	0	11	0	0	0	0	0	0	0	0	0	0	0	0	0	0	0	0	0	0
e711b59995d43d5564901a30c391e31d	0	0	0	0	0	0	0	0	0	0	0	0	0	22	0	0	0	0	0	0	0	0	0	0	0	24	0	0	180	0	0	0	0	0	47	0	0	0	8	0	0	97	0	0	153	0	0	0	0
09bad6ef33509e42e9bdc2b95fda1f10	86	1909	0	705	1693	350	2547	0	539	111	798	0	1037	0	1361	623	1552	290	312	971	167	494	300	416	1817	0	706	97	613	509	1055	549	0	732	393	1397	4012	124	561	1833	127	863	328	0	726	72	395	861	0
b43f82522a0058d5deba3dfe65b0b26d	0	0	0	0	0	0	0	0	0	0	0	0	0	0	0	0	0	0	0	0	0	0	0	0	0	0	11	0	0	0	0	0	0	0	0	0	0	0	0	0	0	0	0	0	0	0	0	0	0
fdf40c2b0e747b86f233c3993910734d	0	0	14	0	0	0	0	0	0	0	0	0	0	0	0	0	0	0	0	0	0	0	0	0	0	0	0	0	0	0	0	0	0	0	0	0	0	0	0	0	0	0	0	0	0	0	0	0	0
b84e59b6ee7c220f334e48a872bab158	0	0	0	58	0	0	25	0	0	0	0	0	195	0	0	0	50	0	0	40	109	133	0	0	0	0	0	0	0	53	0	27	0	0	0	0	0	160	0	0	0	0	0	64	0	0	29	182	0
d6349d1300585f23eddcb733a6e16091	0	0	0	0	0	17	0	0	0	0	0	0	0	0	112	0	18	0	0	0	0	0	0	57	0	0	0	0	0	0	0	0	0	0	0	0	0	0	0	0	0	0	0	0	0	0	0	0	0
0f5ea9e7198b8ee24d719ca531cd139e	109	21	50	46	20	75	0	0	23	0	76	0	18	0	55	259	55	0	307	95	0	0	68	44	0	0	37	95	0	126	36	64	351	52	0	55	167	94	0	104	91	50	0	112	35	0	71	39	0
081fa96ee4f52b0b9a9a8e74415166ea	0	0	0	0	0	0	0	0	0	0	0	0	0	0	0	0	0	0	0	0	0	0	0	0	0	0	0	0	0	0	0	0	0	0	0	0	0	0	0	0	0	0	0	0	0	0	16	0	0
876252d0cbab0a914a0cb8d4d3937e77	0	420	0	0	558	0	0	0	0	0	0	415	0	0	0	0	0	0	0	0	0	0	0	0	0	0	0	0	0	73	0	433	0	0	0	0	0	0	129	240	0	66	59	0	29	663	0	0	0
5c997b4b7b1df05322a689b1d556122d	0	0	0	0	0	0	0	30	0	19	0	0	0	0	73	0	40	0	39	185	66	0	47	39	0	0	0	0	61	0	0	0	0	54	0	0	0	0	0	0	0	0	0	0	0	0	0	0	175
846df988d1d564d756f422885c003d80	0	0	0	0	0	0	0	0	0	0	0	0	0	0	0	0	0	0	0	0	0	0	0	0	0	0	0	0	0	0	0	0	177	0	0	0	0	0	0	0	0	0	0	0	0	0	0	0	0
123b926e9af60817e02c6d9c932dede5	0	0	0	0	0	0	0	0	0	0	0	0	0	0	0	0	0	0	0	0	0	0	28	0	0	0	0	0	0	0	0	0	0	93	0	21	0	25	0	0	28	0	0	0	0	0	0	0	47
e04f41112531ea1d290ce21499f24230	0	0	0	0	0	0	0	0	0	0	0	0	0	0	0	0	0	0	0	0	0	0	0	0	0	0	0	0	0	0	0	0	0	0	0	0	0	0	0	0	0	0	0	0	0	0	0	0	0
8256b7c98497a152326382d59cfc6466	0	0	0	0	0	0	0	0	0	0	0	0	0	0	97	0	0	0	0	0	0	0	0	0	0	0	0	0	0	0	0	0	0	0	0	0	0	0	0	0	0	0	0	0	0	0	0	0	0
347f8631cb91298b38250a5c8ae1edd2	0	0	0	0	0	0	0	0	0	63	0	0	0	0	0	0	110	0	0	0	0	0	0	0	0	0	0	0	176	0	0	0	0	0	102	0	0	0	0	0	0	0	0	0	0	0	0	0	0
fb9b5e7262f1ef98291d6fe55f0d29bd	0	0	0	0	0	0	0	0	0	0	0	0	0	0	0	0	0	0	0	0	0	0	0	0	0	0	0	38	0	0	0	0	0	0	0	0	0	0	0	0	0	0	0	10	0	0	0	0	0
63b8937ae777db4fa14ad65964a523fd	0	0	0	0	0	0	0	0	0	0	0	0	0	0	0	0	0	0	0	0	0	0	0	0	0	0	0	0	0	0	0	0	0	0	0	0	0	0	0	0	0	0	0	0	0	0	0	0	0
9b42d60b0fe37d98c95da54883a96291	127	89	85	93	114	203	22	136	558	86	100	48	799	373	791	443	269	15	270	377	195	67	2173	98	135	353	123	535	212	15	134	42	48	363	172	135	177	1234	32	424	1133	43	16	290	17	431	196	24	403
3079fda7f0e2a295144953e1e309a558	0	0	0	0	0	0	0	0	0	0	0	0	0	0	0	0	0	0	0	0	0	14	0	0	0	0	0	0	0	0	0	0	0	0	0	0	0	0	0	0	0	0	0	0	0	0	0	0	0
65737de007d710946681cfe642668347	0	0	345	0	0	0	0	74	156	0	0	0	145	126	611	0	55	0	0	0	69	0	0	0	0	105	0	25	0	0	0	0	17	87	0	114	83	0	0	0	0	0	0	85	0	48	0	0	175
d771d8b43c8f7e74ef734413bee6f880	0	0	0	0	0	0	0	0	0	0	0	0	0	0	0	0	0	0	0	0	0	0	0	0	0	0	0	0	0	0	0	0	0	0	0	0	0	0	0	0	0	0	0	0	0	474	0	0	0
4c4ca1aa11f9f40243c9bdfcff4d729f	0	0	0	0	0	0	0	0	0	0	0	0	0	0	0	0	0	0	0	0	0	0	0	0	0	0	0	0	0	0	17	0	0	10	0	0	0	0	0	0	0	0	0	0	0	0	0	0	0
75ac0574b76308f616486241d946d44a	0	477	0	108	558	0	0	136	0	65	143	0	0	0	44	0	374	56	0	0	0	118	168	112	0	0	0	0	0	144	228	77	0	74	110	224	115	0	202	0	0	0	0	0	0	397	0	0	0
62cbec975c103d00e1326f249117bbbd	0	0	0	0	0	0	0	0	0	0	0	0	0	0	0	0	0	0	28	0	0	0	0	0	0	0	0	0	0	0	0	0	0	0	0	0	0	0	0	0	0	0	0	0	0	0	0	0	0
49beaed69b016c01397e5fe491b12d02	62	3056	498	1139	3729	361	292	3420	49	1514	680	307	61	2537	93	543	1794	464	237	269	754	792	513	793	1066	1601	1346	0	5733	874	1353	262	85	133	2489	131	3348	158	286	1898	107	531	944	0	518	8168	104	400	52
2efc6b128d9bfc84c44645478455e455	0	0	0	0	0	0	0	0	0	0	0	0	0	0	0	0	17	0	0	0	0	0	0	0	0	0	0	0	0	0	0	0	0	0	0	0	0	0	0	0	0	0	0	0	0	0	0	0	0
0c2d08ae0a6afa238519fd27fa9baf03	0	0	0	0	0	0	0	0	0	0	0	0	0	0	0	0	0	0	0	0	0	0	0	0	0	0	0	0	0	0	0	0	0	0	0	0	0	0	0	0	0	0	0	0	0	0	0	0	0
d178240c147cc40f9c80e3a0b3ff9a1f	0	0	0	0	0	0	0	0	0	0	0	0	0	0	0	0	0	0	0	108	0	0	0	0	0	0	0	0	0	0	0	0	0	0	0	0	0	0	0	0	0	0	0	0	0	0	0	0	0
27113d7f87a369c277ff6a4421506ecb	0	0	0	0	0	0	0	0	0	0	0	0	0	0	0	0	0	0	0	0	0	0	0	0	0	0	0	0	0	0	0	0	0	0	0	0	0	0	0	0	0	0	0	0	0	0	0	0	0
7876a807ce2cd96fe806e6c4a132eec3	0	0	0	0	0	0	0	0	0	0	0	0	0	0	0	0	0	0	0	0	0	0	0	0	0	0	0	0	0	0	0	0	0	0	0	0	0	66	0	0	59	0	0	0	0	0	0	0	0
73554e0f4c525b664c9ee9bfce658ef7	0	0	0	0	0	0	0	0	0	0	0	0	0	0	0	0	0	0	0	73	0	0	0	0	0	0	0	0	0	0	0	0	0	0	0	0	0	0	0	0	0	0	0	0	0	0	0	0	0
6470a95c5b8eb17372e562b04c4ae4dd	0	245	31	0	242	17	0	494	27	0	0	6	0	0	0	0	117	0	0	197	0	0	26	199	0	0	244	56	0	0	23	0	323	388	0	0	92	0	0	39	54	0	0	444	0	0	8	0	0
eebb52f42d6873da654982c66737bd96	0	0	0	0	0	0	0	0	0	0	0	0	0	0	0	47	0	0	0	0	0	0	0	0	0	0	0	0	0	0	0	0	0	0	0	0	0	0	0	0	0	0	0	0	0	0	0	0	0
49567ded9f1943384cbe8e58b96f8128	0	0	0	0	0	0	0	25	0	0	0	28	0	0	0	0	0	0	0	0	0	0	0	0	0	0	0	0	0	0	0	0	0	0	0	0	0	0	0	0	0	0	0	0	0	0	0	0	0
96a8560eccae49f7dcefc452073c0a01	0	0	0	0	160	0	0	125	0	0	0	0	0	0	0	0	0	0	0	0	0	0	0	0	0	0	0	167	0	0	0	0	453	0	0	0	0	0	0	0	0	0	0	0	0	0	0	0	0
4b2dc03743488a0a43ccc6d480139a28	0	0	0	0	0	0	0	0	0	0	0	0	0	0	0	0	0	0	0	0	0	0	0	0	0	0	0	0	0	0	0	0	0	0	0	0	0	0	0	0	0	0	0	0	25	0	0	0	0
5a484a6201ad91c94d3dbe12010e6cf1	0	0	0	0	0	0	0	0	0	0	0	0	0	0	0	0	0	0	0	0	0	0	0	0	0	0	0	0	0	0	0	0	0	0	0	0	0	0	0	0	0	0	0	0	0	0	0	0	0
7d0e71be4b17df460fb188040cbf6ca3	0	0	0	0	0	0	0	0	0	0	0	0	0	0	0	0	0	0	0	0	0	0	0	0	0	0	0	0	0	0	0	0	0	0	0	0	0	0	0	0	0	0	0	0	0	0	0	0	0
c9cf1f20cb854515fccaf46dff15c386	0	0	0	0	0	0	0	0	0	0	0	0	0	0	0	0	0	0	0	12	0	0	0	0	0	0	0	0	0	0	0	0	0	0	0	0	0	0	0	0	0	0	0	0	0	0	0	0	0
b37bb0fa024b1304ee1b09f489895031	0	0	0	649	0	0	0	0	0	0	780	0	110	0	0	32	0	55	0	0	0	397	59	0	0	0	1887	0	0	90	1256	0	19	0	0	0	0	0	0	379	0	0	144	0	0	0	0	0	0
d78ac7a9ac5e4b1d31434ba77b60a6df	0	0	0	0	0	0	0	0	0	0	0	0	0	0	0	0	0	0	0	0	0	0	0	0	0	0	0	0	0	0	0	0	0	0	0	0	0	0	0	0	0	0	0	0	0	0	0	0	0
de3413b039d56f35c73c7b5fe25d97ef	0	0	0	0	0	0	0	0	0	0	0	0	0	0	0	0	0	0	0	0	0	0	0	0	0	0	0	0	0	0	0	0	0	0	0	0	0	0	0	0	0	0	0	0	0	0	0	0	0
47d2f0adc9e8063c45ed211dfd73fd63	276	0	217	179	0	299	115	0	313	322	206	0	141	274	593	282	438	495	385	361	280	185	0	409	0	249	0	434	0	156	0	142	0	576	0	195	0	345	242	0	440	313	0	306	360	0	280	202	257
14619dbc39e86708303a57aa1cc7bb65	0	10	0	0	17	0	0	0	0	0	0	0	0	0	0	0	0	0	0	0	0	0	0	0	0	0	0	0	0	0	0	0	19	55	0	0	0	0	0	0	0	0	0	0	0	0	0	0	0
653e9c8c56e8cd9385fa3e017e8a6f1f	23	0	128	148	0	23	22	0	11	11	22	0	107	119	18	21	138	12	11	29	72	98	0	23	0	22	0	142	0	135	0	10	0	11	0	19	0	107	110	0	30	18	0	142	16	0	32	115	13
9a7fa20aa9cb15acfff367f253ccf6b8	85	91	122	273	100	109	0	67	155	0	141	0	0	486	174	0	0	0	385	0	0	238	0	0	93	155	403	0	76	176	486	89	91	0	0	122	1201	59	0	605	82	213	0	212	181	0	0	130	0
43a63614edd1221f2e8c89d9bd8398d8	0	0	0	0	0	0	0	0	0	0	0	0	0	0	0	0	0	0	0	0	0	0	0	0	0	0	0	0	0	0	0	0	0	0	0	0	0	0	0	0	0	0	0	0	14	0	0	0	0
4028edca615e9667a836e629f435e156	0	0	0	0	0	0	0	0	0	0	0	0	0	0	0	0	0	0	0	0	0	0	0	0	0	16	0	0	0	0	0	0	0	0	0	0	0	0	0	0	0	0	0	0	0	0	0	0	0
2212551221860921ec5f2ca720fa5eb0	0	0	0	0	0	0	0	0	0	0	0	0	0	0	0	0	0	0	0	0	0	0	0	0	0	0	0	0	0	0	0	0	0	0	0	0	0	0	0	0	0	0	0	0	0	0	0	0	0
2bae5407b35f47b9e375b71f3466a1ef	0	0	0	0	0	0	0	0	0	0	0	0	0	0	0	23	0	0	0	0	0	0	0	0	0	0	0	0	0	0	0	0	0	0	0	0	0	0	0	0	0	0	0	0	0	0	0	0	0
9ff9da0d125f3e3f4383051c5b8ea4cb	0	0	0	0	0	0	0	0	0	0	15	95	0	0	0	0	0	0	0	0	0	0	0	0	0	0	0	0	0	0	0	0	0	0	0	0	0	0	0	0	0	0	0	0	0	16	0	0	0
d21c7d738702ab5bfeef5499294cfc5a	23	15	0	20	25	0	0	0	0	0	0	0	0	0	30	0	0	0	0	0	0	0	0	0	43	0	89	0	89	0	0	0	0	0	0	0	53	0	0	47	0	0	0	0	0	0	0	26	0
7547e9ea969b6df21925d5e942f431f3	0	0	0	0	5	0	0	0	0	0	0	0	0	0	0	0	0	0	0	0	0	0	0	0	0	0	0	0	0	0	4	0	40	0	0	0	21	0	0	0	0	0	61	0	0	31	0	0	0
65f3cb76367be75c79480323ffb4e14f	0	0	0	0	0	0	0	0	0	0	0	0	0	0	0	0	0	0	0	0	0	0	0	0	0	0	0	0	0	0	0	0	0	0	0	0	0	0	0	0	0	0	0	0	0	0	0	0	0
56e449e085cc699b9d8cc3012901e873	0	0	17	0	0	0	0	14	0	0	0	0	0	0	0	0	0	0	0	0	0	0	0	0	0	13	0	0	0	0	0	0	0	0	0	0	21	0	0	0	0	0	0	67	0	7	0	0	0
c2f27178e2e51491f2b517ee097bd483	0	0	0	0	0	0	0	0	0	0	0	0	0	0	0	0	0	0	0	0	0	0	0	0	0	0	0	0	0	0	0	0	0	0	0	0	0	0	0	0	0	0	0	0	0	0	0	0	0
32fc5beef4a2f380244debe4a91e4176	0	0	0	0	0	0	0	0	0	0	0	0	41	0	0	0	0	0	0	0	0	0	0	0	0	0	0	0	0	0	0	0	0	0	0	0	0	0	0	0	0	0	0	0	0	0	0	0	0
cb5075d2734c039225ce519442b473c3	0	0	0	0	0	0	0	0	0	0	0	0	0	0	0	0	0	0	0	0	0	0	0	0	0	0	0	0	0	0	0	0	0	0	0	0	0	0	0	0	0	0	0	0	0	0	0	0	0
e3f68e22dadf58189566e24b21c979b0	0	0	0	0	0	0	0	0	0	0	0	0	0	0	0	0	0	0	0	0	0	0	36	0	0	0	0	28	0	0	0	0	0	0	0	0	0	0	0	0	0	0	0	0	0	0	0	0	0
e6bd8668b7a33763ff8e3107154537c8	0	0	0	0	0	0	0	0	0	0	0	0	0	0	0	0	0	0	0	0	0	0	0	0	0	0	0	0	0	0	0	0	36	0	0	0	0	0	0	0	0	0	0	0	0	0	0	0	0
f9bdbb438f58bafb695b4bae652253b7	0	0	0	0	0	0	0	0	0	0	0	0	0	0	0	0	0	0	0	0	143	0	0	0	0	0	0	0	0	0	0	0	0	0	0	0	0	0	0	0	0	0	0	0	0	0	0	0	0
1411db298ba75e91d3b131345c2ce253	0	0	0	0	0	0	0	0	0	0	0	0	0	0	0	0	0	0	0	0	0	0	0	0	0	0	0	0	27	0	0	0	0	0	0	0	0	0	0	0	0	0	0	0	0	0	0	0	0
fbf999b9be29066592cca199454ccbca	0	47	0	0	59	0	27	38	0	0	50	0	28	127	34	26	35	0	0	0	0	0	0	0	32	66	0	21	0	0	0	0	0	0	0	180	20	0	0	0	0	0	0	0	0	13	0	0	0
4fb24830f3a1b52d648997e100a17357	0	0	0	0	0	0	0	0	0	0	0	0	0	0	0	0	0	0	0	0	0	0	0	0	0	0	0	0	0	0	0	0	0	0	0	0	0	0	0	26	0	0	0	0	0	0	0	0	0
d3ac81b6ba122950da207b398bd8e687	0	0	0	0	0	0	0	0	0	0	0	0	0	0	0	0	0	0	0	0	0	0	0	0	0	0	0	0	0	0	0	0	0	0	0	0	0	0	0	0	0	0	0	79	0	0	0	0	0
6eb179dfb479d3cd27f798508e52c4f9	0	0	0	0	0	0	0	0	0	0	0	0	0	0	0	0	0	0	0	0	0	0	0	0	0	0	0	0	0	0	0	0	0	0	0	0	0	0	0	43	0	0	0	0	0	0	0	0	0
7717ae26f40dc624c2b9c83b45919797	0	0	0	0	0	0	0	0	0	0	0	0	0	0	0	0	0	0	0	0	0	0	0	0	0	0	0	0	0	0	0	0	0	0	0	0	0	0	0	86	0	0	0	0	0	0	0	0	0
e4039ffed291901d1a834cd3bb80afb8	66	128	0	0	69	0	0	0	0	0	0	0	0	0	17	0	0	0	0	0	0	0	0	0	0	0	25	31	0	0	22	15	874	0	0	0	363	0	0	139	22	0	0	0	0	0	0	0	0
7f5adfd5aa5f646a562649261a89c187	0	0	0	0	0	0	0	0	0	0	0	0	0	0	0	0	0	0	0	0	0	0	0	0	0	0	0	0	0	0	0	0	0	0	0	0	0	0	0	0	0	0	0	0	0	0	0	0	0
95ad619b5d11b9ecf62ab5173bb7ed0b	0	0	0	0	0	0	0	0	0	0	0	0	0	0	0	0	0	0	0	0	37	0	0	0	0	0	0	0	0	0	0	0	0	0	0	0	0	0	0	0	0	0	0	0	0	0	0	0	0
48bda6d8bad6ee69236ddd053abb07ff	0	0	0	0	0	0	0	6	0	5	0	0	0	0	0	0	0	0	0	0	0	0	0	0	57	0	0	0	0	0	0	0	0	0	5	0	0	0	0	0	0	0	0	0	0	0	0	0	0
56e201a4eed635b3c8f07ce338c4e7f9	0	0	0	0	0	0	0	0	0	0	0	0	0	0	0	0	0	0	0	0	0	0	0	0	0	0	0	0	0	0	0	0	0	0	0	0	0	0	0	0	0	0	0	0	0	0	0	0	0
9a1792497731b6c2949e84076ab7cf37	0	0	0	0	0	0	0	0	0	0	0	0	0	0	0	25	0	0	0	0	0	0	0	0	0	11	0	0	0	0	0	0	572	0	0	0	0	0	0	0	0	0	0	0	0	0	0	0	0
62d7d6efddb64da284ea568661429532	0	0	12	0	0	0	0	0	0	0	0	0	0	0	0	0	0	0	0	22	0	0	0	0	0	0	0	0	0	0	0	0	0	0	0	0	0	30	0	0	36	0	0	0	0	0	0	0	0
7924f15bab7b3f3fbbedcf8bad7f79e5	0	0	11	8	0	143	0	0	5	0	0	0	5	0	0	7	0	0	16	14	0	0	0	14	19	0	0	0	0	0	0	6	0	21	0	0	0	0	0	0	4	0	0	0	0	29	8	0	0
c016f17bb6a26a1a276b73cd6ec2f2ff	0	0	0	0	0	0	0	0	0	0	0	0	0	0	0	0	0	0	0	0	0	0	0	0	0	0	0	0	0	0	0	14	0	0	0	0	0	0	0	0	0	0	0	0	0	0	0	0	0
9a203d19e285a90637fea383470c7b71	0	0	0	0	0	0	0	0	0	0	0	0	0	0	0	0	0	0	0	0	0	0	92	0	0	0	0	0	0	0	0	0	0	0	0	0	0	0	0	0	0	0	0	0	0	0	0	0	0
7f48107e8b267e1797308ba1608fdbba	0	0	0	0	0	0	0	0	0	0	0	0	0	0	0	0	0	0	0	0	0	0	0	0	0	0	0	0	0	0	0	0	0	0	40	0	0	0	0	0	0	0	0	0	0	0	0	0	0
a47eb9d0b8ad141b8c037856eb993a6a	0	0	0	0	0	0	0	0	0	0	0	0	0	0	0	0	119	0	0	0	0	0	0	0	0	0	0	0	0	0	0	0	0	0	0	0	0	0	0	0	0	0	0	0	0	0	0	0	0
c4a3ddf1fccd21dba3b6f9c51c531958	0	0	0	0	0	0	0	0	0	0	77	0	0	31	0	35	0	0	0	0	0	0	0	0	0	32	0	0	0	0	0	70	0	0	0	0	0	0	0	0	0	0	0	0	0	0	0	0	0
99b26cf7311ab3f2500d249e45d9d468	21	0	0	0	0	0	0	0	0	0	0	0	0	0	0	0	0	0	0	0	0	0	0	0	0	0	0	0	0	0	0	25	0	0	0	0	0	0	0	0	0	0	0	0	0	0	0	11	0
76c2116fe34cf5b5abf053843c6c0c65	0	1204	70	695	1171	265	119	1401	0	369	744	611	174	354	0	225	1069	617	450	300	618	642	241	1546	784	335	2029	0	1152	884	2033	244	0	55	732	144	1010	95	228	502	38	319	167	51	144	217	0	316	30
9e5a3e61aa64d82941e6ca5bd9cb12b1	0	0	0	0	0	0	0	0	0	0	0	0	0	0	0	0	0	0	0	0	0	0	0	18	0	0	0	0	0	0	0	0	0	0	0	0	0	0	0	0	0	0	0	0	0	0	0	0	0
de7378442387e3dd9ba8a4b94628ba83	0	0	0	0	0	0	0	0	0	0	0	0	0	0	0	0	0	0	0	0	0	0	0	0	0	0	0	0	0	0	0	0	0	0	0	0	0	0	0	0	0	0	0	0	0	0	0	0	0
e04243e304e9f2989f8f1b50369757f1	552	0	0	0	0	0	600	0	0	0	0	0	0	0	0	426	0	0	0	0	0	0	0	0	0	0	0	0	0	0	0	0	0	0	0	0	0	0	0	0	0	0	0	0	0	0	0	43	0
861834fa214979e61e9d11a9f8aac0b8	62	0	0	0	0	0	0	0	0	0	0	0	0	283	0	0	0	0	61	0	0	0	0	0	0	162	0	0	0	18	0	0	0	0	0	0	72	0	0	49	0	143	54	0	235	29	0	0	0
8a5f323f8c9e911e44db524958f8bfcd	557	1120	681	203	1334	1217	0	803	558	291	575	0	771	846	224	881	2631	121	398	210	0	190	1445	381	0	1023	1262	262	985	105	535	326	123	1849	705	126	890	806	524	1253	947	780	89	250	921	770	557	1755	661
35658fa2959fdac11f2548ad1d6a71b8	0	37	0	0	0	0	0	0	0	0	0	0	0	0	0	0	0	0	0	0	0	0	0	0	0	0	0	0	0	0	0	0	0	0	0	0	0	0	0	0	0	0	0	0	0	0	0	0	0
6de1708d84623b7f4e59788c3a2294bc	43	57	0	98	91	33	20	108	62	28	420	0	0	23	0	6	0	181	674	64	0	90	20	16	0	19	56	0	360	138	90	0	396	0	57	43	627	0	51	935	0	140	6	0	64	159	0	36	0
826511170a0384b8b93cc10e07195492	0	0	0	0	0	0	0	0	0	0	0	0	0	0	0	0	0	0	0	0	0	0	0	0	3975	0	0	0	0	0	0	1662	0	0	0	0	0	0	0	0	0	0	0	0	0	0	0	0	0
06550d071f5a57d519176b514fe669d9	0	0	0	0	0	0	0	0	0	0	0	0	0	0	0	0	0	0	0	0	0	0	0	0	0	0	0	0	0	0	0	0	0	0	0	0	0	0	0	19	0	0	0	0	0	0	0	0	0
6634d6b6dfba4b44a6ed0a69c5d823c0	0	0	0	0	0	0	0	0	0	0	0	0	0	0	0	0	0	0	0	0	0	0	0	0	0	0	0	0	0	0	0	0	0	0	0	0	0	0	0	0	0	0	0	0	0	0	0	0	0
34d60f37fddb2a3c1e5a86a326c1ddfe	0	0	0	0	0	0	0	0	0	0	0	0	0	0	0	0	0	0	0	0	0	0	0	0	0	0	0	0	0	0	0	0	0	0	0	0	0	0	0	0	0	0	0	0	0	0	0	0	0
efe8a2c9ae7e8c03e17c0ef8b43ee9ef	0	0	0	0	0	0	0	0	0	0	0	0	0	0	0	0	0	0	0	0	0	0	0	0	30	0	0	0	0	0	0	0	0	0	0	0	0	0	0	0	0	0	0	0	0	0	0	0	0
253231df18ffafbb5bc972087586e55b	109	0	133	136	0	35	28	108	0	136	197	85	0	55	0	780	0	281	646	6466	0	107	1118	311	323	71	30	0	369	59	17	91	1013	0	381	55	124	57	73	554	45	1180	26	0	665	3081	0	34	0
63316672a155dc63278ad302d8761d50	0	0	0	0	0	0	0	0	0	0	0	0	0	0	192	0	0	0	0	0	0	0	0	0	0	0	0	0	0	0	0	0	0	0	0	0	0	0	0	0	0	0	0	0	0	0	0	0	0
519b6c54592dbc28a24ce97433a3484d	0	0	41	58	0	0	48	136	0	0	0	0	0	0	76	0	0	0	117	0	0	52	0	0	198	0	0	0	0	60	0	0	0	63	0	0	1022	0	0	85	0	0	89	0	0	1811	55	42	0
3bbceb30836aee05b983884ec9630f06	0	0	0	14	0	0	0	0	0	0	10	10	0	0	0	0	0	0	6	10	0	0	0	0	31	0	14	0	17	19	0	0	0	0	7	0	27	12	0	41	0	0	0	0	0	62	18	24	0
5223cf98c515af88c2ab5bfc44e04c46	0	74	0	0	96	7	0	0	0	0	0	99	11	55	0	0	41	24	0	0	41	0	0	10	16	31	0	0	0	0	0	0	0	0	0	0	39	0	15	34	0	19	0	0	10	32	0	0	0
deddf2322d3c75a858bd812e1e6d31a2	0	0	0	0	0	0	0	0	0	0	0	0	0	0	15	0	0	0	0	0	0	0	0	0	0	0	0	0	0	0	0	0	0	0	0	0	0	0	0	0	0	0	0	0	0	0	0	0	0
8dd07a6420c41eb1d7605f96143c79bf	0	0	0	0	0	0	0	0	0	0	0	0	0	0	0	0	0	0	0	0	0	0	0	0	15	0	0	0	10	0	0	0	0	0	6	0	0	0	0	0	0	0	0	0	0	0	0	0	0
d67f1628fa033df0211438943d249370	0	0	0	65	0	0	0	0	0	0	0	0	0	0	0	0	0	0	0	0	0	0	0	0	0	0	0	0	0	0	0	0	0	0	0	0	0	0	0	0	0	0	0	0	0	0	0	0	0
be0029f082be1478fa4172e5199c9d02	0	0	0	0	0	0	0	0	0	0	0	0	0	0	0	0	0	0	0	0	0	0	0	0	0	0	0	0	0	0	0	0	0	0	0	0	0	0	0	0	0	0	0	28	0	0	0	0	0
439726578e113a6b59641de0091c8f43	0	0	7	0	0	26	0	0	0	0	0	0	0	0	0	0	9	0	0	11	0	0	10	9	0	0	0	11	0	0	0	0	0	0	0	0	0	10	5	0	4	0	0	0	0	0	0	0	3
b85bd052fb5dfeb9e2eb5856aecba392	1006	389	4573	549	394	727	0	444	131	69	110	1090	449	57	474	162	133	159	231	524	221	360	381	133	31	29	582	887	280	192	800	181	2858	616	110	69	1499	1643	120	1051	2148	784	137	817	656	2207	1117	186	4292
f2261284533f7756f06b4a1a94358a7d	0	0	0	0	0	0	0	0	0	0	0	0	0	0	0	0	0	0	0	0	0	0	0	0	0	0	0	0	0	0	0	0	0	0	0	0	0	0	0	0	0	0	0	0	0	0	0	0	0
65af4d5febc93e4885ddd5c8599b1942	0	0	0	0	0	0	0	0	0	0	0	0	0	0	0	0	0	0	0	0	0	0	0	0	14	0	0	0	0	0	0	0	0	0	0	0	0	0	0	0	0	0	0	0	0	0	0	0	0
95c39fa8b873f9687098402350d7dac1	0	0	0	0	106	0	0	0	0	0	0	0	0	0	0	0	0	0	0	0	0	0	0	0	0	0	0	0	0	0	0	0	0	0	0	0	0	0	0	0	0	0	0	0	0	0	0	0	0
f65f3c32ae428c81f10793a1a30cf1d7	0	0	0	0	0	0	0	0	0	0	0	0	0	0	0	0	0	0	0	0	0	0	0	0	0	0	0	0	0	0	0	0	0	0	0	0	52	0	0	0	0	0	0	0	0	0	0	0	0
1d6b9da3bd2d4ac1a99d1a57a422c3f1	0	0	0	0	0	0	0	0	0	0	0	0	0	0	0	0	0	0	0	0	0	0	0	0	0	0	0	0	0	0	0	0	0	0	0	0	0	0	38	0	0	0	0	0	0	0	0	0	0
1db207d8920932d0564b1160ece1f076	0	10	0	0	0	0	0	0	0	0	0	0	0	0	0	0	0	0	0	0	0	0	0	0	0	0	0	0	0	0	0	0	0	0	0	0	0	0	0	0	0	0	0	0	0	0	0	0	0
b88a1d1c22ebac60bd361a5e63f94b19	0	0	0	0	0	0	0	0	0	0	0	0	0	0	0	0	0	0	0	0	0	0	0	0	0	0	9	0	0	0	25	0	0	0	0	0	0	0	0	0	0	0	0	0	0	0	0	0	0
cc54f9e9d1859f65f644acea17f9cc2b	0	20	0	0	0	0	0	0	0	0	8	0	0	0	0	0	0	0	0	0	0	0	0	0	0	0	28	0	0	0	9	0	1063	0	0	0	33	0	0	18	0	0	0	0	0	26	0	0	0
08e5b3d0592a17ca9875b04304b8e17c	0	0	0	0	0	0	0	0	0	0	0	0	0	0	0	0	0	0	0	0	0	0	0	0	0	0	0	0	0	0	0	0	0	0	0	0	0	50	0	0	0	0	0	0	0	0	0	0	0
1b20a102db2fb86213fdec762f4678f9	0	0	0	0	0	0	0	0	0	0	0	0	0	0	0	0	0	0	0	0	0	0	0	0	0	0	0	0	0	0	0	0	0	0	0	0	11	0	0	0	0	0	0	0	0	0	0	0	0
563f51d8e274fb335589e5b46cc41cf8	0	0	0	0	0	0	0	0	0	0	0	0	81	0	0	0	0	0	0	0	0	0	0	0	0	0	0	0	0	0	0	0	0	0	0	0	0	0	0	0	0	0	0	0	0	0	0	0	0
7c94b3081355634a70aa2c18507704ad	0	0	0	0	0	0	0	0	0	0	0	0	0	0	0	0	0	0	0	0	0	0	0	0	0	0	0	0	0	0	0	0	0	0	0	0	18	0	0	0	0	0	0	0	0	0	0	0	0
a5e2de733f85d8a8b4b5c3e8fb731992	0	10	0	0	4	0	0	0	0	0	0	0	0	0	0	0	0	0	0	0	0	0	0	0	0	0	0	0	0	0	0	0	0	0	0	0	0	0	0	0	0	0	0	0	0	0	0	0	0
cfaa93a1bea13b3064c6d2e22f82867f	0	0	0	0	0	23	0	0	0	0	0	0	0	0	0	0	0	0	0	0	0	0	0	0	0	0	0	14	0	0	0	0	0	72	0	0	0	0	0	0	0	0	0	46	0	0	19	0	47
9274b2a8d7e93932e2ddd263cc66edba	0	0	0	0	0	0	0	0	0	0	0	0	0	0	0	0	0	0	0	0	0	0	0	0	0	0	0	0	0	0	0	0	0	0	0	0	0	0	0	0	0	0	0	0	0	0	0	0	0
97b3e9c37e05f0448c5ee66be8f60444	0	166	0	169	157	0	109	0	0	42	70	0	0	22	0	25	360	172	293	40	0	131	0	0	0	13	123	24	71	106	45	354	0	0	65	81	23	0	36	0	0	0	0	0	0	461	0	35	0
02ab2c8ceb809ecff46da2ede86d7b63	0	0	0	0	0	0	0	0	0	0	0	0	0	0	0	0	0	0	0	0	0	0	0	0	0	0	0	0	15	0	0	0	0	0	0	0	0	0	0	0	0	0	0	0	0	0	0	0	0
0e68b61a2ba183705d5e7070abaebe36	0	0	0	0	0	0	0	0	0	0	0	0	0	0	0	0	0	0	0	0	0	0	0	0	0	0	0	0	0	0	0	0	0	0	0	0	0	0	0	0	0	0	0	0	0	0	0	0	46
809cc4e2cc20a5680e4ccb0de8d57931	0	0	0	0	0	0	0	0	0	0	0	107	0	0	0	76	0	0	0	0	0	0	223	200	0	0	0	0	0	0	0	0	0	0	0	0	0	0	0	91	0	0	0	0	0	0	152	103	159
6d52ec12cb9122b41bce9c268983dba3	0	82	0	0	148	0	0	66	0	14	0	0	0	0	0	0	0	0	0	0	0	0	0	31	0	0	0	0	0	0	0	0	137	0	50	0	11	0	16	0	0	0	0	0	0	0	0	0	0
331b1c83e394408f2151031231cc54c8	0	190	0	421	224	0	20	0	88	0	0	85	0	101	0	0	0	0	0	0	0	374	0	92	0	116	0	0	0	21	0	0	0	0	0	67	0	0	0	0	0	0	0	0	0	0	0	0	0
a3c12f74c1e8038552a4c42cf23b53b0	0	0	0	0	0	0	0	0	0	0	0	0	0	0	0	0	0	0	0	78	0	0	0	0	0	0	0	0	0	0	0	0	0	0	0	0	0	0	0	0	0	0	0	0	0	0	0	0	0
16783ebc7b3b97ea559afa8be3eb7d47	0	0	0	0	0	0	0	0	0	0	0	16	0	0	128	0	0	0	0	0	0	0	0	0	332	0	0	0	0	0	0	0	0	0	57	0	75	53	0	0	64	0	0	0	0	0	0	0	0
5f922991ac43b8f968a56340bbc6fbf9	0	0	0	0	0	0	0	0	0	0	0	0	0	0	0	0	0	0	0	0	0	0	0	0	0	0	0	0	0	0	0	0	0	0	18	0	0	0	0	0	0	0	0	0	0	0	0	0	0
c03510e937c4f990ce0b4ea58e295336	0	0	0	0	0	0	0	0	0	0	0	0	0	0	0	0	0	0	0	0	0	0	0	0	0	0	0	0	0	0	0	0	0	0	0	0	0	0	0	0	0	0	0	0	0	0	0	0	0
8fe762704d7391c1ce988ed344ace918	369	0	0	1176	0	0	1175	760	5	36	0	37	0	362	0	112	0	4	415	4	0	1710	0	4	2674	245	0	0	33	408	0	1354	0	0	71	3086	0	2076	7	973	3066	6984	0	0	5843	1158	0	373	66
c2b0ebe891aa071edac2cd040caf5fb7	0	0	0	0	0	0	0	0	0	0	0	0	0	0	0	0	0	0	0	0	0	0	0	0	0	0	0	0	0	0	0	0	0	0	0	0	0	0	42	0	0	0	0	0	0	0	0	0	0
354333a2f312da1c9b5ca2b91173fe95	0	0	0	0	0	0	0	0	0	0	0	0	0	0	0	0	0	0	0	0	0	0	0	0	0	0	0	0	0	0	0	0	0	0	0	0	0	0	0	0	0	0	0	0	0	0	0	0	0
6bb1f02f6c252c0d9a532e449533c198	14	623	34	255	769	0	0	0	0	0	106	0	0	0	43	0	0	0	118	0	0	278	376	0	768	0	0	0	0	0	0	0	55	0	0	0	998	0	0	583	0	177	0	0	237	303	209	0	0
6bd72f4cd76b588ce0aadd1508e318cc	0	0	0	0	0	0	0	0	0	0	0	0	0	0	0	0	0	0	0	0	0	0	0	0	0	0	0	0	0	0	0	0	0	0	0	0	0	0	0	0	0	0	0	0	0	0	40	0	0
0aa50480c0c4a630ecaa23a37b4cdb58	0	198	0	0	241	0	0	0	0	0	0	0	0	0	0	0	0	0	0	0	0	0	0	0	0	0	0	0	0	0	0	88	0	0	0	0	0	0	0	104	0	0	0	0	0	0	0	0	0
909791f377723a48209e3a435506ef6d	0	0	0	0	0	0	0	0	0	0	0	0	0	0	0	0	0	0	0	0	0	0	0	0	0	0	0	0	22	0	0	0	0	0	17	0	0	0	0	0	0	0	0	0	0	0	0	0	0
0dbffaf4e49c5a8a0c576e7d0c7a00dc	0	0	0	51	0	0	0	0	0	0	29	0	104	0	0	0	0	0	0	0	0	47	0	32	0	0	0	0	0	144	0	0	0	0	0	0	0	0	0	0	0	0	0	0	0	0	0	0	0
ead3e48c18115665aaa21cf1960b1bd2	0	0	0	0	0	0	0	0	0	0	0	0	0	0	0	0	0	0	0	0	0	0	0	0	0	0	0	0	0	0	0	0	0	0	0	0	0	0	0	75	0	0	0	0	0	0	0	0	0
33d9f785850d3a9f8f1ce4ba04ec1cd0	0	0	0	0	0	0	0	0	0	0	0	0	0	0	0	0	0	0	0	0	0	0	0	0	0	0	0	0	0	0	0	0	0	0	0	0	73	0	0	0	0	0	0	0	0	0	0	0	0
4d441446aad40a27578d6981e757219f	0	0	0	0	0	0	0	0	0	0	0	0	0	0	0	0	0	0	0	0	0	0	0	0	0	0	0	0	0	20	0	0	0	0	0	0	0	0	0	0	0	0	0	0	0	0	0	0	0
20fe4ce43d53c09025e87fe06e493631	0	0	0	0	0	0	0	0	0	0	0	0	0	0	0	0	0	0	0	0	0	0	0	0	0	0	0	0	0	0	0	0	0	0	0	0	0	0	0	0	0	0	0	0	0	142	0	0	0
4891ac10bca3dffa5c5919a2dbb9c05b	0	424	83	582	369	28	0	519	0	401	103	0	0	462	0	157	463	994	57	0	0	487	61	112	137	375	3187	0	845	669	1610	0	63	0	669	65	934	53	1225	211	20	111	465	0	45	3076	60	436	0
59889c4fbd28d8d53af074b47614d0a6	16	0	0	700	0	0	670	228	0	105	188	173	172	33	0	23	0	0	14	0	0	369	0	0	677	31	0	0	521	520	0	0	19	0	286	391	7292	79	472	783	97	304	26	0	97	469	0	0	0
e34ead626d44db1a6c6c279e538ee0bf	0	235	198	264	222	41	26	247	0	29	69	30	147	16	52	0	174	0	18	30	0	295	0	248	113	13	412	0	104	155	94	52	0	19	58	28	0	0	0	35	0	12	41	165	0	65	142	28	0
cd5081313abb6eb4918a31ceaaf25010	0	0	0	0	0	0	0	0	0	0	0	0	80	0	0	0	0	0	0	0	0	0	0	0	0	0	0	0	0	0	0	0	0	0	0	0	0	0	0	0	0	0	0	0	0	0	0	0	0
f56a764114217a044ac4512e822b0f05	0	0	0	0	0	0	0	0	0	0	0	0	0	0	0	0	26	0	0	0	0	0	0	12	0	0	0	0	0	0	0	0	0	0	0	0	0	0	0	0	0	0	0	0	0	0	10	0	0
f0973a31439fb6457cd981350dba4cf2	0	0	0	0	0	0	0	0	0	0	0	0	0	0	0	0	0	0	0	0	0	0	0	0	0	0	0	0	0	0	0	0	0	0	0	0	0	0	0	0	0	0	0	0	0	0	112	0	0
bf0fb643559e2f7fd03ab7bb8685ca34	0	0	0	0	0	0	0	0	0	0	0	0	0	0	0	0	0	0	0	0	0	0	0	0	0	0	0	0	0	0	0	0	0	0	0	0	0	0	0	0	0	0	0	0	0	0	0	0	0
f7809574f1cdb20a50865bf1653863b6	0	0	0	0	0	0	0	0	0	0	0	0	0	0	0	0	0	0	0	21	0	0	0	0	0	0	0	0	0	0	0	0	0	0	0	0	0	0	0	0	0	0	0	0	0	0	0	0	0
14fd1c34c1dc8d9e7a969e455e5250b1	0	0	7	0	0	0	0	0	0	0	0	45	0	0	0	56	0	0	0	0	0	0	0	0	0	0	6	18	107	7	0	0	0	0	0	0	0	0	0	0	10	0	278	5	0	0	0	15	0
841bc3ca792e461ec3a597c533868906	0	0	10	0	0	0	0	0	0	0	23	0	35	7	0	0	0	0	0	13	0	0	0	0	0	0	0	0	0	0	0	0	0	0	0	0	0	0	0	0	0	0	0	0	0	0	0	0	0
f87dfceebe0cea684593108f0ebbe1f4	0	0	0	0	0	0	0	0	23	0	0	0	22	0	0	0	0	0	0	21	0	0	0	0	0	0	0	22	0	0	0	0	19	0	0	0	0	0	0	0	0	0	0	0	0	0	0	0	0
57d130a50aa5feef66556ccde4411bb6	0	0	0	0	0	0	0	0	0	0	0	0	0	0	0	0	0	0	0	0	0	0	0	0	0	23	0	0	0	0	0	0	0	0	0	0	0	0	0	0	0	0	0	0	0	0	0	0	0
b90fc1616147775c31c30b659be45bcc	0	0	0	0	0	0	0	0	0	0	0	0	0	0	0	0	0	0	0	0	0	0	0	0	0	0	0	0	0	0	0	0	0	0	0	0	0	0	0	0	0	0	0	0	0	0	0	0	0
0b69c1dfbab0713908640ca21196eef5	0	0	0	0	0	37	0	0	0	0	0	0	0	0	0	0	0	0	0	0	0	0	0	137	0	0	0	0	0	0	0	0	0	0	0	0	0	0	0	0	0	0	0	0	0	0	0	0	0
6271c911551844d34cad170003e57689	0	0	0	0	0	0	0	0	0	0	20	0	0	475	0	0	0	0	86	0	0	0	592	0	0	395	0	0	0	0	0	0	0	0	0	0	0	0	102	0	0	0	0	0	0	0	0	0	0
a4eef445c2dbe33d5617046317de5a0a	0	0	0	0	0	0	0	0	0	0	0	42	0	0	0	0	0	0	0	0	0	0	0	0	0	0	0	0	0	0	0	0	0	0	0	0	0	0	0	0	0	0	0	0	0	0	0	0	0
7ee8ade2904645402bc4e35edde54178	0	0	0	0	0	0	0	0	0	0	0	0	0	0	0	0	0	0	0	0	0	0	0	0	0	0	0	0	0	0	0	0	0	0	0	0	13	0	0	0	0	0	0	0	0	0	0	0	0
e410b28d0715b05d32c8cd90f23673f8	0	0	0	0	0	0	0	0	0	0	0	0	0	0	0	0	0	0	0	0	0	0	0	0	0	0	0	0	0	0	0	0	0	0	0	0	0	0	0	0	0	0	0	0	0	0	0	0	0
d2c85f67258223eb4216b362e0edd2f8	0	0	0	0	0	0	0	111	0	0	0	0	0	0	0	0	0	0	0	0	0	0	0	0	0	0	0	0	0	0	0	0	0	0	0	0	0	0	0	0	0	0	0	0	0	0	0	0	0
71342948f15ee92d48d12c54ab5bf1c7	0	0	0	0	0	0	0	0	0	0	0	0	0	0	0	0	0	0	0	0	0	0	0	0	0	0	0	0	0	0	0	0	0	0	0	0	0	0	0	0	0	0	0	0	0	0	0	0	0
a930426bea7d2deda71ea17c37171b98	0	0	0	0	0	0	0	0	0	0	0	0	0	0	0	0	0	0	0	0	0	0	0	0	0	0	0	0	0	0	0	0	0	0	0	0	0	0	0	0	0	0	0	0	0	0	0	0	0
d76abb9e15a62617091998e51b970503	0	0	0	0	0	0	0	22	0	0	0	0	0	0	0	0	0	0	0	0	0	0	0	0	0	0	0	0	0	0	0	0	0	0	0	0	0	0	0	33	0	0	0	0	0	27	0	0	0
5a7eae6338e1828f53cd86d61340a135	41	0	0	0	0	0	0	0	0	0	0	0	0	0	0	59	0	0	39	0	0	0	0	0	0	0	84	0	0	37	60	0	0	0	24	0	28	0	0	219	0	0	0	0	0	0	0	0	0
e5669ed4d6856c3f8781949fdc8115a0	0	0	0	0	0	0	0	0	0	0	0	0	0	0	0	0	0	0	0	0	0	0	0	0	0	0	0	0	0	0	0	0	0	0	0	0	486	0	0	0	0	0	0	0	0	0	394	0	0
0aae421de710ad68c14fd55909c0c69d	0	0	0	0	0	0	0	0	0	0	0	0	0	0	0	0	0	0	0	0	0	0	0	0	0	0	0	9	0	0	0	0	0	0	0	0	0	0	0	0	0	0	0	16	0	0	0	0	0
0029d4587e4b9d25dde15fe51f1629f5	0	0	36	0	0	107	0	96	147	0	0	0	48	0	70	0	0	0	0	0	0	0	0	0	0	0	0	0	0	0	0	0	0	230	0	0	0	140	0	0	125	0	0	66	0	0	0	0	133
3fa3ef992327113e01d42b92f55963d4	0	0	0	0	0	0	0	10	0	0	0	0	0	0	0	0	0	0	0	0	0	0	0	0	0	0	0	0	0	0	0	0	38	0	0	0	20	0	0	0	0	0	0	0	0	0	0	0	0
2a3c842924ed6ef325a812bb0a34a73e	0	0	0	0	0	0	0	0	0	0	0	0	0	0	0	0	0	0	0	0	0	0	0	0	0	0	0	0	0	0	0	0	0	0	0	37	0	0	0	0	0	0	0	0	0	0	0	0	0
b7ae8131e4c9fe276d7679c246f1943e	0	0	33	0	0	0	0	21	32	29	110	0	0	343	140	682	0	616	67	172	0	0	52	107	74	224	0	0	74	264	0	0	0	339	23	0	263	0	40	161	0	38	0	0	22	0	0	140	0
e358b285b6e57c9f165aad46e968e85b	0	0	0	0	0	0	0	0	0	0	0	0	0	0	0	0	0	0	0	29	0	0	0	0	0	0	0	0	0	0	0	0	0	0	0	0	0	0	0	0	0	0	0	0	0	0	0	0	0
6f319f304f6e88e9e02861f9a2d7e7c4	0	0	0	0	0	0	0	0	0	0	0	0	0	0	0	0	0	0	0	0	0	0	0	0	0	0	0	0	0	0	0	0	0	0	0	0	0	0	0	0	0	0	0	0	0	0	0	0	0
dc92ea8ebd4d07970743b1977bbd788e	200	132	52	331	171	57	28	53	278	25	179	19	256	257	224	606	136	152	471	94	286	323	45	51	52	201	104	251	126	121	148	146	75	105	48	219	334	30	59	258	31	673	19	587	753	102	346	152	165
48eb8a6fc1eb3fb0caf6042c277da1d6	0	0	0	0	0	0	0	0	0	0	0	0	0	0	0	0	0	0	0	0	0	0	0	0	0	0	0	0	0	0	292	0	0	0	0	0	0	0	0	0	0	0	0	0	0	0	0	0	0
73f7927223efe7154a821082db8b31c7	0	0	0	0	0	0	0	0	0	0	0	0	0	0	0	0	48	0	0	0	0	0	0	0	0	0	0	0	0	0	0	0	0	0	0	0	0	0	0	0	0	0	0	0	0	0	0	0	0
8d10b85db0cbac12fdab1fd5d3cde1a2	0	0	0	0	0	0	0	0	0	0	0	0	0	0	0	0	0	0	0	0	0	0	0	0	0	0	0	0	0	0	0	0	0	0	0	0	0	0	0	0	0	0	0	0	0	18	0	0	0
29b3fab9532d0c90277e62c08a4520e3	0	0	0	0	0	0	0	0	0	0	0	0	0	0	0	0	0	0	0	0	0	0	0	0	0	0	0	0	0	0	0	0	0	0	68	0	0	0	0	0	0	0	0	0	0	0	0	0	0
512c47654ad41ca0b7948113a0d74804	0	0	0	0	0	0	0	0	0	0	0	4	0	0	0	0	0	0	0	0	0	0	0	0	0	0	0	0	0	0	0	0	56	0	0	0	0	0	0	0	34	0	0	0	0	0	0	0	34
88e11d2b0700314d2aaae3f1758c33ec	0	0	0	0	0	0	0	0	0	0	0	0	0	0	0	0	0	0	0	0	0	0	0	0	0	0	0	0	0	0	0	0	0	0	0	0	0	0	0	0	0	0	0	0	0	0	0	0	0
7d217ea8fdeea5e089a8db1c73760709	0	0	0	0	0	0	0	0	0	0	0	0	0	0	0	0	0	0	0	0	0	39	0	0	0	0	0	0	0	0	0	0	0	0	0	0	0	0	0	0	0	0	0	0	0	0	0	0	0
123efab1fe28619dd883074edb133d43	0	0	0	0	0	0	0	0	0	0	0	0	0	30	0	0	0	0	0	0	0	0	0	0	0	0	0	0	0	0	0	0	0	0	0	0	0	0	0	0	0	0	0	0	0	0	0	0	0
d0f0bd00accf01d88eb217ea4a7d90e0	0	0	0	0	0	0	0	0	0	0	0	0	0	0	0	0	0	0	0	0	0	0	0	0	22	0	0	0	0	0	0	0	0	0	0	0	0	0	0	0	0	0	0	0	0	0	0	0	0
e9963db4c2f511c049afb86da50cf583	17	139	39	48	153	53	43	25	89	25	44	33	0	23	36	50	13	9	37	54	18	34	144	19	64	18	28	9	66	33	25	25	18	51	41	58	70	51	0	131	55	42	17	102	27	38	32	50	40
40aa3e071600c39186f65217f3001ed8	267	411	414	1237	313	376	1609	407	1009	26	309	71	925	2040	415	383	215	418	1938	3193	2329	1072	158	122	503	649	552	398	198	424	1083	752	192	279	62	1210	2216	325	96	1324	366	1370	173	1022	1427	380	878	502	199
21b112290b03eb753066211716896b63	11	45	10	0	75	0	0	108	0	0	0	0	9	9	0	0	17	0	27	55	0	0	5	33	0	6	152	14	0	0	46	0	361	0	0	11	86	0	0	94	0	0	0	41	0	49	7	0	0
c5c2a2881097931a1a59dbacb42e528e	0	0	0	0	0	0	0	0	0	0	20	0	0	0	0	0	0	0	0	0	0	0	0	0	0	0	0	0	0	0	0	0	0	0	0	0	0	0	0	0	0	0	0	0	0	0	0	0	0
4cee93e382f4454e14cac2b4a605f897	0	0	0	0	0	0	0	268	0	0	0	0	0	0	0	0	0	0	0	0	0	0	0	0	125	0	0	0	0	0	0	0	0	0	0	0	0	0	0	0	0	0	0	0	0	0	0	0	0
08e7358f73d7f8aa1bd5e976a65c8112	0	0	0	0	0	0	0	0	0	0	0	0	0	0	0	0	0	0	0	0	0	0	0	0	0	0	0	0	0	0	0	0	0	30	0	0	0	0	0	0	0	0	0	0	0	0	0	0	0
713ad729f57e0df6c4382d613ec0e888	0	0	0	0	0	0	0	0	0	0	0	31	0	0	0	0	0	0	0	0	0	0	0	0	0	0	0	0	0	0	0	0	0	0	0	0	0	0	0	0	0	0	0	0	0	0	0	0	0
54797feb212c977916248eade78412da	0	0	0	0	0	0	0	0	0	0	0	0	0	0	0	0	0	0	0	0	0	0	0	0	0	0	0	0	0	0	0	0	0	0	0	100	0	0	0	0	0	0	0	0	0	0	0	0	0
fa5a8e62fdac6d6798afb424e50c3e64	81	2149	206	693	2468	240	840	1155	95	1265	675	1376	194	353	39	649	837	830	210	72	952	419	744	263	1575	376	3126	0	2698	430	1232	406	59	117	1994	1247	1271	41	458	1183	46	538	691	36	432	2506	46	361	0
454e2d591c839cbe25547666e4a9d9c0	0	0	0	0	0	0	18	0	0	37	0	0	36	0	0	0	0	0	0	7	0	0	0	0	0	0	0	0	91	39	0	0	0	0	46	0	0	0	0	0	0	0	0	9	0	78	0	0	0
82edf05278c292d1122f7960e5e9b0ca	0	0	0	0	0	0	0	0	0	0	0	0	0	0	0	0	0	0	0	181	0	0	0	0	63	0	0	0	0	0	0	0	132	0	0	0	0	0	0	0	0	70	0	0	57	0	0	0	0
975e3ea1d485cd242d7984463de280d0	0	97	0	0	60	89	0	14	0	3	0	0	54	0	0	0	0	6	89	390	46	0	0	171	29	0	0	14	10	47	0	58	0	0	10	29	151	0	0	289	0	0	0	66	0	0	82	0	0
b4b459c68b9f74e090000aca0b54faa1	0	0	0	0	0	0	0	0	0	0	0	0	0	0	0	0	0	0	0	0	0	0	0	0	0	0	0	0	0	0	0	0	0	0	0	0	0	11	0	0	11	0	0	0	0	0	14	0	0
093a16311058340ecae94755c40c16ca	0	0	0	0	0	0	0	0	0	0	0	0	0	0	0	0	0	0	0	0	0	0	0	0	0	0	0	0	0	0	0	0	0	0	0	0	0	0	0	0	0	0	0	0	0	0	0	0	0
31a84c15e18e809d8d70ce6b746baff3	0	0	0	7	0	0	646	0	0	0	0	0	0	0	0	6	0	0	7	0	0	0	0	0	0	0	62	0	18	13	23	0	12	0	13	14	0	0	20	9	0	0	0	0	0	0	0	0	0
9c96479dff966224f00f9dbb11e150df	0	0	0	0	0	0	0	0	0	0	0	0	0	0	0	0	0	0	0	0	0	0	0	0	0	0	0	0	0	0	0	0	0	0	0	0	0	0	0	126	0	0	0	0	0	0	0	0	0
43472a28e25886e03a78f9b5ad97d1dd	0	0	0	0	0	0	0	0	0	0	0	0	0	0	0	0	0	0	0	0	10	0	0	0	0	0	0	0	0	0	0	0	0	0	0	0	0	0	0	0	0	0	0	0	0	0	0	0	0
81bac38b763664a5ba3bc35da137ad08	0	0	0	0	0	0	0	0	0	0	0	0	0	0	0	0	0	0	0	0	0	0	0	0	0	0	0	0	0	0	0	0	0	0	0	0	0	0	0	0	0	0	0	0	0	0	0	0	0
3ab19dbc259c2990137617e5a2aabe01	0	0	0	0	0	0	0	0	0	0	0	13	0	0	0	0	0	0	0	0	0	0	0	0	0	0	0	0	0	0	0	0	0	0	0	0	0	0	0	0	0	0	0	0	0	0	0	0	0
745a4b67ce59bed3672450338f41b63c	0	0	0	28	0	0	0	0	0	0	0	0	0	0	0	0	0	0	0	0	0	19	0	0	0	0	0	0	0	0	0	0	0	0	0	0	0	0	0	0	0	12	0	0	0	0	0	0	0
0ccb20256538128da354a9b539b7090f	205	5122	387	1193	5391	348	546	2094	147	852	1415	1643	515	912	365	903	6115	1628	207	240	181	1199	1266	7999	1509	690	6916	163	2763	369	3705	926	85	330	1333	752	1944	284	1036	1276	380	2560	298	405	2558	3152	369	768	88
b833d98ceeab6b84a515148ff895c9d0	136	0	0	0	0	0	138	0	0	8	0	0	0	0	0	21	0	0	0	0	0	0	28	0	0	0	0	0	92	0	0	0	0	0	30	61	0	0	0	0	0	0	0	0	0	0	0	0	0
357b470915553c2a9965f2b6a5273d24	0	0	0	0	0	0	0	0	0	0	0	0	0	0	0	10	0	0	0	0	0	0	0	0	0	0	0	23	17	0	0	0	0	0	0	0	0	0	0	0	0	0	0	0	0	0	0	0	0
f2c73fe8faf80fbce2e2069aaa02ff30	0	0	0	0	0	0	0	20	0	0	0	0	0	0	0	0	0	0	0	0	0	0	0	0	0	0	0	0	0	0	0	0	0	0	0	0	0	0	0	0	0	0	0	0	0	0	0	0	0
5040da88ede2368a8204bfb4989e258b	0	0	0	0	0	0	0	0	0	0	0	0	337	0	0	0	0	0	0	0	0	0	0	0	0	0	0	0	0	0	0	0	0	0	0	0	0	0	0	0	0	0	0	0	0	0	0	0	0
3ea973557164d95320ad0f63179428b2	0	0	0	0	0	0	0	0	0	0	0	0	0	0	0	0	0	0	0	0	0	0	0	0	0	0	0	0	0	0	0	0	0	0	0	0	0	10	0	0	0	0	0	0	0	0	0	0	0
0200d53322044c1109b10800fc3fcf77	0	0	0	0	19	0	0	17	0	0	0	0	0	0	0	0	0	0	0	58	0	0	0	0	0	0	0	0	0	0	0	0	11	0	0	0	49	0	8	64	0	0	0	0	0	26	0	0	0
040402d57c77126c53f6de2ea17592cc	0	0	45	111	0	76	146	27	45	0	71	0	0	26	0	140	0	0	194	44	0	81	0	0	0	16	0	0	0	65	0	142	76	34	0	93	385	23	0	121	32	101	0	33	69	132	47	42	54
46d48d49d24579ab46bb97ef9e31fde6	0	0	0	0	0	0	0	0	0	0	0	0	0	0	0	0	0	0	0	0	0	0	0	0	0	0	0	0	0	0	0	0	0	0	0	0	0	0	0	0	0	11	0	0	0	0	0	0	0
8b854202abcb1762dea08971396cc411	0	0	213	0	0	0	0	0	0	0	0	67	0	0	0	0	0	0	0	0	0	0	0	0	0	0	0	0	0	0	0	0	0	0	0	0	0	22	0	0	25	0	0	0	0	0	0	0	0
0be6f8cfa6b04df6290136a9c7fe3605	0	0	0	0	0	0	0	0	0	0	0	0	0	0	0	0	0	0	0	0	0	0	0	0	0	0	0	0	0	0	0	0	0	0	0	0	31	0	0	0	0	0	0	0	0	0	0	0	0
42269f53b687fde0a66b5a38951d88e8	0	0	0	0	0	0	0	0	0	0	0	0	0	0	0	0	0	0	0	0	0	0	0	0	0	0	0	0	0	12	0	14	0	0	0	0	0	0	0	0	0	0	0	0	0	0	0	0	15
446ff690701ace7970728c88015dbc0b	0	0	0	0	0	0	0	0	0	0	5	0	0	0	70	0	0	0	0	0	0	0	0	0	4	0	0	0	0	0	0	0	0	45	0	0	0	0	0	0	0	0	0	0	0	0	0	0	0
8176fb52dfba11069e1ce5fc32ac798b	0	0	0	0	0	0	0	0	0	0	0	0	0	0	0	0	13	0	0	0	0	0	0	0	0	0	0	0	0	0	0	0	78	0	0	0	0	0	0	0	0	0	0	0	0	0	0	0	0
54f3ea01f5526a489fa75a1935fb0597	0	0	0	0	0	0	0	0	0	0	0	0	0	0	0	0	0	0	0	0	0	0	0	0	0	0	0	0	0	0	0	0	0	0	0	0	0	0	0	0	0	0	0	0	0	0	0	0	0
601fafdd4e17db7473ce5d06e41b30ef	0	0	0	0	0	0	0	0	0	0	0	0	0	0	0	0	0	0	0	0	0	0	0	0	0	0	0	11	0	0	0	0	0	0	0	0	0	0	0	0	0	0	0	0	0	0	0	0	0
723967a3e68e8020f1250ccc93d306b1	0	0	0	0	0	0	0	0	0	0	0	0	0	0	0	0	0	0	0	0	0	0	0	0	0	0	0	0	0	0	0	0	0	0	0	0	0	413	0	0	447	0	0	0	0	0	0	0	0
3f6709e92b145cde1bc725bf3f6f02c8	0	70	13	209	75	85	0	107	78	0	40	0	19	23	109	141	20	0	66	31	51	156	0	43	75	28	0	30	26	67	0	139	91	20	19	0	0	0	17	54	11	111	114	36	72	16	14	0	31
fd737cab732bb29283917a0ee160f5db	0	0	0	0	0	0	0	0	0	0	0	0	0	0	0	0	0	0	0	0	0	0	0	0	0	0	0	0	0	0	0	0	0	0	0	0	0	0	0	0	0	0	0	0	0	0	0	0	0
34d88905a7247bdb405abde199cd0bea	0	0	0	0	0	0	0	0	494	0	510	0	206	689	0	0	0	0	0	68	0	0	0	0	2728	368	297	0	0	93	102	734	0	0	0	0	391	0	0	0	0	0	0	79	0	334	796	505	0
8511bc2118f6cd631bf4df0f193588ba	0	0	0	0	0	0	0	0	0	0	0	0	0	0	0	0	0	0	0	0	0	0	0	0	0	0	0	104	0	0	0	0	0	0	0	0	0	0	0	0	0	0	0	0	0	0	0	0	0
295b0f0d87e074ba5a3d9bb22197deed	0	0	0	0	0	0	0	0	0	0	0	0	0	0	0	0	0	0	0	0	0	0	0	0	0	0	0	0	0	0	0	0	0	0	0	25	0	0	0	0	0	0	0	0	0	0	0	0	0
1eee0cf7702ac325dbaf3fedf1db17e2	0	0	0	0	0	0	0	0	0	0	82	0	0	0	0	0	0	0	0	0	0	0	0	0	0	0	0	0	0	0	0	0	0	0	0	0	0	0	0	0	0	0	0	0	0	0	0	0	0
61e59a0d34071f2be097bf84bd8ccccb	0	0	0	0	0	274	0	0	0	0	0	0	0	0	0	0	0	0	0	0	0	0	0	0	0	0	0	0	0	0	0	0	0	0	0	0	0	45	0	0	32	0	0	0	0	0	0	0	0
d1291bb5cfbaae80e3dd9dc7fc403364	0	0	0	0	0	0	0	0	19	0	0	0	0	0	0	0	0	0	0	0	0	0	0	0	0	0	0	0	0	0	0	0	0	0	0	0	0	0	0	0	0	0	0	0	0	0	0	0	0
da8811db929e0ad28e966109429eed05	0	0	0	0	0	0	0	0	0	0	0	0	0	0	0	0	0	0	0	0	0	0	0	0	0	0	0	0	0	0	0	0	0	0	0	0	0	0	0	0	0	0	0	0	0	0	0	0	0
b7dd898d0ecc44f39cc6d65c9e0612c9	0	0	0	0	0	0	0	0	0	0	0	23	14	0	0	0	0	0	78	0	0	0	0	0	0	0	0	65	0	0	0	0	0	0	0	0	0	24	0	80	20	0	0	80	0	0	0	0	146
e88bf2cbc1cee2060b232ec0093efe5e	0	0	17	0	0	0	0	0	8	0	0	0	0	0	20	0	8	0	0	0	0	0	0	0	0	0	0	0	0	5	0	0	0	9	0	0	0	0	0	0	0	0	0	10	0	0	3	0	0
1e27a4c997aab3f582fd21ceb798c2be	0	0	0	0	0	0	0	0	0	0	0	0	0	0	0	0	0	0	0	0	0	0	0	0	0	0	0	0	20	0	0	0	0	0	0	0	0	0	0	0	0	0	0	0	0	0	0	0	0
01ece2e98247b80bec855be92f3cfa2e	0	0	0	0	0	11	0	0	0	0	0	0	0	0	0	0	15	0	0	0	0	0	0	0	0	0	0	28	0	0	0	0	0	9	0	0	0	2	9	2	5	0	0	0	0	0	13	0	0
013157132e260e4d2c34a330daa085eb	0	0	0	0	0	0	0	0	0	0	0	0	0	0	0	0	0	0	0	0	0	0	0	0	0	0	0	0	0	0	0	0	0	0	0	0	0	0	0	0	0	0	71	0	0	0	0	0	0
727632a19d66e65e75079d19f819d732	0	0	0	0	0	0	0	0	0	0	0	0	20	0	0	0	0	0	0	0	0	0	0	0	0	0	0	0	0	0	0	0	0	0	0	0	0	0	0	0	0	0	0	0	0	0	0	0	0
439824e4e61c65da573c2a80f413b745	0	0	0	0	0	0	0	0	0	0	0	0	0	0	0	0	0	0	0	0	0	0	0	0	0	0	0	0	38	0	0	0	0	0	0	0	65	0	0	0	0	0	0	0	0	0	0	0	0
ceea9db800bc2f3a15c6c1c11897de0e	0	0	0	0	0	0	0	0	0	0	22	0	0	0	0	0	0	0	0	0	0	0	0	0	0	0	0	0	0	0	0	0	590	0	0	0	7	0	0	0	0	0	0	0	0	0	0	0	0
c4752b1c9085763e87c16034aa026549	0	0	0	0	0	56	0	0	0	0	0	0	0	0	0	0	0	0	0	0	0	0	0	0	0	0	72	0	101	0	0	0	0	0	0	0	0	0	0	0	0	0	0	0	0	0	0	0	0
f53805539fcf9e99158ffbbba83e1c99	0	0	0	0	0	40	0	0	0	0	0	0	0	0	0	0	0	0	0	0	0	0	0	0	0	0	0	0	0	0	0	0	0	0	0	0	0	0	0	0	0	0	0	0	0	0	0	0	0
ce00878fbbc871cfdefcdd717ea26270	0	0	0	0	0	0	0	0	0	0	0	0	0	10	0	0	0	0	0	0	0	0	0	0	0	0	0	0	0	0	0	0	0	0	0	0	0	0	0	0	0	0	0	0	0	0	0	0	0
b5f466aac1f38dbb8fa91f50368202f4	0	0	0	0	19	0	0	0	0	0	0	0	0	0	0	0	0	0	0	0	0	0	0	0	0	0	0	0	0	0	0	0	0	0	0	0	0	0	0	0	0	0	0	0	0	0	0	0	0
4644a35a4d9c9fbc2bebeac470ca9ffa	0	0	0	0	0	0	0	0	0	0	0	0	0	0	0	0	0	0	0	0	0	0	0	0	0	0	0	0	0	0	0	0	0	0	0	0	0	0	0	161	0	0	0	0	0	0	0	0	0
c990e6537339377337082d99209b4047	0	0	0	0	0	0	0	0	0	0	11	0	0	0	0	0	0	0	0	0	0	0	0	0	0	0	0	0	0	0	0	0	0	0	0	0	0	0	0	0	0	0	0	0	0	0	0	0	0
1bfa36af799b1cd1e60ec24ffadc1673	0	0	51	24	0	26	0	0	47	0	21	0	0	18	0	0	0	15	13	0	0	43	29	16	0	24	0	53	10	50	0	0	9	78	16	0	0	28	0	0	31	31	0	81	17	18	22	0	0
4716232ff1b1b7e57effc414d69202a5	0	0	0	0	0	0	0	0	0	0	0	0	0	0	0	0	0	0	0	0	0	0	0	0	0	0	0	0	0	16	0	0	0	0	0	0	0	0	0	0	0	0	0	0	0	0	0	0	0
b448092967a3a1383b941d5a5db1e84a	0	0	0	0	0	0	0	0	0	0	0	0	0	0	0	0	0	0	0	0	0	0	0	0	10	0	0	0	4	0	0	0	0	0	12	0	0	0	0	0	0	0	0	0	0	0	0	0	0
1a34c7b1687c3854379352fb2653e344	0	0	0	0	0	0	0	0	0	0	0	0	0	0	0	0	0	0	0	0	0	0	0	0	0	0	0	0	0	0	0	0	0	0	0	0	0	0	0	0	0	0	0	0	0	0	0	0	0
5f49a99e8f82da491f033ac4aa46a128	0	0	0	0	0	0	0	0	0	0	0	0	0	0	0	0	0	0	0	0	0	0	0	0	0	0	0	0	0	0	0	0	0	0	0	0	0	0	0	0	0	0	0	0	0	0	0	0	0
53b6c28ba31ed51139ab0ec9290cf8da	0	0	0	0	0	0	0	0	0	0	0	0	0	0	0	0	0	0	0	0	0	0	0	0	0	0	0	0	0	0	0	0	0	0	0	0	0	0	0	0	0	0	0	0	0	0	0	0	0
ad0896bbf834dcd76a615c6f5463f9b9	0	0	0	0	0	0	0	0	0	0	0	36	0	0	0	0	0	0	0	0	0	0	49	0	0	0	0	0	0	0	0	0	0	0	0	0	0	88	0	0	98	0	0	0	0	0	0	0	0
f226d68590755262412e74e37802a3a7	0	0	0	0	0	0	0	0	0	0	0	0	0	0	0	0	0	0	0	0	0	0	0	0	0	0	0	65	0	0	0	0	0	0	0	0	0	0	0	0	0	0	0	0	0	0	0	0	0
510a42199c24ed9fc1f64996c9bfcd72	0	0	0	0	0	0	0	0	0	0	0	0	0	0	0	0	0	0	0	0	0	0	0	0	0	0	0	0	18	0	0	0	0	0	0	0	0	0	0	0	0	0	0	0	0	0	0	38	0
304e664d3cd45a8cc1652b76787a9aba	0	0	0	0	0	0	0	0	0	0	0	0	0	0	0	0	0	0	0	0	0	0	0	0	33	0	0	0	0	0	0	0	0	0	0	0	0	0	0	0	0	0	0	0	0	0	0	0	0
b5dd450718fd60719f5ce6b27c108213	0	0	0	0	0	0	0	0	0	0	0	0	0	0	0	0	0	0	43	0	0	0	0	0	0	0	0	0	0	0	0	0	0	0	0	0	0	0	0	0	0	0	0	0	0	0	0	0	0
d1d36e22c2d1924ac1c53e699f551efc	0	0	0	0	0	0	0	23	0	0	0	0	0	0	0	0	32	0	0	0	0	0	0	35	0	0	56	146	0	0	0	0	0	0	0	0	0	0	30	0	0	0	0	0	0	0	0	0	0
6f710a34754fc1a90362c963480f43bc	0	0	0	0	0	73	0	0	56	0	0	0	0	0	0	0	0	0	0	0	0	0	0	0	0	0	0	0	0	0	0	0	0	0	0	0	0	0	0	0	0	0	0	38	0	0	0	0	0
dffbf65ed9d28a0d96e83c7f25632514	0	55	439	0	57	273	0	907	253	0	0	303	150	0	499	0	0	0	0	269	0	0	0	177	0	0	0	144	0	0	0	0	0	280	0	0	0	612	0	0	447	0	0	223	0	0	0	0	57
fe0ed954818c38ef230d35b9ae889733	0	0	0	0	0	0	829	0	0	0	0	0	0	0	0	43	0	0	0	89	0	0	0	0	0	0	0	0	0	0	0	0	0	0	0	133	0	0	0	0	0	0	0	0	0	0	0	0	0
1ba40ab076e2164a82e0417a8202ea38	0	0	0	48	0	0	37	0	0	0	97	149	19	0	0	0	0	18	0	0	0	39	105	0	0	0	16	0	0	159	13	195	0	0	0	41	0	0	0	110	0	26	67	0	11	26	52	70	0
58cc061da539e5712f603764be33d5b7	0	0	0	0	0	0	0	0	0	0	0	0	0	0	0	0	0	0	0	0	0	0	0	0	0	0	0	0	0	0	0	0	0	0	0	0	0	0	0	0	128	0	0	0	0	0	0	0	0
4ba8aa90f87f081bd12139ca78405193	0	0	0	12	0	0	0	0	0	0	0	0	0	0	0	0	0	0	0	0	0	0	0	0	0	0	0	0	0	0	0	0	0	0	0	0	0	0	0	0	0	0	0	0	0	0	0	0	0
cd527ff28f0488e396eb44d5b7cbc19c	0	0	0	0	0	0	0	0	0	0	0	0	0	0	0	0	0	0	0	0	0	0	0	0	0	0	0	0	52	0	0	0	0	0	0	0	0	0	0	0	0	0	0	0	0	0	0	0	0
7f29bbf3d1c2c4db8cab0234b4b39143	0	0	0	0	0	0	0	0	0	0	0	0	0	0	0	0	0	0	0	0	0	0	0	0	0	0	0	0	0	0	0	0	0	0	0	0	0	0	0	0	0	0	0	0	0	0	0	0	0
89651b9cef334aa9009429b42f4d6e33	0	0	0	0	0	0	0	0	0	0	0	0	0	0	0	0	0	0	0	0	0	0	0	14	0	0	0	0	0	0	0	0	0	0	0	0	0	0	0	0	0	0	0	0	0	0	0	0	0
00658e2c5428a0148777fa136f62f01a	0	0	0	0	0	0	0	0	0	0	0	0	0	0	0	0	6	0	0	0	0	0	0	0	0	0	0	122	0	0	0	0	0	0	0	0	0	0	0	0	0	0	0	48	0	0	0	0	0
ace119fe8073d09249e63c29a0d82ce3	0	0	0	0	0	0	0	0	0	0	0	0	0	0	0	0	0	0	0	0	0	0	0	0	0	0	0	0	0	0	0	0	0	0	0	0	0	0	0	0	0	0	0	0	0	0	102	0	0
362c0513fbc9e8f9450c8e9b5a2995ec	0	0	0	0	0	0	0	0	0	0	0	0	0	0	0	0	0	0	0	0	0	0	0	0	0	0	0	0	0	0	0	0	0	0	0	0	0	0	0	0	0	0	60	0	0	0	0	0	0
fc8e19110a7fa1c6416f8907597fb685	0	0	0	0	0	0	0	0	0	0	0	0	0	0	0	0	0	0	0	0	0	0	0	0	0	0	0	0	0	0	0	0	0	0	0	0	0	0	0	0	0	0	0	0	0	13	0	0	0
860e6267b518ed730412152de255963c	0	0	0	0	0	0	0	0	0	0	0	0	0	0	0	0	0	0	0	0	0	0	0	0	0	0	0	0	0	0	0	0	0	0	0	0	0	0	0	0	31	0	0	0	0	0	0	0	0
746315e03925154e586e4d0d4393ef50	2319	581	2082	1894	570	4858	274	326	18889	543	2969	422	4917	2382	5259	522	522	1358	1576	7282	5441	2082	112	1371	1396	2013	2218	15764	2119	1577	1830	1863	2040	12180	975	3270	1304	9911	651	3158	10004	2334	103	13696	1889	1556	6914	1640	5795
9e9fd0041d9e6e932eb0866e622c2911	0	0	0	12	0	0	0	0	0	0	0	0	0	0	0	0	13	0	0	0	0	0	0	0	0	0	0	0	0	0	0	0	0	0	0	0	0	0	0	0	0	0	0	15	0	0	0	0	0
8da4ff9fa483356f8cd8d74f1742f8f5	0	0	12	0	0	0	0	0	0	0	0	0	0	0	0	0	0	0	0	0	0	0	0	0	0	0	0	0	0	0	0	0	0	0	0	0	0	0	0	0	0	0	0	0	0	0	0	0	0
dcb5f9bf9b6ae527f90b982ef5e43693	0	0	0	0	0	0	0	0	0	0	0	0	0	0	0	0	0	0	0	0	0	0	0	0	0	0	0	0	0	0	0	0	0	0	0	0	0	0	0	0	0	0	0	0	0	0	0	0	0
a2bfd90f5694660bdec4382463d34827	0	0	0	0	0	0	0	0	0	0	0	0	0	0	0	0	0	0	0	0	0	0	0	0	0	0	0	0	0	0	0	0	0	0	0	0	86	0	0	0	0	0	0	0	0	0	0	0	0
47ee5e2064da1912cc460178b4d6a42e	0	0	0	0	0	0	0	0	0	0	0	0	0	0	0	0	0	0	0	0	0	0	0	0	0	0	0	0	0	0	0	0	0	0	0	0	0	0	0	0	0	0	0	0	0	0	0	0	0
a32dcf41c75b3d7ecb866e70f7082184	0	0	0	0	0	0	0	0	0	0	0	0	0	0	0	0	0	0	0	0	0	0	0	0	0	0	0	0	0	0	0	0	0	0	23	0	0	0	0	0	0	0	0	0	0	0	0	0	0
2208bcb94d2533ccc6d4c8ebf0c2550e	0	0	0	0	0	0	0	0	0	0	0	0	0	0	0	0	0	0	0	0	0	0	0	0	0	0	0	0	0	0	0	0	45	0	0	0	0	0	0	0	0	0	0	0	0	0	0	0	0
9c41122e8cd9ebc0950ee4b09fa0dc75	0	0	39	0	20	113	64	0	0	0	126	0	47	0	108	49	0	0	81	29	0	0	0	0	0	0	0	262	0	46	0	0	432	0	0	0	94	29	0	69	37	0	0	38	0	0	0	13	112
9c6c08e7e26cb6d7098e9bb2fa28943a	0	0	0	0	0	0	0	0	0	0	0	0	0	0	0	0	0	0	0	0	0	0	0	0	0	0	0	0	0	0	0	0	0	0	0	0	0	0	0	0	0	0	0	0	0	0	0	0	0
40c5901c9c7d94d6b2100f7269de66d6	0	0	0	48	0	0	110	142	0	0	0	192	0	0	0	0	0	0	0	45	0	14	0	0	0	0	0	0	0	362	0	0	35	0	0	26	0	0	0	1373	0	0	0	0	0	17	5	0	0
15109012cbf9f8197797231f65700e7c	0	39	0	0	64	0	0	0	0	0	0	0	0	0	0	0	26	0	0	127	0	0	0	66	0	0	126	104	0	0	0	0	156	49	0	0	104	0	153	0	0	0	0	62	0	0	0	0	0
3e559cc1329bd9ad8f0a5e3dfc9a9141	82	0	0	0	0	0	0	0	85	0	0	0	0	0	35	0	0	0	0	0	0	0	0	0	0	0	0	0	0	0	0	0	0	26	0	0	0	0	0	0	0	0	0	0	0	0	0	0	0
c10db4324a73b983907c8cd0a8cbf486	80	3299	295	6458	3807	416	692	2655	16	828	2580	2861	68	867	341	1158	1690	3866	158	128	147	3940	824	582	733	863	2517	0	1373	1054	2486	639	241	223	1267	150	1414	67	2219	2966	37	853	1319	0	390	2712	224	1856	0
daf8fb02b6402329536e8aaf139f0b03	0	0	0	0	0	58	0	27	0	0	21	0	269	0	0	68	0	56	0	63	0	0	0	0	46	0	793	0	0	75	76	0	0	0	0	0	94	0	0	46	0	35	0	80	42	0	107	52	0
b07844c9108738f10dd3ff9673e8b689	0	0	0	0	0	0	0	0	0	0	0	0	0	0	0	0	0	0	0	0	0	0	0	0	0	0	0	0	0	0	0	0	0	0	0	0	0	0	0	0	0	0	0	0	0	0	0	0	0
0043116c603bfe75dcc2d2d74c9c4dfa	0	0	0	0	0	0	0	0	11	0	0	0	0	0	0	0	0	0	0	0	0	0	0	0	0	0	0	0	0	0	0	0	0	0	0	0	0	11	0	0	0	0	0	0	0	0	25	0	0
6e9aca08e4f61ebcbdd99ba149bb3509	0	0	0	0	0	0	0	0	0	0	0	0	0	0	0	0	0	0	0	0	0	0	0	0	0	0	0	22	0	0	0	0	0	0	0	0	0	0	0	0	0	0	0	0	0	0	0	0	0
218fd0ac9a92dbdeebcb77c409ac0495	0	0	0	0	0	0	0	0	0	0	0	0	0	0	0	0	0	0	0	0	0	0	0	0	0	0	0	0	0	0	0	0	0	0	0	22	0	0	0	0	0	0	0	0	0	0	0	0	0
10d9f57b221309ae8bb1b745bd38ae76	0	0	0	0	0	0	0	0	0	0	0	0	0	0	0	0	0	0	0	0	0	0	0	352	0	0	0	0	0	0	0	0	0	0	0	0	0	0	0	0	0	80	0	0	0	0	0	0	0
03e21f98dcfbac71142b76c0fc20eb46	0	0	0	0	0	0	0	0	0	0	0	0	95	0	0	0	0	0	0	0	0	0	0	0	0	0	0	0	0	0	0	0	0	0	0	0	0	0	0	0	0	0	0	0	0	0	0	0	0
2dea88c59674b539cd1f833b19e2c697	0	0	0	61	0	0	0	481	0	132	70	0	0	0	0	117	0	0	0	0	823	0	296	0	0	0	0	0	221	62	0	0	0	57	212	0	0	0	0	75	0	0	0	0	0	109	0	0	0
28c5ca2ffb649bbefc1398202ca6c60b	0	0	0	0	0	0	0	0	0	0	0	0	0	0	0	0	0	0	0	0	0	0	0	0	0	0	0	0	0	0	0	0	0	0	0	0	0	0	0	0	0	0	0	0	0	0	0	0	0
d85621d6498348136ae2c9345e16ad2d	0	0	0	0	0	0	0	0	0	0	0	0	0	0	0	0	0	0	0	0	0	0	0	0	0	0	0	0	0	0	0	0	0	0	0	0	0	0	0	0	0	0	0	0	0	0	0	0	0
018134665b7d7accd4ef118613f66a48	0	0	0	0	0	0	0	0	0	0	0	0	0	0	0	0	0	0	0	0	0	0	0	0	0	0	0	0	0	0	0	0	0	0	0	0	0	0	0	382	0	0	0	0	0	0	0	0	0
5b7be3d751ef00278675d0de5132c411	0	0	0	0	0	0	0	0	0	0	0	0	0	0	0	0	0	0	0	0	0	0	0	0	0	0	0	0	0	0	0	0	0	0	0	0	54	0	0	0	0	0	0	0	0	0	0	0	0
2c02c666420e1c7af2e8489a70efccf3	0	0	0	0	0	33	0	0	0	0	0	0	0	0	0	0	0	0	0	0	0	0	0	0	0	0	0	0	0	0	0	0	0	0	0	0	0	0	0	0	0	0	0	0	0	0	0	0	0
04c4267ae27d6f28dd2e3fe2e7005238	0	0	0	0	0	0	0	0	0	0	0	0	0	0	0	0	0	0	0	0	0	0	0	0	13	0	0	0	10	0	0	0	0	0	7	0	0	0	0	0	0	0	0	0	0	0	0	0	0
771b9f0b7cfce3d1db1286d4145a3ee3	0	0	0	0	0	0	0	0	0	0	0	0	0	37	0	0	0	0	0	0	0	0	0	0	0	0	0	0	0	0	0	0	0	0	0	0	0	0	0	0	0	0	0	0	0	0	0	0	0
49c8d5c7443330a4b20f50fae4a0b88d	55	83	13	11	152	0	0	212	0	0	48	0	0	18	87	37	130	0	51	0	0	10	181	144	16	0	508	152	0	84	260	20	2518	160	0	0	521	29	0	345	51	0	0	35	0	454	20	0	13
49ba9304f9e164d3e5b61861ecd32625	0	0	0	0	0	0	0	0	0	0	0	17	0	0	0	0	0	0	0	0	0	0	0	0	0	0	0	0	0	0	0	0	0	0	0	0	0	0	0	0	0	0	0	0	0	0	0	0	0
9cd69c4c448aedfdff885382c888b3d2	170	0	0	0	0	0	0	0	0	0	0	0	0	0	0	0	0	0	0	55	0	0	74	0	0	0	0	0	0	0	0	60	0	0	0	0	92	0	0	140	0	0	0	0	0	0	0	0	0
b82da56a2bdeaac4a54c2b241b415dfb	0	0	0	0	0	0	0	0	0	0	0	0	0	0	0	0	0	0	0	0	0	0	0	0	0	0	0	0	0	0	0	0	0	0	15	0	0	0	0	0	0	0	0	0	0	0	0	0	0
92f1720367db58c68a96eceb9feb416a	0	0	0	0	0	0	0	0	0	0	0	0	0	0	7	0	0	0	0	0	0	0	0	0	0	0	0	0	0	0	0	0	0	0	0	0	0	0	0	0	0	0	14	0	0	0	0	0	0
e2820e299f6edfe2b2fbf16a74327f01	0	0	38	34	5	0	84	417	0	34	142	39	19	12	0	146	0	175	64	0	35	36	0	0	94	11	3028	0	66	112	1934	115	0	17	44	60	17	0	236	376	0	103	0	0	76	101	0	120	0
06d98800933cb6ed0a1c6906a33cfef5	0	0	0	0	0	789	0	0	0	0	0	0	0	0	0	0	0	0	0	0	0	0	0	0	0	0	0	0	0	0	0	0	0	0	0	0	0	0	0	0	0	0	0	0	0	0	0	0	0
a988602437f548993124cbc5b7314fd7	17	269	0	61	288	75	0	58	289	54	38	0	246	128	122	96	83	217	236	62	69	35	35	40	368	119	246	33	114	36	375	115	0	77	120	212	359	278	24	364	286	124	19	51	87	707	0	248	0
5e9716fe354ce3a88fec0f3d80b9536e	0	0	0	0	0	0	0	0	0	0	0	0	0	0	0	0	0	0	0	0	0	0	0	0	0	0	0	0	0	0	0	0	0	0	0	0	0	0	16	0	0	0	0	0	0	0	0	0	0
3b2c4f303bac2bb0e86f2cbd76998303	0	30	99	0	41	46	0	19	55	0	0	0	0	0	59	0	27	0	0	11	0	0	0	20	0	0	0	0	0	0	0	0	15	51	0	0	35	31	0	0	35	0	0	142	0	35	9	0	116
5312b61b18b5d94cddc8267bd8d40f36	0	0	0	0	0	0	0	0	0	0	0	0	0	0	0	0	0	0	0	0	0	0	0	0	0	0	0	0	0	0	0	0	0	30	0	0	407	0	0	0	0	0	172	0	0	0	0	0	0
f41fe93f9a9a125bd1b56490be38d5fd	0	0	0	0	0	0	0	0	0	0	0	0	0	39	0	0	0	0	0	0	0	0	0	0	0	0	0	0	0	0	0	0	0	0	0	0	0	0	0	0	0	0	0	0	0	0	0	0	0
ba02d414ff984513562e31883b18969d	0	0	0	0	0	0	0	0	0	0	0	0	0	0	0	0	0	0	0	0	0	0	0	41	0	0	0	0	0	0	0	0	0	0	0	0	0	0	0	0	0	0	0	0	0	0	0	0	0
147691a34453db06f8d954418346038b	0	0	0	0	0	0	0	0	0	0	0	0	0	0	0	0	0	0	0	0	0	0	0	0	2516	0	0	0	0	0	0	0	0	0	0	0	0	0	0	0	0	0	0	0	0	0	0	0	0
c15a4f02fab03dd8ff815c59f7f00873	0	0	0	0	0	0	0	0	0	0	0	0	0	0	0	0	0	0	0	0	0	0	0	0	0	0	0	0	0	0	0	0	0	57	0	0	0	0	0	0	0	0	0	0	0	0	0	0	0
97eab20b5419c251da480f1d09c35859	51	0	1069	138	0	116	0	104	0	0	30	16	439	74	0	24	0	0	67	0	0	150	54	0	277	98	142	0	37	22	143	53	18	263	21	25	40	125	0	136	107	134	0	0	67	30	167	28	161
df10a151cc3986c5d87adde5ab0e42a9	220	53	73	0	40	56	0	49	42	0	0	0	33	0	75	0	19	0	76	0	21	0	0	0	0	0	29	52	0	0	23	23	378	64	0	0	90	59	0	156	79	16	0	34	0	0	29	0	26
fbdba74eaed25b12fae6c5ad77890ec9	0	0	0	54	0	0	0	0	0	0	27	0	0	0	0	22	0	0	28	0	0	42	0	0	21	0	0	0	30	0	0	0	69	0	19	0	0	0	0	0	0	0	0	0	0	31	0	0	33
1b1b88e9a5073e34498b1b593a64a8c8	0	0	0	0	0	0	0	0	0	0	0	0	0	0	0	0	0	0	50	0	0	0	0	0	0	0	0	0	0	0	0	0	0	0	0	0	0	0	0	0	0	0	0	0	0	0	0	0	0
e9529f24f9749a6cc6f91350c9bf87d6	0	0	0	194	0	0	0	0	0	0	0	26	0	0	0	0	0	0	44	0	0	122	0	0	0	0	0	0	0	0	0	0	0	0	0	0	0	0	0	0	0	132	0	0	221	0	0	0	0
912817de4757b6401d99f5c73e00eafb	0	0	0	0	0	0	0	0	0	0	0	0	0	0	0	0	0	0	0	0	0	0	0	18	0	0	0	0	0	0	0	0	0	0	0	0	0	0	0	0	0	0	0	0	0	0	0	0	0
eb239935fa03d2fa68c1412ae18a3105	0	0	0	0	0	0	0	0	0	0	0	0	0	0	0	0	0	0	0	0	0	0	0	0	0	0	0	0	0	0	0	0	0	0	0	0	0	0	0	0	0	0	66	0	0	0	0	0	0
202d81d0b6fdd81c6ac8424f5b7196bd	0	0	0	0	0	0	0	0	0	0	0	0	0	0	0	0	0	0	0	0	0	0	0	0	0	0	0	0	0	0	0	0	38	0	0	0	0	0	0	0	0	0	0	0	0	0	0	0	0
3fedf28a8a94b9da51b50fffe77f1ef7	0	0	0	0	0	0	0	0	0	0	0	0	0	0	0	0	0	0	0	0	0	0	0	0	0	0	0	0	0	0	0	0	0	0	0	0	0	0	0	0	0	0	0	43	0	0	0	0	0
84f485fe5fe1c91305ef1fbe7e1934e3	0	0	0	0	0	0	0	0	0	0	0	0	0	0	0	0	0	0	0	0	0	0	0	0	0	0	0	0	0	0	0	0	0	0	0	0	0	0	0	0	0	0	0	0	0	0	0	0	0
3e5a407d0e65ca272af476811e40f272	2	0	0	0	0	0	0	0	0	0	0	0	0	0	0	56	0	0	0	0	0	0	0	0	0	0	0	0	0	0	0	0	1726	0	0	0	0	0	0	0	0	0	0	0	0	0	0	0	0
831e7c636f42b7373b45cde169a6135b	0	0	0	0	0	0	0	0	0	0	0	0	0	0	0	0	14	0	0	0	0	0	0	0	0	0	0	0	0	0	0	0	30	0	0	0	0	0	0	0	0	0	0	0	0	0	0	0	45
cebb5026fb4b488e700af59fe2937db9	0	0	0	0	0	0	0	0	0	0	0	0	0	0	0	0	0	0	0	0	0	0	0	0	0	0	0	0	0	0	0	0	0	0	0	0	0	0	0	0	0	0	0	0	0	0	0	0	0
1a2e69b19822b6a77b0621d194d7173d	0	0	0	0	0	0	0	0	0	0	0	0	0	0	0	0	0	0	0	0	0	0	0	0	0	0	0	0	0	0	0	0	0	0	0	0	0	0	0	0	0	0	0	0	0	0	0	0	0
6b8f78389f1c4e4ec46ba90d547fb87f	0	0	0	0	0	0	78	0	0	0	0	0	0	0	0	0	0	0	0	0	0	0	0	0	0	0	0	0	0	0	0	0	0	0	0	0	0	0	0	0	0	0	0	0	0	0	0	0	0
3342a0264b35a7e088c8538503498f03	0	0	0	0	0	13	0	0	0	0	0	26	0	0	0	0	18	0	81	0	0	0	0	0	0	0	0	0	0	256	0	52	0	20	0	0	0	43	0	0	37	0	0	0	0	0	0	0	0
0ef5a07298e7001bb58ae9467cbd4657	68	0	0	0	0	0	0	0	0	0	0	0	0	0	0	0	0	0	0	0	0	0	0	0	0	0	0	0	0	0	0	0	0	0	0	0	0	0	0	0	0	0	0	0	0	0	0	0	0
38a64061467a119bf9f863fbb595d7d8	27	47	0	0	57	0	0	32	0	0	0	0	0	0	0	0	0	0	0	45	0	0	0	0	0	0	81	22	0	0	27	0	473	10	0	0	257	0	0	113	0	0	20	0	0	0	7	0	0
a1cfc917df0a24246e6162049796a60d	0	42	0	0	44	0	0	0	0	0	0	0	0	0	0	0	0	0	0	0	0	0	0	0	0	0	0	0	0	0	0	0	0	0	0	0	0	0	0	0	0	0	0	0	0	0	0	0	0
151163af62275570b630403463efa30c	0	125	465	203	151	152	113	180	0	0	92	0	434	140	230	150	93	0	253	0	0	222	0	74	81	118	94	0	138	139	138	0	0	0	89	84	0	0	163	0	0	173	0	331	123	0	370	77	0
e47d3fdd0a481475a907690933302ff5	0	68	0	90	107	210	38	80	0	36	136	0	0	63	63	22	76	70	129	122	43	46	0	0	0	54	47	0	274	101	59	150	0	101	67	39	29	0	209	178	0	167	92	0	116	74	118	102	29
59b8e611f3402d6d679b8b08b4178ee5	0	0	0	0	0	0	0	158	0	0	0	0	0	0	0	0	0	0	0	0	0	0	0	0	0	0	0	0	0	0	0	0	0	0	0	0	0	0	0	0	0	0	0	0	0	0	0	0	0
3acac66a6bd974609386500698943140	0	0	0	0	0	0	0	0	0	0	0	0	0	0	0	0	0	0	0	0	0	0	0	0	0	0	0	0	0	0	0	0	0	19	0	0	0	0	0	0	0	0	0	0	0	0	0	0	0
c130baecd35f08a8f79bdfbdc0abb6c0	0	0	0	0	0	0	0	0	0	0	8	0	0	0	0	0	0	0	0	0	0	0	0	0	0	0	0	0	0	0	0	0	37	0	0	0	0	0	0	0	0	0	0	0	0	0	0	0	0
7001b8746aba91c1600caec17e60491b	0	0	0	24	0	0	0	0	0	0	0	0	0	0	0	0	0	0	0	0	0	0	0	0	0	0	0	0	0	0	0	0	0	0	0	0	0	0	0	0	0	0	0	0	0	0	0	0	0
b6f818fbbc8e2f9003555ee2a1389474	0	0	0	0	0	0	0	0	0	0	0	0	0	0	0	0	0	0	0	0	0	0	0	0	0	0	0	0	0	0	0	0	0	14	0	0	0	0	0	0	0	0	0	0	0	0	0	0	13
e581427b80e95f5c82aaa998a3209fe8	0	0	0	0	0	0	0	15	0	0	0	0	0	0	0	0	0	0	0	0	0	0	0	0	0	0	0	0	0	0	0	0	0	0	0	0	0	0	0	0	10	0	0	0	0	0	0	0	0
cf4e47b4549248bdaaef79372936e3c9	0	179	0	242	202	124	96	26	157	23	62	0	0	0	0	17	0	108	100	146	180	170	0	35	116	0	0	29	233	56	0	0	0	0	65	22	0	0	0	0	0	0	0	85	0	44	53	0	0
1ef72208796c61a2c8f1f70369dcac47	11	0	0	7	0	45	8	19	26	6	59	0	0	9	0	0	17	7	0	25	0	12	0	71	0	0	31	41	0	0	0	0	120	0	7	0	236	0	0	42	0	0	0	67	0	0	16	0	0
c32177147ca09aa7f3960b9e58ae05c8	0	0	0	0	0	0	0	0	0	0	0	0	0	0	0	0	0	0	0	0	0	0	0	0	0	0	0	0	0	0	0	0	0	0	22	0	0	0	0	0	0	0	0	0	0	0	0	0	0
4eb5b11756f8b88061fc2031dbe019e5	0	0	0	0	0	0	0	0	0	0	0	0	0	0	0	0	0	0	0	0	0	0	0	0	0	0	0	0	0	0	0	0	0	0	0	0	0	0	0	0	0	0	0	0	0	0	0	0	0
c0d13894adc972833301d59d866f62ed	0	5	0	0	7	0	0	0	0	0	0	0	0	0	0	0	0	0	0	0	0	0	0	0	0	0	0	0	0	0	0	0	0	0	0	0	0	0	0	0	0	0	0	11	0	0	0	0	0
8d9af79a5040404b9a5be257f132af0c	0	0	0	0	0	0	0	0	0	0	0	0	0	0	0	0	0	0	0	0	0	0	0	0	0	0	0	0	0	0	0	0	0	0	0	0	0	0	0	0	0	0	0	0	0	0	0	0	0
c845eda99662b5a88a8c8e979ec07dd0	0	0	0	0	0	0	0	0	0	0	0	0	0	0	0	0	0	0	0	0	0	0	0	0	0	0	0	0	0	0	0	0	0	0	0	0	0	0	0	0	0	0	69	0	0	0	0	0	0
435f88cde9bdf191c11aeb003b0dfdfe	0	0	0	0	0	0	0	0	0	0	0	0	0	0	0	0	0	0	0	0	0	0	0	0	0	0	0	0	0	0	0	0	0	0	0	0	23	0	0	0	0	0	0	0	0	0	0	0	0
e775a1bd73818671c0003f413294b1c9	0	0	0	0	0	0	0	0	0	0	0	0	0	0	0	0	0	0	0	0	0	0	0	0	0	0	0	0	0	0	0	0	0	0	0	0	0	0	0	0	16	0	0	0	0	0	0	0	0
fb7391239646b16bebb90353ec71d2ae	0	0	0	0	0	0	0	0	0	0	0	0	0	0	0	0	0	0	0	0	0	0	0	0	0	0	0	0	0	0	0	0	0	0	0	0	0	0	0	0	0	169	0	0	0	0	0	0	0
c5b0467645f17ec0cec7d81883f1c156	0	0	0	0	0	0	0	0	0	0	0	0	0	0	0	0	0	0	0	0	0	0	0	0	0	0	0	0	0	0	0	0	0	0	0	0	0	0	0	1020	0	0	0	0	0	0	0	0	0
5088cf397b535435957b9d379796d86a	0	0	0	0	0	0	0	0	0	0	0	0	0	0	0	0	0	0	0	21	0	0	0	5	0	0	0	0	0	0	0	0	21	0	0	0	8	0	0	8	0	0	0	0	0	0	0	0	0
081d604ee154ead54a1fb0f67fd94636	0	0	0	0	0	0	0	0	0	0	0	0	0	0	0	0	0	0	0	0	0	0	0	0	0	0	0	0	0	0	0	0	0	0	0	0	0	0	0	0	0	0	0	0	0	0	0	0	0
e421621aab7b8fb928db2ae1a0273610	0	37	0	0	35	0	0	0	0	0	0	0	0	0	0	0	0	0	0	0	0	0	0	0	59	0	0	0	0	0	0	0	0	0	0	0	59	0	0	59	0	66	44	0	129	0	0	0	0
0e49e98e392a06709df0f7932cc3aa69	0	171	217	86	233	198	0	762	0	101	0	263	87	0	49	0	53	0	0	47	0	64	139	484	0	0	1307	0	234	63	169	20	0	237	179	0	0	194	0	0	65	0	0	210	0	0	250	81	69
bc37a1c91fb5610c7b12db3c92369d79	0	0	0	0	0	0	0	0	0	0	0	0	0	0	0	0	0	0	0	0	0	0	0	0	0	0	0	0	10	0	0	0	0	0	0	0	0	0	0	0	0	0	0	0	0	0	0	0	0
5ac5e725e9caf4fb840114cd8a440252	0	0	0	0	0	0	0	0	0	0	0	0	0	0	0	0	12	0	0	0	0	0	0	0	0	0	0	0	0	0	0	0	0	0	0	0	0	0	0	0	0	0	0	0	0	0	0	0	0
79fc9de14431cad8cf10d08534edf404	0	24	0	0	0	0	0	0	0	0	0	0	0	0	0	0	0	0	46	0	0	0	0	0	0	0	0	0	0	0	0	0	0	0	0	0	0	0	0	287	0	0	0	0	0	0	0	0	0
94ae364ff587d586d1fe6542624ad5f4	0	0	0	0	0	0	0	0	0	0	0	0	0	0	0	0	0	0	0	0	0	0	0	0	0	0	0	0	0	0	0	0	0	0	0	0	0	0	0	606	0	0	0	0	0	0	0	0	0
7e059ff0efe30c2a4de21c8edd6c440b	0	0	0	0	0	0	0	0	0	28	12	0	31	40	0	0	0	0	0	0	17	0	0	0	0	31	0	0	118	0	0	0	0	0	57	0	0	0	0	0	0	0	0	0	0	0	0	0	0
a44e3704e5158407e86a0211d3a38c56	0	17	0	0	12	3	0	0	5	0	0	0	0	0	0	0	0	0	0	17	0	0	0	9	0	0	0	0	0	0	0	0	0	0	0	0	0	0	0	0	0	0	0	0	0	0	13	0	0
dca61a2b2d2ce737e34f00d59387363b	0	18	0	0	33	0	0	0	0	0	0	0	0	0	0	0	0	0	0	0	0	0	0	0	0	0	0	0	0	0	0	0	0	0	0	0	0	0	0	0	0	0	0	0	0	0	0	0	0
3710c78b022f453e39465d41c351d327	0	0	0	0	0	0	0	0	0	0	0	0	0	0	0	0	0	0	0	0	0	0	0	0	0	0	0	0	0	0	0	0	0	0	0	0	0	0	0	0	0	0	0	0	0	0	0	0	13
0f5f014288caa8cdf7d7bf77ce7d464b	0	0	0	0	0	0	0	0	0	0	0	0	0	0	0	0	0	0	0	0	0	0	0	0	0	0	0	0	0	0	0	0	0	0	0	0	0	0	0	20	0	0	0	0	0	0	0	0	0
8577ef35518d18b2f2bb6c874d754c95	0	0	0	14	0	0	0	0	0	0	0	0	0	0	0	0	0	0	0	0	0	0	0	0	0	0	0	0	0	0	0	0	0	0	0	0	0	0	0	0	0	0	0	0	0	0	0	0	0
ec431bcbaa9b47cbcb7047805a72c3d4	0	0	0	0	0	0	0	0	0	0	0	0	0	0	0	0	0	0	0	0	0	0	0	0	0	0	0	0	29	0	0	0	0	0	0	0	0	0	0	0	0	0	0	0	0	0	0	0	0
3fe42bc7a696916ab96a7c1e4f5b869f	0	0	12	0	0	0	9	0	13	0	0	0	10	0	6	0	0	0	0	0	0	0	0	0	0	0	0	0	0	0	0	0	9	0	0	0	0	8	0	0	6	0	0	14	0	0	0	0	18
28d1b92becff27685cef3d0d23cb5ea3	5	0	0	0	0	0	0	0	0	0	0	0	0	0	0	0	14	0	0	0	0	0	0	0	0	0	0	16	0	0	0	0	0	0	0	0	0	0	0	0	0	0	0	0	0	0	0	0	0
530c3f18faface5b8e392d2a3073aa7e	0	0	0	0	0	0	0	0	0	0	0	0	0	0	0	0	0	0	0	0	0	0	0	0	27	0	0	0	0	0	0	0	468	0	0	0	0	0	0	0	0	0	0	0	0	0	0	0	0
ac93b161ea87c334d60fe13cfad7762e	0	0	0	0	0	0	0	0	0	0	0	0	0	0	0	0	0	0	0	0	0	0	0	0	0	0	0	0	0	0	0	0	0	0	0	0	0	0	0	0	0	0	0	0	0	0	0	0	0
be49950bb0648bdae1dd4d7c9d641865	0	0	0	0	0	0	0	0	0	0	0	0	0	0	32	0	0	0	0	0	0	0	0	0	0	0	0	0	0	0	0	0	0	0	0	0	0	0	0	0	0	0	0	0	0	0	0	0	0
260a7aebf56efd89ee82732ee984b890	0	0	0	0	0	0	0	0	0	0	0	0	0	0	0	0	0	0	0	0	0	0	0	0	0	0	0	0	0	0	0	0	0	0	0	0	0	0	0	0	0	0	0	246	0	0	0	0	0
30d9d931b5b4c91c060b156d1642e02c	0	0	0	0	0	0	0	0	0	0	0	0	0	0	0	0	0	0	0	0	0	0	0	0	0	0	0	0	0	0	0	0	0	0	0	0	0	0	0	0	0	0	0	0	0	0	0	0	0
49df8ad8017a67e4024888867f633fea	0	0	0	0	0	0	0	0	0	0	0	0	0	0	0	0	0	0	0	0	0	0	0	0	0	0	0	0	0	0	0	0	0	0	0	0	0	0	0	0	0	0	0	0	0	0	0	14	0
623624a7a33bc2a138546453b9a88312	0	0	0	0	0	0	0	0	0	0	0	0	0	0	0	0	0	0	0	0	0	0	0	0	0	0	0	0	0	0	0	0	0	0	0	0	0	0	0	0	0	0	0	0	0	0	0	0	0
0c7c95c54444f65840aa5995c3f6c1b3	0	25	0	0	11	0	0	0	0	0	0	0	0	0	0	0	0	0	0	0	0	0	0	0	0	0	0	0	0	0	0	0	50	0	0	0	5	0	0	0	0	0	0	0	0	0	0	0	0
9e795228ea075b9b603d1d8c7e24097c	0	0	0	0	0	0	0	0	0	0	0	0	0	0	0	0	0	0	0	0	4	10	0	0	0	0	0	0	0	0	0	0	0	0	0	0	0	0	0	0	0	0	0	0	0	0	0	0	0
7c18af414bbbdf80b3cf58d7d41ef24c	0	0	0	0	0	0	0	0	0	0	0	0	0	0	0	0	0	0	0	0	0	0	35	0	0	0	0	0	0	0	0	0	0	0	0	0	0	0	0	0	0	0	0	0	0	0	0	0	0
0dfdd82280edcef6c028cc3969a2a219	0	162	31	196	139	190	162	152	0	129	102	104	0	318	0	84	184	47	0	0	0	120	103	182	0	267	0	0	309	74	46	77	0	74	264	40	218	0	147	216	0	65	68	26	69	123	0	114	0
cf25a021fe6a4408ea4b07a174b0f81e	0	0	0	0	0	0	0	77	0	0	0	0	0	0	0	0	0	0	0	0	0	0	0	0	0	0	0	0	0	0	0	0	0	0	0	0	0	0	0	0	0	0	0	0	0	0	0	0	0
fd39eebee5cc32f4c28eeb96f6301eae	0	0	0	0	0	0	0	0	0	0	0	0	0	0	0	0	0	0	0	0	0	0	0	0	0	0	0	0	0	0	0	0	0	0	0	0	24	0	0	0	0	0	0	0	0	0	0	0	0
2bc6b2debe6c40ed096d8960574a5072	0	0	0	0	0	0	0	0	0	0	0	0	0	0	0	0	0	0	0	0	0	122	0	0	0	0	0	0	0	0	0	0	0	0	0	0	0	0	0	0	0	0	0	0	0	0	0	0	0
982443286a7a935c52d1074ecb2a0ec6	0	0	44	70	0	0	0	386	0	161	0	108	127	211	0	83	0	0	225	0	0	85	615	0	332	236	449	0	208	80	316	0	0	0	371	0	0	169	37	223	102	15	97	0	0	313	16	0	0
b29f2d3afbc919a0128b7f407f357de6	0	0	0	0	0	0	0	0	0	0	0	0	0	0	0	0	0	0	0	0	0	16	0	0	0	0	0	0	0	8	0	0	0	0	0	0	0	0	0	0	0	0	0	0	0	0	0	0	0
5b099386be08a56e8b82911b6886f428	0	0	0	0	0	0	0	0	0	0	0	0	0	0	0	0	0	0	0	0	0	0	0	0	0	0	0	0	0	0	0	0	0	0	0	0	0	0	0	0	0	0	0	0	0	0	0	0	0
9f1df9550d735383a7ea6550fa9f09cf	0	0	0	0	0	0	0	0	0	0	0	0	0	0	0	0	0	0	0	0	0	0	0	0	0	0	0	0	0	0	0	87	0	0	0	0	0	0	0	0	0	0	0	0	0	0	0	0	0
9c6ad90e208b404238a7e275ce658cd9	0	0	0	0	0	0	0	0	0	0	0	0	0	0	0	0	0	0	0	0	0	0	0	0	0	0	0	0	0	0	0	0	0	0	0	0	0	0	0	0	0	0	0	0	0	0	0	0	0
00935902af28564f939ec0bc16c5c758	0	0	0	0	0	0	0	0	0	0	0	0	0	0	0	0	0	25	0	0	0	0	0	0	0	0	0	0	0	0	0	0	0	0	0	0	0	0	0	0	0	0	0	0	0	0	0	0	0
5c8687fa5eb17d5ac312d6a736e5b649	0	0	0	0	0	0	0	0	0	0	0	0	0	0	0	0	0	0	0	0	0	0	0	0	0	0	33	0	0	0	0	0	0	0	0	0	0	0	0	0	0	0	0	0	0	0	0	0	0
8a76a3bfd2bd961eb689023deff854ef	96	0	565	3002	0	0	174	3936	0	396	452	6	0	1153	8548	2765	533	0	3514	771	3743	2663	5	6	159	526	769	0	712	502	973	0	384	2142	566	18	6231	25	4	6227	27	32	253	0	27	272	176	0	63
bf27083f9a8e99eb5cb8456a8638d5b7	0	0	0	0	0	0	0	0	0	0	0	0	0	0	0	0	0	0	0	0	0	0	0	0	46	0	0	0	0	0	0	0	0	0	0	0	0	0	0	0	0	0	0	0	0	0	0	0	0
d69327f520291ab1d800ec90ccc62f55	0	0	0	0	0	0	0	0	0	0	0	0	0	0	0	0	0	0	0	0	0	0	0	0	0	0	0	79	0	0	0	0	0	0	0	0	0	0	0	0	0	0	0	0	0	0	0	0	0
ea0e1681297c6ba0c4e05e12b6b8cc3f	0	0	0	0	0	0	0	0	0	0	0	0	0	0	0	0	0	0	0	0	0	0	0	0	0	0	0	0	0	0	0	0	0	0	0	0	0	20	0	0	0	0	0	0	0	0	0	0	0
d81c22bcf287c5e0921785e78fcbba69	0	0	0	0	0	0	0	0	0	0	0	0	0	0	0	0	0	0	0	0	0	0	0	0	51	0	0	0	0	0	0	0	0	0	0	0	0	0	0	0	0	0	0	0	0	0	0	0	0
c1bded9e78486b14789bcb72072639c7	0	0	0	0	0	0	0	0	0	0	0	0	0	0	0	0	0	0	0	0	0	0	0	0	0	0	0	0	0	0	0	0	0	0	0	0	0	0	0	21	0	0	0	0	0	0	0	0	0
9c99285470770c0b21f82a522ea2fb5b	0	0	0	176	0	0	0	23	10	23	206	0	16	275	24	50	0	0	31	77	0	89	0	423	926	188	56	0	99	30	76	246	12	0	59	91	1195	67	100	35	77	33	0	0	19	88	22	35	0
ee18282ff4b0a20dad8851fa4f0a7313	0	0	109	0	0	0	0	0	0	0	0	0	0	0	0	0	0	0	0	0	0	0	0	0	0	0	0	0	0	0	0	0	0	0	0	0	0	0	0	262	0	0	0	0	0	0	0	0	0
fa6b5880480d563e2ef1bcbe52cb20e7	0	0	0	0	0	0	0	0	0	0	0	0	0	0	0	0	17	0	0	0	0	0	0	0	0	0	31	0	0	0	0	0	0	0	0	0	0	0	0	0	0	0	0	46	0	0	0	0	0
f8414e46b436cadf2b1b19ecddf9c7db	0	0	0	0	0	0	0	0	0	0	0	136	0	0	0	0	0	0	0	0	0	0	0	0	0	0	0	0	0	0	0	0	0	0	0	0	0	0	0	0	0	0	0	0	0	0	0	0	0
a84864630e66bfe4f6e2470dd95e0459	0	0	0	0	0	0	0	0	0	0	0	0	0	0	0	0	0	0	0	0	0	0	0	0	0	0	0	0	0	0	0	0	0	0	0	0	0	0	0	0	0	0	0	0	13	0	0	0	0
ace5368b00699d95ab51c3b193267298	0	0	0	0	0	0	0	0	0	0	0	0	0	0	0	0	10	0	0	0	0	0	0	0	0	0	0	0	0	0	0	0	0	0	0	0	0	0	0	0	0	0	0	0	0	0	0	0	0
73351ad4aeaf2d94401f7965da205c96	0	0	0	0	0	0	0	0	0	0	0	38	0	0	0	0	0	0	0	0	0	0	0	0	0	0	0	0	0	0	0	0	0	0	0	0	0	0	0	0	0	0	0	0	0	0	0	0	0
df62f27ff2e06f3033c267da760e9517	0	0	0	0	0	0	26	0	0	0	0	0	0	0	0	0	0	0	0	0	0	0	0	0	0	0	0	0	0	0	0	0	0	0	0	0	0	0	0	0	0	0	0	0	0	0	0	0	0
5122e7aa81e6d63aac3e398c9ad84822	58	0	0	0	0	35	0	37	0	19	57	0	0	60	0	0	165	0	121	59	0	0	93	65	222	32	0	0	78	0	0	0	0	0	43	153	0	0	0	265	0	58	0	112	70	60	0	129	0
8515ba96a366c95344a9ef2674627131	0	0	0	0	67	0	0	0	0	0	0	0	0	0	0	0	0	0	0	0	0	0	0	0	0	0	0	0	0	0	0	0	0	0	0	0	0	0	0	0	0	0	0	0	0	0	0	0	0
e90d0b9eabee462950297932c4775aa2	0	0	0	0	0	0	0	0	0	0	0	0	0	0	0	0	0	0	0	0	0	0	0	0	0	0	0	0	36	0	0	0	0	0	9	0	0	0	0	0	0	0	0	0	0	0	0	0	0
fa7ab4ddc5fe841d3df6b87791d99c5e	0	0	0	0	0	0	0	0	0	0	0	0	0	0	0	0	0	0	0	0	0	0	53	0	0	0	0	0	0	0	0	0	0	0	0	0	0	0	0	0	0	0	0	0	0	0	0	0	0
888dde47b5f886fdc8ab33437954f877	0	0	0	0	0	0	0	0	0	0	0	0	0	0	0	0	0	0	0	0	0	0	0	0	0	0	0	0	0	0	0	0	0	0	0	0	0	0	0	0	0	0	0	0	0	0	0	0	0
ceef2e15bf996579d60ced6e8ce249a5	54	0	0	0	0	0	0	0	0	0	0	0	0	0	83	34	0	0	0	0	0	0	0	0	0	47	0	0	0	0	0	0	0	0	0	0	0	0	0	0	81	38	0	0	0	0	0	0	0
67cfb450bd6c92e3ae31b224902ebff5	0	0	0	0	0	0	0	0	0	0	0	0	0	0	0	0	0	0	0	0	0	0	0	0	0	0	0	0	0	0	0	0	19	0	0	0	0	0	0	0	0	0	0	0	0	0	0	0	0
90ed22982d75a3389279c6ad54a787e0	63	0	175	90	0	83	42	32	1090	18	72	20	0	667	343	210	54	245	206	0	0	62	0	0	332	402	37	152	0	42	21	319	0	0	32	63	74	300	106	181	446	120	46	552	175	0	188	54	281
1e9c0b70d61821da5819332174e90fc4	0	0	0	41	0	0	0	0	0	0	0	0	0	0	0	0	0	0	0	0	0	17	0	0	0	0	0	0	0	0	22	0	0	0	0	0	63	0	0	31	0	0	0	0	0	0	0	0	0
5d007952016589b8aea6d24201737d30	0	0	0	0	0	0	0	0	0	0	0	0	0	0	0	23	0	0	0	0	0	0	0	0	0	0	0	0	0	0	0	0	0	0	0	0	0	0	0	0	0	0	0	0	0	0	0	0	0
d6b2a93625460081ccb886c58ed9cbbc	0	0	0	0	0	0	0	0	0	0	0	0	0	0	0	0	0	0	0	0	0	0	0	0	0	0	0	0	0	0	0	0	0	0	0	0	30	0	0	0	0	0	0	0	0	0	0	0	0
7d6826b4362ed805b8a0ecde7b41c522	0	0	0	0	0	0	0	0	0	0	0	0	0	0	0	0	0	0	0	0	0	0	0	0	0	0	94	0	0	0	0	0	0	0	0	0	0	0	0	0	0	0	0	0	0	0	0	0	0
85c25e988b129fba0e8804398ae3f3a1	0	0	0	0	0	0	0	0	0	0	0	0	0	0	0	0	0	0	0	0	0	0	0	0	0	0	0	0	0	0	0	0	0	0	0	0	0	0	0	0	0	0	0	0	0	0	0	11	0
298ad60812d901f9a59f9d3e1962cc19	0	26	0	0	0	0	0	0	0	0	0	0	0	0	0	0	0	0	0	0	0	0	0	0	0	0	0	0	0	0	0	0	0	0	0	0	0	0	0	0	0	0	0	0	0	0	0	0	0
28b9c1c3ab91a0aa23b8adaf42f31a7c	0	0	0	0	0	0	0	0	0	0	0	0	0	0	0	43	0	0	0	0	0	0	0	0	0	0	0	0	0	0	0	0	0	0	0	0	0	0	0	0	0	0	0	0	0	0	0	0	0
dde61db4fc67222b6e10f13409a83482	0	0	0	0	0	0	0	0	0	0	0	0	0	0	0	0	0	0	0	0	0	0	0	0	0	0	0	0	0	0	0	0	0	0	0	0	0	0	0	0	0	0	0	0	0	0	0	0	0
1cf2f2a2744923e930472643b35871ff	0	0	0	0	0	0	0	0	0	0	0	0	0	0	0	0	0	0	0	0	0	0	0	0	0	0	0	0	10	0	0	0	0	0	0	0	0	0	0	0	0	0	0	0	0	0	0	0	0
d9ccd0ee95f73785b2219c4c8d0beb3d	0	0	0	0	0	0	0	0	0	0	0	0	0	0	0	0	82	0	0	0	0	0	0	0	0	0	0	0	0	0	0	0	0	0	0	0	0	0	0	0	0	0	0	0	0	0	0	0	0
3d0fdaba5562129fdce740dd2c09f772	0	0	0	0	0	0	30	0	0	0	0	0	0	0	0	0	0	0	7	0	0	0	0	0	0	0	0	0	0	0	0	0	0	0	0	0	0	0	0	0	0	0	0	0	0	0	0	0	0
5f0c063da7f21adce2f94dabda9aec0e	0	0	9	0	0	3	12	0	10	0	0	0	4	0	9	0	0	0	0	3	0	0	0	8	0	0	0	13	0	4	0	0	0	0	0	0	0	25	0	0	41	0	0	5	0	0	0	0	0
d317f92ee4e37694c306455bfee279c4	0	0	0	0	0	0	0	0	0	0	0	0	0	0	0	0	0	0	0	30	0	0	0	0	0	0	0	0	0	0	11	0	81	0	0	0	57	0	0	53	0	0	0	0	0	0	0	0	0
9932508feb32ff927f89ac1e173468d9	0	0	0	0	0	0	0	0	0	0	0	85	0	0	0	0	0	0	0	0	0	0	0	0	0	0	0	0	0	0	0	0	0	0	0	0	0	0	0	0	0	0	0	0	0	239	0	0	0
cf17fc283b3a2255f8d569811b33bb9a	0	0	0	0	0	0	0	0	0	0	0	0	29	0	0	0	0	0	0	0	0	0	0	0	0	0	0	0	0	0	0	0	13	0	0	0	0	0	0	0	0	0	0	0	0	0	0	0	0
220f76fe1af1d09dbd1ea83aef85e394	0	0	41	779	0	110	2489	0	37	1113	158	0	320	618	0	27	123	0	166	28	0	472	462	245	1250	278	0	292	2218	0	0	0	0	97	1436	758	0	29	434	0	23	117	0	8	83	0	26	388	5
e7c7eefbaa0ac19ab3befc19348b6e5b	0	0	0	68	0	0	0	0	0	0	0	0	0	0	0	0	0	0	0	0	0	0	0	0	0	0	0	0	0	0	0	0	0	0	0	0	0	0	0	0	0	0	0	0	0	0	0	0	0
415c97b1b4ce2e95680595ec8abeed02	0	0	27	0	0	0	57	0	0	0	97	0	0	0	19	0	50	0	0	0	0	0	26	0	0	0	0	78	0	0	0	0	0	0	0	22	0	11	59	0	33	0	1554	27	0	0	32	0	0
23f194c5db26ca0dd842844dba811f11	0	0	0	0	0	0	0	0	0	0	0	0	0	0	0	0	0	0	0	0	0	0	0	0	0	0	0	0	0	65	0	0	0	0	0	0	0	0	0	0	0	0	0	0	0	0	0	0	0
76c2434790bb6ce5c8a61a0e28e9ffc1	0	0	0	0	0	0	0	0	0	0	0	0	0	0	0	0	0	0	451	0	0	0	0	0	0	0	0	0	0	0	0	0	0	0	0	0	0	0	0	0	0	0	0	0	0	0	0	0	0
674682a2afa0e8c1990327c6a5bf109f	0	83	0	0	0	0	0	0	0	0	0	0	0	0	0	0	0	0	0	0	0	0	0	0	0	0	0	0	0	0	0	0	0	0	0	0	0	0	0	0	0	0	0	0	0	0	0	0	0
19c3d80950cf244c4387ea294d8d83aa	0	0	0	0	0	0	0	0	0	0	0	0	0	0	0	0	0	0	0	0	0	0	0	0	0	0	0	0	0	0	0	0	0	0	0	0	0	0	0	0	0	0	0	0	0	0	0	0	0
de07b90651fa5e06d42973cf5334c4bc	0	11	0	0	0	0	0	0	0	0	0	0	0	0	0	0	0	0	0	0	0	0	0	0	0	0	0	0	0	0	0	0	0	0	0	0	0	0	0	0	0	0	0	0	0	0	0	0	0
c5ce8a08a31a9bc4563272f5b8fc1199	0	161	0	173	221	94	0	0	0	97	0	0	0	88	0	0	0	0	0	0	0	85	0	0	0	48	0	0	226	0	0	0	0	0	182	0	117	0	0	247	0	0	15	0	0	50	0	0	0
a46bd3e5b3d96d134e6a591e9f15b79e	0	0	0	0	0	0	0	0	0	0	0	0	0	0	0	0	0	0	0	0	0	0	0	0	0	0	0	0	0	0	0	0	0	0	0	0	0	0	0	0	0	0	0	0	0	0	0	0	0
74e15d49b28d6f1e1fb48e1ba7ab1abc	0	0	0	0	0	0	0	0	0	0	21	0	0	0	0	0	0	0	0	0	0	0	0	0	0	0	0	0	0	0	0	0	0	0	0	0	0	0	0	0	0	0	0	0	0	0	0	0	0
41f6b89d25df3555b783bc85416d41fb	0	0	0	0	0	0	0	0	0	0	0	0	0	0	0	0	0	0	0	0	0	0	0	0	0	0	0	0	15	0	0	0	0	0	0	0	0	0	0	0	0	0	0	0	0	0	0	0	0
6a3ad92d2d99672ae116d3d58d47d18c	0	0	0	0	0	0	0	0	0	0	0	0	0	0	0	0	0	0	0	0	0	0	0	0	0	0	0	0	0	0	0	0	0	0	0	0	231	0	0	0	0	0	0	0	0	0	0	0	0
0ef89d8e29ec3b943ca1ce10b18a6501	0	0	0	0	0	0	0	0	0	0	0	0	0	0	0	0	0	0	0	0	0	0	0	0	0	0	0	0	0	0	0	0	0	0	0	0	0	0	0	0	0	0	0	0	0	0	0	0	0
a38d0acd0b35bf63c23f72b287dfa782	0	0	0	0	0	0	0	0	0	0	0	0	0	0	0	0	0	0	0	0	10	0	0	0	0	0	0	0	0	0	0	0	0	0	0	0	0	0	0	0	0	0	0	0	0	0	0	0	0
e3cf1a37fe2bdae37910d6d8c3965d02	0	0	0	0	0	0	0	0	0	0	0	0	0	0	0	0	0	0	0	0	0	0	0	0	0	0	0	0	0	0	0	0	0	0	0	0	0	0	0	426	0	0	0	0	0	0	0	0	0
3787dea58919ac728995925d217a8256	0	0	0	0	0	0	0	0	0	0	0	0	0	0	0	0	0	0	0	0	0	0	0	0	0	0	0	0	0	0	0	0	0	0	0	0	100	0	0	0	0	0	0	0	0	0	0	0	0
73ca7b390edf902ec3e0319c1a180e5f	0	21	136	27	0	89	0	25	51	0	0	0	147	52	172	0	23	0	0	28	0	0	0	0	28	16	0	33	0	0	0	0	0	45	0	0	0	55	0	0	82	0	0	57	0	0	70	0	82
27136fc5e3359c25461d87fde90263ad	0	0	0	0	0	0	0	0	0	0	0	0	0	0	0	0	18	0	0	0	0	0	0	0	0	0	0	0	0	0	0	0	0	0	0	0	0	0	0	0	0	0	0	0	0	0	0	0	0
b1d56ebfac6f6fded48ddad76bea1e41	0	0	0	0	0	0	0	0	0	0	0	0	0	0	0	0	0	0	0	0	0	0	103	0	0	0	0	0	0	0	0	0	0	0	0	0	0	0	0	0	0	0	0	0	0	0	0	0	0
798363cfebd47161d9fddb30c4c3fa91	4027	0	132	0	0	0	87	38	0	0	0	0	5	19	0	0	0	0	99	0	21	0	61	0	0	30	70	0	0	24	54	0	43743	0	0	0	244	0	0	512	6	0	71	0	0	0	0	0	0
b7b93b7a6c6f213ee76a11685297c246	0	0	0	0	0	0	0	0	0	0	0	0	0	0	0	0	0	0	0	0	0	0	0	0	0	0	0	0	0	0	0	0	0	0	0	0	0	0	0	0	0	0	0	0	0	82	0	0	0
734a017543764edb97d6222530cf047d	0	0	0	0	0	0	0	0	0	0	40	0	0	0	0	0	0	0	0	0	0	0	0	0	0	0	0	0	0	0	0	0	0	0	0	0	0	0	0	0	0	0	0	0	0	0	0	0	0
e3f81820cdb57d37ec012e57ebc1628f	0	0	0	0	59	51	0	134	0	0	0	0	0	0	0	0	83	0	0	0	0	0	0	315	0	0	123	346	0	0	0	0	174	0	0	0	77	0	0	70	0	0	0	72	0	0	0	0	0
291e388972b6b2928787f0e3b7890fc7	0	0	0	0	0	0	0	0	0	0	0	0	0	0	0	0	0	0	0	0	0	0	0	0	0	0	0	0	0	0	0	0	34	0	0	0	0	0	0	0	0	0	0	0	0	0	0	0	0
b9123e2213ed54afb3cc989e8e64398b	0	0	0	0	0	0	0	0	0	0	0	0	0	0	0	0	0	0	0	0	0	0	0	0	0	0	0	63	0	0	0	0	0	0	0	0	0	0	0	0	0	0	0	0	0	0	0	0	0
d51f96ad4c1e723be120b6f15eb69553	0	0	46	0	0	6	0	0	30	0	0	0	115	0	0	0	96	0	0	0	0	0	0	14	0	0	0	49	0	0	0	0	0	105	0	0	0	14	0	0	35	0	0	1078	0	0	23	0	0
3329b7a4c6bae018a7e075ffdc8d2d59	0	0	0	0	0	0	0	0	0	0	0	0	0	0	0	0	0	0	0	0	0	0	26	0	0	0	0	0	0	0	0	0	0	0	0	0	0	0	0	0	0	0	0	0	0	0	0	0	0
37c376175c79538f58e0ef180e8b74af	0	0	0	0	0	0	0	0	0	0	0	49	0	0	0	0	0	24	0	0	0	0	0	0	0	0	0	0	0	0	0	0	0	0	0	0	0	0	0	0	0	0	0	0	0	0	0	0	0
ca9824d6de367a3bce47b8f72a321c4a	0	0	0	0	0	0	0	0	0	0	0	0	0	0	0	0	0	0	0	0	0	0	0	0	0	0	0	0	30	0	0	0	0	0	0	0	0	0	0	0	0	0	0	0	0	0	0	0	0
25ec6173863bd2c3719dad621bd6df72	0	0	0	0	0	0	0	0	0	0	0	49	0	0	0	0	0	0	0	0	0	0	0	0	0	0	0	0	0	0	0	0	0	0	0	0	0	0	0	0	0	0	0	0	0	0	0	0	0
6b509cdbd3f3798e0972f9ed654a77b4	0	92	0	32	99	98	0	0	29	0	25	0	38	34	55	0	0	113	38	84	231	17	0	25	218	45	0	0	0	52	27	44	0	121	0	175	48	0	0	350	0	155	0	0	153	70	28	22	33
c07fd5a3455fcc62550e0490cefdb317	0	0	0	0	0	0	0	0	0	0	0	0	0	0	0	0	0	0	0	0	0	0	0	0	0	0	0	0	0	0	0	0	0	0	0	0	0	0	0	0	0	0	19	0	0	0	0	0	0
c0be85ef37ca371aa8dfefd72884f924	0	0	0	0	0	0	0	0	0	0	0	0	0	0	0	0	0	0	0	0	0	0	0	0	0	0	0	0	0	0	0	0	0	0	0	0	0	0	0	0	0	0	0	0	0	0	0	0	0
d2f4bab93b9af1fa2b1db99b368b0e0d	0	0	0	0	0	0	0	0	0	0	0	0	0	0	0	0	0	0	0	0	0	0	0	0	0	0	0	0	0	0	0	0	0	0	0	0	0	0	0	0	0	0	0	0	0	0	0	0	174
8a508be35eb70c6aa2d1be49a918c482	0	0	34	0	0	9	0	0	0	0	32	79	0	0	0	0	0	0	0	0	0	0	0	0	0	0	0	0	0	39	0	0	0	0	0	0	0	123	0	0	82	0	0	0	0	46	21	0	0
f67127ae3a39b001b6d1df651ce49d3e	0	0	0	0	0	13	0	0	0	0	59	52	45	146	18	57	0	110	0	0	21	0	0	0	83	58	0	0	9	204	0	0	312	0	0	87	40	0	0	0	0	72	59	0	36	0	0	0	0
b62d2ce975651bfc9a9d23beed65c91e	0	45	34	0	77	0	0	63	91	0	114	0	34	31	44	0	160	19	39	0	0	0	37	0	0	0	161	134	0	55	75	8	1019	0	0	0	189	40	28	163	72	0	17	57	0	0	40	0	0
e4eec2c4fa7cbe1f46359d81a1466f9f	0	0	0	0	0	0	49	0	0	0	0	0	0	0	0	0	0	0	0	0	0	0	0	0	0	0	0	0	0	0	0	0	0	0	0	0	0	0	0	0	0	0	0	0	0	0	0	0	0
119eea33cb9f505d6a20297d132e792a	18	0	19	37	0	26	7	0	0	0	61	0	0	10	13	0	0	18	72	18	185	26	0	0	0	0	29	0	0	24	19	36	0	15	0	78	0	12	0	20	0	95	0	0	74	16	0	0	0
8fabf5e1f749c3e4e8c63ea16c3fa96f	0	0	0	0	0	0	0	0	0	0	0	0	0	0	0	0	0	0	0	0	0	0	0	0	20	0	0	0	0	0	0	0	0	0	0	0	0	0	0	0	0	0	0	0	0	0	0	0	0
824461acb68c3c523788052d1f3e520e	0	0	0	0	0	0	0	0	0	0	0	0	0	0	0	0	0	0	0	0	0	0	0	0	101	0	0	0	84	0	0	0	0	0	70	0	0	0	0	0	0	0	0	0	0	0	0	0	0
4aedf0d8fe492a5250d65106b0d802a7	0	0	0	0	34	0	0	0	0	0	0	0	0	0	0	0	0	0	0	0	0	0	0	0	0	0	0	0	0	0	0	0	0	0	0	0	0	0	0	0	0	0	0	0	0	0	0	0	0
334e701e5878d2e80994f6e88dbca46b	0	0	0	0	0	0	0	0	0	0	0	0	0	0	0	0	0	0	0	0	0	0	0	0	0	0	0	0	0	0	36	0	0	0	0	0	0	0	0	0	0	0	0	0	0	0	0	0	0
ea23bd6c6ab8a00116745ec77d9d0f14	0	0	0	0	0	0	0	0	0	0	0	0	0	0	0	0	0	0	0	0	0	0	0	0	0	0	0	0	0	0	0	0	0	0	0	0	0	0	0	0	0	0	0	0	0	0	0	0	745
0c338be45a91276647225bf240d13f58	0	0	0	0	0	72	0	0	91	0	0	0	0	0	48	0	0	0	0	38	0	0	0	0	0	0	0	0	0	0	0	0	0	0	0	0	0	57	0	0	60	0	0	0	0	0	50	0	119
b8df1c2a47e6698247aaa5d843720ecb	0	0	0	0	0	0	0	0	0	0	0	0	32	0	0	0	0	0	0	0	0	0	0	0	0	0	0	0	0	0	0	0	0	0	0	0	0	0	0	0	0	0	0	42	0	0	0	0	0
76d1ae230f90a038ae3dfdc0adb4db26	0	0	0	0	0	40	0	0	0	0	0	0	0	0	29	0	0	0	0	0	0	0	0	0	0	0	0	54	0	0	0	0	0	22	0	0	0	60	0	0	59	0	0	0	0	0	0	0	0
d83291cbed8bf49af4226352871caac2	0	0	0	0	0	134	0	0	0	336	61	383	0	0	24	46	392	0	0	0	0	0	88	868	0	0	0	0	621	129	0	0	0	98	583	0	0	24	0	41	23	0	0	0	0	0	150	0	14
85653c5bac758b347d82b3adfea29647	0	0	0	0	0	0	0	0	0	0	0	0	0	0	0	0	0	0	0	0	0	0	0	0	0	0	0	0	0	0	0	0	0	0	0	0	0	0	0	0	0	0	0	0	0	0	0	0	0
4adebf4f1c8382ede44f63b62d6a1172	0	0	0	0	0	0	0	0	0	0	0	0	0	0	0	0	0	0	0	0	0	0	0	0	0	0	0	0	0	0	0	0	0	0	0	0	0	0	0	0	0	0	0	0	0	0	0	0	0
793ea2c7ec70486b07af0694c5a8cb9d	0	0	0	0	0	0	0	0	0	0	0	0	0	0	0	0	0	0	0	0	0	0	0	0	0	0	0	4	0	4	0	0	0	0	1	0	0	0	0	0	11	0	0	0	0	0	0	0	5
a2b3a4ea12d43921db3f032351597359	0	202	0	0	0	0	0	0	0	0	0	0	0	0	0	0	0	0	0	0	0	0	0	0	0	0	0	0	0	0	0	0	0	0	0	0	0	0	0	0	0	0	0	0	0	0	0	0	0
ae1a076ec165fc8a5326dc4aed91b92d	90	0	0	0	0	0	0	0	0	0	0	0	0	0	0	0	0	0	0	0	0	0	0	0	0	0	0	0	0	0	0	30	0	0	0	0	0	0	0	56	0	0	0	0	0	0	0	0	0
63e1efc90bb6a57c147caa00f6b31661	0	0	0	0	0	0	0	0	0	0	0	0	0	0	0	0	0	0	0	0	0	0	0	0	0	0	0	10	0	0	0	0	0	0	0	0	0	0	0	0	0	0	0	0	0	0	0	0	0
4b0e12bada953d057850d45b6da1f808	0	98	0	0	99	0	0	0	0	0	0	0	0	0	0	0	0	0	0	0	0	0	0	0	0	0	0	0	0	0	0	0	0	0	0	0	0	0	0	0	0	0	0	0	0	0	0	0	0
76f3df5cf5d1d296eccca8285c9df30b	0	0	0	0	0	0	0	0	0	0	0	0	0	0	0	0	0	0	0	0	0	0	0	0	0	0	0	0	0	0	0	0	0	0	0	0	0	0	0	0	0	0	0	0	0	0	0	0	0
121ebcb17de48d72e848abef0dc6fa21	0	0	0	0	0	0	0	0	0	0	0	0	0	0	0	0	0	0	0	0	0	0	0	0	0	0	0	0	0	0	0	0	0	0	0	0	0	0	0	0	0	0	0	0	0	0	0	0	0
5a5041c7e4df4a472bf0256d7e25aa26	0	0	0	0	0	0	0	0	0	0	0	0	0	0	0	0	0	0	0	0	0	0	0	0	0	0	0	0	0	0	0	0	0	0	0	0	0	0	0	0	0	0	0	0	0	0	0	0	0
c7a7a8124434d4c34364b8a0fe4420df	0	19	24	0	17	0	0	0	0	0	0	0	79	0	0	0	29	0	0	19	0	0	0	18	0	0	0	0	0	0	0	0	0	0	0	0	0	10	0	16	12	0	0	74	0	0	27	0	17
0b0fcc44abe5d5b611e81e403993f0ed	0	0	0	0	0	0	0	0	0	0	0	0	0	0	0	0	0	0	0	0	0	0	0	0	0	0	0	0	0	0	48	0	0	0	0	0	0	0	0	0	0	0	0	0	0	0	0	0	0
d1fca3ded137275a04916f78180538cd	0	31	0	0	26	0	69	0	0	0	0	0	0	0	0	0	0	0	0	0	0	0	0	0	0	0	0	0	34	0	0	0	14	0	16	0	56	0	0	0	0	0	0	0	0	73	0	0	0
bff981e4d69ed5cde033f53431bc78a5	0	0	0	0	0	0	0	0	0	0	0	0	0	0	0	0	0	0	0	0	0	0	0	0	0	0	0	0	0	0	0	0	0	0	0	0	0	0	0	0	0	0	14	0	0	0	0	0	0
e576271690e327bded5a95cb60d237d0	0	167	0	0	160	0	0	0	0	0	0	0	0	0	0	0	0	0	0	73	0	0	0	0	0	0	0	0	0	0	0	0	0	0	0	0	251	0	0	39	0	0	0	0	0	0	0	0	0
62f77b3314e5e115c36d27c24bdb3c87	0	0	0	0	0	0	0	0	0	0	0	0	0	0	0	0	0	0	0	0	0	0	0	0	0	0	0	0	0	0	0	109	0	0	0	0	0	0	0	0	0	0	0	0	0	0	0	0	0
[truncated: 21,057 more rows]
[truncated: 11 more columns]
